# Supplementary material for: Promotion of the selective catalytic reduction of NOx with NH3 over microporous Cu-SSZ-13 by H2O and OH groups at low temperatures: a density functional theory study
Source: Royal Society of Chemistry journal article supplement (doi:10.1039/d2cy00796g), 2022-01-01
Supplement: d2cy00796g1.pdf [file d2cy00796g1.pdf]

## Supporting Information

### Promotion of the selective catalytic reduction of NO<sub>x</sub> with NH<sub>3</sub> over microporous Cu-SSZ-13 by H<sub>2</sub>O and OH group at low temperatures: a density functional theory study

*Yu Fu,<sup>a,b</sup> Guangzhi He,<sup>a,b,\*</sup> Yulong Shan,<sup>a</sup> Jinpeng Du,<sup>a,b</sup> and Hong He<sup>a,b,c,\*</sup>*

<sup>a</sup>State Key Joint Laboratory of Environment Simulation and Pollution Control, Research Center for Eco-Environmental Sciences, Chinese Academy of Sciences, Beijing 100085, China

<sup>b</sup>University of Chinese Academy of Sciences, Beijing 100049, China

<sup>c</sup>Center for Excellence in Regional Atmospheric Environment, Institute of Urban Environment, Chinese Academy of Sciences, Xiamen 361021, China

**87 pages, 9 figures, 11 tables**

---

\* Corresponding author: gzhhe@rcees.ac.cn, honghe@rcees.ac.cn

## Table of Content

|                                                                                                                                                                                               |     |
|-----------------------------------------------------------------------------------------------------------------------------------------------------------------------------------------------|-----|
| <b>Figure S1.</b> Four possible H atom positions on the Al-O sites in CHA zeolite.                                                                                                            | S3  |
| <b>Figure S2.</b> Structures of NH <sub>3</sub> adsorbed on the Cu-OH site in the 8-MR of Cu-SSZ-13.                                                                                          | S3  |
| <b>Figure S3.</b> Gibbs free energy profile for the reaction of NO molecule with the OH group of Cu <sup>II</sup> OH(NH <sub>3</sub> ) <sub>3</sub> <sup>+</sup> .                            | S3  |
| <b>Figure S4.</b> Gibbs free energy profile for the diffusion of Cu <sup>I</sup> (NH <sub>3</sub> ) <sub>2</sub> <sup>+</sup> through an 8-MR window into an adjacent cage.                   | S4  |
| <b>Figure S5.</b> Optimized structures and relative free energies of NO and O <sub>2</sub> co-adsorption on a pair of Cu <sup>I</sup> (NH <sub>3</sub> ) <sub>2</sub> <sup>+</sup> complexes. | S4  |
| <b>Figure S6.</b> Gibbs free energy profile for the reaction of NO <sub>2</sub> ligand with NH <sub>3</sub> molecule from the gas phase.                                                      | S5  |
| <b>Figure S7.</b> Gibbs free energy profile of the reaction of HONO with NH <sub>3</sub> over Brønsted acid sites.                                                                            | S5  |
| <b>Figure S8.</b> Gibbs free energy profile for the self-decomposition of NH <sub>2</sub> NO in the CHA cage.                                                                                 | S6  |
| <b>Figure S9.</b> Gibbs free energy profile of NH <sub>2</sub> NO decomposition with the assistance of Brønsted acid sites.                                                                   | S6  |
| <b>Table S1.</b> Ground-state spin multiplicity of gas molecules.                                                                                                                             | S7  |
| <b>Table S2.</b> Comparison of adsorption free energies for different reactants on Cu-OH site.                                                                                                | S7  |
| <b>Table S3.</b> Electronic energies (E) and Gibbs free energies (G) for cycle I, II, III and gas-phase species.                                                                              | S7  |
| <b>Table S4.</b> Electronic energies (E) and Gibbs free energies (G) for the transformation pathways of NH <sub>2</sub> NO and HONO intermediates.                                            | S8  |
| <b>Table S5.</b> Cartesian coordinates of the reactant complex (RC), transition state (TS), intermediate (IM), and product complex (PC) for cycle I.                                          | S9  |
| <b>Table S6.</b> Cartesian coordinates of RC, TS, IM, and PC for cycle II.                                                                                                                    | S27 |
| <b>Table S7.</b> Cartesian coordinates of RC, TS, IM, and PC for cycle III.                                                                                                                   | S47 |
| <b>Table S8.</b> Cartesian coordinates of RC, TS, IM, and PC for NH <sub>2</sub> NO self-decomposition.                                                                                       | S67 |
| <b>Table S9.</b> Cartesian coordinates of RC, TS, IM, and PC for NH <sub>2</sub> NO decomposition with the assistance of Brønsted acid sites.                                                 | S73 |
| <b>Table S10.</b> Cartesian coordinates of RC, TS, IM, and PC for NH <sub>2</sub> NO decomposition with the assistance of Brønsted acid site and Cu-OH site.                                  | S79 |
| <b>Table S11.</b> Cartesian coordinates of RC, TS, IM, and PC for HONO reacting with NH <sub>3</sub> over Brønsted acid sites.                                                                | S83 |

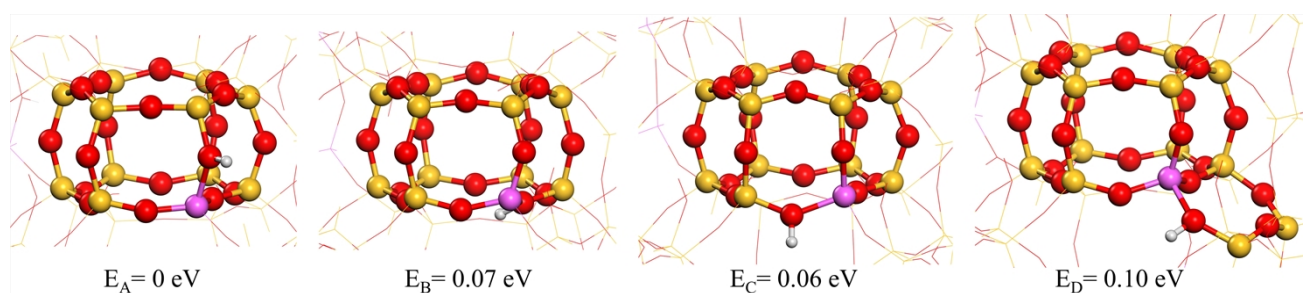

**Figure S1.** Four possible H atom positions on the Al-O sites in CHA zeolite. The relative energies ( $E$ ) of each structure are presented below. Atom color codes: Si (yellow), Al (pink), O (red), H (white).

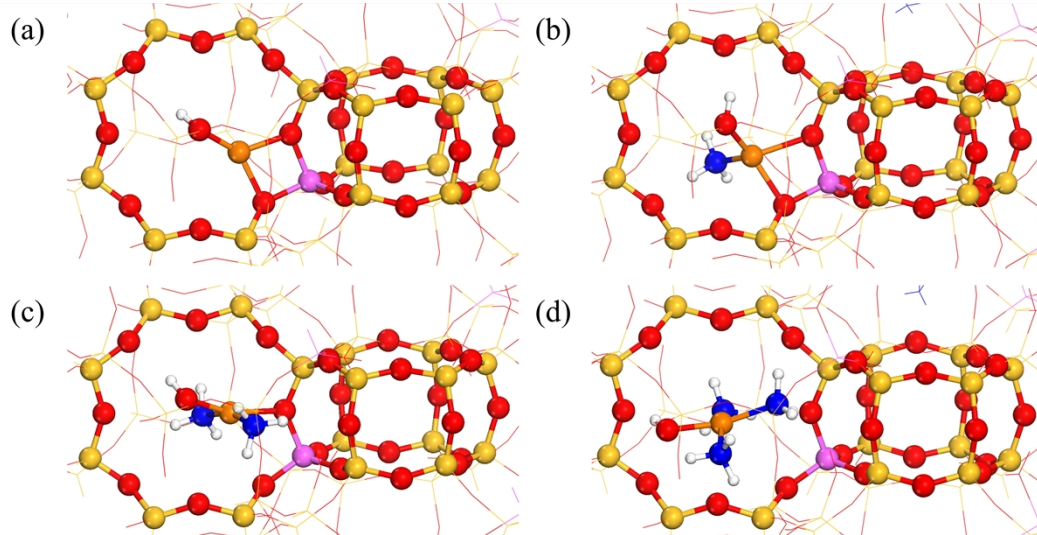

**Figure S2.** Structures of  $\text{NH}_3$  adsorbed on the Cu-OH site in the 8-MR of Cu-SSZ-13. (a)  $\text{Cu}(\text{OH})^+$  species anchored on the framework without any adsorption; (b), (c), and (d) corresponding to the adsorption of one, two, three  $\text{NH}_3$  ligands respectively. Atom color codes: Cu (gold), Si (yellow), Al (pink), O (red), N (blue), H (white).

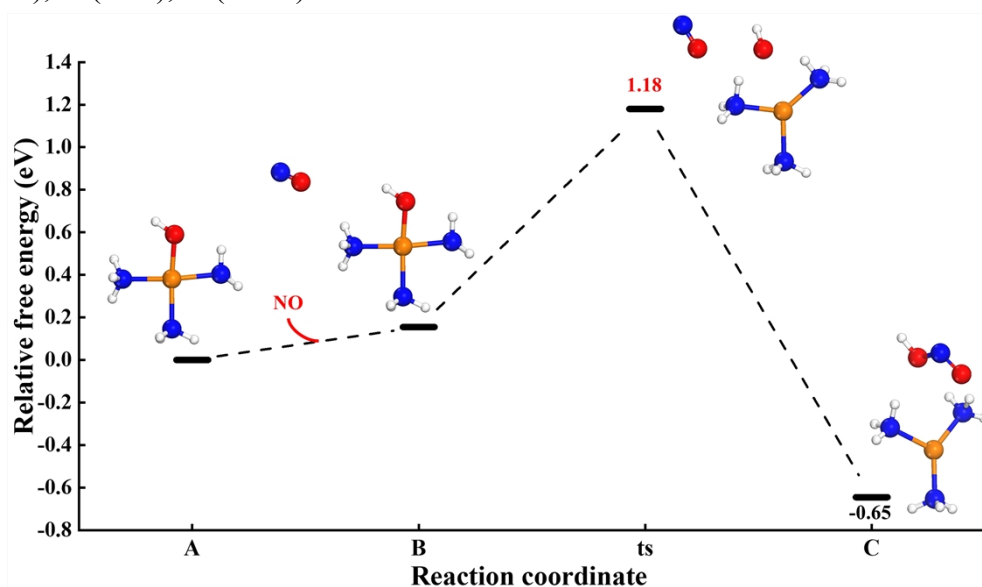

**Figure S3.** Gibbs free energy profile for the reaction of NO molecule with the OH group of  $\text{Cu}^{\text{II}}(\text{OH})(\text{NH}_3)_3^+$ . The structures of A, B, ts, and C are presented as insets. The zeolite framework is not shown for clarity. All legends are the same as those in Figure S2.

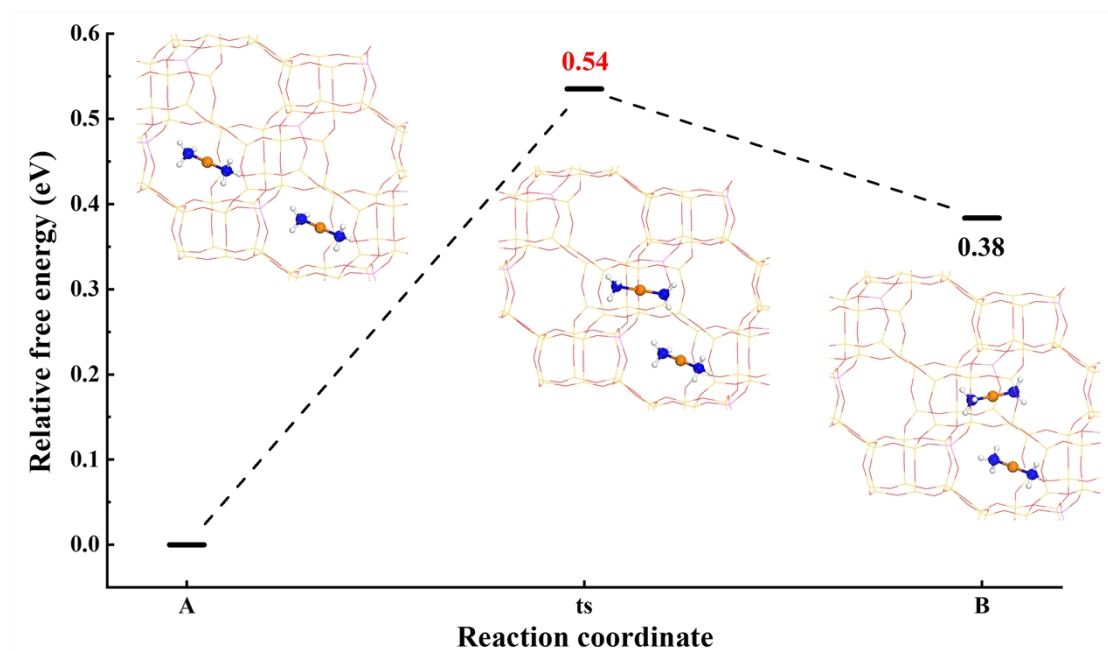

**Figure S4.** Gibbs free energy profile for the diffusion of  $\text{Cu}^{\text{I}}(\text{NH}_3)_2^+$  through an 8-MR window into an adjacent cage. The structures of A, ts, and B are presented as insets. The zeolite structure is displayed by thin lines. All legends are the same as those in Figure S2.

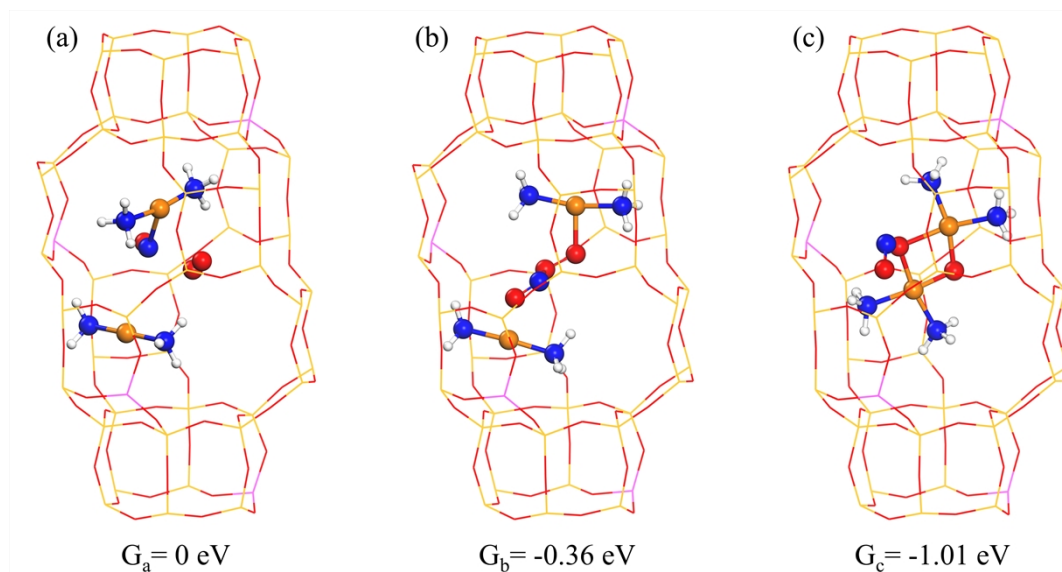

**Figure S5.** Optimized structures and relative free energies of NO and  $\text{O}_2$  co-adsorption on a pair of  $\text{Cu}^{\text{I}}(\text{NH}_3)_2^+$  complexes. The zeolite structure is displayed by thin lines. All legends are the same as those in Figure S2.

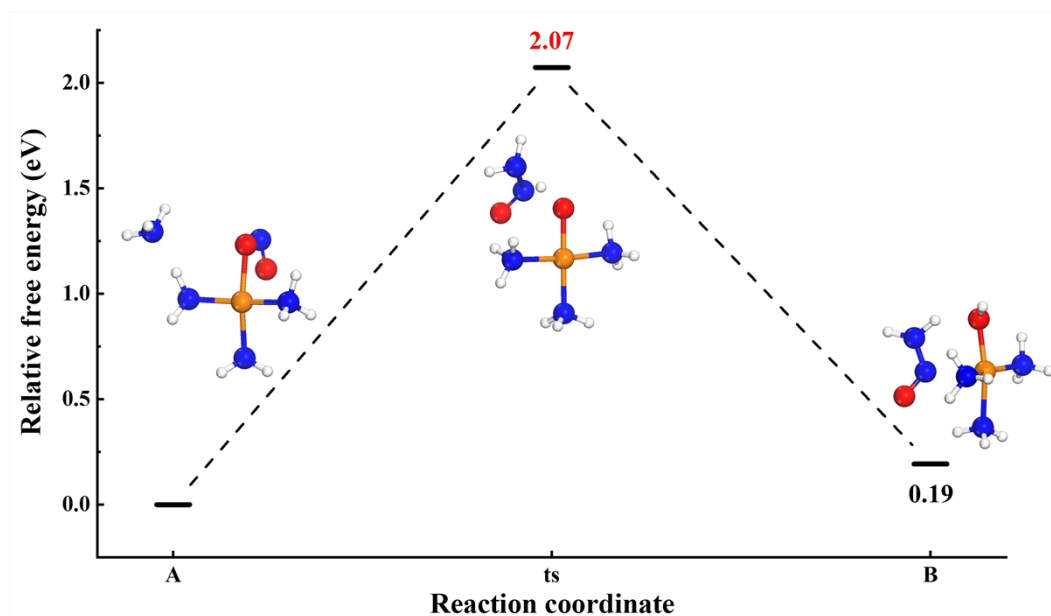

**Figure S6.** Gibbs free energy profile for the reaction of NO<sub>2</sub> ligand with NH<sub>3</sub> molecule from the gas phase. The structures of A, ts, and B are presented as insets. The zeolite framework is not shown for clarity. All legends are the same as those in Figure S2.

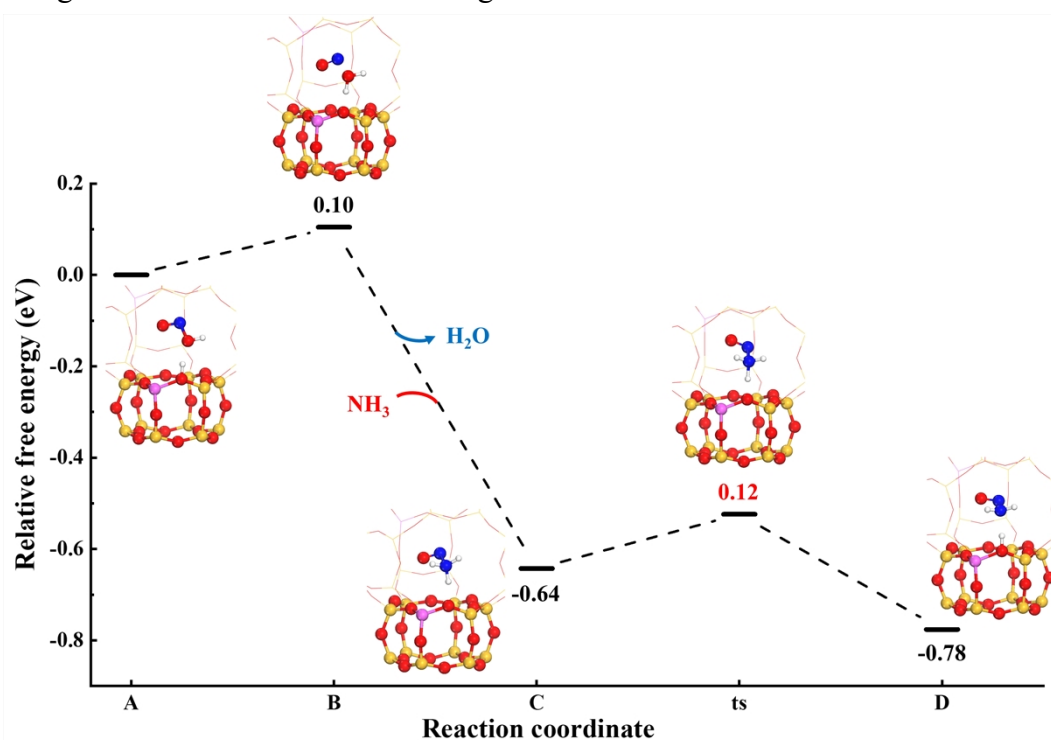

**Figure S7.** Gibbs free energy profile of the reaction of HONO with NH<sub>3</sub> over Brønsted acid sites. The structures of all elementary steps are presented as insets. Reactants are marked in red, and products are marked in blue. All legends are the same as those in Figure S2.

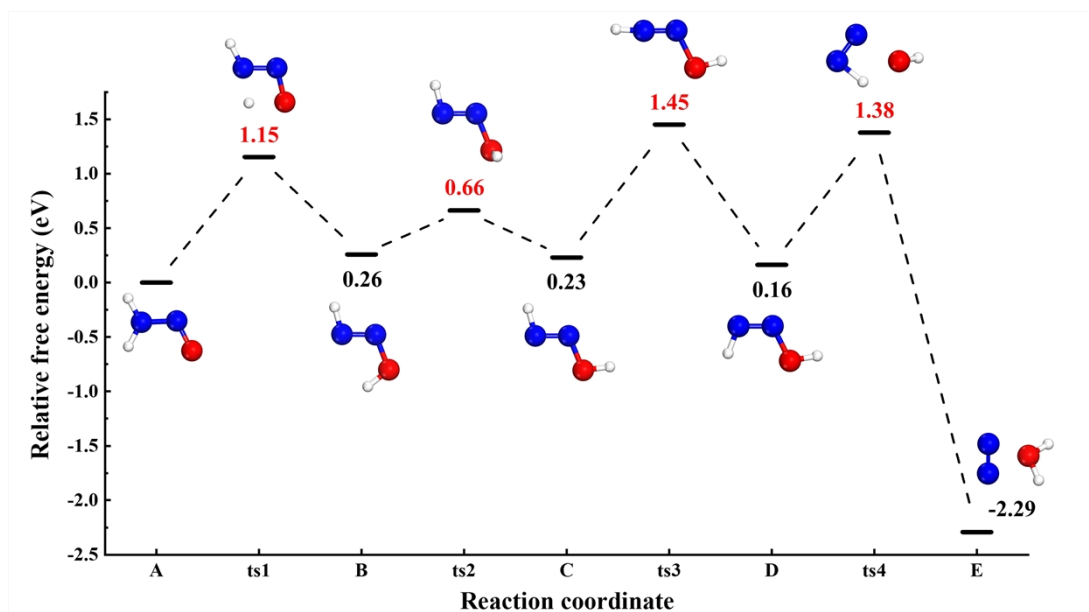

**Figure S8.** Gibbs free energy profile for the self-decomposition of  $\text{NH}_2\text{NO}$  in the CHA cage. The structures of all elementary steps are presented as insets. The zeolite framework is not shown for clarity. All legends are the same as those in Figure S2.

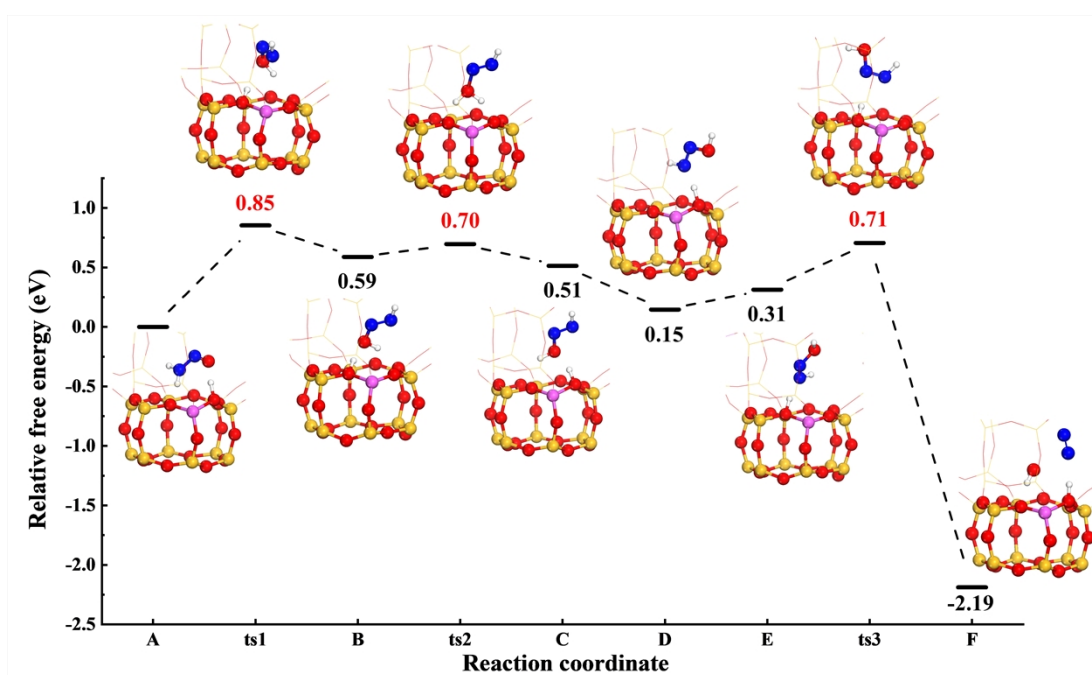

**Figure S9.** Gibbs free energy profile of  $\text{NH}_2\text{NO}$  decomposition with the assistance of Brønsted acid sites. The structures of all elementary steps are presented as insets. All legends are the same as those in Figure S2.

**Table S1.** Ground-state spin multiplicity of gas molecules

| Molecules        | Spin multiplicity |
|------------------|-------------------|
| NO               | 2                 |
| NH <sub>3</sub>  | 1                 |
| O <sub>2</sub>   | 3                 |
| H <sub>2</sub> O | 1                 |

**Table S2.** Comparison of adsorption free energies for different reactants on Cu-OH site<sup>a</sup>

| Adsorption order | Reactant         | Adsorption energy/eV <sup>b</sup> |
|------------------|------------------|-----------------------------------|
| 1                | NH <sub>3</sub>  | -0.58                             |
|                  | NO               | -0.04                             |
|                  | O <sub>2</sub>   | 0.41                              |
|                  | H <sub>2</sub> O | 0.14                              |
| 2                | NH <sub>3</sub>  | -0.64                             |
|                  | NO               | -0.10                             |
|                  | O <sub>2</sub>   | 0.29                              |
|                  | H <sub>2</sub> O | -0.10                             |
| 3                | NH <sub>3</sub>  | -0.25                             |
|                  | NO               | 0.26                              |
|                  | O <sub>2</sub>   | 0.65                              |
|                  | H <sub>2</sub> O | -0.05                             |

<sup>a</sup> When adsorbing the second or third ligands, the adsorption is on the basis of the structure with the lowest adsorption energy in the last adsorption.

<sup>b</sup> The adsorption free energy ( $E_{ad}$ ) was calculated according to

$$E_{ad} = E_{zeolite + adsorbate} - E_{zeolite} - E_{adsorbate}$$

where  $E_{zeolite+adsorbate}$ ,  $E_{zeolite}$ , and  $E_{adsorbate}$  are the Gibbs free energies of the adsorption complex, the zeolite, and the adsorbate in the gas phase, respectively.

**Table S3.** Electronic energies (E) and Gibbs free energies (G) for cycle I, II, III and gas-phase species. The Gibbs free energies are evaluated at 150°C.

|                  | Reactant species |               |        |               | Step | Cycle I  |               |          |               |
|------------------|------------------|---------------|--------|---------------|------|----------|---------------|----------|---------------|
|                  | E/eV             | $\Delta E/eV$ | G/eV   | $\Delta G/eV$ |      | E/eV     | $\Delta E/eV$ | G/eV     | $\Delta G/eV$ |
| NO               | -12.34           | -             | -12.78 | -             | A    | -648.89  | 0.00          | -641.26  | 0.00          |
| O <sub>2</sub>   | -9.88            | -             | -10.55 | -             | B    | -661.30  | -0.14         | -653.83  | 0.21          |
| NH <sub>3</sub>  | -19.63           | -             | -19.24 | -             | ts1  | -660.89  | 0.41          | -653.32  | 0.71          |
| H <sub>2</sub> O | -14.29           | -             | -14.23 | -             | C    | -662.50  | -2.53         | -654.81  | -1.54         |
|                  |                  |               |        |               | D    | -649.83  | -7.16         | -642.98  | -7.02         |
|                  |                  |               |        |               | E    | -1247.06 | -7.39         | -1234.19 | -6.62         |
|                  |                  |               |        |               | ts2  | -1246.73 | -7.05         | -1233.65 | -6.08         |

| F        | -1247.25 | -7.57         | -1234.21 | -6.64         |           |          |               |          |               |
|----------|----------|---------------|----------|---------------|-----------|----------|---------------|----------|---------------|
| G1       | -1261.04 | -9.03         | -1247.81 | -7.46         |           |          |               |          |               |
| H1       | -1275.05 | -10.70        | -1261.77 | -8.65         |           |          |               |          |               |
| ts3      | -1274.75 | -10.40        | -1261.67 | -8.55         |           |          |               |          |               |
| I1       | -1275.21 | -10.86        | -1262.10 | -8.98         |           |          |               |          |               |
| J1       | -658.14  | -13.12        | -650.57  | -10.52        |           |          |               |          |               |
| ts4      | -656.26  | -11.24        | -648.69  | -8.64         |           |          |               |          |               |
| K1       | -657.63  | -12.11        | -650.02  | -9.42         |           |          |               |          |               |
| L1       | -660.05  | -16.94        | -652.83  | -15.03        |           |          |               |          |               |
| A        | -648.83  | -18.70        | -641.24  | -15.73        |           |          |               |          |               |
| Cycle II |          |               |          |               | Cycle III |          |               |          |               |
| Step     | E/eV     | $\Delta E/eV$ | G/eV     | $\Delta G/eV$ | Step      | E/eV     | $\Delta E/eV$ | G/eV     | $\Delta G/eV$ |
| A        | -648.89  | 0.00          | -641.26  | 0.00          | A         | -648.89  | 0.00          | -641.26  | 0.00          |
| B        | -661.30  | -0.14         | -653.83  | 0.21          | B         | -661.30  | -0.14         | -653.83  | 0.21          |
| ts1      | -660.89  | 0.41          | -653.32  | 0.71          | ts1       | -660.89  | 0.41          | -653.32  | 0.71          |
| C        | -662.50  | -2.53         | -654.81  | -1.54         | C         | -662.50  | -2.53         | -654.81  | -1.54         |
| D        | -649.83  | -7.16         | -642.98  | -7.02         | D         | -649.83  | -7.16         | -642.98  | -7.02         |
| E        | -1247.06 | -7.39         | -1234.19 | -6.62         | E         | -1247.06 | -7.39         | -1234.19 | -6.62         |
| ts2      | -1246.73 | -7.05         | -1233.65 | -6.08         | ts2       | -1246.73 | -7.05         | -1233.65 | -6.08         |
| F        | -1247.25 | -7.57         | -1234.21 | -6.64         | F         | -1247.25 | -7.57         | -1234.21 | -6.64         |
| G1       | -1261.04 | -9.03         | -1247.87 | -7.52         | G3        | -1260.18 | -8.17         | -1247.20 | -6.85         |
| H2       | -1281.30 | -9.66         | -1267.28 | -7.69         | H3        | -1280.35 | -8.71         | -1266.31 | -6.72         |
| ts3      | -1280.14 | -8.50         | -1266.03 | -6.44         | ts3       | -1279.85 | -8.21         | -1265.93 | -6.34         |
| I2       | -1281.77 | -10.14        | -1267.68 | -8.09         | I3        | -1281.62 | -9.99         | -1267.54 | -7.95         |
| J2       | -1284.19 | -12.55        | -1270.13 | -10.54        | J3        | -1284.25 | -12.61        | -1270.13 | -10.54        |
| K2       | -1266.64 | -14.51        | -1253.18 | -11.90        | K3        | -1265.04 | -12.96        | -1251.58 | -10.39        |
| L2       | -1286.68 | -14.92        | -1272.45 | -11.93        | L3        | -1265.60 | -13.53        | -1252.11 | -10.93        |
| ts4      | -1285.62 | -13.86        | -1271.46 | -10.94        | M3        | -1287.98 | -16.28        | -1274.04 | -13.61        |
| M2       | -1287.57 | -15.82        | -1273.23 | -12.71        | N3        | -1256.86 | -17.05        | -1243.23 | -14.19        |
| N2       | -1289.38 | -17.62        | -1275.34 | -14.82        | ts4       | -1256.44 | -16.63        | -1243.06 | -14.02        |
| O2       | -1278.39 | -18.28        | -1264.06 | -15.35        | O3        | -1258.06 | -18.26        | -1244.59 | -15.55        |
| P2       | -1298.66 | -18.92        | -1283.36 | -15.42        | P3        | -1278.39 | -18.91        | -1264.06 | -16.08        |
| ts5      | -1298.08 | -18.35        | -1282.70 | -14.75        | Q3        | -1298.66 | -19.56        | -1283.36 | -16.14        |
| A        | -1298.36 | -18.62        | -1282.92 | -14.97        | ts5       | -1298.08 | -18.98        | -1282.70 | -15.48        |
|          |          |               |          |               | A         | -1298.36 | -19.25        | -1282.92 | -15.70        |

**Table S4.** Electronic energies (E) and Gibbs free energies (G) for the transformation pathways of  $\text{NH}_2\text{NO}$  and HONO intermediates. The Gibbs free energies are evaluated at 150°C.

| Self-decomposition of $\text{NH}_2\text{NO}$ |         |               |         |               | $\text{NH}_2\text{NO}$ decomposition with B acid |         |               |         |               |
|----------------------------------------------|---------|---------------|---------|---------------|--------------------------------------------------|---------|---------------|---------|---------------|
| Step                                         | E/eV    | $\Delta E/eV$ | G/eV    | $\Delta G/eV$ | Step                                             | E/eV    | $\Delta E/eV$ | G/eV    | $\Delta G/eV$ |
| A                                            | -647.85 | 0.00          | -640.81 | 0.00          | A                                                | -648.33 | 0.00          | -641.20 | 0.00          |
| ts1                                          | -646.44 | 1.41          | -639.65 | 1.15          | ts1                                              | -647.52 | 0.81          | -640.34 | 0.85          |
| B                                            | -647.61 | 0.25          | -640.55 | 0.26          | B                                                | -647.94 | 0.39          | -640.61 | 0.59          |



| ts2                                                    | -647.42 | 0.73  | -640.31 | 0.66  | ts2                             | -647.52 | 0.81  | -640.50 | 0.70  |
|--------------------------------------------------------|---------|-------|---------|-------|---------------------------------|---------|-------|---------|-------|
| C                                                      | -647.95 | 0.20  | -640.74 | 0.23  | C                               | -647.84 | 0.48  | -640.68 | 0.51  |
| ts3                                                    | -646.55 | 1.60  | -639.52 | 1.45  | D                               | -648.15 | 0.18  | -641.05 | 0.15  |
| D                                                      | -647.93 | 0.22  | -640.81 | 0.16  | E                               | -648.08 | 0.24  | -640.88 | 0.31  |
| ts4                                                    | -646.57 | 1.66  | -639.70 | 1.38  | ts4                             | -647.64 | 0.69  | -640.49 | 0.71  |
| E                                                      | -650.24 | -2.01 | -643.37 | -2.29 | F                               | -650.31 | -1.98 | -643.39 | -2.19 |
| NH <sub>2</sub> NO decomposition with B acid and Cu-OH |         |       |         |       | HONO transformation with B acid |         |       |         |       |
| Step                                                   | E/eV    | ΔE/eV | G/eV    | ΔG/eV | Step                            | E/eV    | ΔE/eV | G/eV    | ΔG/eV |
| A                                                      | -616.25 | 0.00  | -610.57 | 0.00  | A                               | -642.27 | 0.00  | -635.41 | 0.00  |
| ts1                                                    | -615.90 | 0.36  | -610.38 | 0.19  | B                               | -642.06 | 0.21  | -635.31 | 0.10  |
| B                                                      | -615.90 | 0.35  | -610.39 | 0.18  | C                               | -647.85 | -0.95 | -640.77 | -0.64 |
| C                                                      | -615.70 | 0.55  | -610.32 | 0.24  | ts                              | -647.73 | -0.83 | -640.65 | -0.52 |
| ts2                                                    | -615.63 | 0.63  | -610.24 | 0.32  | D                               | -647.91 | -1.00 | -640.91 | -0.78 |
| D                                                      | -618.70 | -2.44 | -613.24 | -2.67 |                                 |         |       |         |       |

**Table S5.** Cartesian coordinates of the reactant complex (RC), transition state (TS), intermediate (IM), and product complex (PC) for cycle I.

| Structure A |              |             | Structure B |    |              | ts1         |             |    |              |             |             |
|-------------|--------------|-------------|-------------|----|--------------|-------------|-------------|----|--------------|-------------|-------------|
| Si          | -0.028297722 | 2.758152962 | 8.151423454 | Si | -0.029726028 | 2.756790876 | 8.149905205 | Si | -0.035175025 | 2.754082203 | 8.143242836 |
| Si          | 7.703778744  | 1.007079482 | 3.117919445 | Si | 7.703464985  | 1.007366896 | 3.118304968 | Si | 7.705681324  | 1.007878661 | 3.118867397 |
| Si          | 2.240016699  | 8.486470222 | 0.895689309 | Si | 2.239417076  | 8.486422539 | 0.895544589 | Si | 2.237642050  | 8.483605385 | 0.890744448 |
| Si          | 5.333650589  | 8.668211937 | 1.249793768 | Si | 5.332723618  | 8.668834686 | 1.251062036 | Si | 5.330864906  | 8.657846451 | 1.246812344 |
| Si          | 7.722766399  | 0.954755902 | 6.256845951 | Si | 7.722712994  | 0.953097522 | 6.257001400 | Si | 7.706669807  | 0.947243333 | 6.250041485 |
| Si          | -0.073300302 | 5.934364796 | 8.352061272 | Si | -0.074040890 | 5.933443069 | 8.354169846 | Si | -0.075961471 | 5.931731701 | 8.348664284 |
| Si          | -0.017412663 | 8.237659454 | 6.252862453 | Si | -0.017677903 | 8.235490799 | 6.253303528 | Si | -0.018914312 | 8.231376648 | 6.245858192 |
| Si          | 5.447589874  | 0.716152489 | 8.395402908 | Si | 5.446925163  | 0.714873970 | 8.395470619 | Si | 5.439025879  | 0.718799174 | 8.392709732 |
| Si          | 2.312567711  | 0.663371742 | 8.179399490 | Si | 2.311973333  | 0.662996829 | 8.178683281 | Si | 2.307134628  | 0.656591535 | 8.168780327 |
| Si          | -0.034654617 | 8.265520096 | 3.132427692 | Si | -0.034803003 | 8.262008667 | 3.132460117 | Si | -0.036265045 | 8.254689217 | 3.123343945 |
| Si          | 7.836153984  | 3.294283628 | 0.986540854 | Si | 7.831700802  | 3.296249866 | 0.987968385 | Si | 7.842007637  | 3.281250000 | 0.968411922 |
| Si          | 9.382879257  | 2.802717209 | 8.182695389 | Si | 9.380640984  | 2.801840782 | 8.184583664 | Si | 9.371917725  | 2.790520906 | 8.174399376 |
| Si          | 17.072635651 | 0.959131062 | 3.081121683 | Si | 17.072164536 | 0.957785606 | 3.080664158 | Si | 17.070426941 | 0.949506700 | 3.070237398 |
| Si          | 11.610020638 | 8.525442123 | 0.895436883 | Si | 11.606787682 | 8.526420593 | 0.898474097 | Si | 11.602599144 | 8.525306702 | 0.887670875 |
| Si          | 14.700273514 | 8.624283791 | 1.165774584 | Si | 14.696202278 | 8.622453690 | 1.168063760 | Si | 14.697489738 | 8.617797852 | 1.157442927 |
| Si          | 17.158870697 | 0.944022834 | 6.232077599 | Si | 17.158798218 | 0.942618251 | 6.231687546 | Si | 17.156425476 | 0.938720942 | 6.224454403 |
| Si          | 9.240896225  | 5.940318108 | 8.313284874 | Si | 9.239109993  | 5.940173149 | 8.315531731 | Si | 9.232294083  | 5.944304943 | 8.304066658 |
| Si          | 9.383009911  | 8.245381355 | 6.194309711 | Si | 9.379977226  | 8.241434097 | 6.194568157 | Si | 9.375052452  | 8.242195129 | 6.181064129 |
| Si          | 14.819309235 | 0.737580776 | 8.356811523 | Si | 14.816211700 | 0.730631530 | 8.356814384 | Si | 14.816907883 | 0.727166235 | 8.352415085 |
| Si          | 11.718410492 | 0.679169416 | 8.115897179 | Si | 11.715466499 | 0.677481234 | 8.115482330 | Si | 11.711750031 | 0.677067935 | 8.102153778 |
| Si          | 9.377953529  | 8.236913681 | 3.069099903 | Si | 9.377391815  | 8.237329483 | 3.070527792 | Si | 9.375853539  | 8.242964745 | 3.058042288 |
| Si          | 17.235275269 | 3.230849504 | 0.937731564 | Si | 17.230686188 | 3.226961851 | 0.936152458 | Si | 17.227006912 | 3.222273111 | 0.932296276 |
| Al          | 7.680119514  | 6.443420887 | 1.157969952 | Al | 7.679252148  | 6.445194244 | 1.161682963 | Al | 7.682808876  | 6.461930752 | 1.125080824 |
| Al          | 17.046363831 | 6.410267353 | 1.059174299 | Al | 17.043031693 | 6.408944607 | 1.059118390 | Al | 17.043113708 | 6.402755260 | 1.051837206 |
| O           | 1.421663523  | 2.026816845 | 8.229351044 | O  | 1.421237111  | 2.026721716 | 8.229400635 | O  | 1.413040161  | 2.017933607 | 8.221134186 |

|   |              |             |             |   |              |             |             |   |              |             |             |
|---|--------------|-------------|-------------|---|--------------|-------------|-------------|---|--------------|-------------|-------------|
| O | 18.393110275 | 0.009952769 | 2.900413752 | O | 18.391235352 | 0.005803809 | 2.901173830 | O | 18.385282516 | 0.006986216 | 2.886759281 |
| O | 8.031728745  | 2.396239758 | 2.343765259 | O | 8.029395103  | 2.398169518 | 2.344977617 | O | 7.986664772  | 2.400135279 | 2.337935686 |
| O | 2.709106684  | 0.536208928 | 0.165559947 | O | 2.709568739  | 0.536147594 | 0.165095970 | O | 2.703093290  | 0.528634608 | 0.153277382 |
| O | 1.238818288  | 8.466297150 | 2.195789337 | O | 1.238760710  | 8.466366768 | 2.196044683 | O | 1.239334226  | 8.465112686 | 2.192356348 |
| O | -0.184289724 | 3.129253626 | 0.131464064 | O | -0.191280454 | 3.126071692 | 0.125479177 | O | -0.196599424 | 3.122029066 | 0.118839562 |
| O | 6.225518227  | 7.358359814 | 1.308751106 | O | 6.223078728  | 7.358628750 | 1.317366123 | O | 6.204253674  | 7.334271908 | 1.288806915 |
| O | 8.644580841  | 0.391506732 | 6.361008167 | O | 8.642842293  | 0.393604457 | 6.361337662 | O | 8.638611794  | 0.394723713 | 6.351188660 |
| O | 6.303020477  | 0.655949056 | 7.004187107 | O | 6.302284718  | 0.655115545 | 7.004567146 | O | 6.293451309  | 0.639834046 | 7.003153324 |
| O | 7.805616856  | 6.004161835 | 8.996222496 | O | 7.803557396  | 6.006106853 | 8.998807907 | O | 7.787387371  | 6.048413754 | 8.961050034 |
| O | -0.091867030 | 6.768632412 | 6.934632301 | O | -0.092379570 | 6.766379833 | 6.935735226 | O | -0.097092390 | 6.763628960 | 6.929662704 |
| O | 5.517845154  | 0.710864305 | 9.167399406 | O | 5.517076969  | 0.712674439 | 9.167206764 | O | 5.512294769  | 0.702401400 | 9.174270630 |
| O | 1.162952900  | 6.513711929 | 9.262027740 | O | 1.164280057  | 6.513066292 | 9.261600494 | O | 1.162624359  | 6.510019302 | 9.257102013 |
| O | 17.975839615 | 2.216856480 | 6.845140457 | O | 17.978181839 | 2.216004133 | 6.841602802 | O | 17.971176147 | 2.215082169 | 6.834159851 |
| O | 6.377321243  | 0.317837358 | 2.473839045 | O | 6.376366138  | 0.318951428 | 2.473620653 | O | 6.398391247  | 0.281180263 | 2.478596449 |
| O | 6.041357517  | 1.885207891 | 9.350538254 | O | 6.038777351  | 1.883813858 | 9.351661682 | O | 6.027444839  | 1.909284949 | 9.325904846 |
| O | 18.031360626 | 6.819167137 | 2.645239592 | O | 18.037195206 | 6.813067436 | 2.641967535 | O | 18.046457291 | 6.802798271 | 2.628103256 |
| O | 1.840780020  | 0.232429475 | 6.889398575 | O | 1.840700626  | 0.233932436 | 6.889379501 | O | 1.846362829  | 0.242834389 | 6.876411915 |
| O | 0.353634834  | 8.005980492 | 4.670880795 | O | 0.353895396  | 8.002192497 | 4.671162128 | O | 0.347901881  | 7.996301174 | 4.663043022 |
| O | 3.880999565  | 1.044545174 | 8.033178329 | O | 3.880537271  | 1.044359922 | 8.033326149 | O | 3.873367071  | 1.044819593 | 8.027157784 |
| O | 7.388134480  | 4.755484104 | 1.412033319 | O | 7.378810883  | 4.756982803 | 1.413182855 | O | 7.456199169  | 4.763882637 | 1.386128426 |
| O | 7.439861298  | 1.327987671 | 4.697875977 | O | 7.440929890  | 1.329912782 | 4.698017120 | O | 7.413079739  | 1.311375499 | 4.694895744 |
| O | 3.742074251  | 8.308362007 | 1.434511900 | O | 3.741570950  | 8.308055878 | 1.434725285 | O | 3.737864971  | 8.309566498 | 1.434395790 |
| O | 0.200490177  | 4.358762741 | 8.003448486 | O | 0.200260162  | 4.357779503 | 8.005804062 | O | 0.200103402  | 4.355557919 | 8.002902031 |
| O | 10.826325417 | 2.027904987 | 8.268493652 | O | 10.824960709 | 2.027392387 | 8.269462585 | O | 10.831989288 | 2.037556648 | 8.214969635 |
| O | 8.992518425  | 0.037125856 | 2.931237221 | O | 8.991059303  | 0.036988825 | 2.931042194 | O | 9.013111115  | 0.062869757 | 2.934937000 |
| O | 17.371429443 | 2.348337412 | 2.308375597 | O | 17.372587204 | 2.348015785 | 2.309297323 | O | 17.370908737 | 2.343850136 | 2.305901527 |
| O | 12.246270180 | 0.580765009 | 0.145274043 | O | 12.246311188 | 0.580495656 | 0.145817846 | O | 12.228462219 | 0.577730179 | 0.126058608 |
| O | 10.751324654 | 8.697121620 | 2.272518635 | O | 10.748757362 | 8.705576897 | 2.274878740 | O | 10.762123108 | 8.681215286 | 2.274903774 |
| O | 9.322198868  | 3.300861835 | 0.248590574 | O | 9.317598343  | 3.302698851 | 0.250197172 | O | 9.324139595  | 3.226590872 | 0.230838120 |
| O | 15.604740143 | 7.311442852 | 1.195831895 | O | 15.602705002 | 7.311000824 | 1.203552008 | O | 15.605561256 | 7.308444023 | 1.198513389 |
| O | 18.064098358 | 0.411576450 | 6.345840454 | O | 18.064628601 | 0.412912220 | 6.345626831 | O | 18.065292358 | 0.413739890 | 6.345601559 |
| O | 15.756542206 | 0.702464700 | 7.022362232 | O | 15.757191658 | 0.702471197 | 7.023921967 | O | 15.754814148 | 0.702973902 | 7.018169403 |
| O | 17.375257492 | 6.134076118 | 9.126413345 | O | 17.375745773 | 6.135022640 | 9.129495621 | O | 17.372671127 | 6.133711338 | 9.121708870 |
| O | 9.311693192  | 6.769769669 | 6.891219616 | O | 9.311903000  | 6.767284393 | 6.893330097 | O | 9.323027611  | 6.768810749 | 6.879198074 |
| O | 14.876616478 | 0.704938233 | 9.113392830 | O | 14.873529434 | 0.713557899 | 9.111235619 | O | 14.876395226 | 0.717072904 | 9.103639603 |
| O | 10.402011871 | 6.583588123 | 9.303068161 | O | 10.400543213 | 6.583484173 | 9.305901527 | O | 10.395262718 | 6.581923485 | 9.295671463 |
| O | 8.449985504  | 2.229073048 | 6.978431702 | O | 8.448522568  | 2.227753878 | 6.979631901 | O | 8.442857742  | 2.220560074 | 6.963483810 |
| O | 15.771972656 | 0.226582199 | 2.427582979 | O | 15.770536423 | 0.227876067 | 2.426562786 | O | 15.766305923 | 0.227341354 | 2.413231373 |
| O | 16.024089813 | 2.644974232 | 0.004220694 | O | 16.016765594 | 2.634074211 | 0.010446309 | O | 16.010797501 | 2.628791332 | 0.010679962 |
| O | 8.842514992  | 6.848793030 | 2.459388971 | O | 8.848960876  | 6.849151134 | 2.455578089 | O | 8.829913139  | 6.868849754 | 2.432406664 |
| O | 11.264675140 | 0.259845853 | 6.872484684 | O | 11.260712624 | 0.261402160 | 6.873441696 | O | 11.247925758 | 0.233422369 | 6.838896751 |
| O | 9.789408684  | 8.024812698 | 4.636964798 | O | 9.788436890  | 8.022651672 | 4.637753010 | O | 9.780417442  | 8.013684273 | 4.626341343 |
| O | 13.288208008 | 1.082437396 | 7.909583092 | O | 13.286472321 | 1.076220870 | 7.906475067 | O | 13.284971237 | 1.068397045 | 7.904020309 |
| O | 16.887619019 | 4.730539322 | 1.367221475 | O | 16.882642746 | 4.728168964 | 1.358731270 | O | 16.879388809 | 4.722977161 | 1.353905082 |

|                    |              |             |             |                    |              |             |             |                    |              |             |             |
|--------------------|--------------|-------------|-------------|--------------------|--------------|-------------|-------------|--------------------|--------------|-------------|-------------|
| O                  | 16.816581726 | 1.251566648 | 4.662368298 | O                  | 16.816610336 | 1.249222755 | 4.661971569 | O                  | 16.812313080 | 1.233496785 | 4.652595520 |
| O                  | 13.137218475 | 8.196124077 | 1.348745227 | O                  | 13.133272171 | 8.195259094 | 1.355642557 | O                  | 13.133339882 | 8.193893433 | 1.330271721 |
| O                  | 9.703917503  | 4.392506123 | 7.965420246 | O                  | 9.701106071  | 4.391911030 | 7.967994213 | O                  | 9.669356346  | 4.386172295 | 7.995685577 |
| O                  | 10.715300560 | 2.217634201 | 4.928231716 | O                  | 10.716895103 | 2.219249964 | 4.925456524 | O                  | 10.481261253 | 2.517775774 | 4.749813557 |
| Cu                 | 10.924994469 | 3.522078991 | 3.617620945 | O                  | 5.600300312  | 4.970973015 | 4.614342213 | O                  | 5.828547955  | 4.442234039 | 4.750952721 |
| H                  | 11.400354385 | 1.527613640 | 4.914074421 | Cu                 | 10.934362411 | 3.527806520 | 3.616623640 | Cu                 | 11.234521866 | 3.547767878 | 3.436433554 |
| H                  | 9.553892136  | 4.947646141 | 5.301989079 | H                  | 11.399142265 | 1.526903152 | 4.908138752 | H                  | 11.079216003 | 1.889014006 | 5.186916351 |
| H                  | 8.795764923  | 5.081796169 | 3.836091280 | H                  | 9.554700851  | 4.930125237 | 5.314408779 | H                  | 9.057832718  | 5.302627563 | 5.175220013 |
| H                  | 8.697529793  | 3.668307781 | 4.719500065 | H                  | 8.814937592  | 5.103212357 | 3.844578028 | H                  | 8.474986076  | 4.985385418 | 3.620271444 |
| H                  | -0.648833036 | 6.031774521 | 3.196260929 | H                  | 8.702120781  | 3.667891741 | 4.691033363 | H                  | 8.764155388  | 3.702010155 | 4.720715523 |
| H                  | 12.758908272 | 2.756601572 | 1.805489898 | H                  | -0.650041938 | 6.028357983 | 3.198953867 | H                  | -0.649313688 | 6.019594669 | 3.189280510 |
| H                  | 13.216477394 | 2.314361811 | 3.324046850 | H                  | 12.770790100 | 2.770766973 | 1.804086447 | H                  | 12.892825127 | 2.255477905 | 1.728036523 |
| H                  | 12.022428513 | 1.490703225 | 2.547176600 | H                  | 13.224000931 | 2.318858624 | 3.321048260 | H                  | 13.575525284 | 2.241645813 | 3.230369806 |
| H                  | 10.401289940 | 5.716916561 | 2.347148657 | H                  | 12.030405998 | 1.501296401 | 2.536509037 | H                  | 12.265039444 | 1.294949412 | 2.892577648 |
| H                  | 12.035968781 | 5.671941757 | 2.592601299 | H                  | 10.403994560 | 5.720499992 | 2.343713284 | H                  | 10.432456017 | 5.714526653 | 2.374055624 |
| H                  | 11.364846230 | 4.802727222 | 1.378221631 | H                  | 12.037883759 | 5.683445930 | 2.591647863 | H                  | 12.041882515 | 5.850547791 | 2.683535576 |
| N                  | 9.311678886  | 4.438929081 | 4.446965694 | H                  | 11.373424530 | 4.811909676 | 1.375890255 | H                  | 11.536209106 | 5.023388863 | 1.371727109 |
| N                  | 12.408258438 | 2.428037882 | 2.707810402 | N                  | 9.321875572  | 4.442685127 | 4.444563866 | N                  | 8.487634659  | 4.684779167 | 4.597192764 |
| N                  | 11.227517128 | 5.091994286 | 2.349567652 | N                  | 12.417560577 | 2.436878443 | 2.703476906 | N                  | 12.686305046 | 2.215301514 | 2.727612734 |
|                    |              |             |             | N                  | 11.232964516 | 5.099125385 | 2.347425222 | N                  | 11.327293396 | 5.192405701 | 2.359288931 |
|                    |              |             |             | N                  | 6.398926258  | 5.818571091 | 4.703770638 | N                  | 6.615675926  | 5.202557564 | 5.148523808 |
| <b>Structure C</b> |              |             |             | <b>Structure D</b> |              |             |             | <b>Structure E</b> |              |             |             |
| Si                 | 0.029900193  | 2.781871796 | 8.128196716 | Si                 | 0.088493943  | 2.789028883 | 8.063394547 | Si                 | 0.103443980  | 2.598400831 | 8.283793449 |
| Si                 | 7.804318905  | 0.997146428 | 3.039706230 | Si                 | 7.856783867  | 1.028435230 | 2.966660023 | Si                 | 7.922797203  | 0.800539851 | 3.217981577 |
| Si                 | 2.303669691  | 8.502574921 | 0.855787933 | Si                 | 2.368878365  | 8.517913818 | 0.796009600 | Si                 | 2.394852638  | 8.317947388 | 1.019172430 |
| Si                 | 5.392069817  | 8.612658501 | 1.102147698 | Si                 | 5.459936142  | 8.635662079 | 1.044549942 | Si                 | 5.516014576  | 8.429636002 | 1.256062984 |
| Si                 | 7.784955978  | 0.907568812 | 6.163419724 | Si                 | 7.841373444  | 0.947546005 | 6.089056492 | Si                 | 7.879184723  | 0.754233062 | 6.336932659 |
| Si                 | -0.018209338 | 5.943210125 | 8.315381050 | Si                 | 0.035069227  | 5.955694199 | 8.264754295 | Si                 | 0.064849377  | 5.779713631 | 8.441279411 |
| Si                 | 0.020732254  | 8.252941132 | 6.210952282 | Si                 | 0.082627982  | 8.248436928 | 6.161039829 | Si                 | 0.122846663  | 8.068790436 | 6.310264587 |
| Si                 | 5.482818604  | 0.708108604 | 8.294873238 | Si                 | 5.543549061  | 0.694792151 | 8.231410980 | Si                 | 5.576695442  | 0.571571827 | 8.498324394 |
| Si                 | 2.365638971  | 0.683735669 | 8.117897987 | Si                 | 2.428148746  | 0.683794379 | 8.059189796 | Si                 | 2.425246239  | 0.484360099 | 8.297241211 |
| Si                 | 0.035294235  | 8.288537979 | 3.087779284 | Si                 | 0.106378451  | 8.291355133 | 3.038975239 | Si                 | 0.118214175  | 8.161410332 | 3.226610422 |
| Si                 | 7.876792431  | 3.274971247 | 0.882444620 | Si                 | 7.923561096  | 3.274873495 | 0.817738831 | Si                 | 7.917699337  | 3.133920431 | 1.057207108 |
| Si                 | 9.445979118  | 2.764671087 | 8.110436440 | Si                 | 9.505723000  | 2.794466972 | 8.027739525 | Si                 | 9.522748947  | 2.568040371 | 8.288021088 |
| Si                 | 17.150163651 | 0.986238599 | 3.057600975 | Si                 | 17.214017868 | 0.984745800 | 2.995972395 | Si                 | 17.370719910 | 0.856781542 | 3.221522570 |
| Si                 | 11.677577019 | 8.455774307 | 0.828654170 | Si                 | 11.714137077 | 8.505520821 | 0.783654273 | Si                 | 11.762069702 | 8.302596092 | 1.056973100 |
| Si                 | 14.767663002 | 8.655743599 | 1.158236623 | Si                 | 14.839547157 | 8.670214653 | 1.082170963 | Si                 | 14.877284050 | 8.518784523 | 1.276082397 |
| Si                 | 17.206672668 | 0.951356530 | 6.207890511 | Si                 | 17.273336411 | 0.966390252 | 6.145413876 | Si                 | 17.296205521 | 0.757620811 | 6.325635433 |
| Si                 | 9.394819260  | 5.929742336 | 8.267280579 | Si                 | 9.406698227  | 5.943984509 | 8.207329750 | Si                 | 9.495631218  | 5.741111279 | 8.491332054 |
| Si                 | 9.449309349  | 8.221694946 | 6.133737564 | Si                 | 9.506147385  | 8.257603645 | 6.068798065 | Si                 | 9.511697769  | 8.024484634 | 6.342342377 |
| Si                 | 14.875708580 | 0.750123501 | 8.330457687 | Si                 | 14.952070236 | 0.779672205 | 8.272455215 | Si                 | 14.973167419 | 0.542259097 | 8.442524910 |
| Si                 | 11.747802734 | 0.659275591 | 8.110320091 | Si                 | 11.810238838 | 0.689092994 | 8.022891998 | Si                 | 11.831549644 | 0.451329768 | 8.288577080 |
| Si                 | 9.391213417  | 8.230119705 | 3.033702135 | Si                 | 9.484243393  | 8.236116409 | 2.965137482 | Si                 | 9.515642166  | 8.124712944 | 3.243047237 |
| Si                 | 17.278350830 | 3.265042305 | 0.905071199 | Si                 | 17.347833633 | 3.275899172 | 0.845613778 | Si                 | 17.329345703 | 3.132835150 | 1.036930561 |

|    |              |              |             |    |              |              |             |    |              |              |              |
|----|--------------|--------------|-------------|----|--------------|--------------|-------------|----|--------------|--------------|--------------|
| Al | 7.723313808  | 6.462466240  | 1.060659647 | Al | 7.800745487  | 6.455641747  | 1.021685958 | Si | -0.590847552 | 1.866508603  | 17.650913239 |
| Al | 17.094005585 | 6.425334454  | 1.020284176 | Al | 17.155876160 | 6.438167572  | 0.972688854 | Si | 7.240097523  | 0.048296750  | 12.588292122 |
| O  | 1.474263310  | 2.043879747  | 8.219047546 | O  | 1.531531096  | 2.043489456  | 8.122222900 | Si | 1.703048110  | 7.561120033  | 10.388338089 |
| O  | 18.473268509 | 0.045809314  | 2.869754314 | O  | 18.537441254 | 0.045331180  | 2.818430662 | Si | 4.839676380  | 7.674850464  | 10.651304245 |
| O  | 8.013901711  | 2.434813261  | 2.297063112 | O  | 8.145223618  | 2.444249392  | 2.214601278 | Si | 7.199184418  | 0.005538702  | 15.717638969 |
| O  | 2.793022394  | 0.538094223  | 0.096823633 | O  | 2.848926306  | 0.565056443  | 0.055493988 | Si | -0.603231788 | 5.037919998  | 17.820571899 |
| O  | 1.315354347  | 8.518439293  | 2.168212891 | O  | 1.383101463  | 8.514847755  | 2.111214876 | Si | -0.547788560 | 7.331662178  | 15.689272881 |
| O  | -0.130334809 | 3.191429138  | 0.114880875 | O  | -0.063891500 | 3.189123631  | 0.054031800 | Si | 4.871495247  | -0.129451394 | 17.831502914 |
| O  | 6.181468964  | 7.245570660  | 1.034604430 | O  | 6.290740967  | 7.291400909  | 1.039342284 | Si | 1.745564580  | -0.236337185 | 17.637390137 |
| O  | 8.672338486  | -0.471780509 | 6.222961903 | O  | 8.736450195  | -0.425618529 | 6.172063351 | Si | -0.564061880 | 7.375542641  | 12.604829788 |
| O  | 6.372809410  | 0.650337279  | 6.931296349 | O  | 6.444426537  | 0.690676272  | 6.876168251 | Si | 7.244984627  | 2.354975462  | 10.438284874 |
| O  | 8.038319588  | 6.153359413  | 9.067080498 | O  | 7.960000992  | 6.064208508  | 8.872931480 | Si | 8.842542648  | 1.845905304  | 17.684421539 |
| O  | -0.032800615 | 6.793712616  | 6.909175396 | O  | -0.003604174 | 6.786446095  | 6.848771572 | Si | 16.697032928 | 0.095981300  | 12.593231201 |
| O  | 4.822567463  | 8.660598755  | 9.036255836 | O  | 4.880868912  | 8.632983208  | 8.943828583 | Si | 11.083312988 | 7.531321526  | 10.393725395 |
| O  | 1.202232957  | 6.514676094  | 9.250593185 | O  | 1.267627239  | 6.538713455  | 9.177541733 | Si | 14.180154800 | 7.765340328  | 10.634213448 |
| O  | 18.024793625 | 2.210265398  | 6.838358879 | O  | 18.067699432 | 2.240617514  | 6.773567677 | Si | 16.611774445 | 0.014933228  | 15.702773094 |
| O  | 6.593291759  | 0.179556474  | 2.337502480 | O  | 6.624074459  | 0.264005542  | 2.241774321 | Si | 8.769863129  | 5.007081032  | 17.827133179 |
| O  | 6.067154884  | 1.838546753  | 9.291241646 | O  | 6.106280804  | 1.808573961  | 9.260547638 | Si | 8.859681129  | 7.310242653  | 15.707915306 |
| O  | 18.118488312 | 6.841592312  | 2.577928543 | O  | -0.664470851 | 6.851477146  | 2.528120756 | Si | 14.290815353 | -0.160608649 | 17.817377090 |
| O  | 1.863950610  | -0.187162578 | 6.823769569 | O  | 1.940837383  | -0.215997964 | 6.780993938 | Si | 11.151473045 | -0.252732635 | 17.681180954 |
| O  | 0.387554109  | 8.007293701  | 4.629919052 | O  | 0.454634964  | 8.005962372  | 4.582523823 | Si | 8.818206787  | 7.317611694  | 12.613140106 |
| O  | 3.925934553  | 1.060533404  | 7.913859844 | O  | 3.989172459  | 1.065363288  | 7.859071732 | Si | 16.649700165 | 2.359005928  | 10.406849861 |
| O  | 7.487797737  | 4.763030052  | 1.228821635 | O  | 7.489395618  | 4.759511471  | 1.128982186 | Al | 7.819621563  | 6.321098804  | 1.244905353  |
| O  | 7.452307224  | 1.269999385  | 4.610695839 | O  | 7.512917042  | 1.307518125  | 4.538617611 | Al | 17.377412796 | 6.282257080  | 1.277327538  |
| O  | 3.801175594  | 8.331751823  | 1.404399157 | O  | 3.871024609  | 8.336275101  | 1.323687196 | Al | 7.162600517  | 5.538650990  | 10.692020416 |
| O  | 0.275531650  | 4.377082825  | 7.939350605 | O  | 0.324845791  | 4.386440754  | 7.899493694 | Al | 16.669668198 | 5.513888359  | 10.633930206 |
| O  | 10.925667763 | 2.053072691  | 8.244321823 | O  | 10.984666824 | 2.080337048  | 8.167609215 | O  | 1.568727255  | 1.875970006  | 8.417930603  |
| O  | 9.234436035  | 0.227016449  | 2.931984186 | O  | 9.244063377  | 0.178613216  | 2.887180567 | O  | 0.005456865  | 0.197659492  | 3.167180538  |
| O  | 17.423416138 | 2.362725496  | 2.263093710 | O  | 17.479091644 | 2.359693050  | 2.194895267 | O  | 7.929905415  | 2.182394028  | 2.372874737  |
| O  | 12.234210014 | 0.529471636  | 0.107559055 | O  | 11.570380211 | -0.203212380 | 9.362278938 | O  | 2.879973650  | 0.349009722  | 0.235179305  |
| O  | 10.750994682 | 8.456944466  | 2.154468775 | O  | 10.866440773 | 8.622508049  | 2.157258034 | O  | 1.465752006  | 8.329364777  | 2.340161562  |
| O  | 9.361030579  | 3.180081367  | 0.148047805 | O  | 9.404646873  | 3.202002048  | 0.055008385 | O  | -0.051892072 | 3.044044256  | 0.281688690  |
| O  | 15.667821884 | 7.343873978  | 1.184939981 | O  | 15.715224266 | 7.341986179  | 1.110839128 | O  | 6.231822968  | 7.027831078  | 0.980438828  |
| O  | 18.088737488 | -0.419222027 | 6.310670853 | O  | 18.161338806 | -0.399787247 | 6.263177872 | O  | 8.059016228  | 8.773914337  | 6.475541592  |
| O  | 15.777344704 | 0.720008731  | 6.963026524 | O  | 15.841524124 | 0.741699278  | 6.898333549 | O  | 6.469288349  | 0.563334823  | 7.147469997  |
| O  | 17.419670105 | 6.122102737  | 9.075129509 | O  | 17.478065491 | 6.149192810  | 9.030604362 | O  | 8.146500587  | 5.949120045  | 9.319065094  |
| O  | 9.429973602  | 6.771557808  | 6.853620052 | O  | 9.517429352  | 6.828943253  | 6.831033230 | O  | 0.080774724  | 6.618183136  | 7.044500351  |
| O  | 14.990138054 | -0.669890881 | 9.117084503 | O  | 15.101519585 | -0.631803036 | 9.063898087 | O  | 5.039492130  | 8.552180290  | 9.282899857  |
| O  | 10.670013428 | 6.495123386  | 9.170182228 | O  | 10.590145111 | 6.503916740  | 9.223670959 | O  | 1.306306839  | 6.322719574  | 9.394892693  |
| O  | 8.638703346  | 2.110755444  | 6.858894825 | O  | 8.715103149  | 2.164309025  | 6.751988411 | O  | 18.112285614 | 2.004820824  | 7.010847569  |
| O  | 15.835266113 | 0.240286455  | 2.443654537 | O  | 15.897473335 | 0.230715930  | 2.389042139 | O  | 6.803768158  | -0.188356668 | 2.557863474  |
| O  | 15.401559830 | 1.938971400  | 9.305799484 | O  | 15.457673073 | 1.980155826  | 9.242655754 | O  | 6.019149303  | 1.795622349  | 9.476752281  |
| O  | 8.531538010  | 6.966316223  | 2.568951845 | O  | 8.813408852  | 6.924409389  | 2.376092911 | O  | 18.012975693 | 6.980975628  | 2.702341557  |
| O  | 11.271256447 | -0.198513478 | 6.814121246 | O  | 11.342490196 | -0.139118791 | 6.703734398 | O  | 1.929674387  | -0.374228358 | 7.020348549  |

|    |              |              |             |    |              |              |             |   |              |              |              |
|----|--------------|--------------|-------------|----|--------------|--------------|-------------|---|--------------|--------------|--------------|
| O  | 9.924077988  | 8.055981636  | 4.581178665 | O  | 9.977385521  | 8.049929619  | 4.524474144 | O | 0.562056839  | 7.870166779  | 4.769590855  |
| O  | 13.332166672 | 1.023242235  | 7.878725052 | O  | 13.401604652 | 1.038244963  | 7.833547592 | O | 3.998994350  | 0.840994179  | 8.135990143  |
| O  | 16.905900955 | 4.753177166  | 1.351980209 | O  | 16.997291565 | 4.764349937  | 1.303229809 | O | 7.555608273  | 4.624502659  | 1.434187293  |
| O  | 16.884698868 | 1.274328709  | 4.637007236 | O  | 16.943893433 | 1.278640985  | 4.574491501 | O | 7.521877289  | 1.078436375  | 4.781329155  |
| O  | 13.203227043 | 8.287814140  | 1.373451710 | O  | 13.265026093 | 8.327044487  | 1.237251997 | O | 3.925261021  | 8.166947365  | 1.494975328  |
| O  | 9.706727982  | 4.355297089  | 7.908916950 | O  | 9.781755447  | 4.384881973  | 7.836127758 | O | 0.365934432  | 4.195349693  | 8.114210129  |
| O  | 9.640296936  | 3.874217987  | 4.232099056 | O  | 6.017600060  | 4.357940674  | 7.266106606 | O | 10.982851028 | 1.830561638  | 8.405707359  |
| O  | 6.554717541  | 4.611377716  | 6.372312069 | Cu | 12.240290642 | 2.027232885  | 3.360643148 | O | 9.421508789  | 0.169525385  | 3.173430681  |
| Cu | 12.488297462 | 2.126308680  | 3.308297634 | H  | 6.558901310  | 5.094648838  | 7.615988255 | O | 17.380605698 | 2.252085686  | 2.408370256  |
| H  | 9.048787117  | 4.354374409  | 4.860924721 | H  | 5.491667747  | 4.075664520  | 8.034735680 | O | 12.336364746 | 0.354408890  | 0.306898594  |
| H  | 7.427867889  | 6.253969193  | 3.898499012 | H  | -0.517395973 | 6.065629959  | 3.085869312 | O | 10.929132462 | 8.321471214  | 2.428110361  |
| H  | 5.875002861  | 6.276739120  | 4.836895466 | H  | 12.714947701 | -0.117651299 | 4.377903461 | O | 9.374637604  | 2.997568369  | 0.296725363  |
| H  | 9.000261307  | 3.459098101  | 3.616048336 | H  | 14.103323936 | 0.437898636  | 3.661875725 | O | 15.634222984 | 6.992879868  | 1.111396313  |
| H  | -0.600330353 | 6.067261696  | 3.157372952 | H  | 13.658393860 | 0.987499356  | 5.155946255 | O | 17.500528336 | 8.794415474  | 6.426871777  |
| H  | 12.602232933 | -0.103050843 | 4.317155838 | H  | 10.459469795 | 3.733352423  | 3.104286909 | O | 15.884567261 | 0.504905283  | 7.102112770  |
| H  | 14.103818893 | 0.345621824  | 3.776634932 | H  | 11.760769844 | 4.176143169  | 2.206044912 | O | 17.500579834 | 5.967508793  | 9.195178986  |
| H  | 13.531835556 | 0.910384893  | 5.223562241 | H  | 10.728275299 | 3.020432234  | 1.661504865 | O | 9.469658852  | 6.581656933  | 7.086662292  |
| H  | 11.013215065 | 4.001053333  | 3.074490547 | N  | 6.644966602  | 6.305273056  | 4.782039642 | O | 14.435195923 | 8.487296104  | 9.212718010  |
| H  | 12.341885567 | 4.314019680  | 2.088757753 | N  | 13.298021317 | 0.715461493  | 4.236803532 | O | 10.794180870 | 6.300386429  | 9.372042656  |
| H  | 11.158135414 | 3.287556410  | 1.583465934 | N  | 11.207515717 | 3.368346214  | 2.505252123 | O | 8.718925476  | 2.002502918  | 6.979785919  |
| N  | 6.824027538  | 5.927160740  | 4.670419216 | N  | 5.616082191  | 6.467625141  | 4.388834953 | O | 16.257972717 | -0.150825009 | 2.535358191  |
| N  | 13.263401031 | 0.680369198  | 4.262351990 |    |              |              |             | O | 15.508081436 | 1.694065332  | 9.455292702  |
| N  | 11.698222160 | 3.585485697  | 2.404367924 |    |              |              |             | O | 8.631802559  | 6.953074932  | 2.634254217  |
| N  | 7.305613518  | 4.998450279  | 5.465461731 |    |              |              |             | O | 11.361520767 | -0.430762142 | 7.017233372  |
|    |              |              |             |    |              |              |             | O | 9.924253464  | 7.816081524  | 4.794208050  |
|    |              |              |             |    |              |              |             | O | 13.418384552 | 0.814875424  | 8.090675354  |
|    |              |              |             |    |              |              |             | O | 16.920726776 | 4.634794712  | 1.389381766  |
|    |              |              |             |    |              |              |             | O | 16.943941116 | 1.113077164  | 4.775003433  |
|    |              |              |             |    |              |              |             | O | 13.341905594 | 8.102813721  | 1.491052389  |
|    |              |              |             |    |              |              |             | O | 9.781693459  | 4.163685799  | 8.141051292  |
|    |              |              |             |    |              |              |             | O | 0.869552851  | 1.137289524  | 17.742271423 |
|    |              |              |             |    |              |              |             | O | -0.667989731 | -0.579676628 | 12.543182373 |
|    |              |              |             |    |              |              |             | O | 7.321647644  | 1.445871353  | 11.788598061 |
|    |              |              |             |    |              |              |             | O | 2.157424212  | -0.377319574 | 9.667330742  |
|    |              |              |             |    |              |              |             | O | 0.799349427  | 7.585066319  | 11.736162186 |
|    |              |              |             |    |              |              |             | O | -0.721275866 | 2.291820765  | 9.667831421  |
|    |              |              |             |    |              |              |             | O | 5.558794498  | 6.252296448  | 10.543885231 |
|    |              |              |             |    |              |              |             | O | 7.349668503  | 7.984673977  | 15.814666748 |
|    |              |              |             |    |              |              |             | O | 5.766506195  | -0.229677439 | 16.464099884 |
|    |              |              |             |    |              |              |             | O | 7.334833145  | 5.172314167  | 18.500282288 |
|    |              |              |             |    |              |              |             | O | -0.584985852 | 5.886337280  | 16.419971466 |
|    |              |              |             |    |              |              |             | O | 4.297492504  | 7.872941017  | 18.637067795 |
|    |              |              |             |    |              |              |             | O | 2.020155191  | 7.064175606  | 0.024733795  |
|    |              |              |             |    |              |              |             | O | 17.425317764 | 1.272363544  | 16.359096527 |

|  |  |    |              |              |              |
|--|--|----|--------------|--------------|--------------|
|  |  | O  | 6.041445255  | -0.875554740 | 11.964034081 |
|  |  | O  | 5.376565456  | 1.134490848  | 18.717947006 |
|  |  | O  | 17.351879120 | 6.196054935  | 12.051717758 |
|  |  | O  | 1.279318094  | -1.084131956 | 16.324859619 |
|  |  | O  | -0.122934639 | 7.090904236  | 14.141211510 |
|  |  | O  | 3.310713768  | 0.174362779  | 17.428783417 |
|  |  | O  | 6.863207340  | 3.840884686  | 10.837573051 |
|  |  | O  | 6.876394272  | 0.339967728  | 14.158023834 |
|  |  | O  | 3.236581326  | 7.397729874  | 10.858832359 |
|  |  | O  | -0.319311559 | 3.460107803  | 17.441696167 |
|  |  | O  | 10.307548523 | 1.128341913  | 17.798013687 |
|  |  | O  | 8.693578720  | -0.662245750 | 12.492641449 |
|  |  | O  | 16.804460526 | 1.506851673  | 11.798724174 |
|  |  | O  | 11.643891335 | -0.411017716 | 9.664965630  |
|  |  | O  | 10.174515724 | 7.480918884  | 11.719181061 |
|  |  | O  | 8.662531853  | 2.209764957  | 9.630290031  |
|  |  | O  | 14.926988602 | 6.226560116  | 10.513902664 |
|  |  | O  | 16.828010559 | 8.056115150  | 15.786737442 |
|  |  | O  | 15.196914673 | -0.237789869 | 16.468639374 |
|  |  | O  | 16.827182770 | 5.226246357  | 18.560567856 |
|  |  | O  | 8.813308716  | 5.850802898  | 16.412984848 |
|  |  | O  | 13.762897491 | 7.807005405  | 18.615690231 |
|  |  | O  | 11.367759705 | 7.075146198  | 0.057091448  |
|  |  | O  | 8.038363457  | 1.232547045  | 16.384290695 |
|  |  | O  | 15.589163780 | -0.872790813 | 11.862378120 |
|  |  | O  | 16.177883148 | 2.520501614  | 0.047285683  |
|  |  | O  | 7.898204327  | 6.084501743  | 12.185411453 |
|  |  | O  | 10.641247749 | -1.106467128 | 16.398481369 |
|  |  | O  | 9.290700912  | 7.126047611  | 14.164772034 |
|  |  | O  | 12.731734276 | 0.085447788  | 17.447649002 |
|  |  | O  | 16.223823547 | 3.859730244  | 10.749957085 |
|  |  | O  | 16.259965897 | 0.348310709  | 14.137495041 |
|  |  | O  | 12.648696899 | 7.379157066  | 10.909638405 |
|  |  | O  | 9.094875336  | 3.436594248  | 17.463418961 |
|  |  | O  | 3.290051460  | 3.674630165  | 14.435688019 |
|  |  | O  | 3.277391434  | 4.226616859  | 13.297183990 |
|  |  | Cu | 2.704382896  | 2.965833664  | 11.278738976 |
|  |  | Cu | 4.792230606  | 4.573827744  | 16.084466934 |
|  |  | H  | 14.992492676 | 6.261981010  | 1.017969131  |
|  |  | H  | 0.562126517  | 1.985247970  | 12.089053154 |
|  |  | H  | 1.663304329  | 0.802184045  | 11.895428658 |
|  |  | H  | 1.718308449  | 1.755298018  | 13.240267754 |
|  |  | H  | 3.188430786  | 4.272514820  | 9.271963120  |
|  |  | H  | 4.293913364  | 4.755646706  | 10.401496887 |

|     |              | H            | 4.480247498  | 3.307308197 | 9.652404785  |                          |              |    |              |              |              |
|-----|--------------|--------------|--------------|-------------|--------------|--------------------------|--------------|----|--------------|--------------|--------------|
|     |              | H            | 14.275836945 | 5.503184319 | 10.423684120 |                          |              |    |              |              |              |
|     |              | H            | 4.108915806  | 4.421614170 | 18.415864944 |                          |              |    |              |              |              |
|     |              | H            | 2.943664312  | 3.646354675 | 17.507106781 |                          |              |    |              |              |              |
|     |              | H            | 4.353480339  | 2.880669117 | 17.883262634 |                          |              |    |              |              |              |
|     |              | H            | 5.094975471  | 5.948149681 | 14.028797150 |                          |              |    |              |              |              |
|     |              | H            | 6.185606956  | 6.399624348 | 15.181503296 |                          |              |    |              |              |              |
|     |              | H            | 6.461911201  | 5.081407547 | 14.242404938 |                          |              |    |              |              |              |
|     |              | N            | 1.553797960  | 1.766002893 | 12.229948997 |                          |              |    |              |              |              |
|     |              | N            | 3.768509626  | 3.937512398 | 10.046236038 |                          |              |    |              |              |              |
|     |              | N            | 3.953015804  | 3.786576271 | 17.604217529 |                          |              |    |              |              |              |
|     |              | N            | 5.725266457  | 5.584794998 | 14.750749588 |                          |              |    |              |              |              |
| ts2 |              |              | Structure F  |             |              | Structure G <sub>1</sub> |              |    |              |              |              |
| Si  | 0.106694162  | 2.597483158  | 8.224810600  | Si          | 0.113241315  | 2.593125343              | 8.204197884  | Si | 0.128226638  | 2.641118765  | 8.094772339  |
| Si  | 7.937908173  | 0.793786466  | 3.133752346  | Si          | 7.947218418  | 0.788161516              | 3.104486704  | Si | 7.946493149  | 0.801704466  | 3.017874956  |
| Si  | 2.409218550  | 8.295863152  | 0.936107814  | Si          | 2.415416479  | 8.303355217              | 0.908805192  | Si | 2.397233725  | 8.312302589  | 0.805296600  |
| Si  | 5.536020279  | 8.402371407  | 1.162328601  | Si          | 5.542038918  | 8.399610519              | 1.123016596  | Si | 5.531002045  | 8.423707008  | 1.061376691  |
| Si  | 7.868375301  | 0.770808220  | 6.253346920  | Si          | 7.873417377  | 0.750676870              | 6.213153362  | Si | 7.891071320  | 0.785817981  | 6.142022133  |
| Si  | 0.067876935  | 5.771604538  | 8.353042603  | Si          | 0.056807995  | 5.770566940              | 8.324174881  | Si | 0.076604187  | 5.809980392  | 8.233421326  |
| Si  | 0.112670511  | 8.068216324  | 6.250968933  | Si          | 0.112224638  | 8.055803299              | 6.219524860  | Si | 0.171467364  | 8.115622520  | 6.119441032  |
| Si  | 5.563955784  | 0.580065906  | 8.413232803  | Si          | 5.563002586  | 0.535454333              | 8.368704796  | Si | 5.602866650  | 0.556346536  | 8.280424118  |
| Si  | 2.423034668  | 0.496406496  | 8.248246193  | Si          | 2.442788601  | 0.492925107              | 8.214029312  | Si | 2.457028866  | 0.535187900  | 8.093462944  |
| Si  | 0.137524456  | 8.150234222  | 3.158304453  | Si          | 0.148244321  | 8.140792847              | 3.131884575  | Si | 0.128920078  | 8.170985222  | 3.024592400  |
| Si  | 7.953628063  | 3.111358404  | 0.968249619  | Si          | 7.947379589  | 3.095934153              | 0.939974606  | Si | 7.939063072  | 3.109550953  | 0.857460380  |
| Si  | 9.510586739  | 2.603721619  | 8.186212540  | Si          | 9.521662712  | 2.586641312              | 8.139085770  | Si | 9.566884995  | 2.630340099  | 8.080398560  |
| Si  | 17.409957886 | 0.859053552  | 3.133703709  | Si          | 17.412963867 | 0.841201305              | 3.107761621  | Si | 17.388299942 | 0.875034511  | 3.019849300  |
| Si  | 11.793038368 | 8.329089165  | 0.985493958  | Si          | 11.794460297 | 8.318478584              | 0.949372888  | Si | 11.782958984 | 8.306073189  | 0.852016866  |
| Si  | 14.902683258 | 8.525747299  | 1.184169054  | Si          | 14.908071518 | 8.512533188              | 1.152361393  | Si | 14.895524979 | 8.542229652  | 1.084079027  |
| Si  | 17.303506851 | 0.754037321  | 6.251039028  | Si          | 17.316411972 | 0.753910780              | 6.224287510  | Si | 17.333702087 | 0.786118507  | 6.140125275  |
| Si  | 9.488486290  | 5.762019634  | 8.412318230  | Si          | 9.508689880  | 5.733061314              | 8.375016212  | Si | 9.479380608  | 5.749336243  | 8.275744438  |
| Si  | 9.511271477  | 8.036360741  | 6.260894299  | Si          | 9.520967484  | 8.023528099              | 6.218262196  | Si | 9.523633957  | 8.059145927  | 6.152462006  |
| Si  | 14.965813637 | 0.592549384  | 8.355075836  | Si          | 14.971373558 | 0.592093468              | 8.330510139  | Si | 14.999795914 | 0.604071796  | 8.238597870  |
| Si  | 11.820369720 | 0.474431634  | 8.202391624  | Si          | 11.824993134 | 0.454895496              | 8.152552605  | Si | 11.861186028 | 0.485492289  | 8.089511871  |
| Si  | 9.525467873  | 8.118865967  | 3.158879995  | Si          | 9.538092613  | 8.105528831              | 3.124526739  | Si | 9.530060768  | 8.101061821  | 3.047591925  |
| Si  | 17.350719452 | 3.133299828  | 0.961270511  | Si          | 17.357740402 | 3.124644279              | 0.931625724  | Si | 17.329345703 | 3.150425673  | 0.832915068  |
| Si  | -0.564164758 | 1.857651830  | 17.559371948 | Si          | -0.552854180 | 1.854959130              | 17.536731720 | Si | -0.580240369 | 1.878293157  | 17.449512482 |
| Si  | 7.239815235  | 0.086025476  | 12.499363899 | Si          | 7.229901314  | 0.065305591              | 12.451583862 | Si | 7.235713959  | 0.081463337  | 12.368268967 |
| Si  | 1.705144286  | 7.554397583  | 10.320032120 | Si          | 1.721071720  | 7.545156956              | 10.289898872 | Si | 1.692588091  | 7.613454819  | 10.201472282 |
| Si  | 4.829402924  | 7.708210468  | 10.581076622 | Si          | 4.830380917  | 7.682846069              | 10.532166481 | Si | 4.825019360  | 7.724443436  | 10.447197914 |
| Si  | 7.209879398  | 0.025722980  | 15.633751869 | Si          | 7.226425171  | 0.018418312              | 15.580004692 | Si | 7.192201614  | 0.016291857  | 15.502179146 |
| Si  | -0.569905400 | 5.027551651  | 17.740854263 | Si          | -0.564493299 | 5.022153854              | 17.704174042 | Si | -0.586724043 | 5.049484253  | 17.609718323 |
| Si  | -0.549661696 | 7.326689243  | 15.606463432 | Si          | -0.555797875 | 7.311682701              | 15.576679230 | Si | -0.567999125 | 7.353032112  | 15.474547386 |
| Si  | 4.893218040  | -0.168289423 | 17.741111755 | Si          | 4.894790649  | -0.162182927             | 17.711082458 | Si | 4.877260685  | -0.163268089 | 17.618471146 |
| Si  | 1.748484373  | -0.258075356 | 17.563072205 | Si          | 1.756175280  | -0.270345449             | 17.531803131 | Si | 1.726903200  | -0.234766960 | 17.436134338 |

|    |              |              |              |    |              |              |              |    |              |              |              |
|----|--------------|--------------|--------------|----|--------------|--------------|--------------|----|--------------|--------------|--------------|
| Si | -0.576682329 | 7.394970417  | 12.514463425 | Si | -0.576653719 | 7.409580231  | 12.474743843 | Si | -0.563954473 | 7.450529575  | 12.388135910 |
| Si | 7.239632130  | 2.384180784  | 10.350333214 | Si | 7.249102592  | 2.339396000  | 10.311308861 | Si | 7.301686764  | 2.375377893  | 10.245471954 |
| Si | 8.855426788  | 1.850215316  | 17.601015091 | Si | 8.862140656  | 1.834150791  | 17.548059464 | Si | 8.846595764  | 1.842698216  | 17.473157883 |
| Si | 16.703880310 | 0.103832006  | 12.498600960 | Si | 16.704177856 | 0.103978157  | 12.472882271 | Si | 16.683654785 | 0.145553112  | 12.391880035 |
| Si | 11.076328278 | 7.574176788  | 10.310716629 | Si | 11.079271317 | 7.550794601  | 10.275579453 | Si | 11.090295792 | 7.580374718  | 10.207017899 |
| Si | 14.186120987 | 7.787565231  | 10.535910606 | Si | 14.186339378 | 7.788449287  | 10.525035858 | Si | 14.193573952 | 7.804065704  | 10.445842743 |
| Si | 16.636325836 | 0.021370173  | 15.613367081 | Si | 16.642787933 | 0.022575736  | 15.593620300 | Si | 16.612094879 | 0.037890792  | 15.495829582 |
| Si | 8.803726196  | 5.018331528  | 17.749828339 | Si | 8.794048309  | 5.006546974  | 17.699726105 | Si | 8.795968056  | 5.006505966  | 17.631212234 |
| Si | 8.881694794  | 7.311154366  | 15.633065224 | Si | 8.884945869  | 7.303489685  | 15.586955070 | Si | 8.846879959  | 7.303496838  | 15.498205185 |
| Si | 14.309076309 | -0.150583982 | 17.736642838 | Si | 14.312335968 | -0.148643732 | 17.706340790 | Si | 14.294858932 | -0.141280293 | 17.618480682 |
| Si | 11.183762550 | -0.259342670 | 17.603242874 | Si | 11.186641693 | -0.264586329 | 17.568750381 | Si | 11.155950546 | -0.266466141 | 17.473760605 |
| Si | 8.823513985  | 7.332177162  | 12.532730103 | Si | 8.835038185  | 7.281357288  | 12.493397713 | Si | 8.847088814  | 7.272201061  | 12.392849922 |
| Si | 16.632654190 | 2.387267113  | 10.331003189 | Si | 16.622945786 | 2.388369083  | 10.299373627 | Si | 16.658006668 | 2.417485952  | 10.195950508 |
| Al | 7.829640388  | 6.303870201  | 1.152297020  | Al | 7.831493855  | 6.287640095  | 1.121918559  | Al | 7.829224110  | 6.288525581  | 1.089177847  |
| Al | 17.407335281 | 6.282106400  | 1.216091633  | Al | 17.412393570 | 6.269189358  | 1.186265707  | Al | 17.397415161 | 6.296235561  | 1.085725665  |
| Al | 7.163201809  | 5.551698685  | 10.626437187 | Al | 7.182383060  | 5.512547493  | 10.589039803 | Al | 7.162284851  | 5.516471863  | 10.492659569 |
| Al | 16.652452469 | 5.536844730  | 10.532628059 | Al | 16.645788193 | 5.539740562  | 10.514643669 | Al | 16.688165665 | 5.564106941  | 10.393072128 |
| O  | 1.571708322  | 1.883780122  | 8.390739441  | O  | 1.578478575  | 1.873624325  | 8.386984825  | O  | 1.586040139  | 1.908100009  | 8.221147537  |
| O  | 0.039375544  | 0.190554768  | 3.051134586  | O  | 0.046026111  | 0.179240450  | 3.029484749  | O  | 0.014113888  | 0.201763049  | 2.908282280  |
| O  | 7.952309132  | 2.182583332  | 2.298901320  | O  | 7.981773853  | 2.182163477  | 2.280243635  | O  | 7.974298477  | 2.192343950  | 2.189173222  |
| O  | 2.859741449  | 0.326294780  | 0.158391878  | O  | 2.885604620  | 0.346204817  | 0.149739340  | O  | 2.853516340  | 0.337879390  | 0.022357360  |
| O  | 1.483441472  | 8.261923790  | 2.257719994  | O  | 1.495098233  | 8.263703346  | 2.232272148  | O  | 1.478452802  | 8.296955109  | 2.127908230  |
| O  | -0.050139859 | 3.035058498  | 0.173559695  | O  | -0.034978785 | 3.037947416  | 0.154716760  | O  | -0.056000847 | 3.060310841  | 0.071415260  |
| O  | 6.230302334  | 6.987275124  | 0.876952469  | O  | 6.235814095  | 6.982285500  | 0.852227509  | O  | 6.250434875  | 7.015061855  | 0.806821048  |
| O  | 8.072576523  | 8.807763100  | 6.396052837  | O  | 8.075532913  | 8.784996033  | 6.335914612  | O  | 8.076784134  | 8.813302040  | 6.274371147  |
| O  | 6.458961487  | 0.557099700  | 7.061024189  | O  | 6.474812031  | 0.531201184  | 7.028455734  | O  | 6.462144852  | 0.567194879  | 6.904998302  |
| O  | 8.143157005  | 5.944857121  | 9.248106956  | O  | 8.152329445  | 5.881721973  | 9.194132805  | O  | 8.082893372  | 5.816633224  | 9.044730186  |
| O  | 0.092221141  | 6.600113392  | 6.949682236  | O  | 0.070691764  | 6.585825443  | 6.910110474  | O  | 0.147078335  | 6.663877487  | 6.845356941  |
| O  | 5.002180099  | 8.552235603  | 9.189438820  | O  | 4.937840939  | 8.483824730  | 9.105887413  | O  | 5.026134014  | 8.504937172  | 9.019078255  |
| O  | 1.302848339  | 6.334799767  | 9.308573723  | O  | 1.286023617  | 6.358703613  | 9.262508392  | O  | 1.254816413  | 6.362337589  | 9.254009247  |
| O  | 18.144081116 | 1.979459286  | 6.942856312  | O  | -0.676182687 | 1.977106810  | 6.910648346  | O  | 18.138198853 | 2.036224127  | 6.820571423  |
| O  | 6.152285099  | 9.188909531  | 2.449599743  | O  | 6.159743786  | 9.204746246  | 2.392273188  | O  | 6.805514812  | -0.160552710 | 2.344239235  |
| O  | 6.020084858  | 1.786080599  | 9.407669067  | O  | 6.044710159  | 1.684205055  | 9.406420708  | O  | 6.143222809  | 1.692855954  | 9.307468414  |
| O  | 18.017530441 | 6.971704006  | 2.657317162  | O  | 18.036653519 | 6.957965851  | 2.622135162  | O  | 18.024934769 | 6.981111050  | 2.520080805  |
| O  | 1.897648811  | -0.373180360 | 6.991676807  | O  | 1.883104324  | -0.387915134 | 6.982567310  | O  | 1.996265531  | -0.321107805 | 6.797049522  |
| O  | 0.571257949  | 7.904628754  | 4.711052418  | O  | 0.592476010  | 7.897479534  | 4.682855129  | O  | 0.579496562  | 7.921881676  | 4.566991806  |
| O  | 3.990329742  | 0.862185895  | 8.043936729  | O  | 4.002629757  | 0.866462946  | 7.975359440  | O  | 4.036131859  | 0.907785594  | 7.965703487  |
| O  | 7.569894314  | 4.605485916  | 1.305368781  | O  | 7.587290764  | 4.592288017  | 1.294600964  | O  | 7.521044254  | 4.596107960  | 1.200231075  |
| O  | 7.516455650  | 1.071394086  | 4.690182209  | O  | 7.502732754  | 1.057514429  | 4.653627872  | O  | 7.563891888  | 1.101795673  | 4.576336384  |
| O  | 3.942631245  | 8.177333832  | 1.417220116  | O  | 3.952066422  | 8.167219162  | 1.379840136  | O  | 3.937601089  | 8.190359116  | 1.274438739  |
| O  | 0.380367041  | 4.190804958  | 8.034775734  | O  | 0.375045955  | 4.187730789  | 8.020207405  | O  | 0.390149653  | 4.234580040  | 7.895515442  |
| O  | 10.960966110 | 1.849562526  | 8.285571098  | O  | 10.968607903 | 1.829269767  | 8.255583763  | O  | 11.003133774 | 1.859054804  | 8.199783325  |
| O  | 9.436562538  | 0.166591883  | 3.093045950  | O  | 9.440736771  | 0.148937359  | 3.074465036  | O  | 9.426925659  | 0.137325943  | 2.929950476  |
| O  | 17.433361053 | 2.264491796  | 2.338132858  | O  | 17.434122086 | 2.236882210  | 2.295861483  | O  | 17.391357422 | 2.267579317  | 2.199330091  |



|   |              |              |              |   |              |              |              |   |              |              |              |
|---|--------------|--------------|--------------|---|--------------|--------------|--------------|---|--------------|--------------|--------------|
| O | 12.385639191 | 0.399222583  | 0.267135262  | O | 12.398277283 | 0.387989432  | 0.231260866  | O | 12.335880280 | 0.361000717  | 0.113763750  |
| O | 10.939471245 | 8.310719490  | 2.344240189  | O | 10.953097343 | 8.315048218  | 2.316690445  | O | 10.930792809 | 8.280849457  | 2.210024834  |
| O | 9.425814629  | 2.988379955  | 0.235637516  | O | 9.384381294  | 2.947710037  | 0.148018703  | O | 9.392908096  | 2.998040438  | 0.097540982  |
| O | 15.665347099 | 7.000287533  | 1.033481121  | O | 15.671476364 | 6.988554001  | 0.983505487  | O | 15.653676987 | 7.016803265  | 0.926737964  |
| O | 17.473955154 | 8.765772820  | 6.359292984  | O | 17.478887558 | 8.761333466  | 6.319530010  | O | 17.540010452 | 8.821910858  | 6.247086525  |
| O | 15.870876312 | 0.555324495  | 7.006906033  | O | 15.893105507 | 0.546241403  | 6.993683815  | O | 15.908634186 | 0.533039808  | 6.894815922  |
| O | 17.495105743 | 5.959025383  | 9.091143608  | O | 17.488378525 | 5.956471920  | 9.073261261  | O | 17.475971222 | 5.983453274  | 8.922439575  |
| O | 9.433494568  | 6.601284981  | 7.011949062  | O | 9.464722633  | 6.602133274  | 6.991835117  | O | 9.446343422  | 6.623158455  | 6.893806934  |
| O | 14.451212883 | 8.545464516  | 9.134867668  | O | 14.459527016 | 8.557749748  | 9.132142067  | O | 14.461838722 | 8.574045181  | 9.052978516  |
| O | 10.781217575 | 6.346975327  | 9.282412529  | O | 10.794085503 | 6.304677963  | 9.267713547  | O | 10.718181610 | 6.354091167  | 9.207145691  |
| O | 8.684234619  | 2.041185856  | 6.887460709  | O | 8.697238922  | 2.017177582  | 6.842280388  | O | 8.710231781  | 2.030123711  | 6.819457531  |
| O | 16.287425995 | -0.129048631 | 2.431726217  | O | 16.299077988 | -0.164515242 | 2.412039280  | O | 16.249998093 | -0.123188183 | 2.354157686  |
| O | 15.483797073 | 1.758025169  | 9.356589317  | O | 15.473131180 | 1.779499531  | 9.313120842  | O | 15.518523216 | 1.795486212  | 9.203223228  |
| O | 8.638201714  | 6.957601547  | 2.532434702  | O | 8.660566330  | 6.946527958  | 2.479652405  | O | 8.648974419  | 6.901648998  | 2.475888252  |
| O | 11.371075630 | -0.434476346 | 6.938610554  | O | 11.379152298 | -0.425513387 | 6.867296219  | O | 11.375591278 | -0.408719897 | 6.830690861  |
| O | 9.922552109  | 7.804679394  | 4.712054729  | O | 9.925656319  | 7.765242577  | 4.671869278  | O | 9.940836906  | 7.847593784  | 4.603457928  |
| O | 13.404783249 | 0.845233917  | 8.008800507  | O | 13.410672188 | 0.827745736  | 7.975037098  | O | 13.440027237 | 0.854311585  | 7.874348640  |
| O | 16.939668655 | 4.635949612  | 1.310109019  | O | 16.948743820 | 4.624336243  | 1.294147015  | O | 16.921968460 | 4.653570175  | 1.181227207  |
| O | 16.991600037 | 1.107097745  | 4.689843178  | O | 16.998516083 | 1.107402086  | 4.662929058  | O | 17.001066208 | 1.134479403  | 4.579393387  |
| O | 13.368126869 | 8.107819557  | 1.422741055  | O | 13.372585297 | 8.082330704  | 1.373418927  | O | 13.358427048 | 8.117926598  | 1.289565086  |
| O | 9.798453331  | 4.194105148  | 8.038704872  | O | 9.824379921  | 4.171925068  | 7.977374077  | O | 9.878758430  | 4.207892418  | 7.865920067  |
| O | 0.896703482  | 1.128858447  | 17.681755066 | O | 0.906049967  | 1.118632913  | 17.636936188 | O | 0.890048265  | 1.159795642  | 17.573902130 |
| O | -0.642093778 | -0.538712502 | 12.441525459 | O | -0.631873965 | -0.516762614 | 12.394734383 | O | -0.676254988 | -0.513199270 | 12.352249146 |
| O | 7.344827652  | 1.491423368  | 11.711544037 | O | 7.409752846  | 1.482135534  | 11.692032814 | O | 7.442642689  | 1.504338741  | 11.626441956 |
| O | 2.192784548  | -0.360625535 | 9.633696556  | O | 2.277611732  | -0.349277526 | 9.621146202  | O | 2.197810650  | -0.339559019 | 9.449608803  |
| O | 0.806138873  | 7.552328587  | 11.670175552 | O | 0.805817723  | 7.548768044  | 11.627981186 | O | 0.823604763  | 7.701240063  | 11.572072029 |
| O | -0.741094172 | 2.310179949  | 9.594202042  | O | -0.752460480 | 2.292535782  | 9.559769630  | O | -0.711612046 | 2.338850975  | 9.467580795  |
| O | 5.575672150  | 6.301169395  | 10.510445595 | O | 5.638576984  | 6.321399689  | 10.496237755 | O | 5.638005257  | 6.367874146  | 10.503013611 |
| O | 7.414276123  | 8.053325653  | 15.766417503 | O | 7.406129837  | 8.028156281  | 15.707601547 | O | 7.364119530  | 8.022976875  | 15.605816841 |
| O | 5.769065857  | -0.269083142 | 16.361009598 | O | 5.797645569  | -0.226870656 | 16.351665497 | O | 5.751709938  | -0.250817180 | 16.238830566 |
| O | 7.357085705  | 5.166749477  | 18.412631989 | O | 7.330241680  | 5.147029877  | 18.352987289 | O | 7.359009743  | 5.163883209  | 18.337728500 |
| O | -0.576953948 | 5.889139175  | 16.351175308 | O | -0.588308990 | 5.857060432  | 16.295480728 | O | -0.568722844 | 5.911276817  | 16.218591690 |
| O | 4.333792686  | 7.816851139  | 18.520029068 | O | 4.340986729  | 7.800919533  | 18.464260101 | O | 4.342903137  | 7.811023712  | 18.392105103 |
| O | 0.694468737  | 5.561594486  | 18.653621674 | O | 0.693179727  | 5.584266663  | 18.611600876 | O | 0.679470778  | 5.574862480  | 18.529697418 |
| O | -1.356885910 | 1.267178535  | 16.247766495 | O | -1.357488275 | 1.272162318  | 16.232467651 | O | 17.453054428 | 1.272758365  | 16.160781860 |
| O | 6.007893085  | -0.788749814 | 11.867121696 | O | 5.969542503  | -0.733410358 | 11.777253151 | O | 5.913779736  | -0.647721887 | 11.707350731 |
| O | 5.430171490  | 1.080572724  | 18.625305176 | O | 5.373099327  | 1.070194483  | 18.647054672 | O | 5.401927948  | 1.059355617  | 18.540893555 |
| O | 17.314659119 | 6.249437809  | 11.941432953 | O | 17.299585342 | 6.264433384  | 11.923292160 | O | 17.378877640 | 6.272796631  | 11.792701721 |
| O | 1.285113215  | -1.085719943 | 16.235208511 | O | 1.287425756  | -1.131700516 | 16.232933044 | O | 1.253748775  | -1.042695642 | 16.105119705 |
| O | -0.148050487 | 7.089566231  | 14.053271294 | O | -0.154223979 | 7.116622448  | 14.018639565 | O | -0.141300261 | 7.128744602  | 13.929773331 |
| O | 3.324185610  | 0.129692435  | 17.373590469 | O | 3.330535889  | 0.111334801  | 17.320257187 | O | 3.311993599  | 0.114506483  | 17.247364044 |
| O | 6.807430744  | 3.860154867  | 10.740600586 | O | 6.759820938  | 3.816093683  | 10.673484802 | O | 6.740530014  | 3.819334984  | 10.658484459 |
| O | 6.882756233  | 0.368342400  | 14.076111794 | O | 6.869529247  | 0.349369645  | 14.028522491 | O | 6.855877876  | 0.362702608  | 13.943284035 |
| O | 3.235599995  | 7.391419888  | 10.806206703 | O | 3.243031502  | 7.304073811  | 10.781355858 | O | 3.231711626  | 7.445758820  | 10.668627739 |

|    |              |              |              |    |              |              |              |    |              |              |              |
|----|--------------|--------------|--------------|----|--------------|--------------|--------------|----|--------------|--------------|--------------|
| O  | -0.286229730 | 3.450641155  | 17.369173050 | O  | -0.247726560 | 3.444938660  | 17.352821350 | O  | -0.304531574 | 3.470864773  | 17.239812851 |
| O  | 10.308473587 | 1.106181622  | 17.649835587 | O  | 10.320844650 | 1.106264830  | 17.641124725 | O  | 10.304542542 | 1.114464045  | 17.567378998 |
| O  | 8.672715187  | -0.660169423 | 12.400875092 | O  | 8.622446060  | -0.749595165 | 12.362064362 | O  | 8.576639175  | -0.795723498 | 12.250130653 |
| O  | 16.733732224 | 1.511430383  | 11.706428528 | O  | 16.701169968 | 1.504097462  | 11.670870781 | O  | 16.708610535 | 1.535552740  | 11.570332527 |
| O  | 11.617459297 | -0.359522909 | 9.597457886  | O  | 11.605671883 | -0.404429734 | 9.526399612  | O  | 11.673565865 | -0.363577336 | 9.472350121  |
| O  | 10.184858322 | 7.518085003  | 11.649194717 | O  | 10.191425323 | 7.524924755  | 11.614081383 | O  | 10.209811211 | 7.606663227  | 11.555350304 |
| O  | 8.660017967  | 2.276441097  | 9.543103218  | O  | 8.662128448  | 2.270537138  | 9.491073608  | O  | 8.734530449  | 2.380562305  | 9.469331741  |
| O  | 14.906842232 | 6.239939213  | 10.371016502 | O  | 14.899803162 | 6.239479542  | 10.351051331 | O  | 14.942222595 | 6.272195816  | 10.289994240 |
| O  | 16.826570511 | 8.046220779  | 15.717903137 | O  | 16.828594208 | 8.045096397  | 15.713972092 | O  | 16.802068710 | 8.059342384  | 15.591176987 |
| O  | 15.224949837 | -0.194601893 | 16.395645142 | O  | 15.225328445 | -0.193767548 | 16.364011765 | O  | 15.197860718 | -0.198477626 | 16.270811081 |
| O  | 16.881549835 | 5.222061157  | 18.514337540 | O  | 16.887655258 | 5.201504230  | 18.481771469 | O  | 16.858655930 | 5.245162964  | 18.374994278 |
| O  | 8.795951843  | 5.831712723  | 16.313585281 | O  | 8.802758217  | 5.832704544  | 16.280218124 | O  | 8.763782501  | 5.847136974  | 16.220363617 |
| O  | 13.764805794 | 7.797832489  | 18.508123398 | O  | 13.774901390 | 7.807058334  | 18.490200043 | O  | 13.778925896 | 7.828189373  | 18.421091080 |
| O  | 10.016311646 | 5.644015312  | 18.681707382 | O  | 9.983370781  | 5.637030602  | 18.656145096 | O  | 10.018361092 | 5.601824760  | 18.564880371 |
| O  | 7.976725578  | 1.292631865  | 16.322057724 | O  | 8.046128273  | 1.268506289  | 16.236171722 | O  | 7.997295380  | 1.256968498  | 16.187770844 |
| O  | 15.618625641 | -0.909473956 | 11.785571098 | O  | 15.616722107 | -0.922062099 | 11.784331322 | O  | 15.583271027 | -0.872580826 | 11.707226753 |
| O  | 14.805905342 | 1.022749782  | 18.730657578 | O  | 14.813037872 | 1.032415032  | 18.688987732 | O  | 14.786799431 | 1.056085587  | 18.586744308 |
| O  | 7.933036327  | 6.082605362  | 12.100214005 | O  | 8.020181656  | 5.987713814  | 12.048152924 | O  | 8.100772858  | 5.959792137  | 11.896684647 |
| O  | 10.710274696 | -1.188771844 | 16.363439560 | O  | 10.700708389 | -1.178861737 | 16.322439194 | O  | 10.649750710 | -1.147175789 | 16.210008621 |
| O  | 9.302141190  | 7.159924507  | 14.086485863 | O  | 9.328165054  | 7.146249294  | 14.048101425 | O  | 9.286062241  | 7.124215126  | 13.960111618 |
| O  | 12.753911018 | 0.112421155  | 17.358949661 | O  | 12.757448196 | 0.107585549  | 17.328380585 | O  | 12.730607986 | 0.087194443  | 17.246026993 |
| O  | 16.219341278 | 3.887130022  | 10.689424515 | O  | 16.227437973 | 3.887919426  | 10.677346230 | O  | 16.238080978 | 3.917217016  | 10.550428391 |
| O  | 16.285360336 | 0.352379322  | 14.051894188 | O  | 16.306318283 | 0.354034305  | 14.030524254 | O  | 16.257785797 | 0.398842931  | 13.944767952 |
| O  | 12.647543907 | 7.426881790  | 10.806349754 | O  | 12.647655487 | 7.426705837  | 10.788224220 | O  | 12.659776688 | 7.386276722  | 10.687293053 |
| O  | 9.134634972  | 3.443519115  | 17.411218643 | O  | 9.134243011  | 3.431138992  | 17.389465332 | O  | 9.111384392  | 3.436614990  | 17.276901245 |
| O  | 2.696560144  | 3.226141691  | 14.775447845 | O  | 3.081777096  | 3.240716934  | 14.567228317 | O  | 3.837025881  | 2.431928635  | 15.138590813 |
| O  | 3.326148987  | 3.873257875  | 13.724428177 | O  | 3.844632149  | 4.378922462  | 13.978012085 | O  | 4.393550873  | 4.417146683  | 13.832491875 |
| Cu | 3.161737442  | 2.930607080  | 11.956857681 | Cu | 3.286572933  | 3.106550217  | 12.652004242 | O  | 2.655309916  | 5.186351299  | 12.747518539 |
| Cu | 4.081342697  | 4.142196655  | 15.638825417 | Cu | 4.065319538  | 4.253757954  | 15.878425598 | Cu | 3.977373362  | 2.610248327  | 13.369050980 |
| H  | 15.027420044 | 6.267464638  | 0.931690276  | H  | 15.033161163 | 6.257522106  | 0.870008051  | Cu | 4.372308731  | 4.005626202  | 15.928092003 |
| H  | 1.457206845  | 1.502439737  | 13.119847298 | H  | 1.451747894  | 1.322467923  | 12.613059044 | H  | 15.014687538 | 6.283439636  | 0.835165977  |
| H  | 1.961287022  | 0.714506209  | 11.760776520 | H  | 2.374992371  | 1.054576159  | 11.287817955 | H  | 3.679183483  | 0.430699468  | 14.248449326 |
| H  | 2.891981363  | 0.707924843  | 13.120175362 | H  | 2.919773340  | 0.614561677  | 12.768566132 | H  | 2.748938084  | 0.439462066  | 12.860313416 |
| H  | 3.054193020  | 4.246270657  | 9.832874298  | H  | 3.379810810  | 3.466392279  | 10.106935501 | H  | 4.394722462  | 0.177750230  | 12.743769646 |
| H  | 4.338139534  | 4.857056141  | 10.676709175 | H  | 3.689571381  | 4.879946232  | 10.898289680 | H  | 4.086626053  | 2.131636858  | 10.851490974 |
| H  | 4.475221157  | 3.407947302  | 9.942801476  | H  | 4.866920471  | 3.755699635  | 10.793510437 | H  | 3.411014318  | 3.606493950  | 11.147594452 |
| H  | 14.253443718 | 5.521830559  | 10.262949944 | H  | 14.242722511 | 5.526715279  | 10.231452942 | H  | 5.066555023  | 3.409589291  | 11.236611366 |
| H  | 4.073069572  | 4.414710045  | 18.231063843 | H  | 3.864486933  | 4.260048866  | 18.404851913 | H  | 14.296528816 | 5.543577194  | 10.205929756 |
| H  | 2.772927999  | 3.516114235  | 17.704916000 | H  | 2.605376720  | 3.374805927  | 17.749830246 | H  | 3.901818752  | 4.230707645  | 18.434398651 |
| H  | 4.262973785  | 2.829550028  | 17.828485489 | H  | 4.104782581  | 2.708631039  | 17.911352158 | H  | 2.711328506  | 3.289732933  | 17.698762894 |
| H  | 5.790555000  | 5.807978630  | 14.735356331 | H  | 5.810178280  | 6.041721821  | 15.480439186 | H  | 4.199287415  | 2.647917271  | 18.043502808 |
| H  | 5.454203129  | 6.175723076  | 16.304994583 | H  | 4.863076687  | 6.489374638  | 16.748514175 | H  | 5.688964844  | 6.146717548  | 15.588694572 |
| H  | 6.473117828  | 4.964954376  | 15.965581894 | H  | 6.060271263  | 5.409093380  | 16.991743088 | H  | 4.723457813  | 6.355834007  | 16.902639389 |
| N  | 2.278985023  | 1.293802023  | 12.546262741 | N  | 2.417273283  | 1.356069088  | 12.269766808 | H  | 6.089525223  | 5.480405807  | 17.050888062 |

| N                        | 3.811258316  | 3.987384319  | 10.473430634 | N   | 3.839700222  | 3.863977909  | 10.930364609 | N                        | 3.659497261  | 0.694377303  | 13.256405830 |
|--------------------------|--------------|--------------|--------------|-----|--------------|--------------|--------------|--------------------------|--------------|--------------|--------------|
| N                        | 3.770825863  | 3.689314127  | 17.548809052 | N   | 3.606841326  | 3.575671673  | 17.670097351 | N                        | 4.142718792  | 2.958150864  | 11.451931000 |
| N                        | 5.595601559  | 5.395639896  | 15.652923584 | N   | 5.326375008  | 5.685807228  | 16.308471680 | N                        | 3.712922096  | 3.497943401  | 17.728067398 |
|                          |              |              |              |     |              |              |              | N                        | 5.296250820  | 5.666070938  | 16.402057648 |
|                          |              |              |              |     |              |              |              | N                        | 3.588595152  | 5.448295593  | 13.457756996 |
| Structure H <sub>1</sub> |              |              |              | ts3 |              |              |              | Structure I <sub>1</sub> |              |              |              |
| Si                       | 0.157690704  | 2.565630674  | 8.170241356  | Si  | 0.154412985  | 2.559951067  | 8.149262428  | Si                       | 0.141878605  | 2.580595493  | 8.096383095  |
| Si                       | 7.986646175  | 0.754931152  | 3.076496601  | Si  | 7.986307621  | 0.788917005  | 3.065004587  | Si                       | 7.973525047  | 0.769697309  | 3.051326752  |
| Si                       | 2.459908247  | 8.268571854  | 0.886128843  | Si  | 2.444466829  | 8.296120644  | 0.860471725  | Si                       | 2.436295986  | 8.252837181  | 0.839507639  |
| Si                       | 5.544376850  | 8.347889900  | 1.134786606  | Si  | 5.565512657  | 8.412755966  | 1.101354837  | Si                       | 5.570170879  | 8.383524895  | 1.089719772  |
| Si                       | 7.917828083  | 0.702827096  | 6.199248314  | Si  | 7.923014641  | 0.726911902  | 6.189762115  | Si                       | 7.937303066  | 0.746677279  | 6.175219536  |
| Si                       | 0.124524236  | 5.733038902  | 8.283512115  | Si  | 0.120779753  | 5.729834080  | 8.275326729  | Si                       | 0.124927580  | 5.748226643  | 8.256151199  |
| Si                       | 0.191374093  | 8.026612282  | 6.186892986  | Si  | 0.162862718  | 8.031441689  | 6.160737991  | Si                       | 0.180006117  | 8.036613464  | 6.137929916  |
| Si                       | 5.612789631  | 0.491305828  | 8.347272873  | Si  | 5.602289677  | 0.488413036  | 8.312781334  | Si                       | 5.615972996  | 0.564545453  | 8.317337036  |
| Si                       | 2.504199028  | 0.456802487  | 8.181244850  | Si  | 2.489707947  | 0.460075021  | 8.125188828  | Si                       | 2.483977318  | 0.460790396  | 8.088500023  |
| Si                       | 0.159189090  | 8.107214928  | 3.102379322  | Si  | 0.167114630  | 8.123444557  | 3.067311287  | Si                       | 0.151607513  | 8.078193665  | 3.039926767  |
| Si                       | 8.000976563  | 3.040209532  | 0.911744118  | Si  | 7.978414536  | 3.075532198  | 0.904453874  | Si                       | 7.980780125  | 3.057545185  | 0.896758974  |
| Si                       | 9.574583054  | 2.548782587  | 8.128276825  | Si  | 9.574945450  | 2.566618443  | 8.126190186  | Si                       | 9.571424484  | 2.563745499  | 8.118916512  |
| Si                       | 17.418716431 | 0.806806326  | 3.087736368  | Si  | 17.421163559 | 0.815734386  | 3.064358473  | Si                       | 17.421371460 | 0.786200106  | 3.027476072  |
| Si                       | 11.820770264 | 8.247288704  | 0.913116574  | Si  | 11.817389488 | 8.269162178  | 0.905569911  | Si                       | 11.811656952 | 8.273587227  | 0.890608430  |
| Si                       | 14.939582825 | 8.468750000  | 1.129404545  | Si  | 14.932030678 | 8.481714249  | 1.109522581  | Si                       | 14.923753738 | 8.461726189  | 1.085435987  |
| Si                       | 17.372282028 | 0.730538726  | 6.201564312  | Si  | 17.353466034 | 0.714450002  | 6.183293343  | Si                       | 17.335550308 | 0.719167948  | 6.154577255  |
| Si                       | 9.541790962  | 5.681144714  | 8.335585594  | Si  | 9.534123421  | 5.700987816  | 8.324247360  | Si                       | 9.536041260  | 5.725536346  | 8.323762894  |
| Si                       | 9.565092087  | 7.979983807  | 6.186958313  | Si  | 9.561095238  | 8.003641129  | 6.188625336  | Si                       | 9.558735847  | 8.013797760  | 6.191479206  |
| Si                       | 15.018927574 | 0.568696260  | 8.301446915  | Si  | 15.013397217 | 0.553149164  | 8.287512779  | Si                       | 15.020861626 | 0.538515866  | 8.249281883  |
| Si                       | 11.890657425 | 0.417873979  | 8.101305962  | Si  | 11.881127357 | 0.435095310  | 8.118272781  | Si                       | 11.882821083 | 0.449323416  | 8.131734848  |
| Si                       | 9.578433990  | 8.042692184  | 3.080967188  | Si  | 9.577386856  | 8.061132431  | 3.080189466  | Si                       | 9.584230423  | 8.066582680  | 3.080217838  |
| Si                       | 17.386241913 | 3.090184927  | 0.900618792  | Si  | 17.370754242 | 3.098549843  | 0.882937908  | Si                       | 17.365978241 | 3.082933426  | 0.859046102  |
| Si                       | -0.517113328 | 1.836229444  | 17.515098572 | Si  | -0.534533620 | 1.851226211  | 17.488000870 | Si                       | -0.530030727 | 1.832558393  | 17.478374481 |
| Si                       | 7.257201195  | 0.004977703  | 12.432049751 | Si  | 7.254605770  | 0.021915674  | 12.388816833 | Si                       | 7.286270142  | 0.040066600  | 12.403183937 |
| Si                       | 1.768718243  | 7.517705441  | 10.271579742 | Si  | 1.752340317  | 7.508475780  | 10.233528137 | Si                       | 1.745842695  | 7.556741714  | 10.204482079 |
| Si                       | 4.864164829  | 7.653110504  | 10.522834778 | Si  | 4.854580879  | 7.661042213  | 10.482196808 | Si                       | 4.880036831  | 7.665311337  | 10.445102692 |
| Si                       | 7.273432732  | -0.090577841 | 15.584084511 | Si  | 7.251410484  | -0.040876746 | 15.550387383 | Si                       | 7.224463940  | -0.028978586 | 15.534107208 |
| Si                       | -0.529229999 | 5.005412579  | 17.672163010 | Si  | -0.530886292 | 5.009912491  | 17.645055771 | Si                       | -0.534347773 | 4.989058018  | 17.624378204 |
| Si                       | -0.512333512 | 7.304365635  | 15.553194046 | Si  | -0.520141065 | 7.314757347  | 15.534622192 | Si                       | -0.508226812 | 7.298828125  | 15.513729095 |
| Si                       | 4.925330639  | -0.235197902 | 17.695184708 | Si  | 4.914133549  | -0.190228701 | 17.665296555 | Si                       | 4.920918465  | -0.228766561 | 17.676895142 |
| Si                       | 1.816471696  | -0.288259864 | 17.501432419 | Si  | 1.785797358  | -0.268366456 | 17.485660553 | Si                       | 1.772177219  | -0.305483818 | 17.485973358 |
| Si                       | -0.526197433 | 7.399819374  | 12.443095207 | Si  | -0.529246092 | 7.398970127  | 12.424757957 | Si                       | -0.526398003 | 7.387313843  | 12.411131859 |
| Si                       | 7.311164379  | 2.296704769  | 10.311795235 | Si  | 7.290243626  | 2.303526640  | 10.281044006 | Si                       | 7.277621269  | 2.344069719  | 10.271551132 |
| Si                       | 8.912342072  | 1.760564446  | 17.529302597 | Si  | 8.893909454  | 1.796867490  | 17.502773285 | Si                       | 8.879602432  | 1.793923378  | 17.489984512 |
| Si                       | 16.731750488 | 0.089083254  | 12.446344376 | Si  | 16.739351273 | 0.086137295  | 12.426929474 | Si                       | 16.754884720 | 0.090776086  | 12.411956787 |
| Si                       | 11.135545731 | 7.516611576  | 10.241235733 | Si  | 11.129720688 | 7.522865772  | 10.247166634 | Si                       | 11.132381439 | 7.533594131  | 10.245993614 |
| Si                       | 14.229578018 | 7.763235092  | 10.507335663 | Si  | 14.230512619 | 7.754325867  | 10.483962059 | Si                       | 14.229035378 | 7.763610840  | 10.475517273 |
| Si                       | 16.679611206 | 0.009841323  | 15.570734024 | Si  | 16.665510178 | 0.004511833  | 15.554565430 | Si                       | 16.670875549 | -0.000035524 | 15.537531853 |

|    |              |              |              |    |              |              |              |    |              |              |              |
|----|--------------|--------------|--------------|----|--------------|--------------|--------------|----|--------------|--------------|--------------|
| Si | 8.827304840  | 4.935642719  | 17.656978607 | Si | 8.822122574  | 4.957914352  | 17.661197662 | Si | 8.809885979  | 4.956295967  | 17.652133942 |
| Si | 8.937134743  | 7.229304314  | 15.543010712 | Si | 8.884717941  | 7.261359215  | 15.544413567 | Si | 8.872364044  | 7.259376526  | 15.535717964 |
| Si | 14.358773232 | -0.203181386 | 17.678356171 | Si | 14.335813522 | -0.192801833 | 17.656650543 | Si | 14.331473351 | -0.204102159 | 17.632734299 |
| Si | 11.227419853 | -0.330652952 | 17.522583008 | Si | 11.203113556 | -0.311139464 | 17.505704880 | Si | 11.198187828 | -0.313722968 | 17.492324829 |
| Si | 8.889410973  | 7.216984749  | 12.433641434 | Si | 8.863355637  | 7.236431122  | 12.411705017 | Si | 8.858989716  | 7.315596581  | 12.431436539 |
| Si | 16.656608582 | 2.371224642  | 10.266867638 | Si | 16.670911789 | 2.359625816  | 10.257042885 | Si | 16.695293427 | 2.361489773  | 10.222071648 |
| Al | 7.878773689  | 6.233063698  | 1.068233132  | Al | 7.868164063  | 6.252653599  | 1.099824667  | Al | 7.888721943  | 6.236546516  | 1.116415977  |
| Al | 17.445478439 | 6.230118275  | 1.169661045  | Al | 17.435907364 | 6.233434677  | 1.120150447  | Al | 17.429100037 | 6.209265709  | 1.100070238  |
| Al | 7.242438316  | 5.455528259  | 10.555221558 | Al | 7.211966038  | 5.466716766  | 10.516181946 | Al | 7.184818268  | 5.521879196  | 10.490487099 |
| Al | 16.721336365 | 5.512806416  | 10.474520683 | Al | 16.720029831 | 5.507710457  | 10.465997696 | Al | 16.709796906 | 5.507758141  | 10.449882507 |
| O  | 1.606045008  | 1.813988209  | 8.341614723  | O  | 1.617011070  | 1.833590865  | 8.332128525  | O  | 1.594958782  | 1.834095478  | 8.211822510  |
| O  | 0.048063636  | 0.138771176  | 3.018490791  | O  | 0.052849978  | 0.154461443  | 2.982493401  | O  | 0.049400046  | 0.116053089  | 2.935514212  |
| O  | 8.050379753  | 2.162503481  | 2.277854681  | O  | 8.068350792  | 2.193406105  | 2.262248993  | O  | 8.055006981  | 2.173823833  | 2.253452778  |
| O  | 3.008180380  | 0.316466808  | 0.123287350  | O  | 2.936116695  | 0.336251140  | 0.098865300  | O  | 2.868632793  | 0.284139514  | 0.084024534  |
| O  | 1.471208453  | 8.243300438  | 2.155400276  | O  | 1.522374034  | 8.273977280  | 2.182176828  | O  | 1.511161208  | 8.191657066  | 2.161062956  |
| O  | 0.005215187  | 3.031098366  | 0.139191568  | O  | -0.016947720 | 3.051584482  | 0.109657846  | O  | -0.016780779 | 3.041991949  | 0.100824825  |
| O  | 6.285691738  | 6.957358837  | 0.843975246  | O  | 6.291903019  | 7.005172253  | 0.881642461  | O  | 6.304325581  | 6.972571373  | 0.911614478  |
| O  | 8.120052338  | 8.738357544  | 6.330405712  | O  | 8.112627029  | 8.755388260  | 6.329489708  | O  | 8.106105804  | 8.760979652  | 6.329298496  |
| O  | 6.507232666  | 0.473989725  | 6.995037556  | O  | 6.502090931  | 0.495746851  | 6.964163303  | O  | 6.519952297  | 0.580228329  | 6.973503590  |
| O  | 8.155797958  | 5.787733555  | 9.115950584  | O  | 8.142570496  | 5.817946911  | 9.090622902  | O  | 8.158031464  | 5.902107239  | 9.099446297  |
| O  | 0.139592826  | 6.550483704  | 6.868112564  | O  | 0.159285665  | 6.575169086  | 6.879099369  | O  | 0.128627777  | 6.580832481  | 6.855785847  |
| O  | 4.962218285  | 8.435534477  | 9.085679054  | O  | 4.947838306  | 8.422779083  | 9.030965805  | O  | 5.052579880  | 8.522247314  | 9.056186676  |
| O  | 1.329189539  | 6.333208561  | 9.244915962  | O  | 1.338770747  | 6.281130314  | 9.246830940  | O  | 1.352766156  | 6.311697483  | 9.212012291  |
| O  | -0.640372872 | 1.975200772  | 6.869354248  | O  | -0.641244531 | 1.944845080  | 6.860697746  | O  | 18.101718903 | 1.994560003  | 6.854709148  |
| O  | 6.164463043  | 9.202479362  | 2.367910862  | O  | 6.826426506  | -0.121395998 | 2.354966164  | O  | 6.814914703  | -0.147581369 | 2.350405931  |
| O  | 6.132630825  | 1.616094589  | 9.394463539  | O  | 6.117959023  | 1.606362581  | 9.365993500  | O  | 6.037596703  | 1.758385181  | 9.338929176  |
| O  | 18.045558929 | 6.914103985  | 2.618872881  | O  | 18.066444397 | 6.943144321  | 2.539572716  | O  | 18.045743942 | 6.887773514  | 2.542112827  |
| O  | 1.994194984  | -0.442514062 | 6.938644886  | O  | 1.956542015  | -0.381703824 | 6.852776527  | O  | 2.021792889  | -0.427407563 | 6.821089745  |
| O  | 0.647880673  | 7.876171112  | 4.640207291  | O  | 0.595421553  | 7.852563381  | 4.613530159  | O  | 0.584686399  | 7.841912270  | 4.591112137  |
| O  | 4.061254978  | 0.872499228  | 7.968517303  | O  | 4.049910545  | 0.863723874  | 7.929524899  | O  | 4.045642853  | 0.862299502  | 7.930457592  |
| O  | 7.607541084  | 4.540066719  | 1.216390610  | O  | 7.548984051  | 4.564396381  | 1.226649523  | O  | 7.569543362  | 4.548108578  | 1.231257200  |
| O  | 7.576050282  | 1.017726183  | 4.635311127  | O  | 7.589841366  | 1.050764561  | 4.625569820  | O  | 7.579068661  | 1.034842849  | 4.611520290  |
| O  | 3.966245174  | 8.069251060  | 1.438245773  | O  | 3.979252100  | 8.142415047  | 1.335968137  | O  | 3.976080656  | 8.124907494  | 1.305456758  |
| O  | 0.458080113  | 4.153564930  | 7.980698109  | O  | 0.428555608  | 4.150113106  | 7.946423054  | O  | 0.453195930  | 4.168143272  | 7.923134804  |
| O  | 11.010856628 | 1.775253296  | 8.227958679  | O  | 11.014632225 | 1.801334739  | 8.245348930  | O  | 11.025568008 | 1.820834398  | 8.252044678  |
| O  | 9.454981804  | 0.068666771  | 3.014522791  | O  | 9.440758705  | 0.077402592  | 2.981584787  | O  | 9.433598518  | 0.071131676  | 2.973689318  |
| O  | 17.455499649 | 2.190825939  | 2.256490946  | O  | 17.457387924 | 2.204390764  | 2.242287397  | O  | 17.447664261 | 2.178472281  | 2.213367224  |
| O  | 12.410329819 | 0.297409207  | 0.164195731  | O  | 12.401643753 | 0.315184295  | 0.148832247  | O  | 12.409295082 | 0.326262146  | 0.145097047  |
| O  | 11.001552582 | 8.279507637  | 2.295002937  | O  | 10.995047569 | 8.298074722  | 2.285757065  | O  | 10.991204262 | 8.315761566  | 2.271093130  |
| O  | 9.449303627  | 2.893748999  | 0.142609492  | O  | 9.413620949  | 2.950508356  | 0.112799101  | O  | 9.419981956  | 2.937669754  | 0.109874450  |
| O  | 15.708614349 | 6.947605133  | 0.974953592  | O  | 15.697856903 | 6.960139275  | 0.952016532  | O  | 15.698202133 | 6.945191860  | 0.924085438  |
| O  | 17.573421478 | 8.761965752  | 6.306085587  | O  | 17.526531219 | 8.727583885  | 6.297769070  | O  | 17.576566696 | 8.785497665  | 6.304161549  |
| O  | 15.960237503 | 0.496211648  | 6.981810570  | O  | 15.927711487 | 0.501746297  | 6.946077347  | O  | 15.905205727 | 0.444516003  | 6.888903141  |
| O  | 17.548032761 | 5.901973724  | 9.014431000  | O  | 17.547206879 | 5.912003994  | 9.009030342  | O  | 17.557956696 | 5.907670975  | 9.004379272  |

|   |              |              |              |   |              |              |              |   |              |              |              |
|---|--------------|--------------|--------------|---|--------------|--------------|--------------|---|--------------|--------------|--------------|
| O | 9.517636299  | 6.555853844  | 6.955393314  | O | 9.518750191  | 6.570319653  | 6.939011097  | O | 9.523087502  | 6.567665100  | 6.920153618  |
| O | 14.485237122 | 8.541357040  | 9.117260933  | O | 14.482269287 | 8.512651443  | 9.080750465  | O | 14.477481842 | 8.513019562  | 9.067354202  |
| O | 10.794298172 | 6.266685009  | 9.260503769  | O | 10.782687187 | 6.286882877  | 9.251412392  | O | 10.807320595 | 6.308683395  | 9.227632523  |
| O | 8.719270706  | 1.968587041  | 6.856734276  | O | 8.736323357  | 1.988225579  | 6.842057705  | O | 8.786993027  | 2.001595020  | 6.792746067  |
| O | 15.601312637 | 9.203417778  | 2.402312040  | O | 16.288967133 | -0.177500814 | 2.378288746  | O | 15.596062660 | 9.185829163  | 2.358633518  |
| O | 15.502705574 | 1.765793204  | 9.279447556  | O | 15.527256012 | 1.725465775  | 9.279334068  | O | 15.610598564 | 1.714881539  | 9.198454857  |
| O | 8.741524696  | 6.859955365  | 2.421859264  | O | 8.748911858  | 6.855996132  | 2.450300932  | O | 8.771233559  | 6.841051102  | 2.469239712  |
| O | 11.423732758 | -0.465231478 | 6.825985909  | O | 11.410773277 | -0.439113081 | 6.838052750  | O | 11.402458191 | -0.438204527 | 6.866456509  |
| O | 9.949620247  | 7.723748207  | 4.635848522  | O | 9.954063416  | 7.769701004  | 4.636296749  | O | 9.968344688  | 7.807977200  | 4.640667439  |
| O | 13.468138695 | 0.807418585  | 7.900389671  | O | 13.460341454 | 0.817202568  | 7.916751385  | O | 13.465422630 | 0.830821037  | 7.917295933  |
| O | 16.965112686 | 4.587177277  | 1.264977217  | O | 16.947057724 | 4.594130516  | 1.251946330  | O | 16.929754257 | 4.574281216  | 1.228310704  |
| O | 17.016336441 | 1.076338768  | 4.644290924  | O | 17.022228241 | 1.073096752  | 4.624104023  | O | 17.027088165 | 1.047257185  | 4.590096951  |
| O | 13.405355453 | 8.020432472  | 1.311407208  | O | 13.398612976 | 8.039581299  | 1.311576605  | O | 13.391510010 | 8.020063400  | 1.293109536  |
| O | 9.896017075  | 4.128258228  | 7.934875011  | O | 9.894411087  | 4.146134377  | 7.936606884  | O | 9.862250328  | 4.154343128  | 7.974331379  |
| O | 0.932800889  | 1.080916047  | 17.612632751 | O | 0.921716094  | 1.112201333  | 17.603054047 | O | 0.910330057  | 1.073471069  | 17.605325699 |
| O | -0.622856021 | -0.554276884 | 12.355191231 | O | -0.608060360 | -0.541755676 | 12.327405930 | O | -0.597687900 | -0.550918937 | 12.319175720 |
| O | 7.463275909  | 1.439900875  | 11.700384140 | O | 7.444966316  | 1.465352058  | 11.675384521 | O | 7.380248547  | 1.454995871  | 11.630484581 |
| O | 2.357932329  | -0.386790812 | 9.584527016  | O | 2.307245970  | -0.428123981 | 9.490582466  | O | 2.219451427  | -0.377899140 | 9.474958420  |
| O | 0.859704614  | 7.594397545  | 11.609104156 | O | 0.839955986  | 7.593553543  | 11.566630363 | O | 0.843810141  | 7.538359642  | 11.547450066 |
| O | -0.720030010 | 2.285002708  | 9.521733284  | O | -0.699913561 | 2.273555517  | 9.515258789  | O | -0.640811682 | 2.312520027  | 9.523963928  |
| O | 5.729127407  | 6.326958656  | 10.546401978 | O | 5.680501938  | 6.308264256  | 10.491759300 | O | 5.583313942  | 6.237755299  | 10.304987907 |
| O | 7.447369576  | 7.913499355  | 15.687002182 | O | 7.402308464  | 7.957557201  | 15.725401878 | O | 7.400121689  | 7.982392788  | 15.692271233 |
| O | 5.868030071  | -0.404539049 | 16.372552872 | O | 5.802195072  | -0.239348650 | 16.298721313 | O | 5.787424564  | -0.246655941 | 16.295768738 |
| O | 7.351933002  | 5.101278305  | 18.281419754 | O | 7.354166985  | 5.092327118  | 18.314386368 | O | 7.349904537  | 5.082282543  | 18.320131302 |
| O | -0.566708744 | 5.844917297  | 16.267744064 | O | -0.544770122 | 5.854832649  | 16.244567871 | O | -0.558871031 | 5.843489647  | 16.231189728 |
| O | 4.241540909  | 7.715435028  | 18.446025848 | O | 4.339984894  | 7.755043507  | 18.399414063 | O | 4.380957127  | 7.713651180  | 18.394866943 |
| O | 0.753653288  | 5.571832180  | 18.551193237 | O | 0.717800856  | 5.573902130  | 18.568561554 | O | 0.732631326  | 5.530089378  | 18.537141800 |
| O | -1.348986745 | 1.274295688  | 16.220045090 | O | -1.357551098 | 1.268709540  | 16.197748184 | O | -1.365475416 | 1.264918327  | 16.188497543 |
| O | 5.927128315  | -0.696210206 | 11.754014015 | O | 5.953076363  | -0.710701823 | 11.707887650 | O | 6.108275890  | -0.864508986 | 11.723459244 |
| O | 5.451227188  | 0.948162317  | 18.648145676 | O | 5.407103539  | 1.000014186  | 18.644109726 | O | 5.415580750  | 0.973216653  | 18.642452240 |
| O | 17.392520905 | 6.227626801  | 11.876956940 | O | 17.372573853 | 6.233386993  | 11.872584343 | O | 17.369844437 | 6.220583916  | 11.859552383 |
| O | 1.349614501  | -1.162936807 | 16.211849213 | O | 1.323111057  | -1.130260944 | 16.189781189 | O | 1.336591840  | -1.151051641 | 16.168386459 |
| O | -0.127857625 | 7.123054981  | 13.995265007 | O | -0.128794014 | 7.144058704  | 13.978064537 | O | -0.115908146 | 7.103146553  | 13.955572128 |
| O | 3.381875038  | 0.138142347  | 17.273454666 | O | 3.356685162  | 0.129476905  | 17.287242889 | O | 3.348910332  | 0.072975159  | 17.353824615 |
| O | 6.777899742  | 3.764693737  | 10.676071167 | O | 6.750313282  | 3.775508881  | 10.606370926 | O | 6.870085716  | 3.828139067  | 10.642042160 |
| O | 6.940711021  | 0.227193117  | 14.021418571 | O | 6.947936058  | 0.226194739  | 13.980656624 | O | 6.897566795  | 0.283898711  | 13.975569725 |
| O | 3.290119171  | 7.234021664  | 10.765399933 | O | 3.273759604  | 7.271092415  | 10.734047890 | O | 3.277165413  | 7.404798031  | 10.661666870 |
| O | -0.195804596 | 3.428818941  | 17.322925568 | O | -0.195958614 | 3.435914516  | 17.288721085 | O | -0.199978709 | 3.417342186  | 17.275535583 |
| O | 10.381763458 | 1.051100254  | 17.619533539 | O | 10.350670815 | 1.067159057  | 17.614448547 | O | 10.336453438 | 1.059541702  | 17.583604813 |
| O | 8.591803551  | -0.878301859 | 12.255499840 | O | 8.612549782  | -0.831697583 | 12.200263977 | O | 8.748644829  | -0.653772652 | 12.324433327 |
| O | 16.724172592 | 1.484515309  | 11.636232376 | O | 16.744327545 | 1.495316744  | 11.639635086 | O | 16.788400650 | 1.490329146  | 11.598363876 |
| O | 11.717131615 | -0.447522461 | 9.472982407  | O | 11.707436562 | -0.433763295 | 9.488921165  | O | 11.720287323 | -0.408481002 | 9.511760712  |
| O | 10.236127853 | 7.552206516  | 11.571746826 | O | 10.249956131 | 7.532077312  | 11.593775749 | O | 10.247321129 | 7.511767864  | 11.585867882 |
| O | 8.732795715  | 2.275474787  | 9.506436348  | O | 8.721152306  | 2.278692484  | 9.489812851  | O | 8.687951088  | 2.204950809  | 9.445163727  |

|    |              |              |              |    |              |              |              |    |              |              |              |
|----|--------------|--------------|--------------|----|--------------|--------------|--------------|----|--------------|--------------|--------------|
| O  | 14.984371185 | 6.235172749  | 10.330303192 | O  | 14.981666565 | 6.224146843  | 10.326828957 | O  | 14.975661278 | 6.229495525  | 10.307380676 |
| O  | 16.883562088 | 8.047971725  | 15.713246346 | O  | 16.863466263 | 8.039159775  | 15.707231522 | O  | 16.881366730 | 8.041914940  | 15.666430473 |
| O  | 15.264685631 | -0.246436477 | 16.333755493 | O  | 15.238842010 | -0.220423818 | 16.308055878 | O  | 15.243556023 | -0.247763276 | 16.288246155 |
| O  | 16.937431335 | 5.176232815  | 18.475164413 | O  | 16.910383224 | 5.153952599  | 18.409961700 | O  | 16.914373398 | 5.146432400  | 18.403226852 |
| O  | 8.889449120  | 5.755626202  | 16.234584808 | O  | 8.841832161  | 5.793872356  | 16.249425888 | O  | 8.811035156  | 5.791010857  | 16.240568161 |
| O  | 13.839616776 | 7.759928226  | 18.472316742 | O  | 13.813565254 | 7.765984535  | 18.444849014 | O  | 13.803378105 | 7.757880688  | 18.427818298 |
| O  | 9.994326591  | 5.542263031  | 18.657958984 | O  | 9.998194695  | 5.562432289  | 18.649160385 | O  | 9.986886024  | 5.575313568  | 18.627576828 |
| O  | 8.107778549  | 1.145495534  | 16.236385345 | O  | 8.078931808  | 1.205892682  | 16.204307556 | O  | 8.033646584  | 1.229224324  | 16.198112488 |
| O  | 15.619515419 | -0.926389873 | 11.776029587 | O  | 15.633708000 | -0.919620097 | 11.735916138 | O  | 15.643469810 | -0.903672099 | 11.717457771 |
| O  | 14.854433060 | 0.990162492  | 18.649389267 | O  | 14.834125519 | 0.985474110  | 18.644477844 | O  | 14.833055496 | 0.979299545  | 18.611980438 |
| O  | 8.160645485  | 5.877761364  | 11.975873947 | O  | 8.122718811  | 5.910780907  | 11.933556557 | O  | 7.968234539  | 6.097036839  | 11.932290077 |
| O  | 10.736894608 | -1.219298959 | 16.259880066 | O  | 10.706776619 | -1.191853046 | 16.237998962 | O  | 10.702566147 | -1.212887645 | 16.241430283 |
| O  | 9.358185768  | 7.110720634  | 13.993397713 | O  | 9.274999619  | 7.123951912  | 13.989422798 | O  | 9.295410156  | 7.093825340  | 13.991868973 |
| O  | 12.802568436 | 0.028904438  | 17.295513153 | O  | 12.778420448 | 0.047817826  | 17.279155731 | O  | 12.774398804 | 0.042909741  | 17.257284164 |
| O  | 16.255163193 | 3.871109247  | 10.640014648 | O  | 16.259872437 | 3.861316204  | 10.610188484 | O  | 16.256698608 | 3.855204582  | 10.575916290 |
| O  | 16.349664688 | 0.341191411  | 14.008551598 | O  | 16.342674255 | 0.314960241  | 13.987218857 | O  | 16.355655670 | 0.334612370  | 13.968648911 |
| O  | 12.697165489 | 7.354255199  | 10.753611565 | O  | 12.698159218 | 7.351940155  | 10.738615036 | O  | 12.701000214 | 7.366395950  | 10.748070717 |
| O  | 9.158030510  | 3.360220194  | 17.346004486 | O  | 9.168089867  | 3.391542912  | 17.323102951 | O  | 9.160457611  | 3.389821768  | 17.317071915 |
| O  | 3.419155598  | 2.625018597  | 14.784612656 | O  | 3.255440235  | 2.496142387  | 15.141964912 | O  | 3.052519321  | 2.136080980  | 15.367260933 |
| O  | 3.858996868  | 4.872868061  | 13.808044434 | O  | 3.787655830  | 4.759634972  | 13.643229485 | O  | 3.558753252  | 5.399379253  | 12.833864212 |
| O  | 1.912453890  | 5.047742844  | 12.929388046 | O  | 1.761515975  | 4.911731720  | 12.983296394 | O  | 1.831581116  | 4.365546227  | 13.446640015 |
| O  | 5.349241734  | 2.310561180  | 15.653528214 | O  | 5.345645428  | 2.670404911  | 14.728036880 | O  | 4.681835175  | 2.973093510  | 14.327753067 |
| Cu | 3.507591724  | 3.104664803  | 12.786688805 | Cu | 3.352058172  | 3.166862965  | 12.486997604 | Cu | 2.782019377  | 3.836768389  | 11.758883476 |
| Cu | 4.057523727  | 4.320100307  | 15.795119286 | Cu | 4.180913448  | 3.977098465  | 16.102079391 | Cu | 4.164439678  | 3.622136116  | 16.183683395 |
| H  | 15.070737839 | 6.212933540  | 0.882529914  | H  | 15.056666374 | 6.226898670  | 0.869918764  | H  | 15.060294151 | 6.210575581  | 0.827013850  |
| H  | 2.790054560  | 0.677224994  | 13.009591103 | H  | 2.118809223  | 1.004640341  | 12.804940224 | H  | 1.555800438  | 1.753422022  | 12.433420181 |
| H  | 2.758248806  | 0.989921689  | 11.395278931 | H  | 2.027525425  | 1.302433729  | 11.190746307 | H  | 0.896117926  | 2.228268385  | 10.993851662 |
| H  | 4.188611507  | 0.694550097  | 12.156795502 | H  | 3.420381069  | 0.727252305  | 11.850726128 | H  | 2.287530661  | 1.372705936  | 11.012315750 |
| H  | 3.471057177  | 3.342577457  | 10.230289459 | H  | 3.381340027  | 3.554211140  | 9.949062347  | H  | 3.191884041  | 4.031538010  | 9.274621010  |
| H  | 3.735444069  | 4.813724518  | 10.932100296 | H  | 3.811941624  | 4.937481880  | 10.757737160 | H  | 4.403497219  | 4.808230400  | 10.131905556 |
| H  | 4.980138302  | 3.735426664  | 10.836653709 | H  | 4.917432785  | 3.732388258  | 10.614765167 | H  | 4.452078819  | 3.171259880  | 9.913695335  |
| H  | 14.338412285 | 5.507515907  | 10.235764503 | H  | 14.335924149 | 5.498112679  | 10.221385956 | H  | 14.321624756 | 5.511590958  | 10.193636894 |
| H  | 3.931666374  | 4.316020966  | 18.363080978 | H  | 3.678100586  | 4.311088562  | 18.587814331 | H  | 2.449641705  | 3.729655504  | 18.049076080 |
| H  | 2.420419216  | 4.008684635  | 17.751407623 | H  | 2.491670132  | 3.327531338  | 17.893781662 | H  | 3.640296459  | 2.623885632  | 18.390014648 |
| H  | 3.552598476  | 2.805066586  | 17.777265549 | H  | 4.000865459  | 2.730678320  | 18.245233536 | H  | 3.918482542  | 4.238762379  | 18.669403076 |
| H  | 5.672595024  | 6.256839275  | 15.576481819 | H  | 5.600210190  | 5.952535629  | 15.564022064 | H  | 5.706182480  | 5.457108498  | 15.397386551 |
| H  | 4.787760258  | 6.475465775  | 16.947496414 | H  | 4.747217655  | 6.320727825  | 16.931390762 | H  | 4.759333134  | 6.070332050  | 16.601806641 |
| H  | 6.027356625  | 5.412021160  | 16.958545685 | H  | 6.065190792  | 5.354248047  | 17.050661087 | H  | 6.062261105  | 5.153923988  | 16.998987198 |
| N  | 3.281280279  | 1.173461676  | 12.259926796 | N  | 2.643177748  | 1.377313614  | 12.007077217 | N  | 1.784198046  | 2.119036436  | 11.503945351 |
| N  | 3.949285984  | 3.812344074  | 11.003808022 | N  | 3.897727074  | 3.913887024  | 10.756193161 | N  | 3.806412697  | 3.953301907  | 10.090205193 |
| N  | 3.418178082  | 3.808268785  | 17.615779877 | N  | 3.490106106  | 3.557669640  | 17.906616211 | N  | 3.461512566  | 3.565267086  | 18.022895813 |
| N  | 5.246739388  | 5.762513638  | 16.364873886 | N  | 5.243141174  | 5.564485550  | 16.441926956 | N  | 5.286275864  | 5.241264343  | 16.306324005 |
| N  | 2.711929798  | 5.587451935  | 13.673810959 | N  | 2.644819021  | 5.421991825  | 13.676408768 | N  | 2.680146217  | 5.285883904  | 13.747051239 |
| N  | 4.497304440  | 1.814838052  | 14.929115295 | N  | 4.257807732  | 2.164036274  | 14.378039360 | N  | 3.718160152  | 2.128387451  | 14.278986931 |

| Structure J <sub>1</sub> |              |              |             | ts4 |              |              | Structure K <sub>1</sub> |    |              |              |             |
|--------------------------|--------------|--------------|-------------|-----|--------------|--------------|--------------------------|----|--------------|--------------|-------------|
| Si                       | 0.176622808  | 2.736840248  | 7.981910229 | Si  | 0.324798524  | 2.695982218  | 7.938202858              | Si | 0.336640835  | 2.532080173  | 7.922616959 |
| Si                       | 8.013886452  | 0.882080972  | 2.926664114 | Si  | 8.172534943  | 0.829279125  | 2.860108614              | Si | 8.123180389  | 0.722459614  | 2.855218410 |
| Si                       | 2.463600159  | 8.441513062  | 0.722073853 | Si  | 2.615341902  | 8.395687103  | 0.697816551              | Si | 2.608494759  | 8.246497154  | 0.646501005 |
| Si                       | 5.557578087  | 8.509619713  | 0.969049513 | Si  | 5.705466747  | 8.442656517  | 0.924635708              | Si | 5.745401382  | 8.365392685  | 0.914079547 |
| Si                       | 7.945574284  | 0.773625851  | 6.061697006 | Si  | 8.102632523  | 0.721678555  | 5.993236065              | Si | 8.105870247  | 0.659124851  | 5.976205349 |
| Si                       | 0.156810462  | 5.907711029  | 8.137963295 | Si  | 0.309068263  | 5.863626003  | 8.102870941              | Si | 0.286746204  | 5.700842857  | 8.058463097 |
| Si                       | 0.222632736  | 8.191230774  | 6.020177364 | Si  | 0.381397963  | 8.158519745  | 5.977129459              | Si | 0.398293465  | 8.008832932  | 5.927561283 |
| Si                       | 5.619066238  | 0.665376425  | 8.192033768 | Si  | 5.780601501  | 0.526769221  | 8.115844727              | Si | 5.805505753  | 0.555338264  | 8.107803345 |
| Si                       | 2.513947487  | 0.621843457  | 7.990544319 | Si  | 2.678586006  | 0.577924609  | 7.948013783              | Si | 2.666698694  | 0.429130733  | 7.883606911 |
| Si                       | 0.178255588  | 8.243289948  | 2.932508945 | Si  | 0.321704805  | 8.206347466  | 2.893285275              | Si | 0.360269964  | 8.070349693  | 2.829085112 |
| Si                       | 8.033355713  | 3.177922487  | 0.803323746 | Si  | 8.210344315  | 3.088116884  | 0.732016146              | Si | 8.182676315  | 3.055549622  | 0.672645092 |
| Si                       | 9.599954605  | 2.614192724  | 8.013240814 | Si  | 9.749432564  | 2.579927444  | 7.930378914              | Si | 9.787907600  | 2.503299713  | 7.927194595 |
| Si                       | 17.438589096 | 0.958248377  | 2.922320127 | Si  | 17.576366425 | 0.910165489  | 2.873212337              | Si | 17.590183258 | 0.761191487  | 2.839955568 |
| Si                       | 11.854112625 | 8.333729744  | 0.734037220 | Si  | 11.979206085 | 8.314987183  | 0.671438038              | Si | 11.985960960 | 8.239990234  | 0.666256964 |
| Si                       | 14.953008652 | 8.603214264  | 0.984164953 | Si  | 15.096663475 | 8.567300797  | 0.924345553              | Si | 15.105954170 | 8.425743103  | 0.897911906 |
| Si                       | 17.386610031 | 0.890707850  | 6.037328720 | Si  | 17.533210754 | 0.860020638  | 5.984782696              | Si | 17.554395676 | 0.662105918  | 5.960968971 |
| Si                       | 9.570430756  | 5.784199715  | 8.172175407 | Si  | 9.673960686  | 5.732131004  | 8.090364456              | Si | 9.700202942  | 5.650629520  | 8.056097984 |
| Si                       | 9.618370056  | 8.073569298  | 6.044198990 | Si  | 9.788548470  | 8.020440102  | 5.958975315              | Si | 9.757648468  | 7.971960545  | 5.939297676 |
| Si                       | 15.067571640 | 0.650286436  | 8.146378517 | Si  | 15.215159416 | 0.627383411  | 8.095908165              | Si | 15.230977058 | 0.468029082  | 8.056882858 |
| Si                       | 11.933256149 | 0.492418587  | 7.980286598 | Si  | 12.078428268 | 0.454377770  | 7.895365238              | Si | 12.083141327 | 0.391860783  | 7.877719402 |
| Si                       | 9.562895775  | 8.147277832  | 2.927594185 | Si  | 9.746497154  | 8.067604065  | 2.848590136              | Si | 9.768041611  | 8.073486328  | 2.830835342 |
| Si                       | 17.406425476 | 3.225535393  | 0.731963634 | Si  | 17.549362183 | 3.190429926  | 0.683027923              | Si | 17.553642273 | 3.040141582  | 0.656342149 |
| Al                       | 7.874330044  | 6.375791073  | 0.949587405 | Al  | 8.030879021  | 6.276447296  | 0.868808329              | Al | 8.070604324  | 6.251982212  | 0.822365522 |
| Al                       | 17.464431763 | 6.362595558  | 0.996013403 | Al  | 17.602212906 | 6.324791908  | 0.946484506              | Al | 17.602643967 | 6.174968243  | 0.861679077 |
| O                        | 1.625518680  | 1.984760404  | 8.062265396 | O   | 1.770472765  | 1.930218101  | 8.027459145              | O  | 1.810730457  | 1.819056749  | 8.053981781 |
| O                        | 0.055248335  | 0.271425456  | 2.845230579 | O   | 0.201955184  | 0.233164743  | 2.814469814              | O  | 0.206560940  | 0.077500194  | 2.727599621 |
| O                        | 8.103090286  | 2.338029385  | 2.204633713 | O   | 8.316002846  | 2.280955791  | 2.145954609              | O  | 8.159696579  | 2.083406210  | 1.973784924 |
| O                        | 2.324085712  | -0.229507029 | 9.363285065 | O   | 2.491117001  | -0.289937347 | 9.312790871              | O  | 2.415573120  | -0.486904979 | 9.203911781 |
| O                        | 1.501806259  | 8.409220695  | 2.013704062 | O   | 1.658175349  | 8.382044792  | 1.991933227              | O  | 1.736308217  | 8.306748390  | 1.999868751 |
| O                        | -0.664817333 | 2.421062469  | 9.348318100 | O   | -0.515716314 | 2.397423267  | 9.306575775              | O  | -0.502426028 | 2.247609615  | 9.295739174 |
| O                        | 6.324238300  | 7.131591320  | 0.697838068 | O   | 6.462532520  | 7.049768925  | 0.738094687              | O  | 6.497071266  | 6.979804516  | 0.651624560 |
| O                        | 8.188529968  | 8.850344658  | 6.239371300 | O   | 8.352434158  | 8.801095963  | 6.142748833              | O  | 8.280929565  | 8.665095329  | 6.088442326 |
| O                        | 6.518955708  | 0.578767896  | 6.827048302 | O   | 6.656602383  | 0.435689270  | 6.726488590              | O  | 6.669486046  | 0.418510854  | 6.729066372 |
| O                        | 8.170615196  | 5.969062328  | 8.910784721 | O   | 8.224757195  | 5.859477043  | 8.749941826              | O  | 8.222429276  | 5.751053333  | 6.668963432 |
| O                        | 0.124393523  | 6.729164124  | 6.722607136 | O   | 0.297093064  | 6.705951214  | 6.701813221              | O  | 0.387942225  | 6.578303337  | 6.691993237 |
| O                        | 4.985228539  | 8.625444412  | 8.926307678 | O   | 5.060618401  | 8.468540192  | 8.825061798              | O  | 5.278766155  | 8.607316017  | 8.986205101 |
| O                        | 1.410317183  | 6.503032207  | 9.028261185 | O   | 1.552258372  | 6.447908401  | 9.017428398              | O  | 1.475049496  | 6.212008953  | 9.095474243 |
| O                        | -0.676809192 | 2.166002512  | 6.700767517 | O   | -0.538711309 | 2.139758587  | 6.657678604              | O  | -0.491810739 | 1.914818287  | 6.653758049 |
| O                        | 6.872514725  | 0.001621276  | 2.189601183 | O   | 6.993334293  | -0.015681133 | 2.118186951              | O  | 6.280784607  | 9.128589630  | 2.261695385 |
| O                        | 6.195403099  | 1.829284430  | 9.161702156 | O   | 6.421965122  | 1.617535830  | 9.113965988              | O  | 6.340609550  | 1.852575064  | 8.946713448 |
| O                        | 18.072237015 | 7.044176102  | 2.444665194 | O   | -0.613779783 | 7.011848927  | 2.381541252              | O  | -0.518948972 | 6.865591526  | 2.248505354 |
| O                        | 2.073861361  | -0.290372103 | 6.717685699 | O   | 2.234093189  | -0.321483403 | 6.669069767              | O  | 2.192356110  | -0.360725343 | 6.554136753 |
| O                        | 0.649479508  | 8.001188278  | 4.472082615 | O   | 0.794181645  | 7.942582607  | 4.429070473              | O  | 0.761550426  | 7.774590969  | 4.374633312 |

|    |              |              |             |    |              |              |             |    |              |              |             |
|----|--------------|--------------|-------------|----|--------------|--------------|-------------|----|--------------|--------------|-------------|
| O  | 4.085314274  | 1.047967911  | 7.771959305 | O  | 4.253361702  | 1.007195950  | 7.738623619 | O  | 4.238489628  | 0.856399894  | 7.750551224 |
| O  | 7.645032883  | 4.675228596  | 1.141910672 | O  | 7.705384254  | 4.572854042  | 0.966562569 | O  | 7.852231503  | 4.546446323  | 1.138622880 |
| O  | 7.641248703  | 1.142026305  | 4.504488945 | O  | 7.758409500  | 1.050837278  | 4.434691906 | O  | 7.793876648  | 1.033079863  | 4.424221039 |
| O  | 3.981632710  | 8.249737740  | 1.236786366 | O  | 4.126015663  | 8.180271149  | 1.240922809 | O  | 4.154876709  | 8.041339874  | 1.071054220 |
| O  | 0.463711977  | 4.329392910  | 7.797219276 | O  | 0.639314950  | 4.288568974  | 7.749894619 | O  | 0.618050337  | 4.125131607  | 7.715012074 |
| O  | 11.036441803 | 1.849025965  | 8.045832634 | O  | 11.183298111 | 1.810388088  | 7.938919544 | O  | 11.247768402 | 1.776798248  | 8.023059845 |
| O  | 9.483030319  | 0.192631364  | 2.843590260 | O  | 9.602614403  | 0.081938773  | 2.788866520 | O  | 9.610927582  | 0.071011707  | 2.779054403 |
| O  | 17.471149445 | 2.351891994  | 2.106282949 | O  | 17.613687515 | 2.292953014  | 2.040739775 | O  | 17.598247528 | 2.156567574  | 2.025024414 |
| O  | 11.711556435 | -0.355390310 | 9.359492302 | O  | 11.842776299 | -0.385461032 | 9.274827003 | O  | 11.851105690 | -0.488356888 | 9.229817390 |
| O  | 10.942946434 | 8.286605835  | 2.062638760 | O  | 11.145238876 | 8.347908974  | 2.044443846 | O  | 11.182418823 | 8.343094826  | 2.059059858 |
| O  | 9.484463692  | 3.042559624  | 0.027743708 | O  | 8.971944809  | 2.266548634  | 9.325885773 | O  | 8.957883835  | 2.208726883  | 9.302725792 |
| O  | 15.716614723 | 7.083803654  | 0.841627061 | O  | 15.860107422 | 7.043356419  | 0.782105148 | O  | 15.852434158 | 6.892518997  | 0.777129412 |
| O  | 18.310567856 | -0.445497930 | 6.158804893 | O  | -0.369260758 | -0.469237834 | 6.093497753 | O  | -1.083915710 | 8.700828552  | 6.070345879 |
| O  | 15.967506409 | 0.599229872  | 6.798647404 | O  | 16.120908737 | 0.564677894  | 6.750798225 | O  | 16.125152588 | 0.403289855  | 6.706617355 |
| O  | 17.607088089 | 6.070388317  | 8.923812866 | O  | -1.086182833 | 6.020695686  | 8.876159668 | O  | 17.681997299 | 5.850652695  | 8.740583420 |
| O  | 9.537555695  | 6.600662231  | 6.740373135 | O  | 9.711712837  | 6.565066338  | 6.676039696 | O  | 9.798029900  | 6.519200325  | 6.669044495 |
| O  | 14.508313179 | 8.605515480  | 8.936684608 | O  | 14.684916496 | 8.594623566  | 8.898560524 | O  | 14.702049255 | 8.435976982  | 8.863950729 |
| O  | 10.828747749 | 6.364156723  | 9.073576927 | O  | 10.878114700 | 6.332911491  | 9.059477806 | O  | 10.840682983 | 6.241871834  | 9.100951195 |
| O  | 8.701863289  | 2.090851068  | 6.725189209 | O  | 8.815052032  | 2.035067081  | 6.674695969 | O  | 8.932018280  | 1.888831973  | 6.671648026 |
| O  | 16.301364899 | -0.033157766 | 2.238708973 | O  | 16.445131302 | -0.089891449 | 2.195943117 | O  | 15.759816170 | 9.161488533  | 2.171479940 |
| O  | 15.572723389 | 1.832479239  | 9.122769356 | O  | 15.715433121 | 1.826687336  | 9.058212280 | O  | 15.739010811 | 1.659171343  | 9.021102905 |
| O  | 8.632081032  | 6.946561813  | 2.422642946 | O  | 8.933402061  | 6.851406574  | 2.231797218 | O  | 8.974323273  | 6.861537457  | 2.170181990 |
| O  | 11.489724159 | -0.427412719 | 6.715734959 | O  | 11.656369209 | -0.459823489 | 6.621458530 | O  | 11.576656342 | -0.435518682 | 6.576223373 |
| O  | 9.978996277  | 7.866762161  | 4.482777596 | O  | 10.148276329 | 7.786598682  | 4.406378269 | O  | 10.141896248 | 7.720438957  | 4.385752678 |
| O  | 13.498788834 | 0.896300137  | 7.788921833 | O  | 13.649695396 | 0.860988379  | 7.735236645 | O  | 13.668914795 | 0.716859639  | 7.692868233 |
| O  | 16.960237503 | 4.721357346  | 1.075341582 | O  | 17.119590759 | 4.684225559  | 1.047658205 | O  | 17.109132767 | 4.535867214  | 0.999579251 |
| O  | 17.032207489 | 1.217136621  | 4.477823734 | O  | 17.174564362 | 1.194306970  | 4.426672459 | O  | 17.214588165 | 1.017774463  | 4.404429913 |
| O  | 13.415617943 | 8.169985771  | 1.221571684 | O  | 13.558135033 | 8.136209488  | 1.110581875 | O  | 13.561454773 | 8.015795708  | 1.084930897 |
| O  | 9.870617867  | 4.206979752  | 7.802778244 | O  | 10.028637886 | 4.166530132  | 7.719449043 | O  | 10.080682755 | 4.090954304  | 7.714226246 |
| O  | 5.923511505  | 7.350802422  | 4.812540531 | O  | 4.720882416  | 7.162135124  | 5.184523106 | O  | 4.001214981  | 6.688839912  | 6.501922131 |
| O  | 4.443537712  | 6.006611824  | 4.046345711 | O  | 4.542089939  | 5.729879856  | 3.333850145 | O  | 6.849084854  | 4.080982685  | 4.499454975 |
| H  | 15.087619781 | 6.341481686  | 0.752417743 | H  | 15.223229408 | 6.307922363  | 0.690055609 | H  | 15.214742661 | 6.157020569  | 0.697569609 |
| H  | 4.507741451  | 7.206781387  | 6.926865578 | H  | 3.849439144  | 6.649628639  | 7.367105007 | H  | 3.604585409  | 5.403781414  | 0.153090239 |
| H  | 3.816229105  | 5.719283104  | 7.029798985 | H  | 3.573785782  | 5.042508602  | 7.546277523 | H  | 3.473122358  | 3.265915871  | 8.828706741 |
| H  | 5.018662930  | 6.163820267  | 8.088964462 | H  | 4.728211403  | 5.789726257  | 8.481122971 | H  | 5.159274101  | 4.908951759  | 0.457179636 |
| H  | 8.483139992  | 4.986487389  | 5.162581444 | H  | 8.018827438  | 5.721102715  | 5.209501266 | H  | 9.721738815  | 5.097853661  | 4.377639771 |
| H  | 7.515495300  | 4.219760895  | 4.067851543 | H  | 7.118174553  | 4.926033497  | 4.111205578 | H  | 8.638136864  | 4.568202496  | 3.049659491 |
| H  | 7.842517376  | 5.819992542  | 3.900952578 | H  | 5.243699074  | 7.989636898  | 5.244915485 | H  | 4.642278671  | 7.414975166  | 6.416667461 |
| H  | 5.429880142  | 3.099997044  | 6.154030800 | H  | 5.469689846  | 2.990307570  | 6.404456615 | H  | 6.067914009  | 4.197409153  | 6.110543251 |
| H  | 6.980667114  | 3.295090199  | 6.658100605 | H  | 7.065472126  | 3.383385420  | 6.534878254 | H  | 6.791567326  | 4.937640667  | 7.411068439 |
| H  | 5.741236210  | 3.725980997  | 7.636450768 | H  | 6.057866573  | 3.569615126  | 7.826508522 | H  | 6.055837154  | 3.479929686  | 7.629148483 |
| Cu | 6.062911987  | 5.569371223  | 5.773085594 | Cu | 5.715399265  | 5.530017853  | 6.149652481 | Cu | 4.359689713  | 5.353893757  | 7.622206211 |
| N  | 4.704522610  | 6.220857620  | 7.107060432 | N  | 4.308662891  | 5.753447056  | 7.537946224 | N  | 3.739278793  | 4.214298248  | 9.107113838 |
| N  | 7.632918835  | 5.088287354  | 4.599581242 | N  | 7.064426422  | 5.646729469  | 4.835875988 | N  | 8.882087708  | 4.627640724  | 4.050558090 |



|   |             |             |             |   |             |             |             |   |             |             |             |
|---|-------------|-------------|-------------|---|-------------|-------------|-------------|---|-------------|-------------|-------------|
| N | 4.944732666 | 7.147092342 | 3.985617161 | N | 5.145931721 | 6.689080238 | 3.592375994 | N | 7.950919151 | 4.475815296 | 4.949643135 |
| N | 6.053668976 | 3.734758854 | 6.661411285 | N | 6.120704174 | 3.670690536 | 6.807754040 | N | 5.975327492 | 4.372772217 | 7.133934498 |

| Structure L <sub>1</sub> |              |              |             | Structure A |              |              |             |
|--------------------------|--------------|--------------|-------------|-------------|--------------|--------------|-------------|
| Si                       | 0.344252110  | 2.507693052  | 7.947758198 | Si          | 0.082571745  | 2.671322107  | 8.037472725 |
| Si                       | 8.145228386  | 0.693387091  | 2.867711067 | Si          | 7.870397091  | 0.855011404  | 3.000867367 |
| Si                       | 2.623173714  | 8.203776360  | 0.680256426 | Si          | 2.365613699  | 8.359323502  | 0.764512300 |
| Si                       | 5.743941784  | 8.348475456  | 0.932881713 | Si          | 5.501899242  | 8.511999130  | 1.069970012 |
| Si                       | 8.114080429  | 0.648447692  | 6.005602837 | Si          | 7.850375175  | 0.825757861  | 6.114461422 |
| Si                       | 0.310952485  | 5.665275574  | 8.097093582 | Si          | 0.055215299  | 5.829790592  | 8.200046539 |
| Si                       | 0.387456059  | 7.966569901  | 5.969029427 | Si          | 0.119889230  | 8.143510818  | 6.067290783 |
| Si                       | 5.798166275  | 0.499621928  | 8.117413521 | Si          | 5.548678875  | 0.684216142  | 8.247546196 |
| Si                       | 2.669386148  | 0.395143092  | 7.933836937 | Si          | 2.404592991  | 0.553648055  | 8.028228760 |
| Si                       | 0.363924384  | 8.035750389  | 2.882694006 | Si          | 0.097282872  | 8.198137283  | 2.982678413 |
| Si                       | 8.173163414  | 3.029016972  | 0.720750272 | Si          | 7.890789032  | 3.197973251  | 0.810515642 |
| Si                       | 9.784402847  | 2.482158899  | 7.968711853 | Si          | 9.527779579  | 2.647067785  | 8.100582123 |
| Si                       | 17.615589142 | 0.736100018  | 2.885472775 | Si          | 17.355733871 | 0.908293366  | 2.980627060 |
| Si                       | 12.015176773 | 8.169704437  | 0.717839420 | Si          | 11.744167328 | 8.354942322  | 0.811327398 |
| Si                       | 15.117057800 | 8.397954941  | 0.950680315 | Si          | 14.851133347 | 8.570522308  | 1.035558701 |
| Si                       | 17.550422668 | 0.645701289  | 5.993849277 | Si          | 17.282201767 | 0.819376111  | 6.083781242 |
| Si                       | 9.751897812  | 5.609043121  | 8.131250381 | Si          | 9.452945709  | 5.807182789  | 8.245150566 |
| Si                       | 9.753562927  | 7.930821419  | 6.021000385 | Si          | 9.486872673  | 8.103783607  | 6.105915546 |
| Si                       | 15.229272842 | 0.455977201  | 8.110417366 | Si          | 14.962629318 | 0.618885756  | 8.204342842 |
| Si                       | 12.088043213 | 0.341863513  | 7.973119259 | Si          | 11.818367004 | 0.534840941  | 8.084904671 |
| Si                       | 9.741707802  | 7.945148945  | 2.913956404 | Si          | 9.466479301  | 8.162605286  | 3.019550800 |
| Si                       | 17.570529938 | 3.018510103  | 0.700918972 | Si          | 17.300975800 | 3.184768915  | 0.797843516 |
| Al                       | 8.071905136  | 6.176043034  | 0.979470372 | Al          | 7.792209148  | 6.358871460  | 1.069876075 |
| Al                       | 17.611293793 | 6.148739815  | 0.926126540 | Al          | 17.342044830 | 6.316263199  | 1.031764984 |
| O                        | 1.816954374  | 1.787644148  | 8.071962357 | O           | 1.541470766  | 1.937211514  | 8.165376663 |
| O                        | 0.239630744  | 0.062080175  | 2.811242342 | O           | -0.017184079 | 0.232500196  | 2.917158842 |
| O                        | 8.240512848  | 2.106011391  | 2.064887285 | O           | 7.862960339  | 2.187500477  | 2.089058876 |
| O                        | 2.447467327  | -0.503667653 | 9.272014618 | O           | 2.152827978  | -0.359137118 | 9.350070000 |
| O                        | 1.725210071  | 8.237092018  | 2.017741442 | O           | 1.454871893  | 8.361573219  | 2.102689028 |
| O                        | -0.495546341 | 2.228694916  | 9.320097923 | O           | -0.087842070 | 3.135429382  | 0.034331582 |
| O                        | 6.554544449  | 6.991638184  | 0.738675714 | O           | 6.230596542  | 7.110515594  | 0.821882069 |
| O                        | 8.293234825  | 8.668647766  | 6.139335632 | O           | 7.990444660  | 8.805073738  | 6.166611671 |
| O                        | 6.660667896  | 0.414939642  | 6.729151249 | O           | 6.421625614  | 0.589280665  | 6.862112522 |
| O                        | 8.346324921  | 5.690530777  | 8.900897980 | O           | 8.058469772  | 5.941717148  | 9.006511688 |
| O                        | 0.337269276  | 6.529574394  | 6.718331337 | O           | 0.069413066  | 6.715001106  | 6.831441879 |
| O                        | 5.227582455  | 8.506758690  | 8.932893753 | O           | 5.782104015  | -0.608583748 | 9.185853004 |
| O                        | 1.529927969  | 6.194223881  | 9.083587646 | O           | 1.294368505  | 6.347942829  | 9.164402962 |
| O                        | -0.484786630 | 1.895902872  | 6.677072048 | O           | 18.087167740 | 2.071126461  | 6.761351109 |
| O                        | 6.232544422  | 9.212098122  | 2.240824223 | O           | 6.715524673  | -0.173350036 | 2.468158245 |
| O                        | 6.365132332  | 1.729941368  | 9.013400078 | O           | 6.087315083  | 2.011400938  | 9.039411545 |
| O                        | -0.560797572 | 6.852216721  | 2.329630613 | O           | 17.987474442 | 7.027421951  | 2.445378304 |

|    |              |              |             |    |              |              |             |
|----|--------------|--------------|-------------|----|--------------|--------------|-------------|
| O  | 2.191821814  | -0.435409367 | 6.631294250 | O  | 1.927423000  | -0.245214522 | 6.699535370 |
| O  | 0.787019491  | 7.738043785  | 4.422278404 | O  | 0.544518352  | 7.907811165  | 4.522287846 |
| O  | 4.236807346  | 0.837330937  | 7.759239674 | O  | 3.982251644  | 0.962466598  | 7.881797791 |
| O  | 7.683042049  | 4.488478661  | 1.127904534 | O  | 7.526241302  | 4.663521290  | 1.290146589 |
| O  | 7.830113411  | 1.015466928  | 4.442069530 | O  | 7.524732590  | 1.241940856  | 4.567539215 |
| O  | 4.165188313  | 7.993936062  | 1.120940924 | O  | 3.909008265  | 8.233305931  | 1.239015698 |
| O  | 0.637286842  | 4.095538616  | 7.729260445 | O  | 0.370193660  | 4.261023045  | 7.817825317 |
| O  | 11.215549469 | 1.707135201  | 8.077679634 | O  | 10.988291740 | 1.928237200  | 8.207122803 |
| O  | 9.580533981  | -0.058702722 | 2.747017384 | O  | 9.357587814  | 0.200971797  | 2.949158192 |
| O  | 17.639791489 | 2.122795343  | 2.059088945 | O  | 17.388605118 | 2.302442551  | 2.166466475 |
| O  | 11.882517815 | -0.517160177 | 9.349055290 | O  | 12.301293373 | 0.414534539  | 0.087354898 |
| O  | 11.119093895 | 8.136240005  | 2.055237532 | O  | 10.832489967 | 8.321606636  | 2.135818958 |
| O  | 8.949061394  | 2.242572308  | 9.351234436 | O  | 9.375411987  | 3.099874258  | 0.094497755 |
| O  | 15.864307404 | 6.869554043  | 0.785174131 | O  | 15.589963913 | 7.037829876  | 0.885573745 |
| O  | -1.084064960 | 8.684729576  | 6.086439133 | O  | 17.483150482 | 8.852722168  | 6.164237022 |
| O  | 16.130563736 | 0.386404455  | 6.762089729 | O  | 15.865661621 | 0.564765751  | 6.859990597 |
| O  | -1.109295607 | 5.818329334  | 8.829826355 | O  | 17.480512619 | 5.980514050  | 8.943924904 |
| O  | 9.689268112  | 6.483919621  | 6.749528408 | O  | 9.389904976  | 6.650104046  | 6.830941677 |
| O  | 14.679961205 | 8.421506882  | 8.917539597 | O  | 14.413451195 | 8.573599815  | 8.990653038 |
| O  | 10.973886490 | 6.202885628  | 9.066943169 | O  | 10.711482048 | 6.401458740  | 9.135478973 |
| O  | 8.908948898  | 1.892738819  | 6.710084438 | O  | 8.701085091  | 2.026499748  | 6.818941593 |
| O  | 15.799265862 | 9.126276970  | 2.211522102 | O  | 16.231733322 | -0.086522691 | 2.284570217 |
| O  | 15.742185593 | 1.650068283  | 9.072220802 | O  | 15.461460114 | 1.796617150  | 9.191384315 |
| O  | 8.884101868  | 6.676320076  | 2.440454960 | O  | 8.540099144  | 6.961946011  | 2.525276899 |
| O  | 10.904287338 | 8.858511925  | 6.703601837 | O  | 11.265906334 | -0.326903462 | 6.824713707 |
| O  | 10.167805672 | 7.733423233  | 4.471084595 | O  | 9.936620712  | 7.909464836  | 4.567448139 |
| O  | 13.663834572 | 0.705148637  | 7.752186298 | O  | 13.394645691 | 0.861679316  | 7.838939667 |
| O  | 17.132160187 | 4.508553028  | 1.072429299 | O  | 16.852931976 | 4.676007271  | 1.158832550 |
| O  | 17.206241608 | 1.007594109  | 4.438378334 | O  | 16.921844482 | 1.171617270  | 4.529961109 |
| O  | 13.578661919 | 7.985656738  | 1.192764640 | O  | 13.308407784 | 8.173120499  | 1.286789298 |
| O  | 10.097787857 | 4.059324265  | 7.724758625 | O  | 9.766206741  | 4.239987850  | 7.847235203 |
| O  | 4.114908695  | 6.558527470  | 6.334192276 | O  | 3.726181984  | 7.159702778  | 6.729632854 |
| O  | 7.783275604  | 4.597748756  | 4.446848869 | H  | 14.951359749 | 6.303038120  | 0.805379391 |
| H  | 15.222576141 | 6.136224270  | 0.711798966 | H  | 3.108416080  | 5.372612000  | 8.102687836 |
| H  | 4.015838623  | 5.424667835  | 0.103501514 | H  | 3.883536339  | 3.902480125  | 8.122495651 |
| H  | 3.565804958  | 3.266056538  | 8.654651642 | H  | 4.519310951  | 5.212402821  | 8.938459396 |
| H  | 5.483227730  | 4.660662174  | 0.210104704 | H  | 3.606349468  | 7.750836372  | 5.967262745 |
| H  | 8.139060020  | 5.331068516  | 3.901540756 | H  | 5.271135807  | 7.287295341  | 4.387693405 |
| H  | 7.790809631  | 3.832153082  | 3.844606400 | H  | 6.558032036  | 7.411735058  | 5.395066261 |
| H  | 4.595330238  | 7.403825283  | 6.350542545 | H  | 6.492193699  | 6.199664116  | 4.290284634 |
| H  | 6.684600830  | 4.574057102  | 6.012951374 | H  | 6.216609955  | 3.637762070  | 5.612728119 |
| H  | 7.071214676  | 4.939056873  | 7.585971832 | H  | 7.294341087  | 4.592564106  | 6.392873764 |
| H  | 6.418904781  | 3.467969179  | 7.232008934 | H  | 6.267564774  | 3.648768187  | 7.254272461 |
| Cu | 4.627903938  | 5.266340256  | 7.437070370 | Cu | 4.961165905  | 5.787171841  | 6.501441479 |

|   |              |             |             |   |             |             |             |
|---|--------------|-------------|-------------|---|-------------|-------------|-------------|
| N | 4.017401695  | 4.140221119 | 8.941965103 | N | 4.024553299 | 4.914298058 | 8.082682610 |
| N | 11.652682304 | 4.598212719 | 4.195065975 | N | 5.922279358 | 6.736082077 | 4.952722073 |
| N | 12.162637711 | 4.583230019 | 5.184813976 | N | 6.329616547 | 4.250650406 | 6.426143169 |
| N | 6.369838238  | 4.461822510 | 6.995263577 |   |             |             |             |

**Table S6.** Cartesian coordinates of RC, TS, IM, and PC for cycle II. The structures from A to F are the same as those in Table S5.

| Structure G <sub>1</sub> |              |              |              | Structure H <sub>2</sub> |              |              |              | ts3 |              |              |              |
|--------------------------|--------------|--------------|--------------|--------------------------|--------------|--------------|--------------|-----|--------------|--------------|--------------|
| Si                       | 0.127521813  | 2.641449928  | 8.094452858  | Si                       | 0.113862276  | 2.664176941  | 8.092165947  | Si  | 0.136661828  | 2.695935726  | 8.102260590  |
| Si                       | 7.945889950  | 0.802341163  | 3.017595291  | Si                       | 7.921969891  | 0.813450456  | 3.029660940  | Si  | 7.974413395  | 0.836480618  | 3.021285772  |
| Si                       | 2.398298740  | 8.311174393  | 0.805331171  | Si                       | 2.384796143  | 8.307554245  | 0.817342281  | Si  | 2.409290791  | 8.346792221  | 0.818703234  |
| Si                       | 5.531866074  | 8.424050331  | 1.060423255  | Si                       | 5.518944740  | 8.439457893  | 1.082177758  | Si  | 5.555300713  | 8.464070320  | 1.058762550  |
| Si                       | 7.890388966  | 0.785078645  | 6.141847610  | Si                       | 7.873642445  | 0.807511806  | 6.153990269  | Si  | 7.910598278  | 0.800507069  | 6.148369789  |
| Si                       | 0.076506793  | 5.810199261  | 8.233730316  | Si                       | 0.054988325  | 5.830817223  | 8.248012543  | Si  | 0.067258477  | 5.864031315  | 8.241390228  |
| Si                       | 0.172180235  | 8.115809441  | 6.119307518  | Si                       | 0.135983139  | 8.134983063  | 6.126774311  | Si  | 0.193655163  | 8.161922455  | 6.142655373  |
| Si                       | 5.602657795  | 0.555753767  | 8.280886650  | Si                       | 5.583258152  | 0.567475736  | 8.292941093  | Si  | 5.612228394  | 0.589678526  | 8.275927544  |
| Si                       | 2.456231356  | 0.535198867  | 8.094388008  | Si                       | 2.424611092  | 0.548247993  | 8.093068123  | Si  | 2.494445801  | 0.592446804  | 8.097721100  |
| Si                       | 0.129724219  | 8.171380043  | 3.024477482  | Si                       | 0.112738669  | 8.178673744  | 3.028048992  | Si  | 0.143415958  | 8.194975853  | 3.035605907  |
| Si                       | 7.938280582  | 3.110564947  | 0.856769025  | Si                       | 7.918601513  | 3.115142822  | 0.867269695  | Si  | 7.957462788  | 3.135267258  | 0.867346108  |
| Si                       | 9.565783501  | 2.629895687  | 8.080441475  | Si                       | 9.534361839  | 2.654852629  | 8.087147713  | Si  | 9.580582619  | 2.644783735  | 8.059148788  |
| Si                       | 17.390504837 | 0.875877738  | 3.019397020  | Si                       | 17.383039474 | 0.884857059  | 3.018907309  | Si  | 17.405334473 | 0.899498224  | 3.020066261  |
| Si                       | 11.784244537 | 8.306998253  | 0.850756168  | Si                       | 11.769152641 | 8.314283371  | 0.875273347  | Si  | 11.783845901 | 8.331174850  | 0.866253197  |
| Si                       | 14.896564484 | 8.541965485  | 1.083332896  | Si                       | 14.882542610 | 8.549106598  | 1.089660048  | Si  | 14.903870583 | 8.562890053  | 1.087159753  |
| Si                       | 17.333742142 | 0.786396384  | 6.139757156  | Si                       | 17.312789917 | 0.806720972  | 6.145930767  | Si  | 17.355165482 | 0.842094779  | 6.157843113  |
| Si                       | 9.478164673  | 5.751043320  | 8.277019501  | Si                       | 9.449849129  | 5.771248817  | 8.302216530  | Si  | 9.504235268  | 5.764867306  | 8.289351463  |
| Si                       | 9.524212837  | 8.059147835  | 6.151535034  | Si                       | 9.505778313  | 8.082924843  | 6.171383381  | Si  | 9.560045242  | 8.070333481  | 6.156640053  |
| Si                       | 14.999542236 | 0.604417562  | 8.237822533  | Si                       | 14.978718758 | 0.615506411  | 8.248372078  | Si  | 15.022272110 | 0.635859668  | 8.252821922  |
| Si                       | 11.860951424 | 0.486040533  | 8.089275360  | Si                       | 11.834476471 | 0.514015019  | 8.103273392  | Si  | 11.883734703 | 0.498922706  | 8.065793037  |
| Si                       | 9.530570984  | 8.101600647  | 3.047048569  | Si                       | 9.519702911  | 8.102743149  | 3.066443920  | Si  | 9.562565804  | 8.113262177  | 3.046588659  |
| Si                       | 17.329494476 | 3.150858164  | 0.832517147  | Si                       | 17.313720703 | 3.160943985  | 0.835009098  | Si  | 17.333320618 | 3.178730488  | 0.841761589  |
| Si                       | -0.580068111 | 1.878814936  | 17.449310303 | Si                       | -0.587179899 | 1.879572511  | 17.453897476 | Si  | -0.561923742 | 1.914010286  | 17.466516495 |
| Si                       | 7.235664368  | 0.081426084  | 12.367868423 | Si                       | 7.225497246  | 0.092192709  | 12.373921394 | Si  | 7.252897739  | 0.103415191  | 12.364221573 |
| Si                       | 1.692112327  | 7.612586498  | 10.201599121 | Si                       | 1.678682923  | 7.632678986  | 10.198249817 | Si  | 1.723731756  | 7.682274342  | 10.217260361 |
| Si                       | 4.824754715  | 7.724151134  | 10.447592735 | Si                       | 4.822053432  | 7.738743782  | 10.446078300 | Si  | 4.837999821  | 7.747031212  | 10.442342758 |
| Si                       | 7.191559792  | 0.016529799  | 15.501686096 | Si                       | 7.179361820  | 0.025730491  | 15.508445740 | Si  | 7.209509373  | 0.038675308  | 15.498338699 |
| Si                       | -0.585471272 | 5.049666405  | 17.610336304 | Si                       | -0.592184782 | 5.047805309  | 17.615421295 | Si  | -0.568102121 | 5.081943989  | 17.627441406 |
| Si                       | -0.567244112 | 7.353618145  | 15.475489616 | Si                       | -0.575327456 | 7.354780674  | 15.479228973 | Si  | -0.567707539 | 7.394595623  | 15.488675117 |
| Si                       | 4.877169132  | -0.163051605 | 17.617805481 | Si                       | 4.867454529  | -0.160755515 | 17.634204865 | Si  | 4.904014111  | -0.156509995 | 17.631669998 |
| Si                       | 1.726982117  | -0.234724879 | 17.436784744 | Si                       | 1.714589953  | -0.235379577 | 17.448474884 | Si  | 1.735169411  | -0.206805348 | 17.459300995 |
| Si                       | -0.564395785 | 7.449433327  | 12.388731956 | Si                       | -0.558355629 | 7.450049400  | 12.396733284 | Si  | -0.533629000 | 7.488828182  | 12.392742157 |
| Si                       | 7.301724434  | 2.375024319  | 10.245479584 | Si                       | 7.255785942  | 2.390320539  | 10.254504204 | Si  | 7.340648174  | 2.391684294  | 10.236006737 |
| Si                       | 8.846237183  | 1.842924118  | 17.472997665 | Si                       | 8.827312469  | 1.850344896  | 17.479745865 | Si  | 8.863300323  | 1.871499658  | 17.464794159 |
| Si                       | 16.684932709 | 0.145282447  | 12.391274452 | Si                       | 16.688381195 | 0.150591791  | 12.394954681 | Si  | 16.685016632 | 0.178511620  | 12.406288147 |

|    |              |              |              |    |              |              |              |    |              |              |              |
|----|--------------|--------------|--------------|----|--------------|--------------|--------------|----|--------------|--------------|--------------|
| Si | 11.090305328 | 7.581309319  | 10.207044601 | Si | 11.067398071 | 7.608956337  | 10.228223801 | Si | 11.092682838 | 7.613831043  | 10.211513519 |
| Si | 14.193628311 | 7.804907799  | 10.445056915 | Si | 14.180397034 | 7.819093704  | 10.439955711 | Si | 14.200818062 | 7.841723442  | 10.450541496 |
| Si | 16.612499237 | 0.038130879  | 15.496424675 | Si | 16.604028702 | 0.035938144  | 15.496818542 | Si | 16.616802216 | 0.076467991  | 15.506402969 |
| Si | 8.797756195  | 5.006911278  | 17.631359100 | Si | 8.774433136  | 5.012767315  | 17.655368805 | Si | 8.784024239  | 5.019185066  | 17.628450394 |
| Si | 8.846472740  | 7.303588867  | 15.498037338 | Si | 8.829564095  | 7.310780048  | 15.514770508 | Si | 8.854075432  | 7.325966835  | 15.500854492 |
| Si | 14.294882774 | -0.140645862 | 17.618694305 | Si | 14.280259132 | -0.133850455 | 17.621976852 | Si | 14.302556992 | -0.128010392 | 17.627090454 |
| Si | 11.156090736 | -0.266124010 | 17.472776413 | Si | 11.141576767 | -0.260725975 | 17.481939316 | Si | 11.161530495 | -0.247353673 | 17.475694656 |
| Si | 8.847249031  | 7.272301674  | 12.392818451 | Si | 8.837316513  | 7.287775993  | 12.407427788 | Si | 8.862709045  | 7.293050766  | 12.395380974 |
| Si | 16.657714844 | 2.417724371  | 10.195647240 | Si | 16.650514603 | 2.426042557  | 10.209268570 | Si | 16.676479340 | 2.453310728  | 10.215730667 |
| Al | 7.829936981  | 6.289256573  | 1.090146899  | Al | 7.823277473  | 6.291426659  | 1.119182348  | Al | 7.841563225  | 6.300868511  | 1.077635646  |
| Al | 17.397768021 | 6.296285629  | 1.086720943  | Al | 17.381267548 | 6.305082321  | 1.084198594  | Al | 17.409002304 | 6.321401596  | 1.104626775  |
| Al | 7.161921024  | 5.516276836  | 10.493220329 | Al | 7.135018349  | 5.519825935  | 10.503577232 | Al | 7.182792187  | 5.528826714  | 10.484352112 |
| Al | 16.687337875 | 5.564199924  | 10.393264771 | Al | 16.668054581 | 5.572212696  | 10.408635139 | Al | 16.700344086 | 5.593777657  | 10.400674820 |
| O  | 1.584988594  | 1.908146143  | 8.220268250  | O  | 1.571992636  | 1.935569882  | 8.219713211  | O  | 1.579485178  | 1.939890146  | 8.204733849  |
| O  | 0.016741350  | 0.203496233  | 2.908845901  | O  | 0.011149421  | 0.216985926  | 2.901675940  | O  | 0.031397596  | 0.226233095  | 2.884867191  |
| O  | 7.973142147  | 2.193168402  | 2.188562632  | O  | 7.976490498  | 2.200479031  | 2.198086739  | O  | 8.052950859  | 2.235426426  | 2.209271193  |
| O  | 2.853107452  | 0.336952806  | 0.022589009  | O  | 2.833121061  | 0.326555192  | 0.025436072  | O  | 2.820042372  | 0.367013603  | 0.038197197  |
| O  | 1.479582429  | 8.296731949  | 2.128030777  | O  | 1.470863104  | 8.293889046  | 2.143398523  | O  | 1.502795100  | 8.302985191  | 2.148433447  |
| O  | -0.055666447 | 3.060804605  | 0.071480133  | O  | -0.073711000 | 3.074959755  | 0.068254702  | O  | -0.046476994 | 3.113893747  | 0.084503636  |
| O  | 6.251791477  | 7.015733242  | 0.804949701  | O  | 6.249946594  | 7.033923149  | 0.867319524  | O  | 6.257925034  | 7.039168835  | 0.867565751  |
| O  | 8.076907158  | 8.812715530  | 6.273074150  | O  | 8.055813789  | 8.831744194  | 6.293375015  | O  | 8.128851891  | 8.849190712  | 6.306331635  |
| O  | 6.461098671  | 0.566003799  | 6.904736042  | O  | 6.446641922  | 0.602660358  | 6.920375824  | O  | 6.485369682  | 0.562565267  | 6.907545567  |
| O  | 8.081654549  | 5.818824291  | 9.045756340  | O  | 8.043326378  | 5.829184055  | 9.048929214  | O  | 8.100785255  | 5.838373184  | 9.035154343  |
| O  | 0.147232831  | 6.664258957  | 6.845800877  | O  | 0.121217191  | 6.690767288  | 6.865157604  | O  | 0.136262357  | 6.697854042  | 6.842180729  |
| O  | 5.026005745  | 8.504185677  | 9.019417763  | O  | 5.040391922  | 8.512898445  | 9.016763687  | O  | 4.972777843  | 8.532234192  | 9.007409096  |
| O  | 1.255182028  | 6.361747742  | 9.253674507  | O  | 1.235103846  | 6.371621609  | 9.267307281  | O  | 1.211602926  | 6.461852074  | 9.268541336  |
| O  | 18.137228012 | 2.037273407  | 6.820081711  | O  | 18.116073608 | 2.061583519  | 6.821578979  | O  | 18.116668701 | 2.125749111  | 6.828214169  |
| O  | 6.805362701  | -0.160238534 | 2.343732834  | O  | 6.753817558  | -0.115954280 | 2.361009836  | O  | 6.813199520  | -0.076997019 | 2.318825006  |
| O  | 6.143284798  | 1.692761660  | 9.307415962  | O  | 6.085291862  | 1.712665200  | 9.326822281  | O  | 6.182080269  | 1.700724363  | 9.305819511  |
| O  | 18.025253296 | 6.981586933  | 2.521087885  | O  | 18.009927750 | 6.990453243  | 2.516958952  | O  | 18.046560287 | 6.992422104  | 2.541155100  |
| O  | 1.996709347  | -0.320709258 | 6.797089100  | O  | 1.948068261  | -0.278606564 | 6.782468796  | O  | 2.035383701  | -0.306200325 | 6.825705051  |
| O  | 0.579686284  | 7.921521187  | 4.566772938  | O  | 0.541027546  | 7.930596828  | 4.575366020  | O  | 0.584527493  | 7.980513573  | 4.584071159  |
| O  | 4.035285950  | 0.908335984  | 7.969289780  | O  | 4.008504391  | 0.879186690  | 7.973598003  | O  | 4.060551643  | 0.994230926  | 7.932929993  |
| O  | 7.519073009  | 4.597037792  | 1.199406862  | O  | 7.504177094  | 4.601129055  | 1.211422920  | O  | 7.508048534  | 4.614094257  | 1.204054594  |
| O  | 7.562736034  | 1.101512194  | 4.575974464  | O  | 7.543937683  | 1.110667944  | 4.586724281  | O  | 7.580326557  | 1.102729440  | 4.579792500  |
| O  | 3.938654900  | 8.190362930  | 1.274827838  | O  | 3.925273418  | 8.190018654  | 1.275767088  | O  | 3.954417944  | 8.256187439  | 1.265226007  |
| O  | 0.389748335  | 4.234780788  | 7.895547867  | O  | 0.367832243  | 4.258265972  | 7.902880192  | O  | 0.405230582  | 4.290414810  | 7.924201012  |
| O  | 11.002557755 | 1.859573364  | 8.199286461  | O  | 10.973448753 | 1.885110617  | 8.214165688  | O  | 11.015225410 | 1.864444017  | 8.138764381  |
| O  | 9.425977707  | 0.137410268  | 2.929653168  | O  | 9.385010719  | 0.118008256  | 2.930105686  | O  | 9.431973457  | 0.131089374  | 2.933643103  |
| O  | 17.391193390 | 2.268591642  | 2.199221373  | O  | 17.386123657 | 2.279741764  | 2.200657368  | O  | 17.401605606 | 2.300627232  | 2.210458517  |
| O  | 12.336728096 | 0.361656994  | 0.112911850  | O  | 12.336608887 | 0.362636238  | 0.121483378  | O  | 12.342046738 | 0.378789574  | 0.114354379  |
| O  | 10.929196358 | 8.282660484  | 2.206340075  | O  | 10.924096107 | 8.310964584  | 2.238829374  | O  | 10.979814529 | 8.352007866  | 2.253858089  |
| O  | 9.392617226  | 2.999459028  | 0.097870089  | O  | 9.365002632  | 2.999344110  | 0.096876524  | O  | 9.403234482  | 3.048751831  | 0.090486713  |
| O  | 15.654169083 | 7.016083241  | 0.926542997  | O  | 15.640990257 | 7.024474621  | 0.920502543  | O  | 15.668473244 | 7.039599419  | 0.945290565  |

|   |              |              |              |   |              |              |              |   |              |              |              |
|---|--------------|--------------|--------------|---|--------------|--------------|--------------|---|--------------|--------------|--------------|
| O | 17.540750504 | 8.822746277  | 6.246958733  | O | 17.502201080 | 8.833812714  | 6.267687798  | O | 18.270460129 | -0.499072015 | 6.302037239  |
| O | 15.908769608 | 0.533041418  | 6.894587994  | O | 15.883523941 | 0.573819101  | 6.900616169  | O | 15.931837082 | 0.575375021  | 6.910579205  |
| O | 17.475852966 | 5.983777046  | 8.923101425  | O | 17.454204559 | 5.998094559  | 8.940778732  | O | 17.454492569 | 6.010956764  | 8.914618492  |
| O | 9.446062088  | 6.623084068  | 6.893839359  | O | 9.436479568  | 6.654760361  | 6.926163197  | O | 9.495467186  | 6.641562462  | 6.908813953  |
| O | 14.462008476 | 8.574637413  | 9.052098274  | O | 14.452936172 | 8.571296692  | 9.038385391  | O | 14.490688324 | 8.597859383  | 9.055918694  |
| O | 10.718914986 | 6.354638100  | 9.207182884  | O | 10.680018425 | 6.372286797  | 9.249930382  | O | 10.735421181 | 6.365068436  | 9.237217903  |
| O | 8.708854675  | 2.029493809  | 6.819597244  | O | 8.693498611  | 2.062341928  | 6.810892582  | O | 8.699878693  | 2.077393532  | 6.798736572  |
| O | 16.256385803 | -0.124488458 | 2.350660801  | O | 16.247455597 | -0.117943496 | 2.355992317  | O | 16.260326385 | -0.092071101 | 2.351709843  |
| O | 15.518507004 | 1.795620680  | 9.202611923  | O | 15.499629021 | 1.780593038  | 9.248229027  | O | 15.532090187 | 1.819839716  | 9.238053322  |
| O | 8.650145531  | 6.900405407  | 2.477831364  | O | 8.669782639  | 6.879047394  | 2.500651598  | O | 8.740274429  | 6.901751041  | 2.418917894  |
| O | 11.375562668 | -0.408682048 | 6.830688477  | O | 11.354442596 | -0.373816073 | 6.839191914  | O | 11.441571236 | -0.405492246 | 6.797656536  |
| O | 9.944136620  | 7.849346161  | 4.602693081  | O | 9.930122375  | 7.867468834  | 4.623876572  | O | 9.941062927  | 7.832754135  | 4.603029728  |
| O | 13.439579010 | 0.853942752  | 7.873260021  | O | 13.419000626 | 0.873965323  | 7.893109322  | O | 13.466322899 | 0.880080938  | 7.886718750  |
| O | 16.921909332 | 4.653648853  | 1.181366086  | O | 16.904546738 | 4.662680149  | 1.183238626  | O | 16.914493561 | 4.681546211  | 1.176592827  |
| O | 17.000717163 | 1.134116769  | 4.578837872  | O | 16.997200012 | 1.140391946  | 4.579038620  | O | 17.035169601 | 1.149109364  | 4.585220814  |
| O | 13.359053612 | 8.118618965  | 1.291681170  | O | 13.348950386 | 8.117818832  | 1.306654811  | O | 13.368265152 | 8.129174232  | 1.274091721  |
| O | 9.874716759  | 4.208234787  | 7.870526791  | O | 9.859876633  | 4.233150005  | 7.891776085  | O | 9.903830528  | 4.224055290  | 7.883172512  |
| O | 0.890153170  | 1.159850359  | 17.573545456 | O | 0.881637812  | 1.163151503  | 17.590301514 | O | 0.903406501  | 1.191270351  | 17.592300415 |
| O | -0.674054325 | -0.512843728 | 12.351702690 | O | -0.670257807 | -0.511946201 | 12.371365547 | O | -0.685217857 | -0.505153775 | 12.388807297 |
| O | 7.442472935  | 1.504487514  | 11.626640320 | O | 7.432723522  | 1.508674145  | 11.623813629 | O | 7.487038612  | 1.517707467  | 11.618956566 |
| O | 2.196900129  | -0.339806139 | 9.450715065  | O | 2.130575180  | -0.332498580 | 9.439621925  | O | 2.273573637  | -0.267468572 | 9.472562790  |
| O | 0.823642313  | 7.695204258  | 11.572829247 | O | 0.827828169  | 7.699345112  | 11.584474564 | O | 0.857525110  | 7.785679817  | 11.602837563 |
| O | -0.711764812 | 2.338735104  | 9.467652321  | O | -0.727615237 | 2.363605976  | 9.466268539  | O | -0.700387657 | 2.391525745  | 9.479927063  |
| O | 5.638356209  | 6.367996693  | 10.502756119 | O | 5.615217209  | 6.372555733  | 10.515503883 | O | 5.685415268  | 6.416676521  | 10.475154877 |
| O | 7.363934517  | 8.023236275  | 15.605793953 | O | 7.352235794  | 8.035305977  | 15.624673843 | O | 7.370841980  | 8.041551590  | 15.616813660 |
| O | 5.750315666  | -0.250256419 | 16.237318039 | O | 5.736587048  | -0.230380654 | 16.249479294 | O | 5.758048534  | -0.186868668 | 16.236848831 |
| O | 7.362756252  | 5.164561749  | 18.341207504 | O | 7.338385105  | 5.160678387  | 18.363162994 | O | 7.318704605  | 5.126705647  | 18.285675049 |
| O | -0.568261921 | 5.911944389  | 16.219657898 | O | -0.567850411 | 5.912541866  | 16.224426270 | O | -0.565966785 | 5.943164349  | 16.224267960 |
| O | 4.344229698  | 7.811149597  | 18.390954971 | O | 4.343614578  | 7.812687874  | 18.406696320 | O | 4.393133163  | 7.797242165  | 18.361288071 |
| O | 0.681978583  | 5.572711468  | 18.530261993 | O | 0.665409923  | 5.562433720  | 18.549600601 | O | 0.702525973  | 5.606922150  | 18.536026001 |
| O | 17.452671051 | 1.274211764  | 16.160264969 | O | 17.460477829 | 1.267079949  | 16.155590057 | O | -1.372021556 | 1.301425934  | 16.177536011 |
| O | 5.913550854  | -0.647513509 | 11.707224846 | O | 5.911436558  | -0.644684553 | 11.711305618 | O | 5.929459095  | -0.611665189 | 11.692162514 |
| O | 5.402023792  | 1.059340477  | 18.539989471 | O | 5.362054348  | 1.065081120  | 18.570350647 | O | 5.403797150  | 1.054575205  | 18.582128525 |
| O | 17.377592087 | 6.271904945  | 11.794013977 | O | 17.383499146 | 6.268627167  | 11.806444168 | O | -1.388202667 | 6.285935402  | 11.783271790 |
| O | 1.255706787  | -1.042758584 | 16.104972839 | O | 1.230393291  | -1.027216911 | 16.110498428 | O | 1.254559875  | -1.008128881 | 16.116764069 |
| O | -0.141660213 | 7.128461361  | 13.930698395 | O | -0.135079026 | 7.120415211  | 13.937832832 | O | -0.121181786 | 7.130161285  | 13.944212914 |
| O | 3.311823130  | 0.114521503  | 17.247430801 | O | 3.298336983  | 0.095292091  | 17.262620926 | O | 3.326434135  | 0.086709380  | 17.278453827 |
| O | 6.740765572  | 3.819058895  | 10.658750534 | O | 6.703289032  | 3.831043243  | 10.674801826 | O | 6.800849915  | 3.833480597  | 10.647684097 |
| O | 6.855454922  | 0.361998796  | 13.942921638 | O | 6.845111370  | 0.367268562  | 13.950415611 | O | 6.862804413  | 0.379701376  | 13.941116333 |
| O | 3.231367111  | 7.445926666  | 10.668347359 | O | 3.221459389  | 7.482979774  | 10.633628845 | O | 3.247640610  | 7.431526184  | 10.689977646 |
| O | -0.304918408 | 3.471313953  | 17.239244461 | O | -0.306665182 | 3.471666336  | 17.226564407 | O | -0.283467174 | 3.507946491  | 17.236354828 |
| O | 10.304464340 | 1.114775181  | 17.566999435 | O | 10.282432556 | 1.114842296  | 17.581487656 | O | 10.316449165 | 1.135596752  | 17.570110321 |
| O | 8.576788902  | -0.795380414 | 12.250228882 | O | 8.576106071  | -0.774692059 | 12.274393082 | O | 8.592193604  | -0.776563823 | 12.270062447 |
| O | 16.708623886 | 1.535738707  | 11.570349693 | O | 16.758586884 | 1.552295923  | 11.591032982 | O | 16.758726120 | 1.569855213  | 11.591618538 |

|    |              |              |              |    |              |              |              |    |              |              |              |
|----|--------------|--------------|--------------|----|--------------|--------------|--------------|----|--------------|--------------|--------------|
| O  | 11.673960686 | -0.362888128 | 9.472405434  | O  | 11.646994591 | -0.341944903 | 9.481864929  | O  | 11.675280571 | -0.343115389 | 9.451038361  |
| O  | 10.209753990 | 7.607029438  | 11.555171013 | O  | 10.208663940 | 7.643206120  | 11.589079857 | O  | 10.227016449 | 7.660237312  | 11.567890167 |
| O  | 8.733668327  | 2.377704620  | 9.468806267  | O  | 8.678359985  | 2.388531685  | 9.453995705  | O  | 8.767388344  | 2.357287645  | 9.445690155  |
| O  | 14.941653252 | 6.272560120  | 10.289481163 | O  | 14.922572136 | 6.280508518  | 10.308517456 | O  | 14.954911232 | 6.307158470  | 10.324007034 |
| O  | 16.803010941 | 8.059982300  | 15.594821930 | O  | 16.786895752 | 8.050653458  | 15.574136734 | O  | 16.800186157 | 8.087765694  | 15.573779106 |
| O  | 15.198101044 | -0.197664618 | 16.271121979 | O  | 15.192475319 | -0.190060377 | 16.276489258 | O  | 15.206692696 | -0.175911665 | 16.276172638 |
| O  | 16.860563278 | 5.245037556  | 18.376949310 | O  | 16.848424911 | 5.239274025  | 18.370880127 | O  | 16.883632660 | 5.273541451  | 18.399778366 |
| O  | 8.763171196  | 5.847369194  | 16.220376968 | O  | 8.748827934  | 5.861833096  | 16.250291824 | O  | 8.793445587  | 5.876050949  | 16.231903076 |
| O  | 13.778882027 | 7.828263283  | 18.420602798 | O  | 13.766358376 | 7.836803913  | 18.426952362 | O  | 13.799748421 | 7.838992596  | 18.419914246 |
| O  | 10.021733284 | 5.603705406  | 18.562110901 | O  | 9.988024712  | 5.603400230  | 18.604948044 | O  | 9.965926170  | 5.617687225  | 18.615055084 |
| O  | 7.996414185  | 1.257665634  | 16.187538147 | O  | 7.984202385  | 1.268420815  | 16.190902710 | O  | 8.025091171  | 1.273074985  | 16.182096481 |
| O  | 15.584445953 | -0.872382820 | 11.705950737 | O  | 15.592615128 | -0.851189017 | 11.687744141 | O  | 15.578261375 | -0.824337721 | 11.717515945 |
| O  | 14.786418915 | 1.057038903  | 18.586961746 | O  | 14.774521828 | 1.064385295  | 18.587858200 | O  | 14.802419662 | 1.064357281  | 18.596265793 |
| O  | 8.100934029  | 5.959821224  | 11.896925926 | O  | 8.102863312  | 5.979597569  | 11.884415627 | O  | 8.140103340  | 5.979259968  | 11.876824379 |
| O  | 10.649582863 | -1.147141576 | 16.209564209 | O  | 10.640164375 | -1.138921142 | 16.216651917 | O  | 10.661553383 | -1.123428583 | 16.210369110 |
| O  | 9.286077499  | 7.124502182  | 13.960045815 | O  | 9.264471054  | 7.120999336  | 13.977443695 | O  | 9.296190262  | 7.139040947  | 13.965554237 |
| O  | 12.730884552 | 0.087099671  | 17.245872498 | O  | 12.717489243 | 0.097757339  | 17.249797821 | O  | 12.741612434 | 0.100404263  | 17.257194519 |
| O  | 16.236913681 | 3.917137384  | 10.550211906 | O  | 16.221860886 | 3.922765732  | 10.572083473 | O  | 16.258981705 | 3.947363377  | 10.608110428 |
| O  | 16.258182526 | 0.395252585  | 13.944466591 | O  | 16.251785278 | 0.402561426  | 13.945055008 | O  | 16.274061203 | 0.461151600  | 13.958399773 |
| O  | 12.659728050 | 7.388861656  | 10.687764168 | O  | 12.645440102 | 7.423636913  | 10.695051193 | O  | 12.668622017 | 7.436058521  | 10.686315536 |
| O  | 9.111618996  | 3.436582804  | 17.276987076 | O  | 9.095031738  | 3.445230484  | 17.290679932 | O  | 9.139170647  | 3.460729599  | 17.257503510 |
| O  | 3.833584547  | 2.431006432  | 15.138986588 | O  | 3.579480410  | 2.434783697  | 15.258826256 | O  | 3.204043865  | 2.455207825  | 15.418251991 |
| O  | 4.390694618  | 4.414302349  | 13.833879471 | O  | 4.263050079  | 4.364681244  | 13.977328300 | O  | 4.399037361  | 4.025663853  | 14.192150116 |
| O  | 2.655824184  | 5.187738895  | 12.746892929 | O  | 2.875170708  | 5.497997761  | 12.720558167 | O  | 1.732027769  | 3.981855869  | 11.228821754 |
| Cu | 3.974968910  | 2.607778549  | 13.369871140 | Cu | 3.658360481  | 2.593149662  | 13.462551117 | Cu | 3.932438135  | 2.293139458  | 13.727479935 |
| Cu | 4.371337891  | 4.005622387  | 15.927210808 | Cu | 4.242485523  | 3.985267878  | 16.004680634 | Cu | 4.120201111  | 3.895426750  | 15.956869125 |
| H  | 15.015351295 | 6.282586575  | 0.834025919  | H  | 14.999830246 | 6.291073799  | 0.844316900  | H  | 15.032159805 | 6.302960396  | 0.858730197  |
| H  | 3.676796913  | 0.426987648  | 14.249174118 | H  | 3.747576952  | 0.388371110  | 14.394321442 | H  | 3.483764887  | 0.017008662  | 14.605522156 |
| H  | 2.747195005  | 0.437075019  | 12.860722542 | H  | 2.756231308  | 0.243990302  | 13.058957100 | H  | 2.723558903  | 0.031768560  | 13.135511398 |
| H  | 4.393152237  | 0.175751328  | 12.744760513 | H  | 4.408132076  | 0.175374627  | 12.866440773 | H  | 4.356326103  | -0.168783545 | 13.198037148 |
| H  | 4.090792179  | 2.128389120  | 10.852581024 | H  | 3.955590010  | 2.091117859  | 10.960097313 | H  | 4.831856251  | 1.612368345  | 11.436203003 |
| H  | 3.410573721  | 3.601948261  | 11.146644592 | H  | 3.322111130  | 3.594510555  | 11.202383995 | H  | 3.677289724  | 2.760266304  | 11.260484695 |
| H  | 5.066645622  | 3.409034014  | 11.238844872 | H  | 4.949577808  | 3.344071150  | 11.379609108 | H  | 5.203957081  | 3.192833424  | 11.709412575 |
| H  | 14.295889854 | 5.543984890  | 10.206672668 | H  | 14.273372650 | 5.553753853  | 10.235590935 | H  | 14.305377007 | 5.579109192  | 10.261755943 |
| H  | 3.900544405  | 4.232096195  | 18.433048248 | H  | 3.852585077  | 4.230273247  | 18.527223587 | H  | 3.901286125  | 4.303956509  | 18.496042252 |
| H  | 2.709102631  | 3.292888641  | 17.696979523 | H  | 2.640096664  | 3.292879820  | 17.828243256 | H  | 2.658793211  | 3.347896576  | 17.866432190 |
| H  | 4.196083546  | 2.649182796  | 18.042297363 | H  | 4.134171963  | 2.646677732  | 18.134351730 | H  | 4.163675308  | 2.711285591  | 18.121433258 |
| H  | 5.690219879  | 6.147171497  | 15.589425087 | H  | 5.635514259  | 6.067522049  | 15.614225388 | H  | 5.594046116  | 5.722259998  | 15.377493858 |
| H  | 4.723668575  | 6.355746269  | 16.902591705 | H  | 4.710593224  | 6.334905624  | 16.945196152 | H  | 4.722327232  | 6.250638008  | 16.697069168 |
| H  | 6.089727402  | 5.480978489  | 17.051719666 | H  | 6.052170753  | 5.423370361  | 17.082944870 | H  | 6.018779755  | 5.273122787  | 16.939783096 |
| N  | 3.657546520  | 0.691838622  | 13.257436752 | H  | 1.013434768  | 3.812061787  | 13.078677177 | H  | 0.749398112  | 5.079603195  | 14.192132950 |
| N  | 4.143379688  | 2.955512285  | 11.452692986 | H  | 0.674073040  | 2.238707542  | 12.772926331 | H  | 0.331780791  | 3.527529001  | 13.712169647 |
| N  | 3.710928917  | 3.499692440  | 17.726648331 | H  | 1.046580434  | 2.722868443  | 14.300580025 | H  | 1.858978391  | 3.790423393  | 14.403359413 |
| N  | 5.296934605  | 5.666071892  | 16.402307510 | N  | 3.645653725  | 0.618842363  | 13.400144577 | N  | 3.568409443  | 0.327274799  | 13.633620262 |

|                                |              |              |              |                                |              |              |              |                                |              |              |              |
|--------------------------------|--------------|--------------|--------------|--------------------------------|--------------|--------------|--------------|--------------------------------|--------------|--------------|--------------|
| N                              | 3.588671684  | 5.447719574  | 13.458477974 | N                              | 4.011248589  | 2.923527479  | 11.551472664 | N                              | 4.467829227  | 2.477720022  | 11.845652580 |
|                                |              |              |              | N                              | 3.642365932  | 3.496953011  | 17.829563141 | N                              | 3.659640312  | 3.556568384  | 17.820592880 |
|                                |              |              |              | N                              | 5.250997543  | 5.617288589  | 16.448232651 | N                              | 5.223302841  | 5.451862335  | 16.292469025 |
|                                |              |              |              | N                              | 3.705100536  | 5.546702385  | 13.589482307 | N                              | 1.886989594  | 4.784618378  | 12.061031342 |
|                                |              |              |              | N                              | 1.286419868  | 2.855016470  | 13.314598083 | N                              | 1.099042773  | 4.190732956  | 13.828644753 |
| <b>Structure I<sub>2</sub></b> |              |              |              | <b>Structure J<sub>2</sub></b> |              |              |              | <b>Structure K<sub>2</sub></b> |              |              |              |
| Si                             | 0.114353955  | 2.576234579  | 8.107199669  | Si                             | 0.138006389  | 2.575533390  | 8.109479904  | Si                             | 0.161789894  | 2.483213902  | 8.244474411  |
| Si                             | 7.933447838  | 0.774565578  | 3.050510406  | Si                             | 7.955383778  | 0.755113661  | 3.040444851  | Si                             | 7.964020729  | 0.709188223  | 3.119638920  |
| Si                             | 2.398762226  | 8.279253006  | 0.835182428  | Si                             | 2.407428265  | 8.250000954  | 0.854557157  | Si                             | 2.430744171  | 8.225805283  | 0.937309444  |
| Si                             | 5.534419060  | 8.399662971  | 1.073971868  | Si                             | 5.537412643  | 8.375576973  | 1.081123710  | Si                             | 5.540681839  | 8.331542969  | 1.143465877  |
| Si                             | 7.871357918  | 0.741406083  | 6.159420967  | Si                             | 7.902341366  | 0.729922891  | 6.168125153  | Si                             | 7.910173416  | 0.650286376  | 6.244731903  |
| Si                             | 0.076393604  | 5.755684853  | 8.255202293  | Si                             | 0.034062207  | 5.724943161  | 8.262047768  | Si                             | 0.108595431  | 5.660794735  | 8.366298676  |
| Si                             | 0.134841710  | 8.044327736  | 6.147884846  | Si                             | 0.149053216  | 8.034913063  | 6.172341347  | Si                             | 0.191598773  | 7.956430435  | 6.258005619  |
| Si                             | 5.579485893  | 0.485553205  | 8.316109657  | Si                             | 5.601061344  | 0.481622159  | 8.307661057  | Si                             | 5.618750095  | 0.420867801  | 8.402459145  |
| Si                             | 2.449145555  | 0.464724958  | 8.131926537  | Si                             | 2.468043804  | 0.452297688  | 8.140509605  | Si                             | 2.491956472  | 0.389931440  | 8.258201599  |
| Si                             | 0.123984680  | 8.112533569  | 3.052030802  | Si                             | 0.129032180  | 8.094319344  | 3.071542025  | Si                             | 0.167732790  | 8.033579826  | 3.165659428  |
| Si                             | 7.952534199  | 3.076209068  | 0.877379358  | Si                             | 7.941955566  | 3.059737682  | 0.873763144  | Si                             | 7.950688362  | 3.015347004  | 0.965817750  |
| Si                             | 9.532183647  | 2.590085030  | 8.092337608  | Si                             | 9.561138153  | 2.579181671  | 8.086791992  | Si                             | 9.581661224  | 2.483796835  | 8.164203644  |
| Si                             | 17.379241943 | 0.807827473  | 3.028508663  | Si                             | 17.387834549 | 0.774516404  | 3.045849323  | Si                             | 17.414482117 | 0.737912476  | 3.152249336  |
| Si                             | 11.770188332 | 8.281758308  | 0.866858721  | Si                             | 11.788785934 | 8.267256737  | 0.862755537  | Si                             | 11.810280800 | 8.199529648  | 0.971316040  |
| Si                             | 14.885997772 | 8.483849525  | 1.078653336  | Si                             | 14.906289101 | 8.460580826  | 1.101985455  | Si                             | 14.918556213 | 8.403651237  | 1.204310060  |
| Si                             | 17.316766739 | 0.746697307  | 6.146199703  | Si                             | 17.326675415 | 0.726274967  | 6.173738003  | Si                             | 17.371986389 | 0.633134961  | 6.268459320  |
| Si                             | 9.439719200  | 5.718677044  | 8.288399696  | Si                             | 9.502962112  | 5.712804317  | 8.304958344  | Si                             | 9.535199165  | 5.633670330  | 8.373044014  |
| Si                             | 9.521191597  | 8.017477036  | 6.148968220  | Si                             | 9.577177048  | 8.016801834  | 6.164053917  | Si                             | 9.560892105  | 7.928607464  | 6.237905979  |
| Si                             | 14.973387718 | 0.565813124  | 8.249279022  | Si                             | 15.011102676 | 0.526333749  | 8.288496971  | Si                             | 15.026371956 | 0.441021264  | 8.359509468  |
| Si                             | 11.840020180 | 0.458482027  | 8.083025932  | Si                             | 11.878085136 | 0.443817616  | 8.086259842  | Si                             | 11.887553215 | 0.346095145  | 8.169554710  |
| Si                             | 9.539746284  | 8.068822861  | 3.062639475  | Si                             | 9.547158241  | 8.051956177  | 3.058906794  | Si                             | 9.544859886  | 8.010298729  | 3.140154839  |
| Si                             | 17.323398590 | 3.100268841  | 0.849060535  | Si                             | 17.328731537 | 3.079186678  | 0.872100353  | Si                             | 17.344097137 | 3.000986576  | 0.970237195  |
| Si                             | -0.576502442 | 1.842734933  | 17.452186584 | Si                             | -0.574194074 | 1.810484886  | 17.493921280 | Si                             | -0.590971768 | 1.761179090  | 17.584011078 |
| Si                             | 7.215449333  | 0.040135980  | 12.384590149 | Si                             | 7.211209297  | 0.025487125  | 12.385264397 | Si                             | 7.257372379  | -0.035971940 | 12.480513573 |
| Si                             | 1.706730008  | 7.530303955  | 10.204945564 | Si                             | 1.699531317  | 7.528904915  | 10.244129181 | Si                             | 1.744072795  | 7.445607662  | 10.341554642 |
| Si                             | 4.802049160  | 7.673729420  | 10.502605438 | Si                             | 4.817595959  | 7.649731636  | 10.484228134 | Si                             | 4.857499123  | 7.564995766  | 10.560863495 |
| Si                             | 7.197623730  | -0.016645312 | 15.522971153 | Si                             | 7.190361500  | -0.025817871 | 15.519854546 | Si                             | 7.217034817  | -0.081989527 | 15.607365608 |
| Si                             | -0.574112058 | 5.009280205  | 17.632160187 | Si                             | -0.574186742 | 4.970986843  | 17.671264648 | Si                             | -0.584792554 | 4.960112095  | 17.764993668 |
| Si                             | -0.544428647 | 7.316533566  | 15.500369072 | Si                             | -0.563137770 | 7.268290520  | 15.527132988 | Si                             | -0.530302763 | 7.224626541  | 15.620460510 |
| Si                             | 4.886500359  | -0.184878945 | 17.642700195 | Si                             | 4.877366543  | -0.210433125 | 17.642091751 | Si                             | 4.876574516  | -0.233738422 | 17.722919464 |
| Si                             | 1.739955068  | -0.276699424 | 17.467115402 | Si                             | 1.736441016  | -0.310079455 | 17.475036621 | Si                             | 1.757414579  | -0.328698039 | 17.559476852 |
| Si                             | -0.582998812 | 7.338862419  | 12.405643463 | Si                             | -0.547473013 | 7.319505692  | 12.425389290 | Si                             | -0.538961172 | 7.282245159  | 12.520730019 |
| Si                             | 7.271718979  | 2.326436996  | 10.267612457 | Si                             | 7.310795307  | 2.306335211  | 10.255462646 | Si                             | 7.335505486  | 2.230987072  | 10.335669518 |
| Si                             | 8.853284836  | 1.810830355  | 17.482397079 | Si                             | 8.849707603  | 1.800140262  | 17.477840424 | Si                             | 8.875698090  | 1.734507442  | 17.585002899 |
| Si                             | 16.667966843 | 0.054076195  | 12.387693405 | Si                             | 16.703456879 | 0.056254864  | 12.427917480 | Si                             | 16.712282181 | -0.016658485 | 12.512484550 |
| Si                             | 11.066193581 | 7.545109749  | 10.207041740 | Si                             | 11.096884727 | 7.551953316  | 10.225615501 | Si                             | 11.109118462 | 7.448568344  | 10.300696373 |
| Si                             | 14.168087006 | 7.743916988  | 10.436861038 | Si                             | 14.207682610 | 7.728609085  | 10.476080894 | Si                             | 14.210672379 | 7.653832436  | 10.558144569 |
| Si                             | 16.624567032 | 0.006627917  | 15.504987717 | Si                             | 16.627088547 | -0.023008585 | 15.539101601 | Si                             | 16.646326065 | -0.073731780 | 15.632391930 |

|    |              |              |              |    |              |              |              |    |              |              |              |
|----|--------------|--------------|--------------|----|--------------|--------------|--------------|----|--------------|--------------|--------------|
| Si | 8.779386520  | 4.970070839  | 17.631195068 | Si | 8.793025017  | 4.960558891  | 17.632308960 | Si | 8.823517799  | 4.900131702  | 17.742460251 |
| Si | 8.849736214  | 7.274026394  | 15.510065079 | Si | 8.849477768  | 7.267470837  | 15.510642052 | Si | 8.866339684  | 7.207209110  | 15.609059334 |
| Si | 14.297386169 | -0.182738900 | 17.632179260 | Si | 14.300169945 | -0.187326431 | 17.647003174 | Si | 14.316840172 | -0.285382509 | 17.747846603 |
| Si | 11.161156654 | -0.295395017 | 17.477844238 | Si | 11.164351463 | -0.305710673 | 17.482299805 | Si | 11.182273865 | -0.367605090 | 17.587673187 |
| Si | 8.844010353  | 7.232450962  | 12.398024559 | Si | 8.853157043  | 7.232627392  | 12.400427818 | Si | 8.851976395  | 7.155153275  | 12.510357857 |
| Si | 16.641372681 | 2.342571259  | 10.209116936 | Si | 16.700876236 | 2.322953224  | 10.252583504 | Si | 16.678812027 | 2.251924992  | 10.336015701 |
| Al | 7.834729195  | 6.256321430  | 1.082709551  | Al | 7.838945866  | 6.236322403  | 1.092390060  | Al | 7.841637611  | 6.198902607  | 1.164149761  |
| Al | 17.393115997 | 6.242081165  | 1.106289148  | Al | 17.389739990 | 6.214727402  | 1.160589337  | Al | 17.430133820 | 6.171752453  | 1.235007524  |
| Al | 7.162414551  | 5.470023632  | 10.517419815 | Al | 7.201918125  | 5.469099998  | 10.500729561 | Al | 7.227138042  | 5.410394669  | 10.577301979 |
| Al | 16.677703857 | 5.491075993  | 10.446356773 | Al | 16.627700806 | 5.485655785  | 10.432098389 | Al | 16.710475922 | 5.404091835  | 10.543385506 |
| O  | 1.564890265  | 1.833749294  | 8.239006996  | O  | 1.582698464  | 1.820200682  | 8.249347687  | O  | 1.629283071  | 1.769585371  | 8.409207344  |
| O  | 0.011342019  | 0.143853247  | 2.935503006  | O  | 0.026614517  | 0.130513445  | 2.937975168  | O  | 0.033738866  | 0.052546889  | 3.053220510  |
| O  | 7.999539375  | 2.156492949  | 2.208983898  | O  | 7.996672630  | 2.144648075  | 2.208061218  | O  | 7.993312836  | 2.118900776  | 2.319762468  |
| O  | 2.837096453  | 0.306130230  | 0.055918451  | O  | 2.868127584  | 0.280305535  | 0.075678274  | O  | 2.933940411  | 0.269319504  | 0.174045503  |
| O  | 1.471889734  | 8.245355606  | 2.152533293  | O  | 1.478869200  | 8.205710411  | 2.171423912  | O  | 1.498959064  | 8.204664230  | 2.251540661  |
| O  | -0.073683098 | 3.028588772  | 0.058490131  | O  | -0.053854156 | 2.995124578  | 0.113954723  | O  | -0.058391072 | 2.860374451  | 0.191061929  |
| O  | 6.256660461  | 6.992055893  | 0.839602947  | O  | 6.264376640  | 6.973214149  | 0.826457441  | O  | 6.279931545  | 6.942551136  | 0.851189256  |
| O  | 8.080723763  | 8.782917023  | 6.254266739  | O  | 8.143289566  | 8.794975281  | 6.311964035  | O  | 8.121107101  | 8.693073273  | 6.380405426  |
| O  | 6.471730232  | 0.483997524  | 6.960076809  | O  | 6.483010769  | 0.472451746  | 6.946428299  | O  | 6.499896049  | 0.418150127  | 7.040824413  |
| O  | 8.041954994  | 5.815178394  | 9.050152779  | O  | 8.089262962  | 5.809168816  | 9.043842316  | O  | 8.158815384  | 5.783435822  | 9.165056229  |
| O  | 0.048830807  | 6.578674316  | 6.844849110  | O  | 0.083879292  | 6.571004391  | 6.869393349  | O  | 0.153706372  | 6.492145538  | 6.962519646  |
| O  | 4.955005646  | 8.428961754  | 9.054755211  | O  | 4.989373207  | 8.428970337  | 9.054451942  | O  | 5.003120422  | 8.365369797  | 9.139396667  |
| O  | 1.316888094  | 6.340605736  | 9.167243004  | O  | 1.195436001  | 6.325350761  | 9.273630142  | O  | 1.318424225  | 6.239612103  | 9.335687637  |
| O  | 18.127399445 | 1.998639107  | 6.814951897  | O  | 18.132551193 | 1.987141728  | 6.839266777  | O  | -0.633251786 | 1.865965605  | 6.951976299  |
| O  | 6.797965527  | -0.171043456 | 2.350475073  | O  | 6.127151966  | 9.201839447  | 2.350185156  | O  | 6.159328938  | 9.146049500  | 2.407114506  |
| O  | 6.107376099  | 1.610238314  | 9.359012604  | O  | 6.136229992  | 1.614247680  | 9.341943741  | O  | 6.148854733  | 1.555659294  | 9.434440613  |
| O  | 18.021415710 | 6.922982693  | 2.539991140  | O  | 18.014736176 | 6.900433540  | 2.594951868  | O  | 18.078990936 | 6.820110798  | 2.680985928  |
| O  | 1.960312366  | -0.429068655 | 6.869114876  | O  | 1.987447023  | -0.441766560 | 6.879682064  | O  | 1.982766390  | -0.486650854 | 6.998325825  |
| O  | 0.567469954  | 7.872102261  | 4.597589493  | O  | 0.570443511  | 7.872210979  | 4.621070862  | O  | 0.637874901  | 7.801891804  | 4.711273193  |
| O  | 4.020900726  | 0.847359955  | 7.959173679  | O  | 4.038223267  | 0.846425831  | 7.969201088  | O  | 4.057991982  | 0.782710373  | 8.066923141  |
| O  | 7.549391747  | 4.563232422  | 1.227618456  | O  | 7.536746025  | 4.544621468  | 1.230440736  | O  | 7.552794933  | 4.507760525  | 1.297310472  |
| O  | 7.513873100  | 1.073431492  | 4.601600647  | O  | 7.563693523  | 1.035565138  | 4.600596905  | O  | 7.558299065  | 0.954431772  | 4.683320045  |
| O  | 3.939483166  | 8.161859512  | 1.292622924  | O  | 3.947920561  | 8.133519173  | 1.322814703  | O  | 3.962470055  | 8.066269875  | 1.427609324  |
| O  | 0.355328321  | 4.173535347  | 7.931277752  | O  | 0.412520409  | 4.164333344  | 7.920307159  | O  | 0.422123969  | 4.079000950  | 8.057745934  |
| O  | 10.980876923 | 1.831402063  | 8.204867363  | O  | 10.994780540 | 1.802253246  | 8.166221619  | O  | 11.022324562 | 1.717640996  | 8.256756783  |
| O  | 9.404308319  | 0.088119730  | 3.004868269  | O  | 9.429604530  | 0.081151605  | 2.969744921  | O  | 9.446107864  | 0.049503699  | 3.055781603  |
| O  | 17.400936127 | 2.193585873  | 2.196393251  | O  | 17.367156982 | 2.156060219  | 2.210949659  | O  | 17.418077469 | 2.143388271  | 2.354697704  |
| O  | 12.351942062 | 0.333365053  | 0.118902199  | O  | 12.353390694 | 0.322656810  | 0.120186962  | O  | 12.378629684 | 0.249016285  | 0.222029403  |
| O  | 10.943321228 | 8.310817719  | 2.241565466  | O  | 10.944792747 | 8.268987656  | 2.225487232  | O  | 10.953330040 | 8.215059280  | 2.326931477  |
| O  | 9.399510384  | 2.951809645  | 0.102987394  | O  | 9.387203217  | 2.945218325  | 0.092402734  | O  | 9.399056435  | 2.877337694  | 0.191463530  |
| O  | 15.651023865 | 6.962313175  | 0.918101907  | O  | 15.677977562 | 6.959483624  | 0.901617706  | O  | 15.680874825 | 6.877617359  | 1.078056335  |
| O  | 17.517827988 | 8.782996178  | 6.256320000  | O  | 17.535650253 | 8.770225525  | 6.323146343  | O  | 17.556251526 | 8.654973984  | 6.363333702  |
| O  | 15.899008751 | 0.504946649  | 6.918861866  | O  | 15.903953552 | 0.491975188  | 6.934098244  | O  | 15.945825577 | 0.393686831  | 7.023399830  |
| O  | 17.520883560 | 5.969321251  | 9.032734871  | O  | 17.427852631 | 5.838721752  | 8.948580742  | O  | 17.527038574 | 5.841671944  | 9.089746475  |



|   |              |              |              |   |              |              |              |   |              |              |              |
|---|--------------|--------------|--------------|---|--------------|--------------|--------------|---|--------------|--------------|--------------|
| O | 9.440158844  | 6.590288639  | 6.905602932  | O | 9.513617516  | 6.590066910  | 6.925489426  | O | 9.503291130  | 6.493454933  | 6.985199451  |
| O | 14.444447517 | 8.526357651  | 9.053317070  | O | 14.470685959 | 8.479211807  | 9.065093994  | O | 14.473893166 | 8.392266273  | 9.144571304  |
| O | 10.679304123 | 6.315172672  | 9.223601341  | O | 10.728175163 | 6.297872543  | 9.260722160  | O | 10.793871880 | 6.216021538  | 9.287359238  |
| O | 8.681840897  | 1.996391773  | 6.824771404  | O | 8.673840523  | 2.011568785  | 6.830819607  | O | 8.718624115  | 1.921393156  | 6.890119553  |
| O | 15.557168961 | 9.205653191  | 2.349242687  | O | 15.580478668 | 9.141440392  | 2.391578674  | O | 15.592262268 | 9.145009995  | 2.463210583  |
| O | 15.468943596 | 1.750689507  | 9.240014076  | O | 15.553192139 | 1.685649872  | 9.286992073  | O | 15.540022850 | 1.608362436  | 9.356550217  |
| O | 8.704155922  | 6.865715504  | 2.440664291  | O | 8.687872887  | 6.852577209  | 2.460086346  | O | 8.665119171  | 6.828360081  | 2.539236069  |
| O | 11.364241600 | -0.429221004 | 6.816409588  | O | 11.450431824 | -0.445641428 | 6.800982952  | O | 11.424140930 | -0.537691593 | 6.894548893  |
| O | 9.950492859  | 7.764840126  | 4.609288216  | O | 9.952217102  | 7.767124653  | 4.609641075  | O | 9.950596809  | 7.704065323  | 4.686738968  |
| O | 13.420993805 | 0.825684309  | 7.869699955  | O | 13.460072517 | 0.825844109  | 7.933402061  | O | 13.472521782 | 0.705312073  | 7.982456684  |
| O | 16.922840118 | 4.598614216  | 1.219529033  | O | 16.929306030 | 4.569729328  | 1.261607766  | O | 16.966165543 | 4.520544052  | 1.284527421  |
| O | 16.970525742 | 1.076986313  | 4.582581997  | O | 17.001302719 | 1.040033460  | 4.604698658  | O | 17.027538300 | 0.986659229  | 4.714125633  |
| O | 13.351781845 | 8.049498558  | 1.275707364  | O | 13.362853050 | 8.047365189  | 1.278576136  | O | 13.379599571 | 7.985813141  | 1.419447422  |
| O | 9.827726364  | 4.172660351  | 7.887124538  | O | 9.870815277  | 4.160485744  | 7.909765244  | O | 9.868938446  | 4.071588516  | 7.997759819  |
| O | 0.881353140  | 1.109461427  | 17.575080872 | O | 0.887020588  | 1.077433944  | 17.604164124 | O | 0.878171325  | 1.041897416  | 17.669778824 |
| O | -0.705461502 | -0.638155580 | 12.324455261 | O | -0.686703086 | -0.663082004 | 12.369122505 | O | -0.655160248 | -0.687792063 | 12.424305916 |
| O | 7.451413631  | 1.457561731  | 11.646808624 | O | 7.443519115  | 1.443727016  | 11.643425941 | O | 7.456626415  | 1.385620832  | 11.731641769 |
| O | 2.240357399  | -0.382870853 | 9.519211769  | O | 2.266846895  | -0.396180451 | 9.530144691  | O | 2.302937746  | -0.467299283 | 9.645905495  |
| O | 0.763264894  | 7.528346539  | 11.529687881 | O | 0.859079421  | 7.593658447  | 11.636513710 | O | 0.852908432  | 7.484818459  | 11.694026947 |
| O | -0.746455193 | 2.256057739  | 9.463706970  | O | -0.692791164 | 2.307550430  | 9.496185303  | O | -0.691719174 | 2.167710781  | 9.604595184  |
| O | 5.653945446  | 6.345893383  | 10.591638565 | O | 5.676033020  | 6.321893692  | 10.567149162 | O | 5.676565170  | 6.209513664  | 10.572948456 |
| O | 7.366735935  | 7.986672401  | 15.642412186 | O | 7.363281727  | 7.977553368  | 15.624768257 | O | 7.369504929  | 7.906079769  | 15.690503120 |
| O | 5.758514404  | -0.276153922 | 16.262859344 | O | 5.758012772  | -0.301578104 | 16.264741898 | O | 5.780893326  | -0.314793408 | 16.359590530 |
| O | 7.326840401  | 5.104948521  | 18.305376053 | O | 7.348737240  | 5.088126659  | 18.323144913 | O | 7.376134872  | 5.055044651  | 18.418788910 |
| O | -0.585838735 | 5.868263721  | 16.233810425 | O | -0.598557532 | 5.834047794  | 16.280389786 | O | -0.580341637 | 5.776142597  | 16.347923279 |
| O | 4.336215019  | 7.779781818  | 18.403047562 | O | 4.333410263  | 7.756573677  | 18.406490326 | O | 4.284049988  | 7.722057343  | 18.469833374 |
| O | 0.682322145  | 5.546416283  | 18.547670364 | O | 0.693199396  | 5.521867752  | 18.569137573 | O | 0.699794888  | 5.508305550  | 18.645366669 |
| O | 17.466211319 | 1.269166231  | 16.131185532 | O | 17.443975449 | 1.226918459  | 16.201387405 | O | 17.445833206 | 1.205174327  | 16.266658783 |
| O | 5.868328571  | -0.665641487 | 11.739880562 | O | 5.869352818  | -0.692350447 | 11.733864784 | O | 5.969923496  | -0.811619103 | 11.807218552 |
| O | 5.401036263  | 1.037227631  | 18.570898056 | O | 5.391835213  | 1.016212106  | 18.566089630 | O | 5.407529354  | 0.971584678  | 18.658506393 |
| O | 17.344684601 | 6.099981308  | 11.926458359 | O | 17.447164536 | 6.116373062  | 11.808820724 | O | 17.403842926 | 6.090521812  | 11.950323105 |
| O | 1.296122313  | -1.110493422 | 16.134504318 | O | 1.281944633  | -1.150815725 | 16.151786804 | O | 1.315208197  | -1.208275080 | 16.262601852 |
| O | -0.126991272 | 7.073798180  | 13.950494766 | O | -0.156645536 | 7.013326168  | 13.979181290 | O | -0.123884380 | 7.002125740  | 14.069184303 |
| O | 3.315004587  | 0.086519957  | 17.286897659 | O | 3.311798811  | 0.065164685  | 17.272993088 | O | 3.322804451  | 0.102235198  | 17.342271805 |
| O | 6.725277901  | 3.779914856  | 10.645770073 | O | 6.778434753  | 3.769388437  | 10.638133049 | O | 6.835209846  | 3.709126711  | 10.688201904 |
| O | 6.863813400  | 0.315022707  | 13.964197159 | O | 6.848668098  | 0.314104080  | 13.960775375 | O | 6.874197006  | 0.263327122  | 14.048738480 |
| O | 3.218044281  | 7.334125042  | 10.750447273 | O | 3.236361027  | 7.273322582  | 10.698515892 | O | 3.275826931  | 7.218042374  | 10.824041367 |
| O | -0.285647869 | 3.435987473  | 17.225290298 | O | -0.275782645 | 3.399369001  | 17.287454605 | O | -0.343004942 | 3.363255024  | 17.477611542 |
| O | 10.317064285 | 1.089256525  | 17.573982239 | O | 10.311822891 | 1.075826287  | 17.571975708 | O | 10.336163521 | 1.014737487  | 17.707679749 |
| O | 8.536729813  | -0.866580606 | 12.245507240 | O | 8.538704872  | -0.869933426 | 12.257242203 | O | 8.616702080  | -0.890212476 | 12.376537323 |
| O | 16.715530396 | 1.444563866  | 11.574231148 | O | 16.814735413 | 1.460496902  | 11.632246017 | O | 16.738378525 | 1.390018344  | 11.720886230 |
| O | 11.674983025 | -0.404860586 | 9.459272385  | O | 11.654295921 | -0.413043112 | 9.455817223  | O | 11.675281525 | -0.500880420 | 9.553773880  |
| O | 10.205205917 | 7.604387283  | 11.565629005 | O | 10.206546783 | 7.607362747  | 11.570034981 | O | 10.197875977 | 7.442549706  | 11.631106377 |
| O | 8.698982239  | 2.311985731  | 9.470235825  | O | 8.740058899  | 2.287422657  | 9.476248741  | O | 8.762884140  | 2.178028345  | 9.549192429  |

|    |              |              |              |    |              |              |              |    |              |              |              |
|----|--------------|--------------|--------------|----|--------------|--------------|--------------|----|--------------|--------------|--------------|
| O  | 14.935760498 | 6.213983059  | 10.298928261 | O  | 14.927382469 | 6.215487003  | 10.409854889 | O  | 14.959733963 | 6.116705418  | 10.428395271 |
| O  | 16.837013245 | 8.046000481  | 15.612092972 | O  | 16.819133759 | 8.002263069  | 15.649498940 | O  | 16.863681793 | 7.971834183  | 15.752757072 |
| O  | 15.218952179 | -0.226583481 | 16.290746689 | O  | 15.206891060 | -0.260540247 | 16.301940918 | O  | 15.234719276 | -0.322175145 | 16.410497665 |
| O  | 16.872150421 | 5.172238350  | 18.399644852 | O  | 16.881206512 | 5.128963470  | 18.456169128 | O  | 16.873121262 | 5.202558041  | 18.541610718 |
| O  | 8.787164688  | 5.813269138  | 16.222610474 | O  | 8.785036087  | 5.805523872  | 16.222967148 | O  | 8.810256004  | 5.756991863  | 16.340103149 |
| O  | 13.783555984 | 7.779322624  | 18.421968460 | O  | 13.780707359 | 7.793186188  | 18.460836411 | O  | 13.786461830 | 7.664305210  | 18.523181915 |
| O  | 9.969164848  | 5.578271866  | 18.599081039 | O  | 9.996643066  | 5.571160793  | 18.577032089 | O  | 10.034605980 | 5.491582870  | 18.692983627 |
| O  | 8.010643959  | 1.224658012  | 16.196113586 | O  | 8.007671356  | 1.218012094  | 16.187665939 | O  | 8.062204361  | 1.143342495  | 16.276338577 |
| O  | 14.858247757 | 8.453282356  | 11.711705208 | O  | 15.546584129 | -0.868382573 | 11.730690002 | O  | 14.908691406 | 8.385428429  | 11.811606407 |
| O  | 14.775817871 | 1.016341448  | 18.605117798 | O  | 14.788373947 | 1.028836012  | 18.592691422 | O  | 16.160144806 | 2.376061916  | 0.024750326  |
| O  | 8.148743629  | 5.894092560  | 11.897950172 | O  | 8.155759811  | 5.894668579  | 11.899825096 | O  | 8.057016373  | 5.849903584  | 12.052513123 |
| O  | 10.661139488 | -1.179310918 | 16.215908051 | O  | 10.657746315 | -1.185263395 | 16.218542099 | O  | 10.645749092 | -1.214422822 | 16.312604904 |
| O  | 9.281062126  | 7.112944126  | 13.968521118 | O  | 9.286478996  | 7.106082439  | 13.971096992 | O  | 9.305001259  | 7.007604599  | 14.071940422 |
| O  | 12.740459442 | 0.050159693  | 17.250841141 | O  | 12.740706444 | 0.049595356  | 17.256835938 | O  | 12.761147499 | -0.045412302 | 17.346940994 |
| O  | 16.241359711 | 3.840702295  | 10.606422424 | O  | 16.209814072 | 3.804724693  | 10.652781487 | O  | 16.259441376 | 3.755267620  | 10.671651840 |
| O  | 16.274541855 | 0.337414742  | 13.945236206 | O  | 16.292474747 | 0.327899575  | 13.981549263 | O  | 16.296419144 | 0.220855713  | 14.067390442 |
| O  | 12.639936447 | 7.319380760  | 10.672021866 | O  | 12.653512001 | 7.391990185  | 10.731127739 | O  | 12.669663429 | 7.271425247  | 10.809412956 |
| O  | 9.122172356  | 3.403634071  | 17.288183212 | O  | 9.133334160  | 3.392765522  | 17.282796860 | O  | 9.138629913  | 3.329612970  | 17.388843536 |
| O  | 3.807020426  | 2.346048355  | 15.164534569 | O  | 3.842041016  | 2.371280909  | 15.096754074 | O  | 3.400085926  | 2.485580683  | 14.895490646 |
| O  | 4.681992531  | 4.211413860  | 13.866741180 | O  | 4.755072594  | 4.253518105  | 13.879437447 | O  | 4.861024857  | 4.206180573  | 13.883729935 |
| O  | 1.329900026  | 4.048902988  | 11.693029404 | O  | 13.576369286 | 4.226506233  | 10.990174294 | O  | 1.508221507  | 3.467371941  | 15.345993042 |
| Cu | 3.991906881  | 2.554156303  | 13.406276703 | Cu | 4.060196877  | 2.618953705  | 13.342731476 | Cu | 4.067602158  | 2.722496986  | 12.989680290 |
| Cu | 4.357861519  | 3.990958691  | 15.831714630 | Cu | 4.388909340  | 3.996376514  | 15.818567276 | Cu | 4.364698887  | 4.041385651  | 15.755184174 |
| H  | 15.011323929 | 6.227602005  | 0.839345515  | H  | 15.107432365 | 6.303232670  | 0.435309887  | H  | 15.048567772 | 6.141510963  | 0.965257287  |
| H  | 3.506906033  | 0.416920781  | 14.249056816 | H  | 3.529768944  | 0.472390890  | 14.146821976 | H  | 3.015178919  | 0.478680015  | 13.319391251 |
| H  | 2.647739172  | 0.521985531  | 12.814534187 | H  | 2.701215506  | 0.568112850  | 12.697657585 | H  | 2.872694731  | 0.781826198  | 11.709354401 |
| H  | 4.280547619  | 0.139495015  | 12.771540642 | H  | 4.333451271  | 0.205379248  | 12.688133240 | H  | 4.315006256  | 0.261368871  | 12.319087982 |
| H  | 4.035911560  | 2.118106127  | 10.880875587 | H  | 4.006791115  | 2.298765898  | 10.785174370 | H  | 3.710410595  | 4.503634930  | 11.227144241 |
| H  | 3.155843735  | 3.468839645  | 11.298613548 | H  | 3.490385771  | 3.806862831  | 11.183539391 | H  | 5.040621758  | 3.609614134  | 10.855175018 |
| H  | 4.868209839  | 3.488772154  | 11.240872383 | H  | 5.118442535  | 3.450035095  | 11.208368301 | H  | 3.517846823  | 3.056009769  | 10.448927879 |
| H  | 14.288899422 | 5.486795425  | 10.204560280 | H  | 14.222352982 | 5.429628849  | 10.653306961 | H  | 14.318098068 | 5.387358665  | 10.320956230 |
| H  | 3.920503616  | 4.245009899  | 18.377887726 | H  | 3.922675610  | 4.207515240  | 18.343978882 | H  | 4.029031754  | 4.239252567  | 18.332490921 |
| H  | 2.729977846  | 3.308234692  | 17.656354904 | H  | 2.727056265  | 3.296050072  | 17.596519470 | H  | 2.695697784  | 3.553182125  | 17.608932495 |
| H  | 4.213743687  | 2.668145657  | 17.984796524 | H  | 4.198373795  | 2.629067183  | 17.938344955 | H  | 4.046828270  | 2.650213718  | 17.887485504 |
| H  | 5.725839615  | 6.131068230  | 15.539864540 | H  | 5.748958111  | 6.150432110  | 15.599141121 | H  | 5.829761505  | 6.161754131  | 15.653814316 |
| H  | 4.717743397  | 6.365595341  | 16.819292068 | H  | 4.727047920  | 6.336277008  | 16.875755310 | H  | 4.785531044  | 6.286251545  | 16.911819458 |
| H  | 6.050505161  | 5.447469711  | 17.003597260 | H  | 6.066276550  | 5.422216415  | 17.041788101 | H  | 6.122589111  | 5.368835449  | 17.072925568 |
| H  | -0.289133906 | 3.256293058  | 14.176177979 | H  | 13.145631790 | 4.215776443  | 11.862882614 | H  | 5.692852497  | 4.585545540  | 13.550615311 |
| H  | -0.684208214 | 4.446481705  | 12.882553101 | H  | 14.424530029 | 3.711222410  | 11.054140091 | N  | 3.505188942  | 0.873153925  | 12.510990143 |
| H  | 4.283193111  | 4.944628239  | 13.359234810 | H  | 4.457312584  | 5.027762890  | 13.364368439 | N  | 4.051103592  | 3.538036108  | 11.176505089 |
| N  | 3.554017305  | 0.688201427  | 13.260085106 | N  | 3.595329762  | 0.754768252  | 13.161429405 | N  | 3.719640017  | 3.579077721  | 17.596000671 |
| N  | 4.025890350  | 2.936887741  | 11.493951797 | N  | 4.162364483  | 3.075093508  | 11.434298515 | N  | 5.375677586  | 5.623193264  | 16.395002365 |
| N  | 3.730863333  | 3.518299103  | 17.667839050 | N  | 3.731722355  | 3.489800453  | 17.624570847 | N  | 2.021852732  | 2.543772697  | 14.764426231 |
| N  | 5.284158707  | 5.662043571  | 16.333520889 | N  | 5.302657604  | 5.651878357  | 16.372194290 |    |              |              |              |

|                                |              |              |              |            |              |              |              |                                |              |              |              |
|--------------------------------|--------------|--------------|--------------|------------|--------------|--------------|--------------|--------------------------------|--------------|--------------|--------------|
| N                              | 1.078590512  | 3.429271698  | 12.752414703 | N          | 12.569107056 | 3.330790997  | 16.754503250 |                                |              |              |              |
| N                              | -0.072413206 | 3.722470522  | 13.298513412 | N          | 12.883022308 | 3.803002834  | 17.711151123 |                                |              |              |              |
| <b>Structure L<sub>2</sub></b> |              |              |              | <b>ts4</b> |              |              |              | <b>Structure M<sub>2</sub></b> |              |              |              |
| Si                             | 0.115482330  | 2.480034351  | 8.279045105  | Si         | 0.134475172  | 2.517123222  | 8.287724495  | Si                             | 0.119776368  | 2.501265526  | 8.221027374  |
| Si                             | 7.932430267  | 0.684162259  | 3.140663862  | Si         | 7.941755295  | 0.684119821  | 3.141234636  | Si                             | 7.944416046  | 0.734181583  | 3.123152733  |
| Si                             | 2.406986237  | 8.168911934  | 1.004136324  | Si         | 2.406871080  | 8.218574524  | 0.990130424  | Si                             | 2.423340559  | 8.248470306  | 0.949544847  |
| Si                             | 5.523061275  | 8.295531273  | 1.162333608  | Si         | 5.526451588  | 8.294761658  | 1.170020819  | Si                             | 5.525856972  | 8.351650238  | 1.150067091  |
| Si                             | 7.876119137  | 0.645816326  | 6.274670124  | Si         | 7.898660183  | 0.658155620  | 6.274918556  | Si                             | 7.887881756  | 0.659878731  | 6.241838932  |
| Si                             | 0.081055343  | 5.649220467  | 8.401958466  | Si         | 0.075547934  | 5.684193611  | 8.410698891  | Si                             | 0.095345676  | 5.690226078  | 8.371236801  |
| Si                             | 0.112494797  | 7.945050240  | 6.299650669  | Si         | 0.159835428  | 7.981597424  | 6.309101105  | Si                             | 0.149304569  | 7.974666595  | 6.245423794  |
| Si                             | 5.567118168  | 0.436994433  | 8.418512344  | Si         | 5.592057228  | 0.439840317  | 8.425511360  | Si                             | 5.574357986  | 0.439947665  | 8.391364098  |
| Si                             | 2.443474293  | 0.377683818  | 8.268396378  | Si         | 2.473443985  | 0.414117575  | 8.292976379  | Si                             | 2.468825817  | 0.407278299  | 8.223978996  |
| Si                             | 0.119263157  | 8.029959679  | 3.192473412  | Si         | 0.139376298  | 8.049061775  | 3.218000174  | Si                             | 0.143402040  | 8.063338280  | 3.164836168  |
| Si                             | 7.941005707  | 3.002303839  | 0.996906102  | Si         | 7.949779510  | 2.992784977  | 0.985780597  | Si                             | 7.959906578  | 3.032463074  | 0.964835942  |
| Si                             | 9.528903961  | 2.487664461  | 8.184808731  | Si         | 9.562632561  | 2.490707159  | 8.188062668  | Si                             | 9.550640106  | 2.480286121  | 8.168644905  |
| Si                             | 17.381208420 | 0.729511380  | 3.190067530  | Si         | 17.387552261 | 0.738271058  | 3.212716579  | Si                             | 17.386655807 | 0.760194898  | 3.154954910  |
| Si                             | 11.773186684 | 8.183693886  | 0.989908099  | Si         | 11.782464027 | 8.188848495  | 0.996413767  | Si                             | 11.800987244 | 8.224415779  | 0.971231580  |
| Si                             | 14.886039734 | 8.401659966  | 1.249837995  | Si         | 14.899401665 | 8.419156075  | 1.258678913  | Si                             | 14.905604362 | 8.421990395  | 1.186671853  |
| Si                             | 17.317548752 | 0.629667997  | 6.321491241  | Si         | 17.344598770 | 0.664952874  | 6.328642845  | Si                             | 17.325483322 | 0.672949255  | 6.255105019  |
| Si                             | 9.513522148  | 5.643819809  | 8.402518272  | Si         | 9.543129921  | 5.647839546  | 8.416502953  | Si                             | 9.503908157  | 5.635839939  | 8.366359711  |
| Si                             | 9.540100098  | 7.933703899  | 6.276125431  | Si         | 9.547253609  | 7.934626579  | 6.279181004  | Si                             | 9.534489632  | 7.927870750  | 6.239320278  |
| Si                             | 14.978878975 | 0.494225919  | 8.423706055  | Si         | 15.003166199 | 0.501656771  | 8.433137894  | Si                             | 14.995194435 | 0.447637737  | 8.378806114  |
| Si                             | 11.844256401 | 0.354086816  | 8.211498260  | Si         | 11.863356590 | 0.354435563  | 8.208352089  | Si                             | 11.850406647 | 0.339397490  | 8.196851730  |
| Si                             | 9.511877060  | 7.992676735  | 3.168668270  | Si         | 9.516000748  | 7.986993790  | 3.170635939  | Si                             | 9.535379410  | 8.028600693  | 3.144182920  |
| Si                             | 17.291284561 | 3.006833315  | 1.016737342  | Si         | 17.323440552 | 3.030075312  | 1.046045661  | Si                             | 17.367439270 | 3.040442705  | 0.969139576  |
| Si                             | -0.606515527 | 1.730541825  | 17.649854660 | Si         | -0.583455682 | 1.780761123  | 17.661264420 | Si                             | -0.562252700 | 1.799655437  | 17.583597183 |
| Si                             | 7.218449593  | -0.015354216 | 12.506414413 | Si         | 7.259541035  | -0.024523318 | 12.499311447 | Si                             | 7.248407841  | -0.037550271 | 12.472746849 |
| Si                             | 1.721595168  | 7.433481216  | 10.369016647 | Si         | 1.735504150  | 7.471879005  | 10.389790535 | Si                             | 1.744769216  | 7.466176033  | 10.318245888 |
| Si                             | 4.827447891  | 7.594869614  | 10.602990150 | Si         | 4.848695755  | 7.588732243  | 10.577672958 | Si                             | 4.832819462  | 7.584134579  | 10.561035156 |
| Si                             | 7.182569504  | -0.080259681 | 15.637860298 | Si         | 7.208170414  | -0.097097397 | 15.640188217 | Si                             | 7.235817909  | -0.058744311 | 15.607893944 |
| Si                             | -0.609174848 | 4.917747974  | 17.792234421 | Si         | -0.607529044 | 4.948904514  | 17.798774719 | Si                             | -0.576244473 | 4.957860947  | 17.743162155 |
| Si                             | -0.552689612 | 7.209880352  | 15.664806366 | Si         | -0.583689630 | 7.244981766  | 15.672468185 | Si                             | -0.516747057 | 7.252688408  | 15.618978500 |
| Si                             | 4.855112553  | -0.256840229 | 17.754566193 | Si         | 4.876517296  | -0.274059534 | 17.744991302 | Si                             | 4.894696236  | -0.222627163 | 17.718450546 |
| Si                             | 1.725873232  | -0.364482045 | 17.645833969 | Si         | 1.744508266  | -0.336323619 | 17.624864578 | Si                             | 1.783447981  | -0.323159337 | 17.553474426 |
| Si                             | -0.556979299 | 7.301544189  | 12.565274239 | Si         | -0.553211272 | 7.339256763  | 12.573160172 | Si                             | -0.541451514 | 7.252864838  | 12.516427994 |
| Si                             | 7.272509098  | 2.248299360  | 10.348610878 | Si         | 7.319162846  | 2.237355947  | 10.364338875 | Si                             | 7.289008617  | 2.232533693  | 10.334939003 |
| Si                             | 8.853867531  | 1.734706640  | 17.619646072 | Si         | 8.854372978  | 1.731465220  | 17.607667923 | Si                             | 8.871747971  | 1.757150888  | 17.576068878 |
| Si                             | 16.692337036 | -0.020443678 | 12.567124367 | Si         | 16.700588226 | 0.023751676  | 12.578320503 | Si                             | 16.679477692 | -0.019558609 | 12.511246681 |
| Si                             | 11.081599236 | 7.454920292  | 10.328356743 | Si         | 11.099836349 | 7.465063095  | 10.335279465 | Si                             | 11.085974693 | 7.435347080  | 10.301255226 |
| Si                             | 14.186536789 | 7.670821190  | 10.614487648 | Si         | 14.203767776 | 7.700817585  | 10.629292488 | Si                             | 14.187573433 | 7.666128159  | 10.578964233 |
| Si                             | 16.624086380 | -0.108046293 | 15.682991028 | Si         | 16.613704681 | -0.043457747 | 15.691096306 | Si                             | 16.643791199 | -0.045113921 | 15.633484840 |
| Si                             | 8.809682846  | 4.892390251  | 17.750345230 | Si         | 8.814997673  | 4.892147064  | 17.764587402 | Si                             | 8.827311516  | 4.924024105  | 17.746242523 |
| Si                             | 8.841738701  | 7.213314056  | 15.633559227 | Si         | 8.880373001  | 7.203989983  | 15.650051117 | Si                             | 8.898227692  | 7.223125935  | 15.610109329 |
| Si                             | 14.287893295 | -0.284918308 | 17.789531708 | Si         | 14.303978920 | -0.250029683 | 17.815746307 | Si                             | 14.330343246 | -0.268292308 | 17.723024368 |

|    |              |              |              |    |              |              |              |    |              |              |              |
|----|--------------|--------------|--------------|----|--------------|--------------|--------------|----|--------------|--------------|--------------|
| Si | 11.147983551 | -0.375574231 | 17.627706528 | Si | 11.167928696 | -0.375403762 | 17.633762360 | Si | 11.193281174 | -0.350831270 | 17.577470779 |
| Si | 8.822120667  | 7.174859524  | 12.535997391 | Si | 8.846679688  | 7.160576820  | 12.542605400 | Si | 8.831214905  | 7.154314995  | 12.507973671 |
| Si | 16.636497498 | 2.274142265  | 10.387777328 | Si | 16.645389557 | 2.306616783  | 10.393523216 | Si | 16.646495819 | 2.252105236  | 10.329908371 |
| Al | 7.830226421  | 6.180408478  | 1.186844110  | Al | 7.820686817  | 6.176936150  | 1.188817501  | Al | 7.841575623  | 6.223735809  | 1.164476991  |
| Al | 17.381357193 | 6.164767742  | 1.240428686  | Al | 17.387460709 | 6.163547039  | 1.302853465  | Al | 17.400264740 | 6.167927265  | 1.217880964  |
| Al | 7.209494114  | 5.430332661  | 10.613772392 | Al | 7.229218483  | 5.422849655  | 10.621322632 | Al | 7.187767506  | 5.416747093  | 10.571565628 |
| Al | 16.680271149 | 5.425747871  | 10.589423180 | Al | 16.676643372 | 5.446161747  | 10.590081215 | Al | 16.717071533 | 5.401562214  | 10.572280884 |
| O  | 1.573575854  | 1.750034928  | 8.447566032  | O  | 1.587874174  | 1.779972315  | 8.459847450  | O  | 1.574773908  | 1.768274307  | 8.377218246  |
| O  | 0.010597736  | 0.065310434  | 3.062578678  | O  | 0.017802283  | 0.077783614  | 3.114636898  | O  | 0.013885051  | 0.088238493  | 3.109139442  |
| O  | 7.966183186  | 2.094535351  | 2.341101646  | O  | 7.976822853  | 2.087937832  | 2.331895590  | O  | 8.000733376  | 2.143151045  | 2.322337866  |
| O  | 2.910420895  | 0.211815894  | 0.243759334  | O  | 2.900109768  | 0.269447267  | 0.239840657  | O  | 2.963545322  | 0.293182552  | 0.177716061  |
| O  | 1.495423079  | 8.155695915  | 2.337109089  | O  | 1.479119539  | 8.184214592  | 2.310346127  | O  | 1.476229548  | 8.256625175  | 2.254095316  |
| O  | -0.109368600 | 2.883914948  | 0.247429624  | O  | -0.065007851 | 2.955102444  | 0.270134181  | O  | 0.004090166  | 3.019950628  | 0.238785878  |
| O  | 6.271038532  | 6.915634155  | 0.857359529  | O  | 6.244266987  | 6.893975735  | 0.895872056  | O  | 6.275550842  | 6.967092514  | 0.875549078  |
| O  | 8.101377487  | 8.699844360  | 6.444577217  | O  | 8.106903076  | 8.699185371  | 6.442361355  | O  | 8.099370003  | 8.701883316  | 6.361026764  |
| O  | 6.461787701  | 0.411345065  | 7.064900875  | O  | 6.483633995  | 0.442708731  | 7.069899082  | O  | 6.487470150  | 0.422111094  | 7.048573017  |
| O  | 8.149659157  | 5.818853378  | 9.210639954  | O  | 8.185323715  | 5.820210457  | 9.231376648  | O  | 8.136500359  | 5.799707890  | 9.167220116  |
| O  | 0.110972345  | 6.479061604  | 6.998142719  | O  | 0.117053628  | 6.517290115  | 7.009309292  | O  | 0.083222508  | 6.517296791  | 6.964589596  |
| O  | 4.951604843  | 8.396179199  | 9.180594444  | O  | 4.943500519  | 8.372573853  | 9.140089989  | O  | 4.918394089  | 8.384909630  | 9.130417824  |
| O  | 1.296893120  | 6.224541664  | 9.363528252  | O  | 1.268087626  | 6.272879601  | 9.392425537  | O  | 1.335207939  | 6.265293598  | 9.294532776  |
| O  | -0.682088733 | 1.864154816  | 6.990651608  | O  | -0.665893257 | 1.906952024  | 6.998557568  | O  | -0.688308239 | 1.924696326  | 6.915185928  |
| O  | 6.127967834  | 9.120042801  | 2.428253651  | O  | 6.132550716  | 9.119890213  | 2.436906576  | O  | 6.124203205  | 9.196926117  | 2.400512934  |
| O  | 6.072584152  | 1.593091846  | 9.440994263  | O  | 6.120347977  | 1.555095434  | 9.477403641  | O  | 6.089229584  | 1.572518587  | 9.430771828  |
| O  | 18.018932343 | 6.843227863  | 2.673197031  | O  | 18.029184341 | 6.857400417  | 2.725539923  | O  | 18.055473328 | 6.870188713  | 2.632298946  |
| O  | 1.910679102  | -0.484671742 | 7.009106159  | O  | 1.959672570  | -0.464280695 | 7.035743713  | O  | 1.949834108  | -0.473701060 | 6.968681335  |
| O  | 0.529531121  | 7.782853603  | 4.749214649  | O  | 0.601197958  | 7.814889431  | 4.763037682  | O  | 0.600595832  | 7.779899597  | 4.703292370  |
| O  | 4.004620552  | 0.774922252  | 8.059342384  | O  | 4.032183170  | 0.819926560  | 8.082531929  | O  | 4.024056435  | 0.815780282  | 7.999077320  |
| O  | 7.535740376  | 4.491885662  | 1.328909993  | O  | 7.550101280  | 4.483302116  | 1.317603469  | O  | 7.565136909  | 4.528655529  | 1.281898856  |
| O  | 7.529031754  | 0.925972581  | 4.707268238  | O  | 7.546896935  | 0.939161658  | 4.708532810  | O  | 7.520726681  | 0.969840527  | 4.683289528  |
| O  | 3.949780703  | 8.005064011  | 1.453376293  | O  | 3.941238880  | 8.049921036  | 1.451306939  | O  | 3.948724985  | 8.057991028  | 1.437412381  |
| O  | 0.389624178  | 4.071195126  | 8.081775665  | O  | 0.408774316  | 4.108395100  | 8.090744019  | O  | 0.375233412  | 4.101785183  | 8.069655418  |
| O  | 10.968693733 | 1.719013810  | 8.271367073  | O  | 11.006015778 | 1.729100227  | 8.275176048  | O  | 10.998922348 | 1.720054626  | 8.268901825  |
| O  | 9.418566704  | 0.034016609  | 3.066769838  | O  | 9.426963806  | 0.031347215  | 3.070991039  | O  | 9.419422150  | 0.058214217  | 3.057667255  |
| O  | 17.357553482 | 2.135950804  | 2.394180775  | O  | 17.398235321 | 2.131298542  | 2.397261143  | O  | 17.425642014 | 2.149804354  | 2.329962730  |
| O  | 12.311039925 | 0.236178532  | 0.253807455  | O  | 12.335365295 | 0.248286515  | 0.268830419  | O  | 12.379188538 | 0.272380084  | 0.216903299  |
| O  | 10.916909218 | 8.164022446  | 2.343680382  | O  | 10.923597336 | 8.164076805  | 2.347600222  | O  | 10.942625046 | 8.242148399  | 2.324908495  |
| O  | 9.404148102  | 2.891841173  | 0.246791899  | O  | 9.410868645  | 2.870047331  | 0.233443037  | O  | 9.406189919  | 2.886292458  | 0.188150197  |
| O  | 15.633338928 | 6.873032570  | 1.105835676  | O  | 15.649895668 | 6.888971806  | 1.119534135  | O  | 15.666156769 | 6.896152973  | 1.031061411  |
| O  | 17.476209641 | 8.636258125  | 6.453539371  | O  | 17.529026031 | 8.687767029  | 6.434019566  | O  | 17.528110504 | 8.706027985  | 6.332733631  |
| O  | 15.886840820 | 0.429871976  | 7.080439091  | O  | 15.927469254 | 0.444232166  | 7.103345394  | O  | 15.923073769 | 0.416482687  | 7.048725605  |
| O  | 17.502132416 | 5.826191902  | 9.131834984  | O  | 17.481472015 | 5.839052677  | 9.118814468  | O  | 17.540300369 | 5.893236160  | 9.148284912  |
| O  | 9.484626770  | 6.487260342  | 7.003601551  | O  | 9.493039131  | 6.494384766  | 7.019566059  | O  | 9.465208054  | 6.482058525  | 6.966565609  |
| O  | 14.456789970 | 8.463305473  | 9.234932899  | O  | 14.490374565 | 8.474511147  | 9.245377541  | O  | 14.491557121 | 8.406474113  | 9.176337242  |
| O  | 10.782304764 | 6.228364468  | 9.303460121  | O  | 10.824485779 | 6.231503487  | 9.308474541  | O  | 10.774970055 | 6.225335598  | 9.262605667  |

|   |              |              |              |   |              |              |              |   |              |              |              |
|---|--------------|--------------|--------------|---|--------------|--------------|--------------|---|--------------|--------------|--------------|
| O | 8.664789200  | 1.936442018  | 6.905468464  | O | 8.711964607  | 1.937654257  | 6.899796963  | O | 8.711192131  | 1.926598787  | 6.874467850  |
| O | 15.557847023 | 9.123621941  | 2.521353483  | O | 15.564790726 | 9.138067245  | 2.535349846  | O | 15.591376305 | 9.156890869  | 2.441850662  |
| O | 15.472856522 | 1.690609217  | 9.398748398  | O | 15.487817764 | 1.694939375  | 9.417722702  | O | 15.472198486 | 1.630334377  | 9.381684303  |
| O | 8.630581856  | 6.806467533  | 2.578318596  | O | 8.633788109  | 6.804261208  | 2.576409817  | O | 8.664509773  | 6.838197708  | 2.547078848  |
| O | 10.727962494 | 8.845125198  | 6.937193871  | O | 11.426348686 | -0.543056369 | 6.932513237  | O | 10.702005386 | 8.837118149  | 6.932581425  |
| O | 9.922884941  | 7.723991394  | 4.721301556  | O | 9.928243637  | 7.715845585  | 4.724615574  | O | 9.952828407  | 7.733665466  | 4.690106869  |
| O | 13.423330307 | 0.740909576  | 8.053672791  | O | 13.448865891 | 0.725825131  | 8.049906731  | O | 13.440391541 | 0.677601695  | 7.997921944  |
| O | 16.903764725 | 4.520658493  | 1.340863943  | O | 16.911104202 | 4.523031712  | 1.424291492  | O | 16.903863907 | 4.527673721  | 1.326350331  |
| O | 17.004539490 | 0.966656387  | 4.757104874  | O | 16.997621536 | 1.004141927  | 4.770549297  | O | 16.945976257 | 1.019967794  | 4.703127861  |
| O | 13.343558311 | 7.994600296  | 1.441821456  | O | 13.359126091 | 8.003257751  | 1.441209912  | O | 13.371841431 | 8.004982948  | 1.420429587  |
| O | 9.830080032  | 4.075658798  | 8.035818100  | O | 9.856636047  | 4.080154896  | 8.045320511  | O | 9.839098930  | 4.069400311  | 8.011236191  |
| O | 0.836188316  | 0.983945012  | 17.823539734 | O | 0.879534364  | 1.050642014  | 17.742742538 | O | 0.883255363  | 1.037418842  | 17.636442184 |
| O | -0.657808423 | -0.657112122 | 12.502125740 | O | -0.639356136 | -0.602410078 | 12.534916878 | O | -0.739156902 | -0.781304598 | 12.397070885 |
| O | 7.405985832  | 1.402247906  | 11.745176315 | O | 7.465566158  | 1.407826662  | 11.769600868 | O | 7.437897205  | 1.386734128  | 11.727134705 |
| O | 2.285140753  | -0.487711072 | 9.654655457  | O | 2.298326254  | -0.445215583 | 9.682683945  | O | 2.309664249  | -0.451554060 | 9.614912987  |
| O | 0.823096693  | 7.476252556  | 11.717158318 | O | 0.837871373  | 7.523983002  | 11.744504929 | O | 0.795957923  | 7.485803127  | 11.636206627 |
| O | -0.751928985 | 2.187690735  | 9.631102562  | O | -0.735741735 | 2.232839108  | 9.644946098  | O | -0.745519876 | 2.167448044  | 9.570495605  |
| O | 5.673927307  | 6.256730556  | 10.613677025 | O | 5.692409992  | 6.249261379  | 10.585456848 | O | 5.639666080  | 6.219761372  | 10.526038170 |
| O | 7.346025944  | 7.912869930  | 15.719209671 | O | 7.398935318  | 7.918829441  | 15.768471718 | O | 7.429093838  | 7.958116055  | 15.731116295 |
| O | 5.742143631  | -0.329167545 | 16.378261566 | O | 5.766017914  | -0.355978191 | 16.373193741 | O | 5.813773155  | -0.324966967 | 16.375942230 |
| O | 7.369629860  | 5.038364887  | 18.443088531 | O | 7.374763489  | 5.043028355  | 18.455047607 | O | 7.383505344  | 5.084637642  | 18.426702499 |
| O | -0.563560128 | 5.746322155  | 16.374458313 | O | -0.661143363 | 5.799218178  | 16.400884628 | O | -0.604101896 | 5.793582916  | 16.332693100 |
| O | 4.271402836  | 7.698378563  | 18.496843338 | O | 4.282056332  | 7.687422752  | 18.500314713 | O | 4.250743389  | 7.735854149  | 18.473405838 |
| O | 0.641818762  | 5.457135201  | 18.719594955 | O | 0.653701663  | 5.518194675  | 18.684961319 | O | 0.663093805  | 5.537344933  | 18.654270172 |
| O | 17.447898865 | 1.145573497  | 16.332231522 | O | 17.446846008 | 1.216494918  | 16.340633392 | O | 17.382888794 | 1.242991567  | 16.325431824 |
| O | 5.913838863  | -0.778794169 | 11.851863861 | O | 5.970045567  | -0.767242074 | 11.796358109 | O | 5.977010727  | -0.819647610 | 11.800148964 |
| O | 5.416991234  | 0.953456759  | 18.669889450 | O | 5.421723843  | 0.942898989  | 18.662038803 | O | 5.407639503  | 0.978620648  | 18.670286179 |
| O | 17.347444534 | 6.134422779  | 12.000597954 | O | 17.355438232 | 6.185226917  | 11.980476379 | O | -1.374409676 | 5.951185226  | 12.037410736 |
| O | 1.258925796  | -1.205378413 | 16.330244064 | O | 1.249554753  | -1.194040298 | 16.331874847 | O | 1.344339132  | -1.220623851 | 16.268350601 |
| O | -0.131793737 | 6.993272781  | 14.110532761 | O | -0.163355887 | 7.019342422  | 14.122789383 | O | -0.117085218 | 7.007389069  | 14.069159508 |
| O | 3.289327383  | 0.069496870  | 17.410169601 | O | 3.310440540  | 0.057760954  | 17.387672424 | O | 3.339744806  | 0.117450118  | 17.311611176 |
| O | 6.795348167  | 3.734517097  | 10.692950249 | O | 6.833931446  | 3.723995686  | 10.685623169 | O | 6.811629295  | 3.715842724  | 10.683964729 |
| O | 6.862549305  | 0.280449867  | 14.080686569 | O | 6.888616562  | 0.225170016  | 14.075974464 | O | 6.892652035  | 0.238163471  | 14.048944473 |
| O | 3.253237724  | 7.195176125  | 10.849004745 | O | 3.267960548  | 7.215380192  | 10.852126122 | O | 3.252724886  | 7.227096558  | 10.851727486 |
| O | -0.353235245 | 3.328664303  | 17.476657867 | O | -0.295830250 | 3.370333433  | 17.427051544 | O | -0.247723222 | 3.389068842  | 17.349132538 |
| O | 10.314706802 | 1.014215946  | 17.727540970 | O | 10.310394287 | 0.999490023  | 17.704969406 | O | 10.327954292 | 1.020381451  | 17.671274185 |
| O | 8.575263023  | -0.878662348 | 12.378813744 | O | 8.612838745  | -0.889379978 | 12.371530533 | O | 8.626135826  | -0.875535965 | 12.361446381 |
| O | 16.690876007 | 1.369334459  | 11.745326996 | O | 16.733730316 | 1.414017439  | 11.760462761 | O | 16.741416931 | 1.375309229  | 11.705003738 |
| O | 11.628065109 | -0.490342677 | 9.595739365  | O | 11.636460304 | -0.485120803 | 9.594325066  | O | 11.647979736 | -0.494760245 | 9.591245651  |
| O | 10.171502113 | 7.439959049  | 11.657342911 | O | 10.201060295 | 7.429619312  | 11.670081139 | O | 10.198265076 | 7.394873619  | 11.641998291 |
| O | 8.698881149  | 2.164984941  | 9.557312012  | O | 8.737792969  | 2.153969765  | 9.559439659  | O | 8.713977814  | 2.150008202  | 9.532847404  |
| O | 14.928862572 | 6.133901596  | 10.438666344 | O | 14.930550575 | 6.158806801  | 10.468264580 | O | 14.975587845 | 6.139143944  | 10.493015289 |
| O | 16.816761017 | 7.914956570  | 15.784943581 | O | 16.803792953 | 7.986713409  | 15.792130470 | O | 16.892827988 | 8.023821831  | 15.752013206 |
| O | 15.201860428 | -0.338163197 | 16.448005676 | O | 15.203566551 | -0.273900986 | 16.463895798 | O | 15.221156120 | -0.349038303 | 16.365087509 |

|    |              |              |              |    |              |              |              |    |              |              |              |
|----|--------------|--------------|--------------|----|--------------|--------------|--------------|----|--------------|--------------|--------------|
| O  | 16.825391769 | 5.149250984  | 18.530336380 | O  | 16.849678040 | 5.088543415  | 18.590826035 | O  | 16.858642578 | 5.088326931  | 18.496040344 |
| O  | 8.778962135  | 5.753974915  | 16.348928452 | O  | 8.806889534  | 5.741832256  | 16.357738495 | O  | 8.829229355  | 5.772439480  | 16.342151642 |
| O  | 13.777720451 | 7.682121277  | 18.586683273 | O  | 13.813288689 | 7.711229324  | 18.602382660 | O  | 13.775839806 | 7.687989235  | 18.509174347 |
| O  | 10.027239799 | 5.481914043  | 18.693935394 | O  | 10.036277771 | 5.485212326  | 18.705842972 | O  | 10.040798187 | 5.517024040  | 18.693660736 |
| O  | 8.006652832  | 1.140785217  | 16.336816788 | O  | 8.009777069  | 1.155031443  | 16.315292358 | O  | 8.043368340  | 1.199220896  | 16.266572952 |
| O  | 14.898027420 | 8.352427483  | 11.890592575 | O  | 14.917998314 | 8.394483566  | 11.899062157 | O  | 14.827615738 | 8.411805153  | 11.856799126 |
| O  | 16.122457504 | 2.395099878  | 0.045299876  | O  | 16.169395447 | 2.429577112  | 0.056269825  | O  | 14.891010284 | 0.905872464  | 18.678932190 |
| O  | 8.034991264  | 5.859916687  | 12.093923569 | O  | 8.063451767  | 5.842807770  | 12.100387573 | O  | 8.014682770  | 5.863639832  | 12.049414635 |
| O  | 10.621552467 | -1.224551558 | 16.352691650 | O  | 10.696949005 | -1.261707067 | 16.361915588 | O  | 10.723896980 | -1.228247046 | 16.295415878 |
| O  | 9.290937424  | 7.048888683  | 14.095631599 | O  | 9.306610107  | 7.045230865  | 14.104561806 | O  | 9.300879478  | 7.006388664  | 14.067203522 |
| O  | 12.728822708 | -0.059444308 | 17.399271011 | O  | 12.747694969 | -0.016686797 | 17.435541153 | O  | 12.772551537 | 0.016576886  | 17.377162933 |
| O  | 16.253217697 | 3.774206638  | 10.790393829 | O  | 16.235475540 | 3.799584866  | 10.786461830 | O  | 16.245126724 | 3.757302761  | 10.698544502 |
| O  | 16.286211014 | 0.236476660  | 14.122557640 | O  | 16.284221649 | 0.298708320  | 14.129866600 | O  | 16.323228836 | 0.280365229  | 14.069443703 |
| O  | 12.644174576 | 7.283478737  | 10.838660240 | O  | 12.661360741 | 7.335769653  | 10.862517357 | O  | 12.656265259 | 7.248900890  | 10.794105530 |
| O  | 9.128550529  | 3.324112415  | 17.391592026 | O  | 9.134032249  | 3.322947979  | 17.410749435 | O  | 9.147310257  | 3.352840900  | 17.409698486 |
| O  | 3.626781464  | 2.465061188  | 14.723155975 | O  | 3.383924961  | 2.602899790  | 14.688029289 | O  | 3.974496365  | 2.361491203  | 14.944974899 |
| O  | 4.757224560  | 4.423737049  | 13.763305664 | O  | 4.715037346  | 4.519016743  | 13.734504700 | O  | 4.625803471  | 4.532703400  | 13.876693726 |
| O  | 1.689139247  | 2.480835438  | 15.700318336 | O  | 1.309312701  | 4.511401653  | 14.748249054 | O  | 0.771939516  | 1.831836939  | 13.943786621 |
| Cu | 3.999077797  | 2.936799765  | 12.805821419 | Cu | 3.942098141  | 2.954027176  | 12.883110046 | Cu | 3.934052467  | 2.900642157  | 13.080323219 |
| Cu | 4.447317123  | 4.064069748  | 15.644113541 | Cu | 4.384681702  | 3.979948044  | 15.585240364 | Cu | 4.452426910  | 4.032320023  | 15.755614281 |
| H  | 14.996109009 | 6.138527393  | 1.013542295  | H  | 15.006848335 | 6.162452221  | 1.004136086  | H  | 15.024759293 | 6.162827969  | 0.950779378  |
| H  | 2.791259766  | 0.766912818  | 12.941082954 | H  | 3.150395870  | 0.556626678  | 13.134336472 | H  | 2.272908211  | 1.071688771  | 12.987510681 |
| H  | 2.975819349  | 1.008753896  | 11.324773788 | H  | 2.888530493  | 0.889030337  | 11.538458824 | H  | 3.035114527  | 0.951624632  | 11.516652107 |
| H  | 4.249001026  | 0.454918385  | 12.213718414 | H  | 4.397108078  | 0.528687596  | 12.079939842 | H  | 3.785497427  | 0.358844519  | 12.854166031 |
| H  | 3.693429470  | 4.788002968  | 11.101910591 | H  | 3.731964111  | 4.718452930  | 11.059046745 | H  | 3.719762087  | 4.711521626  | 11.312222481 |
| H  | 4.890792370  | 3.759967804  | 10.638895035 | H  | 4.949950218  | 3.691566467  | 10.690808296 | H  | 4.902513981  | 3.668345451  | 10.875200272 |
| H  | 3.289273262  | 3.371936083  | 10.343232155 | H  | 3.381969213  | 3.284638405  | 10.312761307 | H  | 3.309520483  | 3.300965786  | 10.557654381 |
| H  | 14.281552315 | 5.413198948  | 10.311326027 | H  | 14.278519630 | 5.440982819  | 10.351129532 | H  | 14.336275101 | 5.402225018  | 10.419751167 |
| H  | 4.078220844  | 4.217507362  | 18.225896835 | H  | 3.915074587  | 4.126757145  | 18.185327530 | H  | 3.986375332  | 4.245899677  | 18.330316544 |
| H  | 2.881361961  | 3.314477444  | 17.484365463 | H  | 2.810255289  | 3.125335217  | 17.446060181 | H  | 2.756386042  | 3.386432886  | 17.615491867 |
| H  | 4.353069782  | 2.655053139  | 17.803436279 | H  | 4.321311951  | 2.594420910  | 17.784217834 | H  | 4.203680038  | 2.669623613  | 17.926939011 |
| H  | 5.885241985  | 6.213190556  | 15.648062706 | H  | 5.882385731  | 6.071799278  | 15.627096176 | H  | 5.789135933  | 6.208860397  | 15.664011002 |
| H  | 4.785612106  | 6.286004066  | 16.859252930 | H  | 4.785818100  | 6.191486359  | 16.831754684 | H  | 4.751648426  | 6.298108101  | 16.927326202 |
| H  | 6.130001068  | 5.386314392  | 17.056600571 | H  | 6.116801739  | 5.284001827  | 17.056701660 | H  | 6.129765511  | 5.441708565  | 17.089439392 |
| H  | 5.580153942  | 4.817147732  | 13.423875809 | H  | 5.604264736  | 4.782821655  | 13.436532021 | H  | 5.496014595  | 4.809517860  | 13.536605835 |
| H  | 0.093630791  | 4.329583645  | 14.018201828 | H  | 0.780085802  | 1.531858325  | 13.537920952 | H  | -0.754648089 | 4.409028530  | 13.208500862 |
| H  | -0.863456130 | 3.692195892  | 12.872473717 | H  | 2.226041317  | 2.010936260  | 14.722305298 | H  | 3.253265619  | 1.825021386  | 15.314662933 |
| H  | -0.223096848 | 2.733993530  | 14.026260376 | H  | 0.297147274  | 2.066608429  | 15.053491592 | H  | -0.894943833 | 3.328698635  | 14.647850037 |
| N  | 3.448211432  | 1.103765845  | 12.228557587 | N  | 3.535323858  | 1.040807962  | 12.319398880 | N  | 3.193228245  | 1.120905995  | 12.513106346 |
| N  | 3.928173780  | 3.793092728  | 11.021236420 | N  | 3.970211744  | 3.722079515  | 11.025936127 | N  | 3.937132597  | 3.711469650  | 11.252268791 |
| N  | 3.885759830  | 3.515909672  | 17.489835739 | N  | 3.792843580  | 3.411495686  | 17.452125549 | N  | 3.768257618  | 3.542659998  | 17.604082108 |
| N  | 5.409706116  | 5.646196365  | 16.353816986 | N  | 5.401042938  | 5.528724194  | 16.346738815 | N  | 5.369801998  | 5.658840179  | 16.416088104 |
| N  | 2.348624706  | 1.979320645  | 14.823780060 | N  | 1.615556359  | 3.728873730  | 13.941346169 | N  | 0.485817015  | 2.845491409  | 13.258993149 |
| N  | -0.008782864 | 3.516867876  | 13.405039787 | N  | 1.077118158  | 1.992815971  | 14.399336815 | N  | -0.460527301 | 3.589919329  | 13.754899979 |

| Structure N <sub>2</sub> |              |              |              | Structure O <sub>2</sub> |              |              | Structure P <sub>2</sub> |    |              |              |              |
|--------------------------|--------------|--------------|--------------|--------------------------|--------------|--------------|--------------------------|----|--------------|--------------|--------------|
| Si                       | 0.130352736  | 2.512420654  | 8.197725296  | Si                       | 0.114696443  | 2.468727589  | 8.182585716              | Si | 0.111344039  | 2.443337202  | 8.249779701  |
| Si                       | 7.952978134  | 0.735113561  | 3.111871481  | Si                       | 7.931901455  | 0.723283291  | 3.105977058              | Si | 7.950971127  | 0.683286905  | 3.169215918  |
| Si                       | 2.446456194  | 8.227173805  | 0.902027845  | Si                       | 2.424883604  | 8.196546555  | 0.904668450              | Si | 2.419319868  | 8.218028069  | 0.950245500  |
| Si                       | 5.536282063  | 8.344120979  | 1.143295646  | Si                       | 5.511710167  | 8.326664925  | 1.136605024              | Si | 5.530155659  | 8.295038223  | 1.184905887  |
| Si                       | 7.891477108  | 0.668753743  | 6.224248886  | Si                       | 7.860537529  | 0.653152645  | 6.223788738              | Si | 7.855834484  | 0.619890094  | 6.277751446  |
| Si                       | 0.089865208  | 5.698505402  | 8.312045097  | Si                       | 0.061341703  | 5.640662193  | 8.305376053              | Si | 0.053642452  | 5.616729259  | 8.341883659  |
| Si                       | 0.154376090  | 7.987277985  | 6.206350803  | Si                       | 0.139259964  | 7.947826385  | 6.201116562              | Si | 0.121147633  | 7.915413857  | 6.251277924  |
| Si                       | 5.579743862  | 0.444205821  | 8.375821114  | Si                       | 5.574618340  | 0.393805981  | 8.387970924              | Si | 5.570557117  | 0.380983055  | 8.431371689  |
| Si                       | 2.470530748  | 0.415346265  | 8.203131676  | Si                       | 2.438155651  | 0.357910931  | 8.215163231              | Si | 2.441074848  | 0.338625968  | 8.260749817  |
| Si                       | 0.152915314  | 8.079949379  | 3.115981102  | Si                       | 0.126014963  | 8.040218353  | 3.109357595              | Si | 0.144371107  | 8.038809776  | 3.164861679  |
| Si                       | 7.966885567  | 3.025698185  | 0.946572661  | Si                       | 7.943994522  | 3.006068230  | 0.945806324              | Si | 7.979905128  | 2.983993053  | 1.012683153  |
| Si                       | 9.553073883  | 2.495210409  | 8.151535988  | Si                       | 9.526038170  | 2.488716125  | 8.148837090              | Si | 9.509654999  | 2.456408739  | 8.222276688  |
| Si                       | 17.407178879 | 0.775431395  | 3.106680155  | Si                       | 17.375539780 | 0.734485269  | 3.097322464              | Si | 17.384641647 | 0.728411436  | 3.171834707  |
| Si                       | 11.828331947 | 8.219242096  | 0.961227000  | Si                       | 11.781563759 | 8.195757866  | 0.932431221              | Si | 11.794302940 | 8.182131767  | 1.018428922  |
| Si                       | 14.918011665 | 8.422485352  | 1.173078060  | Si                       | 14.892510414 | 8.398731232  | 1.142660022              | Si | 14.904443741 | 8.378021240  | 1.225553393  |
| Si                       | 17.336641312 | 0.681060195  | 6.221400738  | Si                       | 17.321788788 | 0.638053894  | 6.207583427              | Si | 17.301963806 | 0.598798394  | 6.278441429  |
| Si                       | 9.515592575  | 5.640215874  | 8.352197647  | Si                       | 9.464817047  | 5.631284237  | 8.350779533              | Si | 9.464082718  | 5.594532967  | 8.434246063  |
| Si                       | 9.540044785  | 7.935642719  | 6.218698978  | Si                       | 9.520882607  | 7.928667545  | 6.211384773              | Si | 9.499467850  | 7.880397797  | 6.286867619  |
| Si                       | 15.006360054 | 0.457326412  | 8.331088066  | Si                       | 14.973586082 | 0.450791597  | 8.309293747              | Si | 14.960297585 | 0.427137554  | 8.378615379  |
| Si                       | 11.854789734 | 0.349606812  | 8.174569130  | Si                       | 11.843508720 | 0.356768787  | 8.142406464              | Si | 11.816622734 | 0.316723406  | 8.227049828  |
| Si                       | 9.548726082  | 8.030695915  | 3.123834372  | Si                       | 9.534432411  | 8.011036873  | 3.116848946              | Si | 9.537428856  | 7.987633228  | 3.196099758  |
| Si                       | 17.388355255 | 3.041061640  | 0.910179734  | Si                       | 17.329238892 | 3.017307997  | 0.910140991              | Si | 17.374763489 | 2.993640184  | 0.978765190  |
| Si                       | -0.535605013 | 1.775643110  | 17.530279160 | Si                       | -0.578164220 | 1.754514694  | 17.517448425             | Si | -0.566888571 | 1.748795152  | 17.583673477 |
| Si                       | 7.269649029  | -0.053793430 | 12.454180717 | Si                       | 7.196374416  | -0.059327960 | 12.441770554             | Si | 7.191082954  | -0.096291304 | 12.518802643 |
| Si                       | 1.737619281  | 7.471636772  | 10.281531334 | Si                       | 1.707958460  | 7.404892445  | 10.279767990             | Si | 1.708262205  | 7.390047073  | 10.323700905 |
| Si                       | 4.835537910  | 7.574391365  | 10.534492493 | Si                       | 4.817097187  | 7.567820549  | 10.553808212             | Si | 4.817150593  | 7.545325756  | 10.612080574 |
| Si                       | 7.258540154  | -0.086144567 | 15.593147278 | Si                       | 7.211692810  | -0.110671163 | 15.586790085             | Si | 7.234954834  | -0.113325000 | 15.661707878 |
| Si                       | -0.535439909 | 4.952492714  | 17.712442398 | Si                       | -0.565994442 | 4.917221069  | 17.699090958             | Si | -0.570926368 | 4.919941902  | 17.752683640 |
| Si                       | -0.498747349 | 7.225736618  | 15.558060646 | Si                       | -0.538036227 | 7.210618973  | 15.566229820             | Si | -0.516364336 | 7.205481529  | 15.613725662 |
| Si                       | 4.907024384  | -0.232898712 | 17.701848984 | Si                       | 4.865252495  | -0.260298967 | 17.703891754             | Si | 4.891149521  | -0.270316720 | 17.775306702 |
| Si                       | 1.798049808  | -0.326072216 | 17.493013382 | Si                       | 1.765698671  | -0.356092691 | 17.503477097             | Si | 1.780503750  | -0.361819386 | 17.540512085 |
| Si                       | -0.557118714 | 7.280365467  | 12.464865685 | Si                       | -0.576834559 | 7.261595726  | 12.462653160             | Si | -0.576385856 | 7.251837730  | 12.508466721 |
| Si                       | 7.287685871  | 2.237386227  | 10.326229095 | Si                       | 7.276339531  | 2.217948437  | 10.329031944             | Si | 7.250479221  | 2.196605206  | 10.394701004 |
| Si                       | 8.884553909  | 1.733279228  | 17.556243896 | Si                       | 8.851483345  | 1.720941424  | 17.540714264             | Si | 8.892760277  | 1.709705114  | 17.628629684 |
| Si                       | 16.711048126 | -0.006884038 | 12.470926285 | Si                       | 16.697975159 | -0.031781077 | 12.451489449             | Si | 16.694967270 | -0.035761654 | 12.516998291 |
| Si                       | 11.102359772 | 7.442449093  | 10.276663780 | Si                       | 11.071802139 | 7.456654549  | 10.278009415             | Si | 11.056739807 | 7.421366692  | 10.340324402 |
| Si                       | 14.210269928 | 7.668696880  | 10.510771751 | Si                       | 14.173239708 | 7.646264553  | 10.498358727             | Si | 14.161502838 | 7.642454147  | 10.581047058 |
| Si                       | 16.672300339 | -0.090524554 | 15.595727921 | Si                       | 16.634458542 | -0.093799710 | 15.575478554             | Si | 16.643014908 | -0.093538642 | 15.642925262 |
| Si                       | 8.847839355  | 4.903630733  | 17.725671768 | Si                       | 8.799714088  | 4.887957096  | 17.692884445             | Si | 8.798598289  | 4.885544777  | 17.779745102 |
| Si                       | 8.923949242  | 7.191486835  | 15.592132568 | Si                       | 8.855919838  | 7.189713478  | 15.574999809             | Si | 8.880965233  | 7.178039074  | 15.660260201 |
| Si                       | 14.343059540 | -0.255001307 | 17.695680618 | Si                       | 14.303132057 | -0.276811004 | 17.685922623             | Si | 14.335027695 | -0.314149022 | 17.757045746 |
| Si                       | 11.228502274 | -0.370680928 | 17.549936295 | Si                       | 11.168274879 | -0.382471561 | 17.538850784             | Si | 11.199228287 | -0.391416550 | 17.636827469 |
| Si                       | 8.855527878  | 7.141119003  | 12.492360115 | Si                       | 8.825441360  | 7.139856339  | 12.460900307             | Si | 8.814754486  | 7.094375134  | 12.560658455 |

|    |              |              |              |    |              |              |              |    |              |              |              |
|----|--------------|--------------|--------------|----|--------------|--------------|--------------|----|--------------|--------------|--------------|
| Si | 16.664699554 | 2.267887354  | 10.301002502 | Si | 16.632085800 | 2.247522593  | 10.286477089 | Si | 16.628005981 | 2.239156961  | 10.342350006 |
| Al | 7.859497547  | 6.219502449  | 1.136362314  | Al | 7.846866131  | 6.197506905  | 1.130818963  | Al | 7.830529213  | 6.183343410  | 1.186918378  |
| Al | 17.442802429 | 6.193457127  | 1.181466699  | Al | 17.398155212 | 6.155226707  | 1.164327502  | Al | 17.416494370 | 6.143757820  | 1.218324065  |
| Al | 7.196174622  | 5.409053802  | 10.571673393 | Al | 7.188706875  | 5.377821445  | 10.574520111 | Al | 7.177722454  | 5.336668491  | 10.689601898 |
| Al | 16.690620422 | 5.423986435  | 10.496042252 | Al | 16.655279160 | 5.397583008  | 10.492576599 | Al | 16.650865555 | 5.388442039  | 10.533980370 |
| O  | 1.588801980  | 1.782778263  | 8.349723816  | O  | 1.566168070  | 1.733154178  | 8.360699654  | O  | 1.571112871  | 1.715153933  | 8.412319183  |
| O  | 0.035162106  | 0.109079301  | 3.018809557  | O  | 0.004150152  | 0.066412777  | 3.026890278  | O  | 0.009797081  | 0.058641851  | 3.094059706  |
| O  | 8.006445885  | 2.142693520  | 2.308244944  | O  | 8.006422043  | 2.137528896  | 2.315480471  | O  | 8.027534485  | 2.083492756  | 2.357418299  |
| O  | 2.990192890  | 0.260884225  | 0.099770173  | O  | 2.985732794  | 0.234895229  | 0.114628874  | O  | 2.940117359  | 0.248394042  | 0.157881171  |
| O  | 1.477746606  | 8.241789818  | 2.188698292  | O  | 1.452788830  | 8.218683243  | 2.188366890  | O  | 1.478057623  | 8.234743118  | 2.260495186  |
| O  | 0.014755426  | 2.945805788  | 0.165786698  | O  | -0.057783622 | 2.955021620  | 0.139510453  | O  | -0.000372691 | 2.913976908  | 0.232115313  |
| O  | 6.291099072  | 6.963498116  | 0.852259338  | O  | 6.283632278  | 6.953882694  | 0.875516653  | O  | 6.246261120  | 6.890712738  | 0.931225598  |
| O  | 8.104091644  | 8.711157799  | 6.334733486  | O  | 8.083238602  | 8.700817108  | 6.336760044  | O  | 8.065317154  | 8.659618378  | 6.393823147  |
| O  | 6.495277405  | 0.425748587  | 7.037115574  | O  | 6.452578068  | 0.410494328  | 7.020626545  | O  | 6.446435928  | 0.375112176  | 7.067065239  |
| O  | 8.152727127  | 5.775998592  | 9.169630051  | O  | 8.073603630  | 5.751581669  | 9.121137619  | O  | 8.111882210  | 5.708634377  | 9.273675919  |
| O  | 0.094606817  | 6.512793541  | 6.893924236  | O  | 0.086392105  | 6.483488560  | 6.906248093  | O  | 0.075323403  | 6.438859463  | 6.931295395  |
| O  | 4.938931465  | 8.390646935  | 9.118389130  | O  | 4.966655731  | 8.328737259  | 9.107241631  | O  | 4.982490540  | 8.331982613  | 9.182977676  |
| O  | 1.319164753  | 6.286612511  | 9.247383118  | O  | 1.273977518  | 6.202771664  | 9.272516251  | O  | 1.269386292  | 6.206485748  | 9.293549538  |
| O  | -0.688318253 | 1.926003575  | 6.905050755  | O  | 18.156185150 | 1.875526071  | 6.883062363  | O  | 18.136438370 | 1.821001410  | 6.978196621  |
| O  | 6.142914772  | 9.184788704  | 2.391914606  | O  | 6.107033730  | 9.204864502  | 2.364674568  | O  | 6.150236607  | 9.130885124  | 2.438373327  |
| O  | 6.087295532  | 1.577051759  | 9.423541069  | O  | 6.096674919  | 1.524346471  | 9.425649643  | O  | 6.086316109  | 1.528536797  | 9.455801964  |
| O  | 18.056020737 | 6.873311043  | 2.630313635  | O  | 18.033031464 | 6.845671654  | 2.592648983  | O  | 18.056882858 | 6.841137886  | 2.643147230  |
| O  | 1.945983171  | -0.470886886 | 6.956796646  | O  | 1.935750961  | -0.495717824 | 6.931857586  | O  | 1.904849768  | -0.540866435 | 7.014984131  |
| O  | 0.619177997  | 7.847470760  | 4.661296844  | O  | 0.581637681  | 7.777438641  | 4.652047157  | O  | 0.593652487  | 7.775584221  | 4.710914135  |
| O  | 4.031113148  | 0.814435124  | 7.980750561  | O  | 4.006785393  | 0.740577161  | 8.050650597  | O  | 4.007366657  | 0.717038929  | 8.061719894  |
| O  | 7.580860615  | 4.524902821  | 1.263038635  | O  | 7.546439171  | 4.505185604  | 1.249356866  | O  | 7.608590126  | 4.482977390  | 1.334174514  |
| O  | 7.525259495  | 0.991452336  | 4.667679310  | O  | 7.499138355  | 0.964308143  | 4.662193775  | O  | 7.506724358  | 0.948945045  | 4.720660210  |
| O  | 3.961239100  | 8.063685417  | 1.439563513  | O  | 3.940304279  | 8.010297775  | 1.431583166  | O  | 3.942911863  | 8.059656143  | 1.455104709  |
| O  | 0.388893902  | 4.109798431  | 8.026412010  | O  | 0.374874771  | 4.061719418  | 7.985930443  | O  | 0.372811615  | 4.034074783  | 8.038392067  |
| O  | 10.991579056 | 1.722723961  | 8.265545845  | O  | 10.970426559 | 1.721852779  | 8.242994308  | O  | 10.954042435 | 1.689931393  | 8.303243637  |
| O  | 9.426630020  | 0.058070675  | 3.055372953  | O  | 9.399049759  | 0.031415284  | 3.046617508  | O  | 9.436300278  | 0.026391357  | 3.156548262  |
| O  | 17.425367355 | 2.164959908  | 2.283581495  | O  | 17.402240753 | 2.123583555  | 2.270291805  | O  | 17.413085938 | 2.122594595  | 2.355656385  |
| O  | 12.452067375 | 0.270500004  | 0.203877434  | O  | 12.363956451 | 0.244234398  | 0.179282755  | O  | 12.387689590 | 0.240091801  | 0.278317690  |
| O  | 10.953782082 | 8.262387276  | 2.306238651  | O  | 10.942443848 | 8.241622925  | 2.300563574  | O  | 10.948354721 | 8.209370613  | 2.381399870  |
| O  | 9.405533791  | 2.862012863  | 0.160063848  | O  | 9.379707336  | 2.857728720  | 0.151828945  | O  | 9.427452087  | 2.835175514  | 0.233569905  |
| O  | 15.703131676 | 6.913168907  | 0.994032145  | O  | 15.659901619 | 6.879224300  | 0.969923913  | O  | 15.665854454 | 6.853440762  | 1.081079364  |
| O  | 17.529115677 | 8.707927704  | 6.323296070  | O  | 17.508419037 | 8.660363197  | 6.304626942  | O  | 17.482997894 | 8.616518974  | 6.354936123  |
| O  | 15.916377068 | 0.432899773  | 6.987681866  | O  | 15.906649590 | 0.408516586  | 6.983171463  | O  | 15.877760887 | 0.368932843  | 7.041743279  |
| O  | 17.526737213 | 5.888805389  | 9.069762230  | O  | 17.486829758 | 5.816699505  | 9.047403336  | O  | 17.477827072 | 5.795647144  | 9.081356049  |
| O  | 9.456135750  | 6.495129585  | 6.958541393  | O  | 9.449193954  | 6.493185043  | 6.958920002  | O  | 9.393088341  | 6.448383331  | 7.040678978  |
| O  | 14.490749359 | 8.405403137  | 9.102159500  | O  | 14.423955917 | 8.401376724  | 9.093179703  | O  | 14.422573090 | 8.385919571  | 9.172210693  |
| O  | 10.791511536 | 6.227820396  | 9.242594719  | O  | 10.711914063 | 6.222177029  | 9.283413887  | O  | 10.741539955 | 6.198544025  | 9.315542221  |
| O  | 8.706752777  | 1.934049368  | 6.866792679  | O  | 8.667437553  | 1.922430992  | 6.872034550  | O  | 8.649980545  | 1.881669044  | 6.952726841  |
| O  | 15.597061157 | 9.160241127  | 2.430206776  | O  | 15.564512253 | 9.125949860  | 2.411043406  | O  | 15.574899673 | 9.123870850  | 2.482866526  |



|   |              |              |              |   |              |              |              |   |              |              |              |
|---|--------------|--------------|--------------|---|--------------|--------------|--------------|---|--------------|--------------|--------------|
| O | 15.517469406 | 1.614620447  | 9.341858864  | O | 15.484915733 | 1.612857103  | 9.316273689  | O | 15.487759590 | 1.597960234  | 9.367609024  |
| O | 8.686884880  | 6.841413498  | 2.510853529  | O | 8.688081741  | 6.812399864  | 2.501472950  | O | 8.664664268  | 6.824737549  | 2.553855896  |
| O | 11.399897575 | -0.543026865 | 6.901663303  | O | 11.382432938 | -0.541455686 | 6.877219200  | O | 10.667411804 | 8.792171478  | 6.978607178  |
| O | 9.955462456  | 7.720686436  | 4.670441151  | O | 9.939681053  | 7.706472874  | 4.663827896  | O | 9.936866760  | 7.659338474  | 4.744895935  |
| O | 13.442399025 | 0.703460097  | 7.986910343  | O | 13.424689293 | 0.729801476  | 7.927635193  | O | 13.400886536 | 0.685023606  | 8.024623871  |
| O | 16.981618881 | 4.543733120  | 1.259101033  | O | 16.909696579 | 4.515202045  | 1.272196412  | O | 16.951194763 | 4.495398998  | 1.317321301  |
| O | 17.003566742 | 1.040981412  | 4.663185120  | O | 16.965522766 | 0.993028104  | 4.652854443  | O | 16.965694427 | 0.977756202  | 4.727652073  |
| O | 13.391619682 | 7.975537300  | 1.419220924  | O | 13.358862877 | 7.966012955  | 1.354302883  | O | 13.369242668 | 7.951583385  | 1.445741057  |
| O | 9.856308937  | 4.079753399  | 7.975487232  | O | 9.827634811  | 4.074377537  | 7.970126629  | O | 9.816245079  | 4.040112972  | 8.039938927  |
| O | 0.937848210  | 1.055398464  | 17.612043381 | O | 0.866781712  | 0.995148778  | 17.632263184 | O | 0.879034877  | 0.991691828  | 17.626968384 |
| O | -0.658139586 | -0.678140402 | 12.394019127 | O | -0.656563044 | -0.686474562 | 12.380579948 | O | -0.664616406 | -0.699464440 | 12.423409462 |
| O | 7.443952560  | 1.375063896  | 11.711623192 | O | 7.442986012  | 1.367920399  | 11.718592644 | O | 7.419145584  | 1.322426796  | 11.773230553 |
| O | 2.309608459  | -0.433319479 | 9.601346016  | O | 2.212682724  | -0.512181461 | 9.591215134  | O | 2.259338856  | -0.514006615 | 9.652029991  |
| O | 0.809434831  | 7.485631943  | 11.608587265 | O | 0.816964209  | 7.403994560  | 11.638901711 | O | 0.812279463  | 7.396999836  | 11.675289154 |
| O | -0.710789263 | 2.181097984  | 9.564067841  | O | -0.744140506 | 2.168951511  | 9.546491623  | O | -0.736877799 | 2.169985056  | 9.623703957  |
| O | 5.649565220  | 6.215636253  | 10.515083313 | O | 5.672448635  | 6.239252567  | 10.636471748 | O | 5.672977448  | 6.215983391  | 10.690925598 |
| O | 7.454431534  | 7.932198524  | 15.714583397 | O | 7.365422249  | 7.885042191  | 15.721282005 | O | 7.395217896  | 7.888098717  | 15.770208359 |
| O | 5.836177826  | -0.349853992 | 16.364995956 | O | 5.776291370  | -0.327557683 | 16.351528168 | O | 5.797415257  | -0.321605802 | 16.410621643 |
| O | 7.395828724  | 5.066689491  | 18.390804291 | O | 7.352088928  | 5.044281960  | 18.366882324 | O | 7.347075462  | 5.052885056  | 18.432949066 |
| O | -0.511892676 | 5.787531376  | 16.305450439 | O | -0.563282132 | 5.762127399  | 16.296079636 | O | -0.571909249 | 5.759380341  | 16.345891953 |
| O | 4.248576641  | 7.735223293  | 18.468709946 | O | 4.197830677  | 7.689682007  | 18.439998627 | O | 4.279972076  | 7.682699203  | 18.508451462 |
| O | 0.732349873  | 5.490308762  | 18.625715256 | O | 0.684044600  | 5.475796223  | 18.616199493 | O | 0.667200804  | 5.495517254  | 18.672367096 |
| O | -1.342753291 | 1.165614843  | 16.238801956 | O | 17.446550369 | 1.178145528  | 16.214523315 | O | 17.409524918 | 1.196942925  | 16.297948837 |
| O | 5.977203369  | -0.822371900 | 11.784839630 | O | 5.860245705  | -0.764092684 | 11.783612251 | O | 5.864640713  | -0.819433331 | 11.868150711 |
| O | 5.409366608  | 0.973569393  | 18.652898788 | O | 5.379929543  | 0.920568824  | 18.677902222 | O | 5.429352283  | 0.921329975  | 18.724143982 |
| O | 17.355175018 | 6.097359657  | 11.926532745 | O | 17.331909180 | 6.084905148  | 11.913471222 | O | 17.336744308 | 6.077773571  | 11.946578979 |
| O | 1.336025953  | -1.177672505 | 16.182703018 | O | 1.310934901  | -1.217753649 | 16.197172165 | O | 1.348408937  | -1.239880204 | 16.234937668 |
| O | -0.104697347 | 6.994368076  | 14.004107475 | O | -0.148787200 | 6.970149994  | 14.010246277 | O | -0.148383498 | 6.957435131  | 14.053049088 |
| O | 3.364582062  | 0.118454099  | 17.244163513 | O | 3.323363304  | 0.101579309  | 17.254081726 | O | 3.347019196  | 0.073175669  | 17.344379425 |
| O | 6.798563004  | 3.711437225  | 10.705823898 | O | 6.764170647  | 3.686147690  | 10.692111015 | O | 6.730102539  | 3.651984930  | 10.799439430 |
| O | 6.907404423  | 0.207057714  | 14.031888008 | O | 6.871466637  | 0.199048162  | 14.028709412 | O | 6.878292561  | 0.222294807  | 14.103117943 |
| O | 3.252856970  | 7.233474731  | 10.806902885 | O | 3.236226797  | 7.175576210  | 10.755702019 | O | 3.237653255  | 7.134181023  | 10.792968750 |
| O | -0.260613680 | 3.372075081  | 17.345539093 | O | -0.262143016 | 3.343894958  | 17.319955826 | O | -0.266928077 | 3.340749741  | 17.399522781 |
| O | 10.330949783 | 0.979724288  | 17.633716583 | O | 10.308284760 | 0.990114927  | 17.641839981 | O | 10.358942986 | 0.997207999  | 17.728910446 |
| O | 8.647223473  | -0.886816025 | 12.342274666 | O | 8.518899918  | -0.965467215 | 12.280551910 | O | 7.833128452  | 8.400433540  | 12.397465706 |
| O | 16.734693527 | 1.409973025  | 11.694054604 | O | 16.722507477 | 1.385152102  | 11.674829483 | O | 16.717264175 | 1.372921228  | 11.725225449 |
| O | 11.640223503 | -0.493952900 | 9.561103821  | O | 11.674490929 | -0.493665278 | 9.528038025  | O | 11.619813919 | -0.515167475 | 9.621929169  |
| O | 10.215366364 | 7.376232147  | 11.618525505 | O | 10.182744026 | 7.493932247  | 11.619027138 | O | 10.148071289 | 7.398311615  | 11.669163704 |
| O | 8.706032753  | 2.191946507  | 9.517410278  | O | 8.700824738  | 2.181438684  | 9.525165558  | O | 8.686138153  | 2.170931339  | 9.608305931  |
| O | 14.946399689 | 6.132522106  | 10.353596687 | O | 14.911359787 | 6.105518341  | 10.337171555 | O | 14.902132034 | 6.103819847  | 10.428685188 |
| O | 16.881916046 | 7.945836544  | 15.688050270 | O | 16.852792740 | 7.950242043  | 15.703355789 | O | 16.888238907 | 7.971003532  | 15.756950378 |
| O | 15.262911797 | -0.358988225 | 16.362239838 | O | 15.222979546 | -0.333030522 | 16.348392487 | O | 15.229317665 | -0.382087469 | 16.402263641 |
| O | 16.922504425 | 5.170948029  | 18.489652634 | O | 16.875644684 | 5.086067200  | 18.458887100 | O | 16.860893250 | 5.088375568  | 18.499027252 |
| O | 8.850886345  | 5.733107567  | 16.307359695 | O | 8.816860199  | 5.725186825  | 16.279806137 | O | 8.822841644  | 5.712826729  | 16.358970642 |

|    |              |              |              |    |              |              |              |    |              |              |              |
|----|--------------|--------------|--------------|----|--------------|--------------|--------------|----|--------------|--------------|--------------|
| O  | 13.749941826 | 7.710842133  | 18.503158569 | O  | 13.776153564 | 7.688759327  | 18.481904984 | O  | 13.787915230 | 7.646568298  | 18.551797867 |
| O  | 10.041608810 | 5.517462730  | 18.684032440 | O  | 9.992299080  | 5.487160683  | 18.663579941 | O  | 11.385361671 | 6.966403484  | 0.004142016  |
| O  | 8.052362442  | 1.183647394  | 16.243383408 | O  | 8.035202026  | 1.140875816  | 16.232826233 | O  | 8.083914757  | 1.123510480  | 16.311210632 |
| O  | 14.906874657 | 8.397232056  | 11.772540092 | O  | 14.912327766 | 8.360655785  | 11.741642952 | O  | 14.885023117 | 8.366868973  | 11.827071190 |
| O  | 14.867302895 | 0.932931423  | 18.652431488 | O  | 14.799607277 | 0.914684176  | 18.656394958 | O  | 14.859825134 | 0.870171666  | 18.720441818 |
| O  | 8.019326210  | 5.856978416  | 12.051115036 | O  | 8.125614166  | 5.787240505  | 11.996047974 | O  | 8.062471390  | 5.746394634  | 12.150414467 |
| O  | 10.749488831 | -1.278584361 | 16.294353485 | O  | 10.663652420 | -1.254596949 | 16.271190643 | O  | 10.675827026 | -1.276467562 | 16.383569717 |
| O  | 9.339155197  | 7.000987053  | 14.047266006 | O  | 9.270566940  | 7.043817520  | 14.028850555 | O  | 9.306200027  | 7.010887146  | 14.116186142 |
| O  | 12.792656898 | 0.031289220  | 17.295257568 | O  | 12.745710373 | -0.033121705 | 17.306339264 | O  | 12.774747849 | -0.049203753 | 17.395441055 |
| O  | 16.247678757 | 3.773352385  | 10.632802963 | O  | 16.218091965 | 3.747488499  | 10.648452759 | O  | 16.206825256 | 3.739667416  | 10.694705963 |
| O  | 16.313777924 | 0.248508215  | 14.033669472 | O  | 16.285932541 | 0.200313449  | 14.009300232 | O  | 16.302112579 | 0.214127302  | 14.076193810 |
| O  | 12.670065880 | 7.299818039  | 10.775102615 | O  | 12.639867783 | 7.260784149  | 10.777069092 | O  | 12.624206543 | 7.258323193  | 10.846737862 |
| O  | 9.174741745  | 3.328398705  | 17.402675629 | O  | 9.118256569  | 3.315485001  | 17.354490280 | O  | 9.118850708  | 3.310728073  | 17.418651581 |
| O  | 3.966917992  | 2.316223145  | 15.007949829 | O  | 3.236436844  | 2.464396954  | 15.107323647 | O  | 3.451525688  | 2.429963589  | 14.862750053 |
| O  | 4.588717461  | 4.445426464  | 13.899613380 | O  | 4.198298931  | 4.516227245  | 13.975444794 | O  | 3.840013266  | 4.721626759  | 13.797305107 |
| O  | 14.748835564 | 2.821615219  | 15.344594002 | Cu | 3.460776091  | 2.856710672  | 13.183977127 | Cu | 3.341139078  | 3.009348392  | 12.977107048 |
| Cu | 3.984358788  | 2.755017757  | 13.139677048 | Cu | 4.166997910  | 3.989632130  | 15.842043877 | Cu | 4.452998638  | 3.974565983  | 15.557523727 |
| Cu | 4.444670677  | 3.988030910  | 15.801182747 | H  | 15.022108078 | 6.142329216  | 0.894624949  | H  | 15.027941704 | 6.116863251  | 1.007752061  |
| H  | 15.077764511 | 6.181427956  | 0.825132906  | H  | 2.616444111  | 0.761920750  | 11.810546875 | H  | 2.636858940  | 0.885026574  | 11.504433632 |
| H  | 2.878077030  | 0.424337029  | 13.222229958 | H  | 4.109550476  | 0.410040021  | 12.401116371 | H  | 4.039515972  | 0.538554072  | 12.282845497 |
| H  | 2.922656536  | 0.849650204  | 11.640965462 | H  | 2.796611071  | 0.364787698  | 13.387845993 | H  | 2.621033192  | 0.557307363  | 13.108481407 |
| H  | 4.286948681  | 0.314891100  | 12.384074211 | H  | 3.606268644  | 4.501890182  | 11.254742622 | H  | 3.468362331  | 4.686695576  | 11.024450302 |
| H  | 3.673667908  | 4.559518814  | 11.393726349 | H  | 4.900244236  | 3.516510248  | 11.086779594 | H  | 4.715044498  | 3.634561539  | 10.874207497 |
| H  | 4.948539734  | 3.620036840  | 10.968084335 | H  | 3.415076971  | 3.030907631  | 10.546779633 | H  | 3.205630302  | 3.216514111  | 10.335633278 |
| H  | 3.403155327  | 3.148763657  | 10.578980446 | H  | 14.260477066 | 5.381643295  | 10.251948357 | H  | 14.252313614 | 5.379277706  | 10.339912415 |
| H  | 14.302666664 | 5.401803970  | 10.444836617 | H  | 3.925057650  | 4.206830978  | 18.448453903 | H  | 4.020316124  | 4.155283451  | 18.203413010 |
| H  | 3.987903118  | 4.244822025  | 18.364658356 | H  | 2.667843342  | 3.325773716  | 17.792539597 | H  | 2.939704657  | 3.147670746  | 17.439096451 |
| H  | 2.747603893  | 3.393312454  | 17.651891708 | H  | 4.136450291  | 2.629800081  | 18.050743103 | H  | 4.433329105  | 2.616700649  | 17.846063614 |
| H  | 4.183312893  | 2.658778191  | 17.987815857 | H  | 5.676753044  | 6.060548782  | 15.636673927 | H  | 5.685514450  | 6.259531975  | 15.569853783 |
| H  | 5.764085770  | 6.175646782  | 15.645839691 | H  | 4.714769363  | 6.235137939  | 16.949254990 | H  | 4.589216709  | 6.273692131  | 16.783405304 |
| H  | 4.750529289  | 6.275456429  | 16.929435730 | H  | 6.046881199  | 5.305201054  | 17.058759689 | H  | 5.992837906  | 5.465923786  | 16.975643158 |
| H  | 6.135784149  | 5.424337387  | 17.073112488 | H  | 5.053049088  | 4.795104980  | 13.603997231 | H  | 4.484957218  | 5.238198280  | 13.285243988 |
| H  | 5.454502583  | 4.734902859  | 13.558823586 | H  | 3.443289995  | 1.610990763  | 15.527559280 | H  | 3.875962257  | 1.580424428  | 15.071943283 |
| H  | 13.979005814 | 2.244091511  | 15.202795029 | H  | 1.338249207  | 4.671142578  | 13.308171272 | H  | 1.094788313  | 4.515533447  | 13.394546509 |
| H  | 3.565178871  | 1.570167780  | 15.483825684 | H  | 0.548673451  | 3.459720135  | 12.535553932 | H  | 0.308598936  | 3.287231445  | 12.634838104 |
| H  | 15.359213829 | 2.586005449  | 14.623626709 | H  | 0.940171003  | 3.313606739  | 14.122540474 | H  | 0.885004163  | 3.090602160  | 14.159233093 |
| N  | 3.448881149  | 0.901136577  | 12.519503593 | N  | 3.226744175  | 0.890626550  | 12.623148918 | H  | 6.509448051  | 2.625335455  | 14.070231438 |
| N  | 3.967810631  | 3.580670357  | 11.314290047 | N  | 3.887317181  | 3.518095255  | 11.312276840 | H  | 6.912182808  | 4.199429512  | 14.087010384 |
| N  | 3.762200356  | 3.532711983  | 17.649051666 | N  | 3.676158667  | 3.494407654  | 17.742296219 | H  | 7.319896698  | 3.232964516  | 15.338768005 |
| N  | 5.361213684  | 5.6333584023 | 16.412527084 | N  | 5.265789509  | 5.549440861  | 16.420173645 | N  | 3.148751497  | 1.041355848  | 12.378187180 |
| N  | 13.727743149 | 5.517484188  | 13.369861603 | N  | 1.282889128  | 3.652948856  | 13.220192909 | N  | 3.706025600  | 3.692235231  | 11.090278625 |
| N  | 13.511750221 | 5.947914124  | 14.373353958 |    |              |              |              | N  | 3.922951698  | 3.427805424  | 17.480314255 |
|    |              |              |              |    |              |              |              | N  | 5.253067017  | 5.674314976  | 16.285655975 |
|    |              |              |              |    |              |              |              | N  | 1.098042965  | 3.502712727  | 13.247474670 |

|                 |              |              | N 6.562563419 3.442371845 14.683748245 |              |              |
|-----------------|--------------|--------------|----------------------------------------|--------------|--------------|
| ts5             |              |              | Structure A                            |              |              |
| Si 0.092674077  | 2.443238974  | 8.288076401  | Si 0.062787652                         | 2.488001347  | 8.345581055  |
| Si 7.922149658  | 0.706389308  | 3.207546711  | Si 7.904357910                         | 0.665149331  | 3.259986162  |
| Si 2.398022175  | 8.198570251  | 0.980299294  | Si 2.393449068                         | 8.193976402  | 1.060106397  |
| Si 5.523376942  | 8.325926781  | 1.238930583  | Si 5.480361462                         | 8.289840698  | 1.301761866  |
| Si 7.859600544  | 0.657290280  | 6.327646732  | Si 7.845445633                         | 0.622872889  | 6.378610611  |
| Si 0.051336288  | 5.605600834  | 8.400504112  | Si 0.008716166                         | 5.645285606  | 8.477866173  |
| Si 0.127619952  | 7.916281223  | 6.278968811  | Si 0.099183977                         | 7.963845730  | 6.343591690  |
| Si 5.550834179  | 0.418547869  | 8.472402573  | Si 5.519732475                         | 0.438694954  | 8.529117584  |
| Si 2.421811104  | 0.339958906  | 8.248893738  | Si 2.402659893                         | 0.385964811  | 8.302776337  |
| Si 0.123156190  | 8.017143250  | 3.199718237  | Si 0.090992168                         | 8.029586792  | 3.257080078  |
| Si 7.927308559  | 3.013962269  | 1.049927354  | Si 7.942065239                         | 2.954846859  | 1.130996823  |
| Si 9.515876770  | 2.487674952  | 8.274030685  | Si 9.493626595                         | 2.459733963  | 8.312067986  |
| Si 17.397975922 | 0.736850381  | 3.216431856  | Si 17.347429276                        | 0.731312215  | 3.280567169  |
| Si 11.790156364 | 8.216218948  | 1.062097073  | Si 11.755349159                        | 8.166297913  | 1.134072661  |
| Si 14.891875267 | 8.404489517  | 1.267266154  | Si 14.869935036                        | 8.384332657  | 1.336425543  |
| Si 17.289239883 | 0.583748043  | 6.321117401  | Si 17.260391235                        | 0.630059958  | 6.387560844  |
| Si 9.473568916  | 5.630197525  | 8.485372543  | Si 9.481692314                         | 5.572020531  | 8.533293724  |
| Si 9.496741295  | 7.926910877  | 6.347669601  | Si 9.475055695                         | 7.891253471  | 6.418738842  |
| Si 14.958713531 | 0.428103566  | 8.423170090  | Si 14.938700676                        | 0.439409137  | 8.513181686  |
| Si 11.819630623 | 0.348475933  | 8.304536819  | Si 11.788895607                        | 0.310288310  | 8.387834549  |
| Si 9.511537552  | 7.992911339  | 3.257338762  | Si 9.501029015                         | 7.912405968  | 3.323530436  |
| Si 17.345785141 | 3.007602692  | 1.033086896  | Si 17.318237305                        | 3.007810831  | 1.083491921  |
| Si -0.583715439 | 1.749697804  | 17.629241943 | Si -0.598461330                        | 1.759216070  | 17.685394287 |
| Si 7.176504135  | -0.070585191 | 12.553318977 | Si 7.214650631                         | -0.120704710 | 12.618648529 |
| Si 1.674832702  | 7.380191803  | 10.356374741 | Si 1.670297146                         | 7.440359116  | 10.426955223 |
| Si 4.788566589  | 7.567880630  | 10.639564514 | Si 4.795577526                         | 7.525369167  | 10.652233124 |
| Si 7.201005936  | -0.044030190 | 15.702010155 | Si 7.185035706                         | -0.129016280 | 15.755331039 |
| Si -0.596585631 | 4.913640499  | 17.780757904 | Si -0.609851599                        | 4.920304775  | 17.840480804 |
| Si -0.549003541 | 7.207660675  | 15.656666756 | Si -0.558626115                        | 7.222426891  | 15.729928017 |
| Si 4.864687920  | -0.235906124 | 17.832666397 | Si 4.849269867                         | -0.309078574 | 17.889318466 |
| Si 1.741668463  | -0.363812804 | 17.600294113 | Si 1.752624273                         | -0.353188992 | 17.674568176 |
| Si -0.597113013 | 7.273500919  | 12.559950829 | Si -0.579921186                        | 7.315291405  | 12.626973152 |
| Si 7.230921268  | 2.224476814  | 10.429654121 | Si 7.205162525                         | 2.209357262  | 10.513438225 |
| Si 8.851428986  | 1.755967259  | 17.649139404 | Si 8.839946747                         | 1.696177721  | 17.711147308 |
| Si 16.676624298 | -0.024270773 | 12.575532913 | Si 16.642980576                        | -0.008229971 | 12.652489662 |
| Si 11.058732986 | 7.430991650  | 10.407912254 | Si 11.051852226                        | 7.387017250  | 10.464423180 |
| Si 14.151811600 | 7.642010689  | 10.648439407 | Si 14.143799782                        | 7.648802757  | 10.716362000 |
| Si 16.618064880 | -0.101257205 | 15.690223694 | Si 16.598596573                        | -0.086684227 | 15.758796692 |
| Si 8.840837479  | 4.912421227  | 17.858530045 | Si 8.792438507                         | 4.852350235  | 17.933084488 |
| Si 8.866517067  | 7.217937469  | 15.718034744 | Si 8.846116066                         | 7.150432110  | 15.771381378 |
| Si 14.305416107 | -0.287519336 | 17.803174973 | Si 14.290580750                        | -0.305965662 | 17.875734329 |
| Si 11.179194450 | -0.361166954 | 17.665798187 | Si 11.148553848                        | -0.418692946 | 17.727550507 |

|    |              |              |              |    |              |              |              |
|----|--------------|--------------|--------------|----|--------------|--------------|--------------|
| Si | 8.780017853  | 7.116415501  | 12.607361794 | Si | 8.792591095  | 7.094665527  | 12.677877426 |
| Si | 16.627431870 | 2.247542858  | 10.384926796 | Si | 16.598367691 | 2.267534971  | 10.469292641 |
| Al | 7.825393677  | 6.190150738  | 1.313519478  | Al | 7.805449963  | 6.130055904  | 1.372509956  |
| Al | 17.378383636 | 6.148199558  | 1.250198960  | Al | 17.366275787 | 6.145402431  | 1.301281929  |
| Al | 7.145319462  | 5.375916481  | 10.709496498 | Al | 7.109139442  | 5.334207058  | 10.743041992 |
| Al | 16.639408112 | 5.396875381  | 10.581495285 | Al | 16.632236481 | 5.403980732  | 10.649191856 |
| O  | 1.548555732  | 1.709197998  | 8.443209648  | O  | 1.526297569  | 1.756560564  | 8.498025894  |
| O  | 0.022259444  | 0.060182452  | 3.159711838  | O  | -0.022920027 | 0.065180689  | 3.220705032  |
| O  | 8.022150993  | 2.096992970  | 2.383929014  | O  | 8.085476875  | 2.076284647  | 2.490386248  |
| O  | 2.875792980  | 0.232911557  | 0.208103240  | O  | 2.951462030  | 0.241259620  | 0.288322270  |
| O  | 1.461586595  | 8.173759460  | 2.297864914  | O  | 1.425024271  | 8.209568024  | 2.355160236  |
| O  | -0.045027770 | 2.937642097  | 0.264880657  | O  | -0.068736151 | 2.951708555  | 0.319545776  |
| O  | 6.294666290  | 6.956929684  | 0.998962283  | O  | 6.288613796  | 6.936541557  | 1.121107578  |
| O  | 8.053229332  | 8.688079834  | 6.463784695  | O  | 8.026374817  | 8.646127701  | 6.524394989  |
| O  | 6.450486660  | 0.424440503  | 7.125575066  | O  | 6.439948082  | 0.438724279  | 7.198836803  |
| O  | 8.123291969  | 5.765722275  | 9.327317238  | O  | 8.135063171  | 5.639910221  | 9.381814957  |
| O  | 0.113125503  | 6.469089508  | 7.019404411  | O  | 0.094209015  | 6.535067558  | 7.119327068  |
| O  | 4.947702408  | 8.369419098  | 9.220874786  | O  | 4.888851166  | 8.384223938  | 9.260931969  |
| O  | 1.264496088  | 6.130641460  | 9.394938469  | O  | 1.176007867  | 6.171448708  | 9.530690193  |
| O  | 18.093221664 | 1.817175865  | 7.035623074  | O  | 18.073680878 | 1.874083519  | 7.080766201  |
| O  | 6.079005241  | 9.178920746  | 2.515785456  | O  | 6.716623783  | -0.173386633 | 2.527254581  |
| O  | 6.047424793  | 1.564057708  | 9.509658813  | O  | 5.993186474  | 1.568361878  | 9.605660439  |
| O  | 18.000165939 | 6.851620674  | 2.676028013  | O  | 17.990669250 | 6.849648952  | 2.725703001  |
| O  | 1.925085068  | -0.483704388 | 6.950272560  | O  | 1.903815389  | -0.434426606 | 7.001310825  |
| O  | 0.563502073  | 7.710106850  | 4.738864899  | O  | 0.521065950  | 7.728816032  | 4.803347111  |
| O  | 3.988112211  | 0.742031336  | 8.097841263  | O  | 3.965786934  | 0.799546599  | 8.145747185  |
| O  | 7.556887627  | 4.499518394  | 1.416295409  | O  | 7.528587818  | 4.437982082  | 1.466683865  |
| O  | 7.517448902  | 0.981969833  | 4.769423485  | O  | 7.485420227  | 0.919118583  | 4.822362423  |
| O  | 3.931730986  | 8.056652069  | 1.459013224  | O  | 3.902847052  | 7.988768101  | 1.588823557  |
| O  | 0.353059411  | 4.030331135  | 8.053055763  | O  | 0.356957793  | 4.077155113  | 8.133161545  |
| O  | 10.958853722 | 1.722231627  | 8.410418510  | O  | 10.916325569 | 1.674154520  | 8.491912842  |
| O  | 9.394384384  | 0.019198090  | 3.168912649  | O  | 9.337552071  | -0.092976391 | 3.211038351  |
| O  | 17.426761627 | 2.141820908  | 2.414849281  | O  | 17.375583649 | 2.119210720  | 2.452460766  |
| O  | 12.366312027 | 0.262654841  | 0.302325428  | O  | 12.299944878 | 0.204812974  | 0.360675693  |
| O  | 10.894424438 | 8.205072403  | 2.389812708  | O  | 10.896884918 | 8.162428856  | 2.487365484  |
| O  | 9.366935730  | 2.892827988  | 0.239784583  | O  | 9.380914688  | 2.847896576  | 0.319146454  |
| O  | 15.631031036 | 6.871645927  | 1.106727481  | O  | 15.618841171 | 6.860562325  | 1.150111198  |
| O  | 17.491569519 | 8.615682602  | 6.405500412  | O  | 17.461502075 | 8.659483910  | 6.476651669  |
| O  | 15.866005898 | 0.324849188  | 7.080271244  | O  | 15.849179268 | 0.381774664  | 7.170710564  |
| O  | 17.467826843 | 5.792974472  | 9.123995781  | O  | 17.401119232 | 5.785383224  | 9.156559944  |
| O  | 9.413784027  | 6.489364147  | 7.097070694  | O  | 9.379164696  | 6.457493782  | 7.167256355  |
| O  | 14.399377823 | 8.403333664  | 9.248293877  | O  | 14.411875725 | 8.400829315  | 9.314313889  |
| O  | 10.753302574 | 6.216537476  | 9.372056961  | O  | 10.753680229 | 6.177575588  | 9.420546532  |
| O  | 8.677800179  | 1.910820961  | 6.994006634  | O  | 8.684231758  | 1.876819611  | 7.017032623  |

|   |              |              |              |   |              |              |              |
|---|--------------|--------------|--------------|---|--------------|--------------|--------------|
| O | 15.593361855 | 9.141472816  | 2.509391069  | O | 15.542992592 | 9.111302376  | 2.602317572  |
| O | 15.511801720 | 1.610540390  | 9.381879807  | O | 15.466710091 | 1.625966311  | 9.481356621  |
| O | 8.647593498  | 6.776566505  | 2.713736534  | O | 8.698725700  | 6.660965919  | 2.761269808  |
| O | 11.339835167 | -0.543356419 | 7.044828415  | O | 10.626194000 | 8.806616783  | 7.132326126  |
| O | 9.948025703  | 7.726581573  | 4.807545662  | O | 9.934947968  | 7.692188740  | 4.883290768  |
| O | 13.400747299 | 0.712988913  | 8.077539444  | O | 13.370738983 | 0.683208466  | 8.179618835  |
| O | 16.899425507 | 4.505011559  | 1.363749623  | O | 16.885728836 | 4.503923416  | 1.440737009  |
| O | 16.960317612 | 0.969771147  | 4.770473957  | O | 16.913040161 | 0.993800640  | 4.834878922  |
| O | 13.353630066 | 8.017324448  | 1.529229403  | O | 13.330970764 | 7.984356403  | 1.571419835  |
| O | 9.814126968  | 4.074120522  | 8.092780113  | O | 9.846035004  | 4.030799389  | 8.105545998  |
| O | 0.860886574  | 1.000380158  | 17.711269379 | O | 0.839610457  | 0.991482258  | 17.777023315 |
| O | -0.677088797 | -0.670958638 | 12.501336098 | O | -0.720451593 | -0.674926400 | 12.571162224 |
| O | 7.409839630  | 1.346232533  | 11.804912567 | O | 7.411533356  | 1.294117928  | 11.855890274 |
| O | 2.189311504  | -0.573377609 | 9.593417168  | O | 2.202559948  | -0.537291050 | 9.638712883  |
| O | 0.777363718  | 7.433203697  | 11.703974724 | O | 0.816927791  | 7.566390038  | 11.809601784 |
| O | -0.726230085 | 2.188136339  | 9.684372902  | O | -0.775485456 | 2.232262135  | 9.726887703  |
| O | 5.620834351  | 6.220472813  | 10.679704666 | O | 5.589262009  | 6.158610821  | 10.561838150 |
| O | 7.400169373  | 7.974071980  | 15.844092369 | O | 7.363609314  | 7.871572495  | 15.859002113 |
| O | 5.778454304  | -0.279832602 | 16.463647842 | O | 5.769753456  | -0.364932775 | 16.526836395 |
| O | 7.442889214  | 5.057085037  | 18.615839005 | O | 7.364951134  | 4.995116234  | 18.633602142 |
| O | -0.601939976 | 5.753002167  | 16.372358322 | O | -0.611351669 | 5.761419296  | 16.430587769 |
| O | 4.312677383  | 7.724873543  | 18.576070786 | O | 4.177014828  | 7.626693249  | 18.591548920 |
| O | 0.650053382  | 5.479296684  | 18.694341660 | O | 2.009108067  | 6.979711056  | 0.024574205  |
| O | 17.406646729 | 1.170002580  | 16.346574783 | O | 17.385810852 | 1.184988022  | 16.407264709 |
| O | 5.868091583  | -0.817574143 | 11.899833679 | O | 5.982715130  | -0.938703358 | 11.923905373 |
| O | 6.747320175  | 2.456291199  | 0.041938826  | O | 6.793066025  | 2.317112446  | 0.139438123  |
| O | 17.310369492 | 6.104959965  | 11.993322372 | O | 17.415681839 | 6.105160713  | 12.006479263 |
| O | 1.298260331  | -1.229341388 | 16.288124084 | O | 1.297186732  | -1.230408788 | 16.372274399 |
| O | -0.157370210 | 6.973182678  | 14.097828865 | O | -0.163268864 | 6.998690605  | 14.167121887 |
| O | 3.311468124  | 0.030728698  | 17.423248291 | O | 3.316215515  | 0.080674529  | 17.448719025 |
| O | 6.730240822  | 3.684698343  | 10.841099739 | O | 6.709825516  | 3.650521994  | 10.995944023 |
| O | 6.862586975  | 0.251707077  | 14.133939743 | O | 6.837810040  | 0.187307596  | 14.188613892 |
| O | 3.205436468  | 7.195729733  | 10.855579376 | O | 3.201747417  | 7.196983337  | 10.901348114 |
| O | -0.298443437 | 3.339515209  | 17.414875031 | O | -0.311242819 | 3.347859621  | 17.477350235 |
| O | 10.297505379 | 1.001437545  | 17.739986420 | O | 10.299122810 | 0.963809013  | 17.798362732 |
| O | 8.521178246  | -0.954566598 | 12.428144455 | O | 8.620874405  | -0.915879667 | 12.561883926 |
| O | 16.687709808 | 1.374693155  | 11.765061378 | O | 16.677022934 | 1.383712292  | 11.838445663 |
| O | 11.644643784 | -0.501308799 | 9.695552826  | O | 11.600119591 | -0.536561012 | 9.777459145  |
| O | 10.121909142 | 7.383249760  | 11.719717026 | O | 10.143995285 | 7.307928085  | 11.793705940 |
| O | 8.657678604  | 2.202010155  | 9.634700775  | O | 8.594793320  | 2.220791578  | 9.658160210  |
| O | 14.887053490 | 6.103578568  | 10.467456818 | O | 14.890156746 | 6.114633083  | 10.575103760 |
| O | 16.834838867 | 7.941482544  | 15.792005539 | O | 16.830898285 | 7.965075970  | 15.853729248 |
| O | 15.197727203 | -0.359980583 | 16.448705673 | O | 15.192747116 | -0.374175847 | 16.530324936 |
| O | 16.841892242 | 5.082013607  | 18.540416718 | O | 16.821086884 | 5.087303162  | 18.590785980 |

|    |              |              |              |    |              |              |              |
|----|--------------|--------------|--------------|----|--------------|--------------|--------------|
| O  | 8.769054413  | 5.760876656  | 16.442134857 | O  | 8.762115479  | 5.704441071  | 16.515838623 |
| O  | 13.750613213 | 7.668427467  | 18.587825775 | O  | 13.761410713 | 7.661030769  | 18.671712875 |
| O  | 11.464014053 | 6.994421959  | 0.021800289  | O  | 11.401996613 | 6.930263042  | 0.119536616  |
| O  | 8.024350166  | 1.228838921  | 16.315370560 | O  | 8.023675919  | 1.125329614  | 16.389213562 |
| O  | 14.888858795 | 8.351646423  | 11.892377853 | O  | 14.849636078 | 8.370195389  | 11.969321251 |
| O  | 16.199825287 | 2.363811970  | 0.058395058  | O  | 16.165740967 | 2.379336834  | 0.101538517  |
| O  | 7.986401081  | 5.781263828  | 12.209441185 | O  | 7.912887096  | 5.830381870  | 12.235190392 |
| O  | 10.700778961 | -1.253025293 | 16.395324707 | O  | 10.659942627 | -1.293318987 | 16.445589066 |
| O  | 9.252119064  | 7.006239891  | 14.167435646 | O  | 9.262313843  | 6.892387867  | 14.231850624 |
| O  | 12.749572754 | 0.004346609  | 17.434333801 | O  | 12.725867271 | -0.078077197 | 17.510068893 |
| O  | 16.200166702 | 3.746021271  | 10.737154961 | O  | 16.173009872 | 3.762680531  | 10.845801353 |
| O  | 16.266952515 | 0.227283239  | 14.127977371 | O  | 16.223566055 | 0.243182540  | 14.201877594 |
| O  | 12.616642952 | 7.261251450  | 10.937559128 | O  | 12.613851547 | 7.238230228  | 10.979442596 |
| O  | 9.138857841  | 3.350231171  | 17.444812775 | O  | 9.103116989  | 3.295286655  | 17.503252029 |
| O  | 3.360630512  | 1.856170416  | 14.692348480 | O  | 1.777390957  | 2.318921089  | 14.088196754 |
| O  | 3.779129982  | 4.389168262  | 13.870284081 | O  | 4.556569099  | 3.454470158  | 13.394040108 |
| Cu | 3.277640820  | 2.721256733  | 12.964651108 | Cu | 2.677429914  | 2.846337318  | 12.454368591 |
| Cu | 4.926688194  | 4.315089226  | 15.435473442 | Cu | 5.137386799  | 4.044002533  | 15.082732201 |
| H  | 14.987795830 | 6.140803337  | 1.024574161  | H  | 14.981025696 | 6.121601105  | 1.105644584  |
| H  | 2.574284077  | 0.778698683  | 11.265543938 | H  | 2.727821827  | 0.218674779  | 12.253082275 |
| H  | 3.913603783  | 0.343982041  | 12.126559258 | H  | 4.055840492  | 0.802155495  | 11.466639519 |
| H  | 2.446578979  | 0.403378010  | 12.862707138 | H  | 3.981712341  | 0.881324649  | 13.103547096 |
| H  | 3.388665438  | 4.568046570  | 11.073401451 | H  | 3.417993069  | 4.509672165  | 10.564827919 |
| H  | 4.722359657  | 3.625264645  | 10.968785286 | H  | 4.349170685  | 3.181472301  | 10.433148384 |
| H  | 3.294237852  | 3.118529558  | 10.321811676 | H  | 2.825994015  | 3.168472290  | 9.808106422  |
| H  | 14.239446640 | 5.379302025  | 10.363499641 | H  | 14.245891571 | 5.382223606  | 10.515015602 |
| H  | 2.832025051  | 4.095561504  | 17.050146103 | H  | 2.992787600  | 3.855490685  | 16.606418610 |
| H  | 3.303471088  | 2.732440472  | 16.131874084 | H  | 2.853926659  | 2.806046724  | 15.304514885 |
| H  | 4.055290222  | 3.148234606  | 17.602636337 | H  | 3.801737309  | 2.447566986  | 16.634788513 |
| H  | 6.054082394  | 6.498834610  | 16.134298325 | H  | 5.870811939  | 6.291631699  | 16.103712082 |
| H  | 4.787674904  | 6.195238113  | 17.128379822 | H  | 4.584180355  | 5.781249046  | 16.969776154 |
| H  | 6.214873791  | 5.446644306  | 17.377424240 | H  | 6.065061569  | 5.171180725  | 17.267433167 |
| H  | 4.109513760  | 5.053655624  | 13.241319656 | H  | 5.261848450  | 3.557558537  | 12.726560593 |
| H  | 3.861404419  | 1.024471164  | 14.740251541 | H  | 1.423112750  | 1.415213704  | 14.117414474 |
| H  | 0.930503428  | 4.186769485  | 13.413660049 | H  | 2.096892118  | 5.383769035  | 12.846555710 |
| H  | 0.336224377  | 3.123414516  | 12.308079720 | H  | 0.853407502  | 4.739593506  | 11.976714134 |
| H  | 0.647339582  | 2.636290073  | 13.843120575 | H  | 1.066279650  | 4.271606922  | 13.548661232 |
| H  | 6.513153553  | 3.019134998  | 13.889140129 | H  | 7.274782181  | 3.017839193  | 14.146211624 |
| H  | 7.057615280  | 4.561184883  | 13.820543289 | H  | 7.312821388  | 4.600936890  | 13.694919586 |
| H  | 7.426541328  | 3.611109257  | 15.114291191 | H  | 7.786073685  | 4.170490265  | 15.212389946 |
| N  | 3.036504745  | 0.873185396  | 12.172863007 | N  | 3.423493862  | 0.967912376  | 12.250971794 |
| N  | 3.702230215  | 3.594930172  | 11.129523277 | N  | 3.385302544  | 3.487119436  | 10.605302811 |
| N  | 3.624996185  | 3.524674892  | 16.753118515 | N  | 3.529016972  | 3.216273308  | 16.014595032 |
| N  | 5.563373089  | 5.749633789  | 16.630516052 | N  | 5.430476189  | 5.452748299  | 16.496908188 |

|   |             |             |              |   |             |             |              |
|---|-------------|-------------|--------------|---|-------------|-------------|--------------|
| N | 0.997485638 | 3.221643448 | 13.081256866 | N | 1.557324409 | 4.531137466 | 12.686299324 |
| N | 6.672725677 | 3.852992535 | 14.463729858 | N | 7.095664501 | 3.967529297 | 14.483567238 |

**Table S7.** Cartesian coordinates of RC, TS, IM, and PC for cycle III. The structures from A to F are the same as those in Table S5.

| Structure G <sub>3</sub> |              |              |              | Structure H <sub>3</sub> |              |              |              | ts3 |              |              |              |
|--------------------------|--------------|--------------|--------------|--------------------------|--------------|--------------|--------------|-----|--------------|--------------|--------------|
| Si                       | 0.123453081  | 2.551858425  | 8.111183167  | Si                       | 0.177241921  | 2.514806032  | 8.104107857  | Si  | 0.160102844  | 2.532066584  | 8.098523140  |
| Si                       | 7.967732430  | 0.764650047  | 3.051858425  | Si                       | 8.002029419  | 0.746678829  | 3.012587547  | Si  | 7.996063232  | 0.738525391  | 3.026687622  |
| Si                       | 2.426109314  | 8.263879776  | 0.842182159  | Si                       | 2.468835115  | 8.224849701  | 0.838591516  | Si  | 2.457997084  | 8.213848114  | 0.842463017  |
| Si                       | 5.543925285  | 8.379703522  | 1.100468755  | Si                       | 5.585228920  | 8.351881981  | 1.071654797  | Si  | 5.569439411  | 8.350424767  | 1.122260571  |
| Si                       | 7.906554222  | 0.712535620  | 6.172687054  | Si                       | 7.961997509  | 0.719059110  | 6.155089378  | Si  | 7.966343880  | 0.706351399  | 6.166296482  |
| Si                       | 0.086347997  | 5.721328735  | 8.247645378  | Si                       | 0.145122111  | 5.674674511  | 8.231168747  | Si  | 0.132212400  | 5.686505795  | 8.238596916  |
| Si                       | 0.166939735  | 8.011688232  | 6.134830475  | Si                       | 0.206307024  | 7.979840279  | 6.131366730  | Si  | 0.202882320  | 7.985532761  | 6.124999046  |
| Si                       | 5.599462032  | 0.494137943  | 8.297962189  | Si                       | 5.642168045  | 0.493661046  | 8.278084755  | Si  | 5.624126911  | 0.517491639  | 8.266117096  |
| Si                       | 2.463080168  | 0.447828472  | 8.103330612  | Si                       | 2.514201641  | 0.410481870  | 8.080696106  | Si  | 2.501889706  | 0.422937095  | 8.067117691  |
| Si                       | 0.142084837  | 8.078055382  | 3.052813053  | Si                       | 0.175567731  | 8.038078308  | 3.020790577  | Si  | 0.167017221  | 8.029564857  | 3.025006533  |
| Si                       | 7.984808922  | 3.053752899  | 0.895925820  | Si                       | 8.042730331  | 3.019817114  | 0.866111934  | Si  | 8.016327858  | 3.022387981  | 0.871402740  |
| Si                       | 9.563755035  | 2.555931091  | 8.108778000  | Si                       | 9.606044769  | 2.544958115  | 8.084616661  | Si  | 9.621704102  | 2.523897409  | 8.108431816  |
| Si                       | 17.396528244 | 0.780701101  | 3.042559385  | Si                       | 17.445590973 | 0.753614426  | 3.012705564  | Si  | 17.440536499 | 0.753061652  | 3.017544746  |
| Si                       | 11.800999641 | 8.259466171  | 0.882205665  | Si                       | 11.824940681 | 8.254827499  | 0.851670206  | Si  | 11.831986427 | 8.218605995  | 0.852357507  |
| Si                       | 14.912207603 | 8.452354431  | 1.085201025  | Si                       | 14.943882942 | 8.425400734  | 1.059517741  | Si  | 14.944368362 | 8.420000076  | 1.068040967  |
| Si                       | 17.329513550 | 0.698024392  | 6.156201363  | Si                       | 17.377920151 | 0.654309928  | 6.153488159  | Si  | 17.368200302 | 0.666862130  | 6.148520470  |
| Si                       | 9.499400139  | 5.696785927  | 8.312355042  | Si                       | 9.550491333  | 5.690045834  | 8.277235031  | Si  | 9.572996140  | 5.681411743  | 8.276158333  |
| Si                       | 9.546391487  | 7.991321087  | 6.171287537  | Si                       | 9.592739105  | 7.985008717  | 6.155695438  | Si  | 9.579841614  | 7.982595444  | 6.170449734  |
| Si                       | 15.002559662 | 0.519597292  | 8.265663147  | Si                       | 15.056890488 | 0.515261412  | 8.244553566  | Si  | 15.061734200 | 0.488111377  | 8.252871513  |
| Si                       | 11.867694855 | 0.428871453  | 8.094962120  | Si                       | 11.915354729 | 0.411994278  | 8.088548660  | Si  | 11.916623116 | 0.403539181  | 8.117074013  |
| Si                       | 9.569233894  | 8.050765038  | 3.067092657  | Si                       | 9.598686218  | 8.006521225  | 3.029397726  | Si  | 9.597142220  | 8.002154350  | 3.047344208  |
| Si                       | 17.360994339 | 3.072592258  | 0.866120636  | Si                       | 17.415203094 | 3.037233353  | 0.856540501  | Si  | 17.388607025 | 3.035037279  | 0.852311254  |
| Si                       | -0.550966859 | 1.824732304  | 17.471601486 | Si                       | -0.501120567 | 1.800375223  | 17.476198196 | Si  | -0.511272371 | 1.796177030  | 17.478235245 |
| Si                       | 7.231354237  | 0.028194308  | 12.375006676 | Si                       | 7.288428307  | 0.022102594  | 12.347828865 | Si  | 7.285436630  | -0.006444037 | 12.356319427 |
| Si                       | 1.721456766  | 7.514912128  | 10.199491501 | Si                       | 1.778851032  | 7.471978188  | 10.185462952 | Si  | 1.767619371  | 7.490539074  | 10.183023453 |
| Si                       | 4.836488724  | 7.668545246  | 10.462121964 | Si                       | 4.897340775  | 7.658051491  | 10.419574738 | Si  | 4.885972023  | 7.627461433  | 10.373682022 |
| Si                       | 7.232455730  | -0.036310673 | 15.529719353 | Si                       | 7.269396782  | -0.032752991 | 15.517605782 | Si  | 7.245082855  | -0.081964254 | 15.514797211 |
| Si                       | -0.545034766 | 4.985081673  | 17.622400284 | Si                       | -0.520388186 | 4.966518879  | 17.615516663 | Si  | -0.527912855 | 4.952273846  | 17.606952667 |
| Si                       | -0.521057963 | 7.285541534  | 15.507168770 | Si                       | -0.478702128 | 7.258184433  | 15.495958328 | Si  | -0.486664534 | 7.248373508  | 15.491283417 |
| Si                       | 4.907711506  | -0.213830352 | 17.668262482 | Si                       | 4.951847076  | -0.277975082 | 17.636957169 | Si  | 4.931371212  | -0.264915228 | 17.656139374 |
| Si                       | 1.772494197  | -0.293378830 | 17.473367691 | Si                       | 1.814063191  | -0.321928501 | 17.488193512 | Si  | 1.795574784  | -0.334222078 | 17.490596771 |
| Si                       | -0.551558971 | 7.355919838  | 12.397030830 | Si                       | -0.480968177 | 7.335830212  | 12.391600609 | Si  | -0.484657347 | 7.331267357  | 12.398406029 |
| Si                       | 7.291827679  | 2.321026802  | 10.265928268 | Si                       | 7.331803799  | 2.305595875  | 10.248451233 | Si  | 7.331534863  | 2.289466858  | 10.250739098 |
| Si                       | 8.875808716  | 1.788234472  | 17.480844498 | Si                       | 8.916183472  | 1.788286805  | 17.445335388 | Si  | 8.897630692  | 1.752494097  | 17.442815781 |
| Si                       | 16.712305069 | 0.046801090  | 12.398929596 | Si                       | 16.767475128 | 0.027708113  | 12.390089989 | Si  | 16.763986588 | 0.031308651  | 12.403696060 |
| Si                       | 11.095910072 | 7.526996613  | 10.231547356 | Si                       | 11.156374931 | 7.510150433  | 10.206433296 | Si  | 11.161891937 | 7.487190247  | 10.214297295 |
| Si                       | 14.197494507 | 7.719558716  | 10.468673706 | Si                       | 14.265302658 | 7.711928844  | 10.454962730 | Si  | 14.265552521 | 7.699479103  | 10.467160225 |

|    |              |              |              |    |              |              |              |    |              |              |              |
|----|--------------|--------------|--------------|----|--------------|--------------|--------------|----|--------------|--------------|--------------|
| Si | 16.654642105 | -0.019381046 | 15.528623581 | Si | 16.705886841 | -0.039411783 | 15.512459755 | Si | 16.693073273 | -0.048267961 | 15.513179779 |
| Si | 8.789159775  | 4.955136299  | 17.639379501 | Si | 8.812446594  | 4.944681644  | 17.608234406 | Si | 8.833670616  | 4.908627033  | 17.629997253 |
| Si | 8.872405052  | 7.253904343  | 15.525839806 | Si | 8.926251411  | 7.247819901  | 15.513798714 | Si | 8.901662827  | 7.206863880  | 15.509549141 |
| Si | 14.324600220 | -0.211690664 | 17.637491226 | Si | 14.382701874 | -0.264352322 | 17.615587234 | Si | 14.365444183 | -0.274117947 | 17.613063812 |
| Si | 11.194895744 | -0.319970846 | 17.488788605 | Si | 11.241753578 | -0.338852406 | 17.463960648 | Si | 11.225608826 | -0.372572660 | 17.455303192 |
| Si | 8.850977898  | 7.226494789  | 12.405306816 | Si | 8.907485008  | 7.220188618  | 12.377635002 | Si | 8.885468483  | 7.219710350  | 12.385290146 |
| Si | 16.660232544 | 2.333043814  | 10.223222733 | Si | 16.722368240 | 2.314937592  | 10.210435867 | Si | 16.714923859 | 2.313047409  | 10.218982697 |
| Al | 7.868486404  | 6.242813110  | 1.085924506  | Al | 7.908563614  | 6.199452400  | 1.064178467  | Al | 7.916794777  | 6.195985794  | 1.115226865  |
| Al | 17.425664902 | 6.207215786  | 1.098917603  | Al | 17.445194244 | 6.177782536  | 1.070824385  | Al | 17.437282562 | 6.161940098  | 1.068781376  |
| Al | 7.189087868  | 5.461379051  | 10.506150246 | Al | 7.247276783  | 5.449582100  | 10.467441559 | Al | 7.220732689  | 5.451813698  | 10.430738449 |
| Al | 16.691558838 | 5.475813389  | 10.443247795 | Al | 16.760744095 | 5.447362900  | 10.432477951 | Al | 16.749670029 | 5.437986374  | 10.439112663 |
| O  | 1.578349233  | 1.812860489  | 8.237711906  | O  | 1.623983145  | 1.766747236  | 8.224165916  | O  | 1.601056099  | 1.772341847  | 8.206293106  |
| O  | 0.021645918  | 0.104435787  | 2.960823536  | O  | 0.059705630  | 0.063369110  | 2.869813681  | O  | 0.055157915  | 0.059386179  | 2.890532255  |
| O  | 8.053741455  | 2.169305325  | 2.248001099  | O  | 8.128029823  | 2.165022612  | 2.238450766  | O  | 8.105597496  | 2.143519878  | 2.226806164  |
| O  | 2.945804596  | 0.316986531  | 0.087514758  | O  | 2.964578629  | 0.279311955  | 0.093322605  | O  | 2.973527908  | 0.273524731  | 0.104216374  |
| O  | 1.477877140  | 8.241568565  | 2.140623093  | O  | 1.544300199  | 8.176791191  | 2.154463768  | O  | 1.532148838  | 8.176759720  | 2.155996561  |
| O  | -0.021210913 | 3.018578291  | 0.100832745  | O  | 0.041392043  | 2.989836454  | 0.110886894  | O  | 0.015163763  | 3.005443335  | 0.107332610  |
| O  | 6.286009789  | 6.981593132  | 0.887641132  | O  | 6.329580307  | 6.950034142  | 0.927581847  | O  | 6.350207329  | 6.970888615  | 0.939860106  |
| O  | 8.092825890  | 8.736882210  | 6.301512718  | O  | 8.155307770  | 8.753131866  | 6.332117558  | O  | 8.119555473  | 8.711375237  | 6.328605175  |
| O  | 6.478250504  | 0.498177469  | 6.935673714  | O  | 6.531237602  | 0.531529427  | 6.923170567  | O  | 6.525316238  | 0.551662743  | 6.919128418  |
| O  | 8.102745056  | 5.831633568  | 9.066297531  | O  | 8.156789780  | 5.834102154  | 9.034842491  | O  | 8.196292877  | 5.848418236  | 9.052554131  |
| O  | 0.101691008  | 6.552257538  | 6.842149734  | O  | 0.175010502  | 6.517233849  | 6.833349705  | O  | 0.149987876  | 6.534845352  | 6.845480442  |
| O  | 4.991161823  | 8.434436798  | 9.021662712  | O  | 5.031284809  | 8.416704178  | 8.976316452  | O  | 5.008608818  | 8.447648048  | 8.964708328  |
| O  | 1.306943655  | 6.304705620  | 9.196140289  | O  | 1.350229740  | 6.248170853  | 9.207296371  | O  | 1.338659048  | 6.259281158  | 9.211505890  |
| O  | 18.126968384 | 1.954493761  | 6.836158276  | O  | -0.676969886 | 1.910438180  | 6.844198704  | O  | 18.139272690 | 1.929781914  | 6.842410088  |
| O  | 6.799195766  | -0.142083943 | 2.347460985  | O  | 6.803947926  | -0.101938114 | 2.287876368  | O  | 6.774230480  | -0.122870699 | 2.354961157  |
| O  | 6.126739979  | 1.610237122  | 9.347691536  | O  | 6.146633148  | 1.600893855  | 9.350380898  | O  | 6.138260841  | 1.615565419  | 9.342021942  |
| O  | 18.051980972 | 6.881637096  | 2.538097858  | O  | 18.094190598 | 6.833717823  | 2.509053707  | O  | 18.089508057 | 6.829823971  | 2.499218464  |
| O  | 1.987524748  | -0.438752741 | 6.835137367  | O  | 2.040768147  | -0.469244033 | 6.806823730  | O  | 2.043359995  | -0.462800264 | 6.790728569  |
| O  | 0.609093904  | 7.824488163  | 4.589729309  | O  | 0.596026003  | 7.809369087  | 4.572982788  | O  | 0.594288230  | 7.778974533  | 4.571238041  |
| O  | 4.032511234  | 0.841979802  | 7.953307629  | O  | 4.076882362  | 0.823443830  | 7.919940472  | O  | 4.061137676  | 0.856060863  | 7.906440735  |
| O  | 7.580556393  | 4.547219753  | 1.213091373  | O  | 7.578627586  | 4.504695892  | 1.147276044  | O  | 7.577087402  | 4.507686138  | 1.184829712  |
| O  | 7.575898647  | 1.035840988  | 4.607499599  | O  | 7.635677338  | 0.993537843  | 4.581503868  | O  | 7.657508850  | 1.006392598  | 4.594428062  |
| O  | 3.956864119  | 8.104620934  | 1.326083302  | O  | 4.001735210  | 8.064916611  | 1.305091500  | O  | 3.988563538  | 8.028696060  | 1.317066193  |
| O  | 0.390925586  | 4.143905640  | 7.919016838  | O  | 0.452512026  | 4.101796627  | 7.890596390  | O  | 0.441797554  | 4.117534637  | 7.884013176  |
| O  | 11.014392853 | 1.803558946  | 8.214452744  | O  | 11.047242165 | 1.777845740  | 8.194217682  | O  | 11.078031540 | 1.787127733  | 8.237383842  |
| O  | 9.424465179  | 0.060937896  | 2.967667341  | O  | 9.431516647  | -0.001151010 | 2.884270668  | O  | 9.421292305  | -0.013719067 | 2.871371269  |
| O  | 17.438037872 | 2.171583414  | 2.220484972  | O  | 17.483242035 | 2.172409296  | 2.236234903  | O  | 17.477828979 | 2.162734985  | 2.225609303  |
| O  | 12.401494980 | 0.314370990  | 0.136119291  | O  | 12.410547256 | 0.319291323  | 0.122074597  | O  | 12.405768394 | 0.270214707  | 0.104568683  |
| O  | 10.977499962 | 8.296900749  | 2.259513617  | O  | 11.011774063 | 8.265645981  | 2.235343456  | O  | 10.993984222 | 8.240715027  | 2.219657183  |
| O  | 9.409646988  | 2.909579992  | 0.090458952  | O  | 9.476630211  | 2.905194759  | 0.070514344  | O  | 9.443978310  | 2.898554087  | 0.066359922  |
| O  | 15.688942909 | 6.936845303  | 0.927836001  | O  | 15.704607964 | 6.896981239  | 0.931938469  | O  | 15.703983307 | 6.894369602  | 0.928991556  |
| O  | 17.547576904 | 8.742278099  | 6.247140884  | O  | 17.586393356 | 8.696209908  | 6.302220345  | O  | 17.588521957 | 8.716481209  | 6.265939713  |
| O  | 15.916079521 | 0.435251474  | 6.926341534  | O  | 15.940647125 | 0.407588243  | 6.885076523  | O  | 15.939562798 | 0.397656798  | 6.888946056  |



|   |              |              |              |   |              |              |              |   |              |              |              |
|---|--------------|--------------|--------------|---|--------------|--------------|--------------|---|--------------|--------------|--------------|
| O | 17.516416550 | 5.908539772  | 8.994956017  | O | 17.568954468 | 5.848634243  | 8.967298508  | O | 17.552007675 | 5.841259003  | 8.970541000  |
| O | 9.509812355  | 6.558303833  | 6.920805931  | O | 9.546660423  | 6.532960892  | 6.874465466  | O | 9.556435585  | 6.520969868  | 6.869868755  |
| O | 14.462125778 | 8.485472679  | 9.073553085  | O | 14.537268639 | 8.495478630  | 9.073049545  | O | 14.538459778 | 8.462365150  | 9.072480202  |
| O | 10.744943619 | 6.282868385  | 9.249278069  | O | 10.794898033 | 6.284194469  | 9.206578255  | O | 10.833034515 | 6.272029877  | 9.188112259  |
| O | 8.719432831  | 1.967583179  | 6.831205368  | O | 8.776082993  | 1.991049290  | 6.783232212  | O | 8.817538261  | 1.948255777  | 6.802747250  |
| O | 15.577708244 | 9.182798386  | 2.354088545  | O | 15.607123375 | 9.180021286  | 2.318756580  | O | 15.606342316 | 9.173649788  | 2.325967789  |
| O | 15.518630981 | 1.709498405  | 9.234973907  | O | 15.600457191 | 1.712805510  | 9.188437462  | O | 15.601920128 | 1.679866076  | 9.205292702  |
| O | 8.741631508  | 6.847267628  | 2.436976433  | O | 8.817400932  | 6.759423256  | 2.422055006  | O | 8.808418274  | 6.733956337  | 2.488939285  |
| O | 11.391538620 | -0.445242584 | 6.818001747  | O | 11.458310127 | -0.483655661 | 6.817680359  | O | 11.419243813 | -0.473720133 | 6.851389408  |
| O | 9.950110435  | 7.758595467  | 4.620307922  | O | 9.966923714  | 7.774412632  | 4.596289635  | O | 9.988716125  | 7.820922852  | 4.613579273  |
| O | 13.450644493 | 0.783881128  | 7.890385151  | O | 13.498011589 | 0.784266591  | 7.900053978  | O | 13.501508713 | 0.744926751  | 7.908051968  |
| O | 16.932909012 | 4.568990231  | 1.225745797  | O | 16.958837509 | 4.536310673  | 1.160366535  | O | 16.923767090 | 4.527977943  | 1.175648332  |
| O | 16.985746384 | 1.041108131  | 4.595965862  | O | 17.075351715 | 0.979061723  | 4.581110954  | O | 17.056905746 | 0.995508790  | 4.580100536  |
| O | 13.379981995 | 8.005696297  | 1.285561681  | O | 13.404783249 | 8.003723145  | 1.256649852  | O | 13.407654762 | 7.994804382  | 1.276086092  |
| O | 9.858200073  | 4.141343594  | 7.923324108  | O | 9.915088654  | 4.130255222  | 7.921386242  | O | 9.901978493  | 4.112536430  | 7.927519798  |
| O | 0.911885142  | 1.085567236  | 17.586322784 | O | 0.958202124  | 1.059215188  | 17.604095459 | O | 0.946150184  | 1.050363421  | 17.607414246 |
| O | -0.644532502 | -0.601254821 | 12.310508728 | O | -0.592761159 | -0.631872356 | 12.301538467 | O | -0.601012111 | -0.637384474 | 12.344106674 |
| O | 7.445219040  | 1.456280470  | 11.655996323 | O | 7.503177643  | 1.459384918  | 11.649846077 | O | 7.441875458  | 1.438983083  | 11.656520844 |
| O | 2.225512981  | -0.408698201 | 9.485562325  | O | 2.282524586  | -0.462218761 | 9.455825806  | O | 2.271467209  | -0.451565772 | 9.438223839  |
| O | 0.834761858  | 7.538683414  | 11.562713623 | O | 0.913178742  | 7.526865482  | 11.564574242 | O | 0.896644354  | 7.545917988  | 11.557743073 |
| O | -0.712794542 | 2.262989759  | 9.488101006  | O | -0.644258738 | 2.245067120  | 9.492621422  | O | -0.655058622 | 2.270648956  | 9.492691040  |
| O | 5.690284252  | 6.347786427  | 10.527691841 | O | 5.746429920  | 6.333534241  | 10.509315491 | O | 5.705259800  | 6.286449432  | 10.328798294 |
| O | 7.393086433  | 7.972522736  | 15.686529160 | O | 7.479768753  | 8.017362595  | 15.699821472 | O | 7.437025547  | 7.949586391  | 15.682117462 |
| O | 5.788531303  | -0.258631110 | 16.291482925 | O | 5.809447289  | -0.301865220 | 16.237775803 | O | 5.800770760  | -0.335131943 | 16.268642426 |
| O | 7.326184273  | 5.098529816  | 18.292940140 | O | 7.357896328  | 5.053518772  | 18.272672653 | O | 7.392319679  | 5.041864395  | 18.328420639 |
| O | -0.554524958 | 5.828464508  | 16.218910217 | O | -0.518708885 | 5.805377960  | 16.209096909 | O | -0.544843554 | 5.794635773  | 16.204858780 |
| O | 4.32087062   | 7.736086845  | 18.400848389 | O | 4.348763466  | 7.658734322  | 18.343862534 | O | 4.332519531  | 7.695835590  | 18.413789749 |
| O | 0.707570076  | 5.555328846  | 18.533901215 | O | 0.736302376  | 5.529494762  | 18.522056580 | O | 0.721440196  | 5.528676987  | 18.518115997 |
| O | -1.375464559 | 1.246737123  | 16.180173874 | O | -1.319359660 | 1.210057020  | 16.188173294 | O | -1.334784985 | 1.196340442  | 16.198474884 |
| O | 5.899468422  | -0.676161826 | 11.706317902 | O | 5.969954491  | -0.678384662 | 11.652163506 | O | 6.023140907  | -0.795764029 | 11.657858849 |
| O | 5.402071476  | 0.981032014  | 18.637016296 | O | 5.489505768  | 0.889265895  | 18.613979340 | O | 5.448523998  | 0.928636909  | 18.611335754 |
| O | 17.370025635 | 6.165799141  | 11.861968040 | O | -1.385534286 | 6.141108513  | 11.840918541 | O | -1.390320778 | 6.140085220  | 11.839924812 |
| O | 1.330511808  | -1.156260371 | 16.165418625 | O | 1.367722273  | -1.175914049 | 16.166030884 | O | 1.343904972  | -1.185948372 | 16.177896500 |
| O | -0.107210457 | 7.112129211  | 13.951432228 | O | -0.044813752 | 7.080273628  | 13.947052002 | O | -0.038097680 | 7.058873177  | 13.947624207 |
| O | 3.352082253  | 0.108204961  | 17.238555908 | O | 3.389487267  | 0.071975470  | 17.269433975 | O | 3.373366356  | 0.059320331  | 17.253849030 |
| O | 6.785507679  | 3.777154922  | 10.633798599 | O | 6.849833012  | 3.770198822  | 10.611387253 | O | 6.889676571  | 3.765189409  | 10.601224899 |
| O | 6.871932983  | 0.265936017  | 13.968273163 | O | 6.911787987  | 0.221477032  | 13.943202972 | O | 6.867571831  | 0.186953664  | 13.946558952 |
| O | 3.247221947  | 7.356672764  | 10.698612213 | O | 3.311758518  | 7.328487396  | 10.681174278 | O | 3.301116467  | 7.342375278  | 10.669062614 |
| O | -0.224573731 | 3.409443617  | 17.278371811 | O | -0.199051499 | 3.389472961  | 17.281032562 | O | -0.185197353 | 3.379244089  | 17.272409439 |
| O | 10.331260681 | 1.054738998  | 17.572889328 | O | 10.360368729 | 1.027199745  | 17.489583969 | O | 10.339085579 | 0.989175081  | 17.519399643 |
| O | 8.565990448  | -0.856565535 | 12.245575905 | O | 8.627378464  | -0.859640360 | 12.204810143 | O | 8.684194565  | -0.801533818 | 12.247840881 |
| O | 16.722030640 | 1.440407753  | 11.589503288 | O | 16.773387909 | 1.414215446  | 11.570616722 | O | 16.790502548 | 1.416550875  | 11.581135750 |
| O | 11.682080269 | -0.433369040 | 9.467311859  | O | 11.726283073 | -0.438135177 | 9.469730377  | O | 11.729381561 | -0.452811241 | 9.494948387  |
| O | 10.220643997 | 7.570549011  | 11.581776619 | O | 10.285304070 | 7.538967133  | 11.563249588 | O | 10.269185066 | 7.471182823  | 11.557686806 |

|    |              |              |              |    |              |              |              |    |              |              |              |
|----|--------------|--------------|--------------|----|--------------|--------------|--------------|----|--------------|--------------|--------------|
| O  | 8.724901199  | 2.255030155  | 9.475168228  | O  | 8.753336906  | 2.217028618  | 9.438410759  | O  | 8.758255005  | 2.169847727  | 9.450161934  |
| O  | 14.940546036 | 6.183706760  | 10.312361717 | O  | 15.022391319 | 6.184225559  | 10.295835495 | O  | 15.009318352 | 6.165597916  | 10.321216583 |
| O  | 16.872966766 | 8.024488449  | 15.676284790 | O  | 16.917312622 | 7.998095989  | 15.628211975 | O  | 16.904399872 | 7.988549232  | 15.610050201 |
| O  | 15.235983849 | -0.259386182 | 16.294509888 | O  | 15.283066750 | -0.301157176 | 16.263460159 | O  | 15.270989418 | -0.319032013 | 16.266052246 |
| O  | 16.901241302 | 5.147205353  | 18.393966675 | O  | 16.919092178 | 5.145023823  | 18.373209000 | O  | 16.907606125 | 5.104331493  | 18.363187790 |
| O  | 8.809782982  | 5.786065578  | 16.225236893 | O  | 8.828191757  | 5.776337624  | 16.192499161 | O  | 8.814704895  | 5.748583317  | 16.221290588 |
| O  | 13.785234451 | 7.746718884  | 18.425458908 | O  | 13.842579842 | 7.679908276  | 18.380203247 | O  | 13.832098007 | 7.678609371  | 18.390583038 |
| O  | 9.966496468  | 5.561161518  | 18.621412277 | O  | 9.995592117  | 5.573626518  | 18.572683334 | O  | 10.039381027 | 5.513497353  | 18.580141068 |
| O  | 8.033568382  | 1.225650072  | 16.180255890 | O  | 8.028047562  | 1.256069541  | 16.157737732 | O  | 8.025913239  | 1.202606559  | 16.150630951 |
| O  | 14.918052673 | 8.423911095  | 11.726180077 | O  | 14.959152222 | 8.407119751  | 11.732885361 | O  | 14.963799477 | 8.407734871  | 11.735166550 |
| O  | 14.826828003 | 0.970577836  | 18.617853165 | O  | 14.911246300 | 0.890949249  | 18.609195709 | O  | 14.879621506 | 0.891708136  | 18.603950500 |
| O  | 8.129103661  | 5.899493217  | 11.919186592 | O  | 8.178864479  | 5.889503002  | 11.892926216 | O  | 8.063336372  | 5.944865704  | 11.898376465 |
| O  | 10.691758156 | -1.213062525 | 16.235956192 | O  | 10.787126541 | -1.258599758 | 16.209127426 | O  | 10.752399445 | -1.278133869 | 16.195240021 |
| O  | 9.279955864  | 7.112378120  | 13.978911400 | O  | 9.304788589  | 7.102547169  | 13.957032204 | O  | 9.288565636  | 7.032269001  | 13.957839012 |
| O  | 12.768343925 | 0.039442182  | 17.255861282 | O  | 12.823002815 | 0.022032261  | 17.270629883 | O  | 12.804524422 | -0.009957075 | 17.248659134 |
| O  | 16.237751007 | 3.829328537  | 10.593151093 | O  | 16.296760559 | 3.805083275  | 10.597502708 | O  | 16.264968872 | 3.798016548  | 10.605468750 |
| O  | 16.322145462 | 0.288560629  | 13.963355064 | O  | 16.382787704 | 0.292783499  | 13.951113701 | O  | 16.360822678 | 0.309411764  | 13.959026337 |
| O  | 12.660326958 | 7.341878891  | 10.727924347 | O  | 12.727710724 | 7.312948227  | 10.675822258 | O  | 12.727287292 | 7.309523106  | 10.706273079 |
| O  | 9.132473946  | 3.384512424  | 17.309597015 | O  | 9.198544502  | 3.379331589  | 17.283426285 | O  | 9.180136681  | 3.344677687  | 17.265415192 |
| O  | 2.803781033  | 2.995143414  | 14.831634521 | O  | 2.580656528  | 2.581143856  | 14.989624977 | O  | 2.824178219  | 2.932784557  | 14.906591415 |
| O  | 3.002089500  | 4.362455368  | 14.475152969 | O  | 2.685470819  | 3.963357925  | 14.646951675 | O  | 2.847687006  | 4.325543880  | 14.608754158 |
| O  | 3.910274267  | 4.532136440  | 12.004645348 | O  | 3.612508774  | 4.270142555  | 12.227576256 | O  | 3.092787266  | 4.407172203  | 11.871576309 |
| Cu | 3.528106689  | 2.034630775  | 13.275177002 | Cu | 3.386468172  | 1.723541617  | 13.407551765 | Cu | 3.476269960  | 2.010141373  | 13.281156540 |
| Cu | 3.798881531  | 4.095111370  | 16.202470779 | Cu | 3.540853024  | 3.790989161  | 16.355604172 | Cu | 3.749348640  | 4.054553032  | 16.294998169 |
| H  | 15.052636147 | 6.198997974  | 0.845786035  | H  | 15.064523697 | 6.161781311  | 0.862000704  | H  | 15.063087463 | 6.159840107  | 0.856548429  |
| H  | 3.483928680  | 0.036086321  | 14.967981339 | H  | 2.759057283  | -0.483549178 | 14.699774742 | H  | 3.170166969  | -0.042406201 | 14.954348564 |
| H  | 2.738498211  | -0.460601628 | 13.587028503 | H  | 3.278949976  | -0.876335442 | 13.190999031 | H  | 3.015605927  | -0.584351599 | 13.409530640 |
| H  | 4.377402782  | -0.345026970 | 13.633251190 | H  | 4.368173122  | -0.433475256 | 14.353108406 | H  | 4.506542206  | -0.232410550 | 14.021299362 |
| H  | 2.878921986  | 1.075910091  | 10.984697342 | H  | 2.911468506  | 0.935559332  | 11.009747505 | H  | 2.924429893  | 1.077993274  | 10.961209297 |
| H  | 3.828649282  | 2.402935028  | 10.727108955 | H  | 3.909941912  | 2.246777058  | 10.922019005 | H  | 4.111442566  | 2.202306509  | 10.744360924 |
| H  | 4.501061916  | 0.992156804  | 11.228836060 | H  | 4.509047031  | 0.783302724  | 11.382914543 | H  | 4.479237556  | 0.732603014  | 11.363700867 |
| H  | 14.298059464 | 5.454320431  | 10.211042404 | H  | 14.377660751 | 5.459324360  | 10.174777985 | H  | 14.363562584 | 5.437904358  | 10.228506088 |
| H  | 3.821820021  | 4.104275703  | 18.713718414 | H  | 5.118918896  | 5.450336456  | 0.119608559  | H  | 5.116427422  | 5.488824368  | 0.091711774  |
| H  | 2.569951296  | 3.138068438  | 18.161527634 | H  | 2.505806208  | 2.902138948  | 18.457654953 | H  | 2.518634319  | 3.023734093  | 18.230976105 |
| H  | 4.115457058  | 2.555687189  | 18.238454819 | H  | 4.087237358  | 2.413751602  | 18.436294556 | H  | 4.076443195  | 2.478024960  | 18.324346542 |
| H  | 5.542275906  | 5.847059250  | 15.513910294 | H  | 5.155699253  | 5.496398926  | 15.436424255 | H  | 5.467074871  | 5.967790604  | 15.760963440 |
| H  | 4.769284725  | 6.347102165  | 16.879915237 | H  | 4.526354790  | 6.072372437  | 16.889261246 | H  | 4.687079430  | 6.248760700  | 17.167264938 |
| H  | 5.966294765  | 5.254765511  | 17.001113892 | H  | 5.732550144  | 4.992207527  | 16.941755295 | H  | 5.919919968  | 5.191069603  | 17.133985519 |
| N  | 3.512106419  | 0.105968952  | 13.947065353 | H  | 5.927656651  | 7.021480560  | 14.000061989 | H  | 5.144566059  | 6.435273647  | 13.254623413 |
| N  | 3.682190895  | 1.601681828  | 11.349081993 | H  | 5.111617565  | 6.079979897  | 12.951617241 | H  | 5.250520229  | 5.075920105  | 14.236439705 |
| N  | 3.552696943  | 3.387251139  | 18.018428802 | H  | 6.582163811  | 5.635905266  | 13.464156151 | H  | 6.494591713  | 5.434337139  | 13.125395775 |
| N  | 5.157958508  | 5.523110390  | 16.404502869 | N  | 3.438124657  | -0.233851850 | 13.972869873 | N  | 3.529293060  | 0.072404981  | 14.004307747 |
| N  | 4.159368515  | 3.904015541  | 12.952972412 | N  | 3.696470737  | 1.409053087  | 11.472200394 | N  | 3.771157742  | 1.476151347  | 11.381359100 |
|    |              |              |              | N  | 3.457058191  | 3.196970701  | 18.223783493 | N  | 3.497498512  | 3.299190044  | 18.111137390 |

|                                |              |              |                                |              |              |                                |              |              |              |              |              |
|--------------------------------|--------------|--------------|--------------------------------|--------------|--------------|--------------------------------|--------------|--------------|--------------|--------------|--------------|
|                                | N            | 4.876689434  | 5.231275558                    | 16.417798996 | N            | 5.090983868                    | 5.498698235  | 16.590049744 |              |              |              |
|                                | N            | 3.881922722  | 3.637487411                    | 13.175972939 | N            | 3.692519903                    | 3.970337391  | 12.767795563 |              |              |              |
|                                | N            | 5.699466705  | 6.049354553                    | 13.787545204 | N            | 5.497673988                    | 5.486206532  | 13.348015785 |              |              |              |
| <b>Structure I<sub>3</sub></b> |              |              | <b>Structure J<sub>3</sub></b> |              |              | <b>Structure K<sub>3</sub></b> |              |              |              |              |              |
| Si                             | 0.195088983  | 2.442432642  | 8.170463562                    | Si           | 0.131778061  | 2.546823025                    | 8.149000168  | Si           | 0.080103815  | 2.549339533  | 8.228446960  |
| Si                             | 8.001094818  | 0.657417059  | 3.095283747                    | Si           | 7.960992813  | 0.722699463                    | 3.076645136  | Si           | 7.889608383  | 0.737042248  | 3.144510031  |
| Si                             | 2.467935801  | 8.158400536  | 0.881959558                    | Si           | 2.417836666  | 8.247150421                    | 0.882945180  | Si           | 2.353227854  | 8.259913445  | 0.931133628  |
| Si                             | 5.574268341  | 8.286371231  | 1.127954125                    | Si           | 5.557272911  | 8.352200508                    | 1.105158806  | Si           | 5.470675945  | 8.360114098  | 1.183571696  |
| Si                             | 7.939347267  | 0.594998479  | 6.215335846                    | Si           | 7.904254436  | 0.690327466                    | 6.200273037  | Si           | 7.850917816  | 0.710954785  | 6.267478466  |
| Si                             | 0.154631197  | 5.606751919  | 8.280663490                    | Si           | 0.036174953  | 5.700570583                    | 8.285870552  | Si           | 0.030784011  | 5.719343185  | 8.347519875  |
| Si                             | 0.215866536  | 7.922725677  | 6.190635204                    | Si           | 0.168601334  | 8.007802010                    | 6.198464870  | Si           | 0.099641502  | 8.005869865  | 6.231440544  |
| Si                             | 5.639523983  | 0.331313610  | 8.369127274                    | Si           | 5.592991352  | 0.473073900                    | 8.331377029  | Si           | 5.538071632  | 0.476634800  | 8.419378281  |
| Si                             | 2.523791552  | 0.324892819  | 8.204174995                    | Si           | 2.470142365  | 0.431374669                    | 8.180324554  | Si           | 2.407482147  | 0.432448089  | 8.217355728  |
| Si                             | 0.177398905  | 8.006809235  | 3.092792034                    | Si           | 0.158232555  | 8.091576576                    | 3.113214254  | Si           | 0.080159724  | 8.083694458  | 3.145882368  |
| Si                             | 7.988520145  | 2.968465090  | 0.932593822                    | Si           | 7.958281994  | 3.024487019                    | 0.892306149  | Si           | 7.904130936  | 3.033893108  | 0.981443465  |
| Si                             | 9.609317780  | 2.433345079  | 8.124233246                    | Si           | 9.580055237  | 2.530915499                    | 8.122852325  | Si           | 9.499331474  | 2.552332401  | 8.195314407  |
| Si                             | 17.419975281 | 0.693684638  | 3.076284885                    | Si           | 17.400676727 | 0.759489596                    | 3.102735758  | Si           | 17.346702576 | 0.797132611  | 3.144150019  |
| Si                             | 11.831039429 | 8.135890961  | 0.914238453                    | Si           | 11.815764427 | 8.234712601                    | 0.922813833  | Si           | 11.733841896 | 8.240540504  | 0.996694803  |
| Si                             | 14.942379951 | 8.350714684  | 1.122837543                    | Si           | 14.923616409 | 8.426327705                    | 1.137622833  | Si           | 14.853000641 | 8.464833260  | 1.209070206  |
| Si                             | 17.394594193 | 0.605144322  | 6.199900150                    | Si           | 17.328859329 | 0.682358861                    | 6.218909740  | Si           | 17.281047821 | 0.713882208  | 6.255029678  |
| Si                             | 9.545036316  | 5.559192657  | 8.331313133                    | Si           | 9.551727295  | 5.662056923                    | 8.348631859  | Si           | 9.426774025  | 5.658132076  | 8.393923759  |
| Si                             | 9.584769249  | 7.866414547  | 6.201995850                    | Si           | 9.560767174  | 7.970204830                    | 6.203587532  | Si           | 9.482190132  | 7.984944820  | 6.273242474  |
| Si                             | 15.049073219 | 0.435713768  | 8.296165466                    | Si           | 15.025692940 | 0.445385516                    | 8.357272148  | Si           | 14.942153931 | 0.536658049  | 8.356185913  |
| Si                             | 11.918719292 | 0.293498218  | 8.126800537                    | Si           | 11.860781670 | 0.372462809                    | 8.146159172  | Si           | 11.809796333 | 0.407983124  | 8.206110001  |
| Si                             | 9.593745232  | 7.974207878  | 3.095729589                    | Si           | 9.556553841  | 8.040042877                    | 3.100870371  | Si           | 9.478333473  | 8.030642509  | 3.169258356  |
| Si                             | 17.365943909 | 2.970328569  | 0.890752971                    | Si           | 17.377582550 | 3.042736292                    | 0.924264491  | Si           | 17.300336838 | 3.077462435  | 0.945418954  |
| Si                             | -0.538917243 | 1.710927844  | 17.519968033                   | Si           | -0.542849302 | 1.790034413                    | 17.543815613 | Si           | -0.615569770 | 1.824123383  | 17.556011200 |
| Si                             | 7.282764912  | -0.126029670 | 12.408767700                   | Si           | 7.237599373  | -0.023856878                   | 12.395155907 | Si           | 7.189210415  | -0.014727890 | 12.504117966 |
| Si                             | 1.785218239  | 7.379333019  | 10.280164719                   | Si           | 1.709509134  | 7.495733738                    | 10.275862694 | Si           | 1.673157215  | 7.511747360  | 10.323999405 |
| Si                             | 4.881000996  | 7.511042118  | 10.534277916                   | Si           | 4.827402592  | 7.607025146                    | 10.484686852 | Si           | 4.785431385  | 7.627321243  | 10.592333794 |
| Si                             | 7.263226986  | -0.169599652 | 15.569425583                   | Si           | 7.222465515  | -0.052046061                   | 15.542670250 | Si           | 7.164525032  | -0.057705641 | 15.633836746 |
| Si                             | -0.514315128 | 4.888490677  | 17.696521759                   | Si           | -0.568921030 | 4.954563141                    | 17.711675644 | Si           | -0.621342957 | 4.988180161  | 17.724418640 |
| Si                             | -0.494685173 | 7.182897568  | 15.556928635                   | Si           | -0.548323572 | 7.242616653                    | 15.557049751 | Si           | -0.590244889 | 7.288870811  | 15.591825485 |
| Si                             | 4.921396732  | -0.271420717 | 17.685680389                   | Si           | 4.901033878  | -0.226500154                   | 17.655206680 | Si           | 4.837954044  | -0.230111957 | 17.746339798 |
| Si                             | 1.801333785  | -0.387817204 | 17.496330261                   | Si           | 1.757446289  | -0.329363585                   | 17.492656708 | Si           | 1.700850248  | -0.295046568 | 17.547574997 |
| Si                             | -0.507267892 | 7.247766495  | 12.449432373                   | Si           | -0.543917239 | 7.293276787                    | 12.453993797 | Si           | -0.607977986 | 7.368032932  | 12.501673698 |
| Si                             | 7.340656757  | 2.161778688  | 10.304518700                   | Si           | 7.315031052  | 2.271838665                    | 10.282567978 | Si           | 7.207719326  | 2.301019907  | 10.388636589 |
| Si                             | 8.906858444  | 1.655722141  | 17.532440186                   | Si           | 8.865668297  | 1.757213473                    | 17.509679794 | Si           | 8.812963486  | 1.764097333  | 17.602918625 |
| Si                             | 16.764322281 | -0.052676141 | 12.436676979                   | Si           | 16.710315704 | 0.051511467                    | 12.477983475 | Si           | 16.638902664 | 0.050028086  | 12.504042625 |
| Si                             | 11.157953262 | 7.394046783  | 10.262632370                   | Si           | 11.097802162 | 7.476138115                    | 10.265676498 | Si           | 11.046347618 | 7.500098228  | 10.343743324 |
| Si                             | 14.257394791 | 7.620621681  | 10.482641220                   | Si           | 14.211887360 | 7.709600449                    | 10.554325104 | Si           | 14.145970345 | 7.717738628  | 10.559436798 |
| Si                             | 16.683143616 | -0.128885031 | 15.564201355                   | Si           | 16.650039673 | -0.041140437                   | 15.587870598 | Si           | 16.576801300 | -0.028945088 | 15.615402222 |
| Si                             | 8.814607620  | 4.811117649  | 17.666187286                   | Si           | 8.828825951  | 4.926329136                    | 17.684900284 | Si           | 8.752172470  | 4.935192108  | 17.778102875 |
| Si                             | 8.890970230  | 7.110894203  | 15.558211327                   | Si           | 8.893397331  | 7.234818459                    | 15.562740326 | Si           | 8.819259644  | 7.226298332  | 15.627306938 |

|    |              |              |              |    |              |              |              |    |              |              |              |
|----|--------------|--------------|--------------|----|--------------|--------------|--------------|----|--------------|--------------|--------------|
| Si | 14.348778725 | -0.319554687 | 17.662776947 | Si | 14.326618195 | -0.230155587 | 17.687076569 | Si | 14.264160156 | -0.220133066 | 17.738052368 |
| Si | 11.222500801 | -0.455682278 | 17.518058777 | Si | 11.202323914 | -0.347059846 | 17.526205063 | Si | 11.120148659 | -0.342246890 | 17.593753815 |
| Si | 8.910148621  | 7.072644234  | 12.423856735 | Si | 8.829589844  | 7.164805889  | 12.452085495 | Si | 8.827072144  | 7.198531628  | 12.514980316 |
| Si | 16.700483322 | 2.240841150  | 10.272669792 | Si | 16.687984467 | 2.295587063  | 10.296756744 | Si | 16.597648621 | 2.335608244  | 10.322115898 |
| Al | 7.870059967  | 6.146567822  | 1.100967050  | Al | 7.859054565  | 6.218310356  | 1.123553634  | Al | 7.766290665  | 6.227789879  | 1.192856669  |
| Al | 17.463575363 | 6.121360779  | 1.161341667  | Al | 17.416597366 | 6.190114975  | 1.200386524  | Al | 17.351598740 | 6.214952946  | 1.191835523  |
| Al | 7.243206501  | 5.302536964  | 10.540950775 | Al | 7.206485748  | 5.429361343  | 10.547513008 | Al | 7.127559662  | 5.422499657  | 10.587123871 |
| Al | 16.744997025 | 5.373085976  | 10.462660789 | Al | 16.642967224 | 5.465748787  | 10.449428558 | Al | 16.639339447 | 5.478033066  | 10.526939392 |
| O  | 1.637173176  | 1.689906240  | 8.351858139  | O  | 1.571454525  | 1.789728999  | 8.305042267  | O  | 1.535333157  | 1.804977059  | 8.360777855  |
| O  | 0.050570816  | 0.031006560  | 2.973692417  | O  | 0.043893203  | 0.123267084  | 3.016573429  | O  | -0.028647080 | 0.118963063  | 3.068048000  |
| O  | 8.030592918  | 2.048700094  | 2.267130613  | O  | 7.964579105  | 2.102872372  | 2.223085642  | O  | 7.947466850  | 2.135309219  | 2.330057383  |
| O  | 2.983661652  | 0.187749177  | 0.094927989  | O  | 2.878276587  | 0.273314774  | 0.099623039  | O  | 2.832341433  | 0.287582278  | 0.141316816  |
| O  | 1.511390686  | 8.154654503  | 2.175900221  | O  | 1.501854777  | 8.234107971  | 2.207401752  | O  | 1.415743232  | 8.241031647  | 2.239483833  |
| O  | -0.016819498 | 2.867411375  | 0.137835801  | O  | 0.003813471  | 2.952591419  | 0.177933902  | O  | -0.081503287 | 3.020263195  | 0.188103482  |
| O  | 6.293493271  | 6.885103226  | 0.824967563  | O  | 6.280921936  | 6.947267532  | 0.819077313  | O  | 6.187345505  | 6.953141689  | 0.934433460  |
| O  | 8.148562431  | 8.635232925  | 6.344691277  | O  | 8.113018990  | 8.729568481  | 6.328571320  | O  | 8.035495758  | 8.739353180  | 6.411464691  |
| O  | 6.534159660  | 0.358256280  | 7.012989521  | O  | 6.482413292  | 0.452993751  | 6.971577168  | O  | 6.449353695  | 0.503875256  | 7.083115578  |
| O  | 8.146124840  | 5.647655010  | 9.092571259  | O  | 8.177767754  | 5.784129620  | 9.152340889  | O  | 7.998098850  | 5.674253464  | 9.102796555  |
| O  | 0.181229770  | 6.451222420  | 6.880634785  | O  | 0.099914432  | 6.540081501  | 6.888679504  | O  | 0.054390788  | 6.545496941  | 6.940514088  |
| O  | 5.009308338  | 8.259028435  | 9.077963829  | O  | 4.970086098  | 8.420841217  | 9.069948196  | O  | 4.951261520  | 8.433113098  | 9.170928001  |
| O  | 1.348906517  | 6.178725243  | 9.265742302  | O  | 1.189888716  | 6.296128273  | 9.304286957  | O  | 1.226729512  | 6.311026573  | 9.323076248  |
| O  | -0.614677370 | 1.839103937  | 6.879994392  | O  | 18.138488770 | 1.945700169  | 6.874507904  | O  | 18.092380524 | 1.955286503  | 6.948283195  |
| O  | 6.190502167  | 9.088257790  | 2.395214319  | O  | 6.154359818  | 9.131626129  | 2.398925066  | O  | 6.055687428  | 9.192873955  | 2.454106092  |
| O  | 6.177222252  | 1.435319781  | 9.426488876  | O  | 6.142677784  | 1.607417345  | 9.352748871  | O  | 6.001449585  | 1.628052115  | 9.484335899  |
| O  | 18.079729080 | 6.800561905  | 2.606798172  | O  | 18.045635223 | 6.901435852  | 2.619310141  | O  | 17.980447769 | 6.894837856  | 2.629832745  |
| O  | 2.017287731  | -0.536988080 | 6.927709579  | O  | 1.988966703  | -0.457119435 | 6.913528919  | O  | 1.913755417  | -0.456633091 | 6.960270405  |
| O  | 0.648398995  | 7.783998013  | 4.635374546  | O  | 0.619580925  | 7.848342896  | 4.651972294  | O  | 0.538261712  | 7.817968845  | 4.686829567  |
| O  | 4.089775085  | 0.710269392  | 8.004488945  | O  | 4.032517433  | 0.843369067  | 7.988683701  | O  | 3.979526281  | 0.811721802  | 8.043120384  |
| O  | 7.604309082  | 4.457408428  | 1.299689651  | O  | 7.582546711  | 4.521702766  | 1.233806729  | O  | 7.518461227  | 4.529017925  | 1.308149934  |
| O  | 7.587931156  | 0.912448168  | 4.652055264  | O  | 7.571665287  | 1.014875889  | 4.631612301  | O  | 7.491804123  | 1.009245634  | 4.706840515  |
| O  | 3.995830059  | 8.012533188  | 1.392228007  | O  | 3.965799332  | 8.119642258  | 1.325498462  | O  | 3.880268097  | 8.135109901  | 1.435364842  |
| O  | 0.485160470  | 4.029677391  | 7.958216190  | O  | 0.406380594  | 4.136509418  | 7.952056885  | O  | 0.359236002  | 4.140839577  | 8.039768219  |
| O  | 11.040740013 | 1.651818752  | 8.243503571  | O  | 11.016647339 | 1.757995129  | 8.222903252  | O  | 10.916800499 | 1.754321456  | 8.362176895  |
| O  | 9.488677979  | 0.010826200  | 3.028727531  | O  | 9.447948456  | 0.074821934  | 3.004510641  | O  | 9.361711502  | 0.057683557  | 3.070541382  |
| O  | 17.406522751 | 2.089666367  | 2.261700869  | O  | 17.404823303 | 2.153093815  | 2.286017656  | O  | 17.374156952 | 2.175933123  | 2.300735235  |
| O  | 12.433589935 | 0.187210247  | 0.167846844  | O  | 12.393225670 | 0.283845276  | 0.168396741  | O  | 12.281717300 | 0.277218848  | 0.226627961  |
| O  | 11.014743805 | 8.178111076  | 2.295913219  | O  | 10.963338852 | 8.256114006  | 2.280845881  | O  | 10.891192436 | 8.251061440  | 2.361189842  |
| O  | 9.433315277  | 2.833370447  | 0.146952167  | O  | 9.409041405  | 2.878409624  | 0.124545477  | O  | 9.353606224  | 2.881807804  | 0.214197651  |
| O  | 15.720573425 | 6.836879730  | 0.967971861  | O  | 15.698859215 | 6.923638344  | 0.959914207  | O  | 15.607398987 | 6.939350605  | 1.037118316  |
| O  | 17.583015442 | 8.631136894  | 6.310753345  | O  | 17.543956757 | 8.726322174  | 6.327666283  | O  | 17.484231949 | 8.746938705  | 6.341591835  |
| O  | 15.968078613 | 0.384534419  | 6.960348129  | O  | 15.919391632 | 0.433649123  | 7.001079082  | O  | 15.862724304 | 0.452278733  | 7.020905495  |
| O  | 17.570129395 | 5.769005299  | 9.005017281  | O  | 17.419467926 | 5.821311474  | 8.959300041  | O  | 17.447086334 | 5.890635967  | 9.066769600  |
| O  | 9.528605461  | 6.428377151  | 6.945332050  | O  | 9.510839462  | 6.545891285  | 6.971697807  | O  | 9.434742928  | 6.555067062  | 7.028171062  |
| O  | 14.503382683 | 8.393376350  | 9.087971687  | O  | 14.535684586 | 8.394087791  | 9.122329712  | O  | 14.403972626 | 8.507198334  | 9.174515724  |

|   |              |              |              |   |              |              |              |   |              |              |              |
|---|--------------|--------------|--------------|---|--------------|--------------|--------------|---|--------------|--------------|--------------|
| O | 10.778353691 | 6.163311958  | 9.272166252  | O | 10.816649437 | 6.223668575  | 9.266482353  | O | 10.618935585 | 6.269942760  | 9.376025200  |
| O | 8.760496140  | 1.861958265  | 6.845695972  | O | 8.705927849  | 1.954079866  | 6.860429764  | O | 8.676474571  | 1.971850395  | 6.903789520  |
| O | 15.597289085 | 9.090853691  | 2.394671917  | O | 15.604420662 | 9.142949104  | 2.402955770  | O | 15.521034241 | 9.186609268  | 2.484409332  |
| O | 15.560101509 | 1.609452724  | 9.288404465  | O | 15.540880203 | 1.612771988  | 9.362310410  | O | 15.458200455 | 1.731671691  | 9.319081306  |
| O | 8.727519989  | 6.817638874  | 2.432042837  | O | 8.689528465  | 6.853427887  | 2.484136581  | O | 8.619741440  | 6.836187840  | 2.562764168  |
| O | 10.759595871 | 8.795264244  | 6.859366894  | O | 11.423305511 | -0.475459039 | 6.833546638  | O | 11.334697723 | -0.462894231 | 6.926612854  |
| O | 9.968364716  | 7.641992092  | 4.644879341  | O | 9.945974350  | 7.725928783  | 4.647597790  | O | 9.874368668  | 7.746013165  | 4.724303722  |
| O | 13.493671417 | 0.686718464  | 7.917064667  | O | 13.459802628 | 0.697266936  | 8.027770042  | O | 13.384356499 | 0.799708307  | 7.986856461  |
| O | 16.970315933 | 4.479977131  | 1.232216954  | O | 16.963216782 | 4.539786339  | 1.282147646  | O | 16.872783661 | 4.572052956  | 1.307599306  |
| O | 17.045576096 | 0.947672844  | 4.640304565  | O | 16.975364685 | 1.001488209  | 4.655243874  | O | 16.944471359 | 1.079791069  | 4.698935509  |
| O | 13.410434723 | 7.886195660  | 1.306054354  | O | 13.385616302 | 8.000585556  | 1.340979576  | O | 13.315269470 | 8.044273376  | 1.415571690  |
| O | 9.937259674  | 4.012400627  | 7.935465336  | O | 9.884099960  | 4.112128258  | 7.922493935  | O | 9.855758667  | 4.123336315  | 7.991371155  |
| O | 0.913532376  | 0.968937278  | 17.633481979 | O | 0.924193144  | 1.067536473  | 17.611614227 | O | 0.849885464  | 1.093578935  | 17.658193588 |
| O | -0.584210873 | -0.692561269 | 12.360152245 | O | -0.693909943 | -0.693805575 | 12.400412560 | O | -0.709584415 | -0.589971960 | 12.438422203 |
| O | 7.595897675  | 1.307610989  | 11.697031021 | O | 7.448358059  | 1.405369282  | 11.668684959 | O | 7.406161308  | 1.394357562  | 11.736660004 |
| O | 2.339636326  | -0.542605042 | 9.580905914  | O | 2.278977156  | -0.430633545 | 9.560983658  | O | 2.213914156  | -0.403094351 | 9.620536804  |
| O | 0.885843277  | 7.408193111  | 11.629288673 | O | 0.858294666  | 7.562710285  | 11.663306236 | O | 0.787810624  | 7.576507092  | 11.685202599 |
| O | -0.671960473 | 2.179531813  | 9.536102295  | O | -0.715953112 | 2.282475948  | 9.523548126  | O | -0.769592285 | 2.256612301  | 9.598537445  |
| O | 5.744229317  | 6.184335232  | 10.629367828 | O | 5.689280987  | 6.280922890  | 10.497147560 | O | 5.626297474  | 6.293548107  | 10.615196228 |
| O | 7.410614491  | 7.818862915  | 15.719335556 | O | 7.420451641  | 7.969518661  | 15.698702812 | O | 7.334571838  | 7.943486214  | 15.736161232 |
| O | 5.822724342  | -0.373813272 | 16.322204590 | O | 5.787353516  | -0.333305180 | 16.284267426 | O | 5.728130817  | -0.320615768 | 16.377174377 |
| O | 7.343338013  | 4.934621811  | 18.297861099 | O | 7.373840332  | 5.067237854  | 18.356891632 | O | 7.300405502  | 5.098465919  | 18.444641113 |
| O | -0.509362578 | 5.746097088  | 16.305923462 | O | -0.587589443 | 5.811525822  | 16.317970276 | O | -0.603284776 | 5.845816612  | 16.329151154 |
| O | 4.337922096  | 7.695494652  | 18.463169098 | O | 4.373345852  | 7.757394791  | 18.448886871 | O | 4.258788109  | 7.736602306  | 18.506280899 |
| O | 0.759823561  | 5.420092106  | 18.606054306 | O | 0.689883709  | 5.506451607  | 18.620676041 | O | 0.627774119  | 5.530464649  | 18.653484344 |
| O | -1.355487108 | 1.140882492  | 16.215364456 | O | 17.459892273 | 1.207442760  | 16.261611938 | O | 17.395889282 | 1.225566983  | 16.272680283 |
| O | 5.966441154  | -0.817097783 | 11.737578392 | O | 5.921873569  | -0.763210475 | 11.738996506 | O | 5.870116711  | -0.757220984 | 11.857190132 |
| O | 5.438979626  | 0.941530466  | 18.620901108 | O | 5.405439854  | 1.022692919  | 18.561637878 | O | 5.351579666  | 0.987700939  | 18.679056168 |
| O | 17.399520874 | 6.087434292  | 11.874984741 | O | 17.447086334 | 6.087576866  | 11.844410896 | O | 17.325042725 | 6.191436768  | 11.925472260 |
| O | 1.344855547  | -1.227023125 | 16.178995132 | O | 1.295949936  | -1.176361322 | 16.180009842 | O | 1.245715141  | -1.122328520 | 16.218711853 |
| O | -0.118216574 | 6.957613945  | 14.001308441 | O | -0.156840026 | 6.979242325  | 14.008671761 | O | -0.167412698 | 7.071515083  | 14.042330742 |
| O | 3.369452953  | 0.030825496  | 17.285327911 | O | 3.336335182  | 0.023814440  | 17.279457092 | O | 3.280046701  | 0.073527813  | 17.344034195 |
| O | 6.817413807  | 3.614832640  | 10.703052521 | O | 6.798448563  | 3.732399464  | 10.682869911 | O | 6.669404507  | 3.738255978  | 10.853295326 |
| O | 6.988671303  | 0.136649370  | 14.000511169 | O | 6.893187523  | 0.256072760  | 13.979290009 | O | 6.817190647  | 0.277759671  | 14.075658798 |
| O | 3.307140589  | 7.105019093  | 10.772324562 | O | 3.247372866  | 7.228456497  | 10.713969231 | O | 3.198037386  | 7.303215981  | 10.816645622 |
| O | -0.244130015 | 3.303847075  | 17.363334656 | O | -0.263090491 | 3.382122517  | 17.344635010 | O | -0.320405841 | 3.414161682  | 17.353082657 |
| O | 10.356501579 | 0.913667202  | 17.619085312 | O | 10.316830635 | 1.014188290  | 17.585195541 | O | 10.277032852 | 1.043317080  | 17.686218262 |
| O | 7.917643547  | 8.359603882  | 12.249501228 | O | 8.585182190  | -0.893161416 | 12.272686958 | O | 8.539665222  | -0.882549167 | 12.405735016 |
| O | 16.774677277 | 1.353295207  | 11.643237114 | O | 16.829408646 | 1.461779475  | 11.693914413 | O | 16.646997452 | 1.440385580  | 11.686064720 |
| O | 11.747230530 | -0.559561491 | 9.510721207  | O | 11.573685646 | -0.496045798 | 9.497941017  | O | 11.654499054 | -0.462568700 | 9.577327728  |
| O | 10.293557167 | 7.424653530  | 11.626147270 | O | 10.181094170 | 7.443055153  | 11.591135979 | O | 10.199099541 | 7.582247734  | 11.711410522 |
| O | 8.758049011  | 2.152911186  | 9.488181114  | O | 8.749062538  | 2.251445055  | 9.505089760  | O | 8.602210045  | 2.310912132  | 9.546306610  |
| O | 15.006035805 | 6.092514992  | 10.306919098 | O | 14.936695099 | 6.195285797  | 10.568103790 | O | 14.898887634 | 6.189970493  | 10.391324043 |
| O | 16.885913849 | 7.907900333  | 15.707562447 | O | 16.837207794 | 7.980228424  | 15.691810608 | O | 16.787488937 | 8.008264542  | 15.710268021 |

|    |              |              |              |    |              |              |              |    |              |              |              |
|----|--------------|--------------|--------------|----|--------------|--------------|--------------|----|--------------|--------------|--------------|
| O  | 15.256529808 | -0.367226422 | 16.318534851 | O  | 15.224696159 | -0.299512625 | 16.337041855 | O  | 15.166125298 | -0.290186167 | 16.389036179 |
| O  | 16.936658859 | 5.095144272  | 18.468240738 | O  | 16.877307892 | 5.116288662  | 18.480230331 | O  | 16.813489914 | 5.159961700  | 18.478614807 |
| O  | 8.829005241  | 5.618246555  | 16.224739075 | O  | 8.806771278  | 5.767440319  | 16.271938324 | O  | 8.763330460  | 5.782632828  | 16.373193741 |
| O  | 13.815979004 | 7.645387173  | 18.461692810 | O  | 13.762033463 | 7.725532532  | 18.468414307 | O  | 13.746059418 | 7.754413605  | 18.550222397 |
| O  | 9.979340553  | 5.453003883  | 18.639230728 | O  | 10.023446083 | 5.533821106  | 18.640571594 | O  | 11.334612846 | 7.005836010  | 0.006843377  |
| O  | 8.092981339  | 1.072353363  | 16.226606369 | O  | 8.011022568  | 1.213652611  | 16.209611893 | O  | 7.977215767  | 1.188640714  | 16.301988602 |
| O  | 14.969529152 | 8.338019371  | 11.737979889 | O  | 15.523065567 | -0.848262012 | 11.799582481 | O  | 14.846246719 | 8.420268059  | 11.830726624 |
| O  | 14.826631546 | 0.877650976  | 18.636991501 | O  | 14.852387428 | 0.957527041  | 18.647172928 | O  | 14.769083023 | 0.987646222  | 18.684555054 |
| O  | 8.232972145  | 5.717129230  | 11.933013916 | O  | 8.037846565  | 5.842965126  | 12.039476395 | O  | 8.127897263  | 5.894142628  | 11.937687874 |
| O  | 10.022659302 | 8.032073021  | 16.269987106 | O  | 10.733145714 | -1.251025677 | 16.263528824 | O  | 10.627432823 | -1.208910227 | 16.314571381 |
| O  | 9.296521187  | 6.939591408  | 14.010238647 | O  | 9.293193817  | 7.066978455  | 14.017755508 | O  | 9.238160133  | 7.006675720  | 14.086493492 |
| O  | 12.789289474 | -0.085510731 | 17.272493362 | O  | 12.769395828 | 0.052772999  | 17.311174393 | O  | 12.697771072 | 0.008558393  | 17.382535934 |
| O  | 16.267196655 | 3.734606266  | 10.641847610 | O  | 16.224592209 | 3.787338734  | 10.692223549 | O  | 16.186210632 | 3.833310843  | 10.693791389 |
| O  | 16.355922699 | 0.183637381  | 13.995963097 | O  | 16.323432922 | 0.332170129  | 14.036497116 | O  | 16.226511002 | 0.307165265  | 14.057685852 |
| O  | 12.726423264 | 7.208786964  | 10.745511055 | O  | 12.650730133 | 7.415544987  | 10.797549248 | O  | 12.619251251 | 7.279543400  | 10.802154541 |
| O  | 9.190919876  | 3.248044014  | 17.330644608 | O  | 9.154541016  | 3.354747534  | 17.344013214 | O  | 9.068220139  | 3.363795280  | 17.429208755 |
| O  | 2.762300253  | 3.050902367  | 15.277255058 | O  | 3.935424805  | 2.482598305  | 15.227622032 | O  | 3.940233946  | 2.361652374  | 15.043639183 |
| O  | 3.689851522  | 5.032099724  | 14.178536415 | O  | 4.921525002  | 4.370735645  | 14.008051872 | O  | 4.723342419  | 3.776982784  | 13.005355835 |
| O  | 5.556471348  | 2.724098682  | 13.621799469 | O  | 14.122994423 | 4.472702980  | 12.189701080 | O  | 6.823273659  | 4.702785969  | 14.265510559 |
| Cu | 3.199106455  | 3.205993176  | 13.452075005 | Cu | 4.118711948  | 2.644380569  | 13.378298759 | Cu | 3.958709240  | 2.109960079  | 13.269933701 |
| Cu | 3.817239046  | 4.328857899  | 15.896875381 | Cu | 4.598860741  | 4.016903400  | 15.810597420 | Cu | 4.602974415  | 3.807036638  | 15.869738579 |
| H  | 15.090462685 | 6.094345570  | 0.885904253  | H  | 15.132670403 | 6.261464119  | 0.498807132  | H  | 14.965644836 | 6.205939293  | 0.963269889  |
| H  | 2.444053650  | 0.958270550  | 14.174231529 | H  | 3.558326006  | 0.363485217  | 14.159429550 | H  | 3.606397629  | 0.229768395  | 14.686579704 |
| H  | 1.796063423  | 1.060629964  | 12.655645370 | H  | 2.712539196  | 0.509001017  | 12.746617317 | H  | 2.591593266  | -0.075102448 | 13.386919022 |
| H  | 3.390590429  | 0.683466434  | 12.852293968 | H  | 4.326807499  | 0.151540637  | 12.705062866 | H  | 4.226916313  | -0.343845725 | 13.224289894 |
| H  | 3.440306664  | 4.684008598  | 11.337359428 | H  | 3.582125664  | 4.157156944  | 11.418978691 | H  | 3.137438536  | 2.845487595  | 11.032375336 |
| H  | 4.600331306  | 3.531725645  | 11.313643456 | H  | 5.050349236  | 3.470825911  | 11.152721405 | H  | 4.437749863  | 1.883064985  | 10.740454674 |
| H  | 3.073653460  | 3.172752380  | 10.810076714 | H  | 3.664718151  | 2.637654543  | 10.790822029 | H  | 2.961150169  | 1.201132298  | 11.040536880 |
| H  | 14.361149788 | 5.363027573  | 10.222968102 | H  | 14.451279640 | 5.543965340  | 11.265501976 | H  | 14.251131058 | 5.462954044  | 10.309195518 |
| H  | 3.874884367  | 4.195872307  | 18.420349121 | H  | 4.105485439  | 4.252712727  | 18.291488647 | H  | 3.712652683  | 4.128706455  | 18.314435959 |
| H  | 2.584885120  | 3.339938641  | 17.707017899 | H  | 2.971632481  | 3.297492981  | 17.454072952 | H  | 2.648135185  | 3.157898903  | 17.456205368 |
| H  | 4.105425358  | 2.693275452  | 17.724534988 | H  | 4.452437401  | 2.675266743  | 17.851213455 | H  | 4.077467442  | 2.551209927  | 18.022827148 |
| H  | 5.568838596  | 6.111466408  | 15.695003510 | H  | 5.807618141  | 6.204169273  | 15.648227692 | H  | 5.661714554  | 6.114385605  | 15.700786591 |
| H  | 4.744658470  | 6.348995209  | 17.100671768 | H  | 4.781228542  | 6.283143520  | 16.933639526 | H  | 4.588815689  | 6.119227886  | 16.948915482 |
| H  | 5.923445702  | 5.212584972  | 17.033252716 | H  | 6.193370819  | 5.458120346  | 17.095184326 | H  | 6.043640137  | 5.405604839  | 17.142763138 |
| H  | 7.849261284  | 2.732096672  | 13.169968605 | H  | 14.872467041 | 3.895345926  | 11.875534058 | H  | 5.347434044  | 3.766865015  | 12.223399162 |
| H  | 4.587482452  | 5.263033867  | 13.865083694 | H  | 5.872323990  | 4.458509445  | 13.788037300 | N  | 3.518222094  | 0.259043574  | 13.664505005 |
| H  | 8.210878372  | 4.090783119  | 14.305945396 | H  | 14.291515350 | 4.674596786  | 13.126662254 | N  | 3.584753990  | 1.968860388  | 11.316025734 |
| N  | 2.629192829  | 1.264721274  | 13.214188576 | N  | 3.610548496  | 0.707121134  | 13.195777893 | N  | 3.633492947  | 3.380960941  | 17.612493515 |
| N  | 3.601553440  | 3.686742783  | 11.520287514 | N  | 4.081966877  | 3.264866829  | 11.482285500 | N  | 5.272955418  | 5.538446426  | 16.453737259 |
| N  | 3.580940247  | 3.571893215  | 17.645036697 | N  | 3.963152409  | 3.533827305  | 17.554357529 | N  | 6.139170170  | 3.771714211  | 14.411035538 |
| N  | 5.143352985  | 5.624601841  | 16.486274719 | N  | 5.418367863  | 5.660557747  | 16.421958923 |    |              |              |              |
| N  | 6.319797039  | 3.535132170  | 14.202993393 | N  | 12.826230049 | 3.283381462  | 16.692832947 |    |              |              |              |
| N  | 7.577123165  | 3.402415037  | 13.904778481 | N  | 13.019951820 | 3.747014999  | 17.685016632 |    |              |              |              |

| Structure L <sub>3</sub> |              |              |              | Structure M <sub>3</sub> |              |              | Structure N <sub>3</sub> |    |              |              |              |
|--------------------------|--------------|--------------|--------------|--------------------------|--------------|--------------|--------------------------|----|--------------|--------------|--------------|
| Si                       | 0.104605019  | 2.550107956  | 8.192484856  | Si                       | 0.108420491  | 2.546256065  | 8.214594841              | Si | 0.104440629  | 2.460304260  | 8.217523575  |
| Si                       | 7.913595200  | 0.754342437  | 3.136844397  | Si                       | 7.924632549  | 0.740783334  | 3.156725407              | Si | 7.922233582  | 0.681206644  | 3.138204575  |
| Si                       | 2.389058352  | 8.248433113  | 0.917341530  | Si                       | 2.397218704  | 8.249074936  | 0.925772071              | Si | 2.384022474  | 8.159785271  | 0.906214118  |
| Si                       | 5.507019997  | 8.377182007  | 1.175634623  | Si                       | 5.524250507  | 8.374043465  | 1.165462136              | Si | 5.543776512  | 8.312687874  | 1.152588487  |
| Si                       | 7.882280827  | 0.705327570  | 6.255676746  | Si                       | 7.891015053  | 0.701138854  | 6.276968956              | Si | 7.873079300  | 0.635094881  | 6.256413460  |
| Si                       | 0.079226911  | 5.717811584  | 8.340195656  | Si                       | 0.062484920  | 5.718540668  | 8.350122452              | Si | 0.077938378  | 5.629657745  | 8.367630005  |
| Si                       | 0.126328915  | 8.003076553  | 6.219720840  | Si                       | 0.119958401  | 7.996495724  | 6.227274418              | Si | 0.173287690  | 7.929144859  | 6.254443645  |
| Si                       | 5.565639019  | 0.483194649  | 8.402321815  | Si                       | 5.567082405  | 0.472697973  | 8.436543465              | Si | 5.577905655  | 0.422677875  | 8.415410042  |
| Si                       | 2.428722382  | 0.426032603  | 8.200306892  | Si                       | 2.430171013  | 0.421072900  | 8.204385757              | Si | 2.448785782  | 0.352359116  | 8.219318390  |
| Si                       | 0.118788183  | 8.099061012  | 3.129924774  | Si                       | 0.125249296  | 8.108123779  | 3.136173248              | Si | 0.145603150  | 7.990460396  | 3.149033546  |
| Si                       | 7.925429821  | 3.041956186  | 0.978280365  | Si                       | 7.932518959  | 3.034456015  | 1.007634521              | Si | 7.917084694  | 2.986909151  | 0.969985068  |
| Si                       | 9.557567596  | 2.544542074  | 8.168691635  | Si                       | 9.534523964  | 2.525597095  | 8.187381744              | Si | 9.546789169  | 2.470632076  | 8.175827980  |
| Si                       | 17.368330002 | 0.788565993  | 3.126799345  | Si                       | 17.384098053 | 0.792169273  | 3.135389805              | Si | 17.421115875 | 0.698693395  | 3.135467052  |
| Si                       | 11.765331268 | 8.219261169  | 0.982942760  | Si                       | 11.780287743 | 8.257873535  | 1.007609606              | Si | 11.781583786 | 8.186350822  | 0.989115357  |
| Si                       | 14.874201775 | 8.449486732  | 1.190702915  | Si                       | 14.888698578 | 8.457781792  | 1.189872384              | Si | 14.899641037 | 8.376477242  | 1.191596150  |
| Si                       | 17.304447174 | 0.706853628  | 6.236420155  | Si                       | 17.297409058 | 0.699894905  | 6.250226021              | Si | 17.334671021 | 0.611620724  | 6.264529228  |
| Si                       | 9.473125458  | 5.655033112  | 8.370860100  | Si                       | 9.469104767  | 5.676301003  | 8.429161072              | Si | 9.492481232  | 5.626323223  | 8.384479523  |
| Si                       | 9.510458946  | 7.978103638  | 6.256465912  | Si                       | 9.505035400  | 7.968449593  | 6.294152260              | Si | 9.518699646  | 7.919062614  | 6.251110077  |
| Si                       | 14.971335411 | 0.527348101  | 8.340258598  | Si                       | 14.979101181 | 0.503591418  | 8.356349945              | Si | 14.990642548 | 0.422044575  | 8.353934288  |
| Si                       | 11.842427254 | 0.396802306  | 8.200941086  | Si                       | 11.834770203 | 0.406474352  | 8.229012489              | Si | 11.845814705 | 0.340462804  | 8.188694000  |
| Si                       | 9.522578239  | 8.038713455  | 3.153303146  | Si                       | 9.536838531  | 8.028582573  | 3.189637661              | Si | 9.526733398  | 7.999070168  | 3.159416199  |
| Si                       | 17.317737579 | 3.070329666  | 0.933319747  | Si                       | 17.326133728 | 3.081279516  | 0.943937242              | Si | 17.351345062 | 2.985052824  | 0.973769009  |
| Si                       | -0.594515622 | 1.807162285  | 17.541292191 | Si                       | -0.585830510 | 1.817362309  | 17.554096222             | Si | -0.587541223 | 1.724331737  | 17.570232391 |
| Si                       | 7.251903534  | -0.037094593 | 12.488663673 | Si                       | 7.243990421  | -0.008111835 | 12.493218422             | Si | 7.225028992  | -0.052745521 | 12.489949226 |
| Si                       | 1.700660229  | 7.519880772  | 10.307333946 | Si                       | 1.699034691  | 7.523653030  | 10.316901207             | Si | 1.696116924  | 7.431211472  | 10.327787399 |
| Si                       | 4.826109886  | 7.611827850  | 10.553157806 | Si                       | 4.827298164  | 7.626379490  | 10.584914207             | Si | 4.816706657  | 7.576155186  | 10.581331253 |
| Si                       | 7.220339298  | -0.100099564 | 15.626826286 | Si                       | 7.209914207  | -0.048882484 | 15.640021324             | Si | 7.198326111  | -0.097235203 | 15.625202179 |
| Si                       | -0.597193301 | 4.970397949  | 17.713695526 | Si                       | -0.591538787 | 4.974315166  | 17.719554901             | Si | -0.590886414 | 4.888847351  | 17.731275558 |
| Si                       | -0.562357664 | 7.273183346  | 15.579898834 | Si                       | -0.554331303 | 7.281013012  | 15.587851524             | Si | -0.575070381 | 7.196400166  | 15.593852997 |
| Si                       | 4.865783215  | -0.224966168 | 17.737857819 | Si                       | 4.871921062  | -0.229857326 | 17.756513596             | Si | 4.882214069  | -0.287253380 | 17.746923447 |
| Si                       | 1.734798074  | -0.306398153 | 17.525167465 | Si                       | 1.738076448  | -0.308034301 | 17.534646988             | Si | 1.707108736  | -0.399741411 | 17.548276901 |
| Si                       | -0.583455443 | 7.353531361  | 12.490766525 | Si                       | -0.582549512 | 7.347455978  | 12.493947983             | Si | -0.581718802 | 7.268752098  | 12.501933098 |
| Si                       | 7.275879383  | 2.265630484  | 10.353027344 | Si                       | 7.245332718  | 2.276344299  | 10.364582062             | Si | 7.292398930  | 2.219392538  | 10.342371941 |
| Si                       | 8.856800079  | 1.743094683  | 17.598983765 | Si                       | 8.842913628  | 1.781840801  | 17.602264404             | Si | 8.842717171  | 1.725054860  | 17.585966110 |
| Si                       | 16.677549362 | 0.042428374  | 12.485106468 | Si                       | 16.681400299 | 0.043585181  | 12.498675346             | Si | 16.673486710 | -0.027536690 | 12.509426117 |
| Si                       | 11.084682465 | 7.488904476  | 10.331197739 | Si                       | 11.082380295 | 7.496092796  | 10.347782135             | Si | 11.074320793 | 7.439417839  | 10.310041428 |
| Si                       | 14.185690880 | 7.707428455  | 10.534853935 | Si                       | 14.181012154 | 7.703799248  | 10.567331314             | Si | 14.176484108 | 7.639008522  | 10.559414864 |
| Si                       | 16.605258942 | -0.037469983 | 15.595721245 | Si                       | 16.611005783 | -0.024494648 | 15.609790802             | Si | 16.600374222 | -0.121887207 | 15.622589111 |
| Si                       | 8.772472382  | 4.906795025  | 17.752283096 | Si                       | 8.787469864  | 4.938913345  | 17.771356583             | Si | 8.796518326  | 4.887957573  | 17.769227982 |
| Si                       | 8.846202850  | 7.199742317  | 15.618199348 | Si                       | 8.840339661  | 7.236356258  | 15.650095940             | Si | 8.851045609  | 7.196942329  | 15.635123253 |
| Si                       | 14.286140442 | -0.222467303 | 17.716499329 | Si                       | 14.289334297 | -0.203349829 | 17.721082687             | Si | 14.299715996 | -0.306562066 | 17.743892670 |
| Si                       | 11.156394005 | -0.351910830 | 17.572351456 | Si                       | 11.159038544 | -0.328486562 | 17.610992432             | Si | 11.156642914 | -0.380030870 | 17.599130630 |
| Si                       | 8.863281250  | 7.186823845  | 12.507374763 | Si                       | 8.849188805  | 7.194577694  | 12.535230637             | Si | 8.830671310  | 7.143714905  | 12.528343201 |

|    |              |              |              |    |              |              |              |    |              |              |              |
|----|--------------|--------------|--------------|----|--------------|--------------|--------------|----|--------------|--------------|--------------|
| Si | 16.626203537 | 2.327907801  | 10.300045013 | Si | 16.649007797 | 2.319614887  | 10.313819885 | Si | 16.638065338 | 2.236875534  | 10.321966171 |
| Al | 7.832811832  | 6.229660034  | 1.170204043  | Al | 7.841658115  | 6.213871479  | 1.217088580  | Al | 7.822649002  | 6.171882153  | 1.196959615  |
| Al | 17.379974365 | 6.207611561  | 1.183429480  | Al | 17.379098892 | 6.214328289  | 1.188275695  | Al | 17.394701004 | 6.125330925  | 1.214663744  |
| Al | 7.161326885  | 5.439193249  | 10.549353600 | Al | 7.164894581  | 5.433416367  | 10.638277054 | Al | 7.173069954  | 5.400161266  | 10.575254440 |
| Al | 16.670982361 | 5.465791702  | 10.524189949 | Al | 16.653373718 | 5.460571289  | 10.526735306 | Al | 16.665897369 | 5.386452198  | 10.518906593 |
| O  | 1.556502342  | 1.799502611  | 8.318222046  | O  | 1.562913179  | 1.799366951  | 8.317140579  | O  | 1.551064730  | 1.708770037  | 8.327721596  |
| O  | 0.004258037  | 0.131827980  | 3.053004742  | O  | 0.026464656  | 0.150402889  | 3.053274155  | O  | 0.052533299  | 0.034876361  | 3.026734591  |
| O  | 7.988092422  | 2.159753799  | 2.337602615  | O  | 8.028878212  | 2.150762320  | 2.362409592  | O  | 7.967956543  | 2.071455240  | 2.306997538  |
| O  | 2.887496948  | 0.273084581  | 0.121497631  | O  | 2.880355358  | 0.268398643  | 0.125603467  | O  | 2.760312319  | 0.168641016  | 0.119893327  |
| O  | 1.469494820  | 8.262639999  | 2.240931749  | O  | 1.482632399  | 8.259615898  | 2.251443386  | O  | 1.501649499  | 8.092655182  | 2.256060362  |
| O  | -0.064047918 | 3.006782532  | 0.173552796  | O  | -0.052442245 | 3.025467157  | 0.187669516  | O  | -0.032338545 | 2.921561480  | 0.216429263  |
| O  | 6.260962009  | 6.984851837  | 0.975455344  | O  | 6.273659229  | 6.972917557  | 0.980976701  | O  | 6.233247280  | 6.881287098  | 0.952649355  |
| O  | 8.057126999  | 8.725201607  | 6.390228748  | O  | 8.045767784  | 8.707512856  | 6.411940575  | O  | 8.063973427  | 8.660130501  | 6.377676964  |
| O  | 6.473610878  | 0.519394934  | 7.063548088  | O  | 6.496109009  | 0.542055309  | 7.111553192  | O  | 6.465663433  | 0.415138721  | 7.057045937  |
| O  | 8.044283867  | 5.679707050  | 9.080323219  | O  | 8.083146095  | 5.808285713  | 9.201841354  | O  | 8.114309311  | 5.790783882  | 9.176298141  |
| O  | 0.075650811  | 6.545553207  | 6.932901382  | O  | 0.071519673  | 6.537075043  | 6.936318874  | O  | 0.133655310  | 6.474000931  | 6.972834587  |
| O  | 5.002554417  | 8.437759399  | 9.143288612  | O  | 5.002683163  | 8.412690163  | 9.154613495  | O  | 5.001929283  | 8.375309944  | 9.165478706  |
| O  | 1.290968895  | 6.310205460  | 9.295418739  | O  | 1.272757649  | 6.319726944  | 9.305925369  | O  | 1.273878336  | 6.187285900  | 9.364710808  |
| O  | 18.112478256 | 1.960963726  | 6.912076473  | O  | 18.097648621 | 1.947708368  | 6.948307991  | O  | 18.101121902 | 1.893193960  | 6.932793140  |
| O  | 6.742644787  | -0.145618170 | 2.433882713  | O  | 6.761792660  | -0.144131839 | 2.417004824  | O  | 6.100933552  | 9.116958618  | 2.454290628  |
| O  | 6.047540665  | 1.638575673  | 9.456729889  | O  | 5.982836246  | 1.610915184  | 9.526508331  | O  | 6.091464043  | 1.575398445  | 9.438367844  |
| O  | 18.028547287 | 6.910058975  | 2.600752354  | O  | 18.026350021 | 6.932472706  | 2.594131231  | O  | 18.024080276 | 6.811356068  | 2.649645567  |
| O  | 1.948610783  | -0.459324270 | 6.934636593  | O  | 1.936941862  | -0.466316193 | 6.946629524  | O  | 2.013900280  | -0.528778553 | 6.930071354  |
| O  | 0.558443785  | 7.823086739  | 4.673055649  | O  | 0.551360786  | 7.816398144  | 4.678312302  | O  | 0.570111036  | 7.742836475  | 4.699841499  |
| O  | 4.003221512  | 0.810995936  | 8.041636467  | O  | 4.006233692  | 0.770783663  | 8.035219193  | O  | 4.016839504  | 0.753515720  | 8.067214012  |
| O  | 7.519398689  | 4.536943913  | 1.291539073  | O  | 7.512172222  | 4.525862217  | 1.323852301  | O  | 7.536366463  | 4.479220390  | 1.324665546  |
| O  | 7.519492149  | 1.015696883  | 4.700204372  | O  | 7.503565788  | 0.977180362  | 4.713793755  | O  | 7.520479679  | 0.956842899  | 4.698615074  |
| O  | 3.922164917  | 8.085800171  | 1.395276666  | O  | 3.936230659  | 8.094313622  | 1.387394428  | O  | 3.940210342  | 8.109057426  | 1.323400736  |
| O  | 0.399173796  | 4.140430450  | 8.013319016  | O  | 0.387035966  | 4.139508247  | 8.031964302  | O  | 0.387439847  | 4.052135468  | 8.044168472  |
| O  | 10.980134010 | 1.764229178  | 8.337491035  | O  | 10.984216690 | 1.783440232  | 8.342257500  | O  | 10.997735977 | 1.723640442  | 8.277841568  |
| O  | 9.371685982  | 0.047393784  | 3.057554960  | O  | 9.380697250  | 0.031452388  | 3.073932171  | O  | 9.406622887  | 0.025784999  | 3.075191975  |
| O  | 17.379707336 | 2.172719479  | 2.293272257  | O  | 17.379510880 | 2.172436714  | 2.294599295  | O  | 17.428487778 | 2.107051611  | 2.343915224  |
| O  | 12.349792480 | 0.246454895  | 0.193396136  | O  | 12.369898796 | 0.313442081  | 0.260474354  | O  | 12.322780609 | 0.226164728  | 0.223678529  |
| O  | 10.932422638 | 8.291055679  | 2.354499340  | O  | 10.939463615 | 8.279057503  | 2.371178865  | O  | 10.937321663 | 8.216303825  | 2.351596594  |
| O  | 9.360941887  | 2.884292603  | 0.194898278  | O  | 9.370659828  | 2.921327114  | 0.209569737  | O  | 9.359184265  | 2.855425835  | 0.183137938  |
| O  | 15.641170502 | 6.932109356  | 1.003596544  | O  | 15.651108742 | 6.944665909  | 0.977423370  | O  | 15.647178650 | 6.845116138  | 1.043814778  |
| O  | 17.510385513 | 8.741833687  | 6.335348129  | O  | 17.505374908 | 8.735952377  | 6.338175297  | O  | 17.557916641 | 8.662712097  | 6.410709858  |
| O  | 15.888565063 | 0.447869301  | 7.004626274  | O  | 15.875334740 | 0.426962018  | 7.001292706  | O  | 15.907752037 | 0.357102215  | 7.017561913  |
| O  | 17.508913040 | 5.886470795  | 9.084524155  | O  | 17.483926773 | 5.890017986  | 9.081399918  | O  | 17.483182907 | 5.811718941  | 9.067225456  |
| O  | 9.467355728  | 6.540678978  | 7.001374722  | O  | 9.462322235  | 6.527096748  | 7.027945518  | O  | 9.478552818  | 6.479575157  | 6.993667603  |
| O  | 14.427370071 | 8.495143890  | 9.147765160  | O  | 14.445727348 | 8.475388527  | 9.173975945  | O  | 14.443490028 | 8.382307053  | 9.152471542  |
| O  | 10.669489861 | 6.268385410  | 9.343592644  | O  | 10.724072456 | 6.274772644  | 9.339781761  | O  | 10.749708176 | 6.205009937  | 9.303301811  |
| O  | 8.729524612  | 1.954534888  | 6.888121128  | O  | 8.766960144  | 1.955901265  | 6.852458000  | O  | 8.700300217  | 1.897198200  | 6.897324562  |
| O  | 15.559514046 | 9.166450500  | 2.458635330  | O  | 15.595679283 | 9.153630257  | 2.454734325  | O  | 15.600516319 | 9.110969543  | 2.437751293  |



|   |              |              |              |   |              |              |              |   |              |              |              |
|---|--------------|--------------|--------------|---|--------------|--------------|--------------|---|--------------|--------------|--------------|
| O | 15.478666306 | 1.724962234  | 9.303884506  | O | 15.532453537 | 1.695643663  | 9.301545143  | O | 15.495929718 | 1.599911928  | 9.341190338  |
| O | 8.702632904  | 6.822486401  | 2.536075354  | O | 8.722969055  | 6.809497356  | 2.566973686  | O | 8.666853905  | 6.804862499  | 2.555425167  |
| O | 11.351646423 | -0.469554335 | 6.925661564  | O | 11.337164879 | -0.468025863 | 6.958866119  | O | 11.365615845 | -0.536590099 | 6.917685986  |
| O | 9.917906761  | 7.755671501  | 4.708693027  | O | 9.927748680  | 7.754644394  | 4.743325710  | O | 9.937404633  | 7.707201958  | 4.707189083  |
| O | 13.413700104 | 0.780421972  | 7.972909451  | O | 13.418179512 | 0.761245787  | 8.009777069  | O | 13.431915283 | 0.676386952  | 7.989522457  |
| O | 16.899255753 | 4.565668106  | 1.305770755  | O | 16.904247284 | 4.572565079  | 1.320125818  | O | 16.912237167 | 4.482000351  | 1.316854715  |
| O | 16.957746506 | 1.059321880  | 4.680567265  | O | 16.968791962 | 1.060867429  | 4.687419891  | O | 17.014688492 | 0.927959323  | 4.695579052  |
| O | 13.343662262 | 8.007925034  | 1.414629579  | O | 13.355420113 | 8.029214859  | 1.422570944  | O | 13.356934547 | 7.985047817  | 1.425923944  |
| O | 9.893560410  | 4.119046688  | 7.970754147  | O | 9.816141129  | 4.116184235  | 8.050004005  | O | 9.821176529  | 4.062151432  | 8.016929626  |
| O | 0.865172863  | 1.066878796  | 17.656427383 | O | 0.868320942  | 1.065039158  | 17.657075882 | O | 0.876075029  | 0.999148011  | 17.670940399 |
| O | -0.672467411 | -0.597118795 | 12.427310944 | O | -0.671935499 | -0.604358435 | 12.442372322 | O | -0.689506531 | -0.693295717 | 12.435133934 |
| O | 7.443615913  | 1.373958111  | 11.711169243 | O | 7.441312313  | 1.402597547  | 11.739827156 | O | 7.439679146  | 1.362404227  | 11.733929634 |
| O | 2.208871126  | -0.402839154 | 9.599434853  | O | 2.202445507  | -0.394504160 | 9.614585876  | O | 2.209516048  | -0.514760673 | 9.589227676  |
| O | 0.804700911  | 7.533407688  | 11.659002304 | O | 0.815324068  | 7.544426918  | 11.680843353 | O | 0.821031868  | 7.478385925  | 11.697189331 |
| O | -0.747481346 | 2.261513233  | 9.560330391  | O | -0.706671655 | 2.258528471  | 9.605957985  | O | -0.735264480 | 2.148369789  | 9.58989526   |
| O | 5.621206284  | 6.241997719  | 10.520846367 | O | 5.637532234  | 6.276330471  | 10.634615898 | O | 5.637846947  | 6.218593597  | 10.622079849 |
| O | 7.344528675  | 7.879487991  | 15.733227730 | O | 7.359175682  | 7.951497078  | 15.805926323 | O | 7.368607044  | 7.908422470  | 15.737863541 |
| O | 5.759221077  | -0.280545950 | 16.363828659 | O | 5.747178555  | -0.251159906 | 16.370592117 | O | 5.757636070  | -0.328252852 | 16.362491608 |
| O | 7.306899548  | 5.068066120  | 18.387577057 | O | 7.331344604  | 5.043815613  | 18.435773849 | O | 7.346670151  | 5.036366463  | 18.444278717 |
| O | -0.590350747 | 5.833633423  | 16.324680328 | O | -0.583663523 | 5.842091560  | 16.334394455 | O | -0.581806362 | 5.761377335  | 16.348060608 |
| O | 4.281039238  | 7.726317883  | 18.476947784 | O | 4.305360794  | 7.703805447  | 18.456329346 | O | 4.441547871  | 7.692033768  | 18.502059937 |
| O | 0.649594545  | 5.512786865  | 18.651418686 | O | 0.658568382  | 5.509254456  | 18.659994125 | O | 0.682123542  | 5.403071404  | 18.647773743 |
| O | 17.416992188 | 1.223089099  | 16.253381729 | O | 17.416744232 | 1.238045931  | 16.272047043 | O | 17.407749176 | 1.128499866  | 16.299489975 |
| O | 5.967549324  | -0.821367204 | 11.833599091 | O | 5.925205231  | -0.763759017 | 11.855810165 | O | 5.918142796  | -0.814912319 | 11.847343445 |
| O | 5.354754925  | 0.969319105  | 18.711229324 | O | 6.747765541  | 2.430683613  | 0.014382907  | O | 5.352634430  | 0.962737799  | 18.670309067 |
| O | 17.325971603 | 6.185267448  | 11.931621552 | O | 17.345315933 | 6.169572830  | 11.929440498 | O | 17.350368500 | 6.091570377  | 11.921750069 |
| O | 1.283657432  | -1.146998405 | 16.206676483 | O | 1.309266925  | -1.151606441 | 16.208877563 | O | 1.259705663  | -1.200110197 | 16.200466156 |
| O | -0.148738384 | 7.055023670  | 14.031847954 | O | -0.148321867 | 7.054575920  | 14.040081978 | O | -0.168339670 | 6.956397533  | 14.045120239 |
| O | 3.312276363  | 0.090306640  | 17.318775177 | O | 3.315486431  | 0.099762678  | 17.353668213 | O | 3.298846245  | -0.085614324 | 17.417121887 |
| O | 6.783732414  | 3.726572275  | 10.833898544 | O | 6.805538177  | 3.742187023  | 10.756306648 | O | 6.824863434  | 3.697444677  | 10.735973358 |
| O | 6.886797905  | 0.249353409  | 14.064615250 | O | 6.878969193  | 0.262490034  | 14.078125954 | O | 6.868173122  | 0.241224766  | 14.063118935 |
| O | 3.232537031  | 7.344557285  | 10.797161102 | O | 3.227324486  | 7.355895042  | 10.814032555 | O | 3.232346773  | 7.244113445  | 10.814450264 |
| O | -0.284387469 | 3.396161318  | 17.353445053 | O | -0.256679416 | 3.404261112  | 17.356481552 | O | -0.308533728 | 3.315039873  | 17.353565216 |
| O | 10.318304062 | 1.029057741  | 17.729976654 | O | 10.302474022 | 1.051555634  | 17.692054749 | O | 10.301211357 | 0.999628544  | 17.702514648 |
| O | 8.625024796  | -0.862622380 | 12.381429672 | O | 8.596754074  | -0.865664184 | 12.377868652 | O | 8.578672409  | -0.921622097 | 12.377744675 |
| O | 16.688438416 | 1.431081533  | 11.662796974 | O | 16.702383041 | 1.437822342  | 11.688293457 | O | 16.698818207 | 1.373149633  | 11.707876205 |
| O | 11.668296814 | -0.464406133 | 9.578995705  | O | 11.654912949 | -0.450926304 | 9.606920242  | O | 11.627402306 | -0.506687403 | 9.574326515  |
| O | 10.248114586 | 7.522985458  | 11.707417488 | O | 10.221042633 | 7.512058735  | 11.709573746 | O | 10.171617508 | 7.422607899  | 11.648990631 |
| O | 8.670104980  | 2.285578489  | 9.522721291  | O | 8.614588737  | 2.148526192  | 9.482650757  | O | 8.717443466  | 2.150899887  | 9.549764633  |
| O | 14.935930252 | 6.182160378  | 10.347732544 | O | 14.909298897 | 6.164069653  | 10.408624649 | O | 14.911469460 | 6.097905159  | 10.417752266 |
| O | 16.819988251 | 8.001984596  | 15.701013565 | O | 16.839113235 | 8.025732040  | 15.730639458 | O | 16.796321869 | 7.905193329  | 15.720863342 |
| O | 15.197857857 | -0.300732613 | 16.374769211 | O | 15.194767952 | -0.290614009 | 16.375968933 | O | 15.181726456 | -0.367282927 | 16.384723663 |
| O | 16.840307236 | 5.138228416  | 18.469686508 | O | 16.847381592 | 5.130347729  | 18.472417831 | O | 16.858434677 | 5.074793816  | 18.505914688 |
| O | 8.838047028  | 5.754232883  | 16.351121902 | O | 8.795703888  | 5.769877434  | 16.358171463 | O | 8.811379433  | 5.749384403  | 16.371198654 |

|     |              |              |              |                          |              |              |              |                          |              |              |              |
|-----|--------------|--------------|--------------|--------------------------|--------------|--------------|--------------|--------------------------|--------------|--------------|--------------|
| O   | 13.745252609 | 7.755484104  | 18.537927628 | O                        | 13.733896255 | 7.772953987  | 18.534696579 | O                        | 13.763567924 | 7.643961430  | 18.514556885 |
| O   | 11.329640388 | 6.974044800  | 0.023739668  | O                        | 11.352172852 | 7.044917107  | 0.000156225  | O                        | 11.385935783 | 6.944686413  | 0.001342722  |
| O   | 8.077894211  | 1.108273625  | 16.296108246 | O                        | 8.012574196  | 1.209329844  | 16.302673340 | O                        | 8.022067070  | 1.163679838  | 16.266530991 |
| O   | 14.895695686 | 8.409222603  | 11.798962593 | O                        | 14.897284508 | 8.416067123  | 11.826172829 | O                        | 14.871226311 | 8.368090630  | 11.815091133 |
| O   | 14.786410332 | 0.984328508  | 18.669164658 | O                        | 14.803276062 | 1.000881791  | 18.665500641 | O                        | 14.829406738 | 0.863384604  | 18.722560883 |
| O   | 8.105706215  | 5.911451340  | 11.934323311 | O                        | 8.091431618  | 5.883331776  | 12.059364319 | O                        | 8.046489716  | 5.819594860  | 12.059995651 |
| O   | 10.635812759 | -1.202708125 | 16.292991638 | O                        | 10.650863647 | -1.222965479 | 16.364892960 | O                        | 10.658093452 | -1.227635026 | 16.307117462 |
| O   | 9.262773514  | 6.992671490  | 14.075842857 | O                        | 9.274453163  | 7.077187061  | 14.113232613 | O                        | 9.275527000  | 6.986261845  | 14.089293480 |
| O   | 12.728207588 | 0.013253570  | 17.333265305 | O                        | 12.724517822 | 0.077883363  | 17.352899551 | O                        | 12.736646652 | -0.035747170 | 17.397542953 |
| O   | 16.207748413 | 3.822360039  | 10.676032066 | O                        | 16.219120026 | 3.810013771  | 10.689171791 | O                        | 16.213996887 | 3.739213228  | 10.663961411 |
| O   | 16.250377655 | 0.297742009  | 14.037199974 | O                        | 16.267765045 | 0.317503333  | 14.053420067 | O                        | 16.254501343 | 0.217868924  | 14.065053940 |
| O   | 12.657505035 | 7.278641701  | 10.783378601 | O                        | 12.650051117 | 7.313591957  | 10.827795982 | O                        | 12.633930206 | 7.266750336  | 10.814803123 |
| O   | 9.114677429  | 3.337862492  | 17.412433624 | O                        | 9.151451111  | 3.373723507  | 17.414445877 | O                        | 9.113996506  | 3.320111275  | 17.394720078 |
| O   | 3.215623140  | 3.146225929  | 14.798506737 | O                        | 3.427222967  | 3.067137241  | 14.761112213 | O                        | 3.596163273  | 2.309878588  | 15.354349136 |
| O   | 5.664972305  | 3.482437134  | 13.126793861 | O                        | 12.515375137 | 3.452692032  | 16.222055435 | O                        | 6.767151833  | 4.289987564  | 13.979727745 |
| O   | 6.455033779  | 3.284475327  | 15.162187576 | O                        | 13.734379768 | 3.610744953  | 13.460377693 | Cu                       | 3.914507389  | 2.560393095  | 13.635068893 |
| Cu  | 3.721604109  | 2.379789591  | 13.263833046 | Cu                       | 3.571627378  | 2.063477516  | 13.319851875 | Cu                       | 4.278452396  | 3.713743210  | 16.170829773 |
| Cu  | 3.776339769  | 3.803254366  | 16.328441620 | Cu                       | 3.857652426  | 3.701711655  | 16.350690842 | H                        | 15.010210037 | 6.109336853  | 0.957379341  |
| H   | 15.003441811 | 6.197297096  | 0.910215497  | H                        | 15.036555290 | 6.247824192  | 0.671629071  | H                        | 3.408908367  | 0.248468757  | 14.166921616 |
| H   | 3.983262062  | 0.268902183  | 14.670001984 | H                        | 4.100024223  | -0.020720601 | 14.622474670 | H                        | 2.703947544  | 0.469679117  | 12.684691429 |
| H   | 2.778178215  | -0.033652186 | 13.590834618 | H                        | 2.866487026  | -0.389732122 | 13.582216263 | H                        | 4.327443600  | 0.134398222  | 12.778264046 |
| H   | 4.356221199  | -0.159356654 | 13.116196632 | H                        | 4.430730343  | -0.330954373 | 13.026467323 | H                        | 3.925993919  | 4.466927052  | 11.947963715 |
| H   | 3.224733829  | 3.217524529  | 10.890178680 | H                        | 3.100667477  | 3.023732185  | 11.012731552 | H                        | 5.204463959  | 3.503468752  | 11.637072563 |
| H   | 4.387077332  | 2.079644918  | 10.745651245 | H                        | 4.366197109  | 1.996659756  | 10.875340462 | H                        | 3.699684620  | 3.068273783  | 11.135834694 |
| H   | 2.823121548  | 1.627862215  | 10.967589378 | H                        | 2.831878901  | 1.401247621  | 10.956647873 | H                        | 14.266861916 | 5.369183064  | 10.329804420 |
| H   | 14.291118622 | 5.455368996  | 10.243987083 | H                        | 14.264043808 | 5.438425064  | 10.538347244 | H                        | 3.862481117  | 4.164768219  | 18.639457703 |
| H   | 5.128530979  | 5.646790981  | 0.134002000  | H                        | 5.182055473  | 5.694509029  | 0.122453101  | H                        | 2.542880774  | 3.358675480  | 17.953704834 |
| H   | 2.408609867  | 3.286834717  | 18.381021500 | H                        | 2.320880413  | 3.619171143  | 18.362108231 | H                        | 3.943548679  | 2.532808304  | 18.310083389 |
| H   | 3.892028332  | 2.560199261  | 18.512786865 | H                        | 3.608353138  | 2.593350887  | 18.569791794 | H                        | 5.990530968  | 5.270224571  | 15.470793724 |
| H   | 5.264931202  | 5.758432865  | 15.611602783 | H                        | 5.606723785  | 5.361957550  | 15.552659988 | H                        | 4.913041115  | 6.194468975  | 16.367113113 |
| H   | 4.543894291  | 6.175860882  | 17.031986237 | H                        | 4.768708229  | 6.028959274  | 16.809148788 | H                        | 6.034473896  | 5.263978004  | 17.133272171 |
| H   | 5.833703041  | 5.183265209  | 17.052177429 | H                        | 5.991107941  | 4.999567032  | 17.127098083 | H                        | 7.365206242  | 3.569932938  | 14.246615410 |
| H   | 6.125610828  | 3.626958847  | 12.205091476 | H                        | 11.612767220 | 3.795893669  | 16.090856552 | H                        | 7.280697346  | 4.806294918  | 13.301043510 |
| N   | 3.704923630  | 0.388148308  | 13.692158699 | H                        | 12.373072624 | 2.538244963  | 16.531232834 | N                        | 3.552623749  | 0.640196681  | 13.230881691 |
| N   | 3.527677059  | 2.312307358  | 11.262356758 | H                        | 14.642552376 | 3.264352083  | 13.480734825 | N                        | 4.203300953  | 3.479445934  | 11.926898956 |
| N   | 3.410953999  | 3.421866655  | 18.229587555 | H                        | 13.413383484 | 3.540912867  | 14.386128426 | N                        | 3.563374519  | 3.426666737  | 17.974842072 |
| N   | 4.970417023  | 5.394895554  | 16.520320892 | N                        | 3.754469395  | 0.113979459  | 13.667332649 | N                        | 5.393759727  | 5.293765068  | 16.316913605 |
| N   | 6.779417992  | 3.540104151  | 14.047323227 | N                        | 3.454376698  | 2.121037483  | 11.343699455 |                          |              |              |              |
|     |              |              |              | N                        | 3.332720757  | 3.522769928  | 18.235044479 |                          |              |              |              |
|     |              |              |              | N                        | 5.201184273  | 5.161599159  | 16.470314026 |                          |              |              |              |
|     |              |              |              | N                        | 10.582006454 | 3.135884047  | 12.070591927 |                          |              |              |              |
|     |              |              |              | N                        | 10.385725021 | 2.732090712  | 13.089303017 |                          |              |              |              |
| ts4 |              |              |              | Structure O <sub>3</sub> |              |              |              | Structure P <sub>3</sub> |              |              |              |
| Si  | 0.060432851  | 2.415743351  | 8.171847343  | Si                       | 0.056456923  | 2.422658205  | 8.162076950  | Si                       | 0.114696443  | 2.468727589  | 8.182585716  |

|    |              |              |              |    |              |              |              |    |              |              |              |
|----|--------------|--------------|--------------|----|--------------|--------------|--------------|----|--------------|--------------|--------------|
| Si | 7.884250164  | 0.645276129  | 3.117279768  | Si | 7.886362076  | 0.627020001  | 3.091408014  | Si | 7.931901455  | 0.723283291  | 3.105977058  |
| Si | 2.344583273  | 8.135099411  | 0.919717550  | Si | 2.355312824  | 8.143216133  | 0.892387927  | Si | 2.424883604  | 8.196546555  | 0.904668450  |
| Si | 5.433813572  | 8.262552261  | 1.198535442  | Si | 5.459913254  | 8.248765945  | 1.115795732  | Si | 5.511710167  | 8.326664925  | 1.136605024  |
| Si | 7.822302818  | 0.572852552  | 6.234505177  | Si | 7.826060295  | 0.585848451  | 6.213040829  | Si | 7.860537529  | 0.653152645  | 6.223788738  |
| Si | 0.003416598  | 5.586437225  | 8.306092262  | Si | 0.011240244  | 5.594453335  | 8.306500435  | Si | 0.061341703  | 5.640662193  | 8.305376053  |
| Si | 0.057297200  | 7.890104771  | 6.206182480  | Si | 0.074707091  | 7.884984016  | 6.193571091  | Si | 0.139259964  | 7.947826385  | 6.201116562  |
| Si | 5.505228043  | 0.325082660  | 8.369988441  | Si | 5.523194790  | 0.351325989  | 8.387103081  | Si | 5.574618340  | 0.393805981  | 8.387970924  |
| Si | 2.382217407  | 0.305277348  | 8.218965530  | Si | 2.374794245  | 0.307111681  | 8.198061943  | Si | 2.438155651  | 0.357910931  | 8.215163231  |
| Si | 0.045736313  | 7.981034279  | 3.125346184  | Si | 0.072596863  | 7.984876633  | 3.110681295  | Si | 0.126014963  | 8.040218353  | 3.109357595  |
| Si | 7.875452518  | 2.922379494  | 0.941192329  | Si | 7.879383564  | 2.934058666  | 0.942250133  | Si | 7.943994522  | 3.006068230  | 0.945806324  |
| Si | 9.478565216  | 2.407924414  | 8.171639442  | Si | 9.477032661  | 2.396991730  | 8.140545845  | Si | 9.526038170  | 2.488716125  | 8.148837090  |
| Si | 17.320032120 | 0.676205754  | 3.101714849  | Si | 17.335197449 | 0.675933540  | 3.095438242  | Si | 17.375539780 | 0.734485269  | 3.097322464  |
| Si | 11.717047691 | 8.132883072  | 0.933543801  | Si | 11.725058556 | 8.130131721  | 0.941976488  | Si | 11.781563759 | 8.195757866  | 0.932431221  |
| Si | 14.832246780 | 8.347063065  | 1.153491497  | Si | 14.844364166 | 8.340249062  | 1.142921209  | Si | 14.892510414 | 8.398731232  | 1.142660022  |
| Si | 17.262132645 | 0.594211698  | 6.206032753  | Si | 17.259901047 | 0.584392726  | 6.201572418  | Si | 17.321788788 | 0.638053894  | 6.207583427  |
| Si | 9.406831741  | 5.552699566  | 8.360883713  | Si | 9.419761658  | 5.575044632  | 8.373575211  | Si | 9.464817047  | 5.631284237  | 8.350779533  |
| Si | 9.456923485  | 7.840863705  | 6.229465485  | Si | 9.444247246  | 7.845434666  | 6.222523212  | Si | 9.520882607  | 7.928667545  | 6.211384773  |
| Si | 14.918535233 | 0.413708210  | 8.333111763  | Si | 14.925933838 | 0.397922814  | 8.317739487  | Si | 14.973586082 | 0.450791597  | 8.309293747  |
| Si | 11.779383659 | 0.277192116  | 8.173234940  | Si | 11.780943871 | 0.282468557  | 8.148110390  | Si | 11.843508720 | 0.356768787  | 8.142406464  |
| Si | 9.461328506  | 7.910248756  | 3.134811163  | Si | 9.475198746  | 7.917067528  | 3.120090485  | Si | 9.534432411  | 8.011036873  | 3.116848946  |
| Si | 17.261270523 | 2.960905552  | 0.915168941  | Si | 17.284286499 | 2.959381580  | 0.912021995  | Si | 17.329238892 | 3.017307997  | 0.910140991  |
| Si | -0.638187110 | 1.701717734  | 17.520933151 | Si | -0.630230606 | 1.705249786  | 17.508430481 | Si | -0.578164220 | 1.754514694  | 17.517448425 |
| Si | 7.124336243  | -0.148986042 | 12.455276489 | Si | 7.173717499  | -0.109658778 | 12.445099831 | Si | 7.196374416  | -0.059327960 | 12.441770554 |
| Si | 1.642653227  | 7.352695942  | 10.285087585 | Si | 1.640527725  | 7.380122185  | 10.268939018 | Si | 1.707958460  | 7.404892445  | 10.279767990 |
| Si | 4.745771885  | 7.485199928  | 10.535189629 | Si | 4.771814823  | 7.497869492  | 10.530916214 | Si | 4.817097187  | 7.567820549  | 10.553808212 |
| Si | 7.115782261  | -0.168567061 | 15.607431412 | Si | 7.149573326  | -0.148848534 | 15.577924728 | Si | 7.211692810  | -0.110671163 | 15.586790085 |
| Si | -0.633976102 | 4.867275715  | 17.713714600 | Si | -0.637968063 | 4.868686676  | 17.694004059 | Si | -0.565994442 | 4.917221069  | 17.699090958 |
| Si | -0.611984253 | 7.162070274  | 15.575865746 | Si | -0.606755435 | 7.164260387  | 15.561021805 | Si | -0.538036227 | 7.210618973  | 15.566229820 |
| Si | 4.795227051  | -0.336690903 | 17.719005585 | Si | 4.808629990  | -0.317031026 | 17.698280334 | Si | 4.865252495  | -0.260298967 | 17.703891754 |
| Si | 1.686710954  | -0.420340121 | 17.534198761 | Si | 1.694700599  | -0.404607117 | 17.509309769 | Si | 1.765698671  | -0.356092691 | 17.503477097 |
| Si | -0.635494053 | 7.218931198  | 12.487739563 | Si | -0.628118753 | 7.219987392  | 12.472551346 | Si | -0.576834559 | 7.261595726  | 12.462653160 |
| Si | 7.202253342  | 2.137586594  | 10.329034805 | Si | 7.215275764  | 2.151639462  | 10.307511330 | Si | 7.276339531  | 2.217948437  | 10.329031944 |
| Si | 8.774484634  | 1.646911860  | 17.549007416 | Si | 8.804509163  | 1.667422891  | 17.537841797 | Si | 8.851483345  | 1.720941424  | 17.540714264 |
| Si | 16.639169693 | -0.079843879 | 12.467604637 | Si | 16.651809692 | -0.078067601 | 12.456474304 | Si | 16.697975159 | -0.031781077 | 12.451489449 |
| Si | 11.007096291 | 7.389875889  | 10.292992592 | Si | 11.025103569 | 7.383913517  | 10.272503853 | Si | 11.071802139 | 7.456654549  | 10.278009415 |
| Si | 14.124774933 | 7.602404594  | 10.515194893 | Si | 14.135132790 | 7.598755360  | 10.512988091 | Si | 14.173239708 | 7.646264553  | 10.498358727 |
| Si | 16.572460175 | -0.132703424 | 15.578323364 | Si | 16.578815460 | -0.134714484 | 15.568006516 | Si | 16.634458542 | -0.093799710 | 15.575478554 |
| Si | 8.734817505  | 4.828693390  | 17.718685150 | Si | 8.739280701  | 4.821926117  | 17.696577072 | Si | 8.799714088  | 4.887957096  | 17.692884445 |
| Si | 8.776823997  | 7.113711357  | 15.590837479 | Si | 8.791230202  | 7.136032581  | 15.586936951 | Si | 8.855919838  | 7.189713478  | 15.574999809 |
| Si | 14.236572266 | -0.321446776 | 17.701091766 | Si | 14.254420280 | -0.325893402 | 17.697057724 | Si | 14.303132057 | -0.276811004 | 17.685922623 |
| Si | 11.095934868 | -0.455874503 | 17.560045242 | Si | 11.112008095 | -0.442377210 | 17.569158554 | Si | 11.168274879 | -0.382471561 | 17.538850784 |
| Si | 8.755808830  | 7.055777073  | 12.474450111 | Si | 8.771236420  | 7.101490498  | 12.480373383 | Si | 8.825441360  | 7.139856339  | 12.460900307 |
| Si | 16.566062927 | 2.201146126  | 10.289052963 | Si | 16.582695007 | 2.199765921  | 10.276689529 | Si | 16.632085800 | 2.247522593  | 10.286477089 |
| Al | 7.770233631  | 6.125752926  | 1.176232696  | Al | 7.770205975  | 6.111782551  | 1.132576823  | Al | 7.846866131  | 6.197506905  | 1.130818963  |

|    |              |              |              |    |              |              |              |    |              |              |              |
|----|--------------|--------------|--------------|----|--------------|--------------|--------------|----|--------------|--------------|--------------|
| Al | 17.322479248 | 6.100397587  | 1.190766096  | Al | 17.338298798 | 6.102617264  | 1.168218136  | Al | 17.398155212 | 6.155226707  | 1.164327502  |
| Al | 7.114832401  | 5.298393250  | 10.566184044 | Al | 7.126336098  | 5.342444897  | 10.572247505 | Al | 7.188706875  | 5.377821445  | 10.574520111 |
| Al | 16.604524612 | 5.348878860  | 10.514826775 | Al | 16.609722137 | 5.344579697  | 10.513302803 | Al | 16.655279160 | 5.397583008  | 10.492576599 |
| O  | 1.526228666  | 1.697259545  | 8.389514923  | O  | 1.514812350  | 1.691114783  | 8.313226700  | O  | 1.566168070  | 1.733154178  | 8.360699654  |
| O  | -0.040521920 | 0.027692944  | 3.049264908  | O  | -0.026185587 | 0.025675625  | 3.041207314  | O  | 0.004150152  | 0.066412777  | 3.026890278  |
| O  | 7.944998741  | 2.047008276  | 2.309312105  | O  | 7.960084438  | 2.031101227  | 2.287105083  | O  | 8.006422043  | 2.137528896  | 2.315480471  |
| O  | 2.852322102  | 0.173962340  | 0.146355808  | O  | 2.883988380  | 0.188341662  | 0.118811488  | O  | 2.985732794  | 0.234895229  | 0.114628874  |
| O  | 1.369285941  | 8.106257439  | 2.200750828  | O  | 1.403420568  | 8.130640030  | 2.191478491  | O  | 1.452788830  | 8.218683243  | 2.188366890  |
| O  | -0.140771970 | 2.884323120  | 0.124467649  | O  | -0.117764764 | 2.879526615  | 0.120043211  | O  | -0.057783622 | 2.955021620  | 0.139510453  |
| O  | 6.194093704  | 6.875941753  | 0.944950223  | O  | 6.201444626  | 6.857357025  | 0.846812844  | O  | 6.283632278  | 6.953882694  | 0.875516653  |
| O  | 8.014250755  | 8.602771759  | 6.357339859  | O  | 7.998130798  | 8.602878571  | 6.352338791  | O  | 8.083238602  | 8.700817108  | 6.336760044  |
| O  | 6.406862736  | 0.332421243  | 7.023615360  | O  | 6.426379204  | 0.407257438  | 7.040381908  | O  | 6.452578068  | 0.410494328  | 7.020626545  |
| O  | 8.009549141  | 5.660178661  | 9.121436119  | O  | 8.053178787  | 5.781726837  | 9.170750618  | O  | 8.073603630  | 5.751581669  | 9.121137619  |
| O  | 0.005877316  | 6.422742367  | 6.904376030  | O  | 0.006010652  | 6.422590733  | 6.898268223  | O  | 0.086392105  | 6.483488560  | 6.906248093  |
| O  | 4.868610382  | 8.266396523  | 9.096608162  | O  | 4.982348919  | 8.290083885  | 9.108405113  | O  | 4.966655731  | 8.328737259  | 9.107241631  |
| O  | 1.228167772  | 6.159253597  | 9.255329132  | O  | 1.242413044  | 6.175769329  | 9.246335030  | O  | 1.273977518  | 6.202771664  | 9.272516251  |
| O  | 18.144184113 | 1.815003633  | 6.855122089  | O  | 18.091651917 | 1.826158166  | 6.869642735  | O  | 18.156185150 | 1.875526071  | 6.883062363  |
| O  | 6.030362129  | 9.112558365  | 2.448195457  | O  | 6.062185287  | 9.094255447  | 2.366465807  | O  | 6.107033730  | 9.204864502  | 2.364674568  |
| O  | 6.012073517  | 1.459161520  | 9.419534683  | O  | 5.960464954  | 1.505625486  | 9.451997757  | O  | 6.096674919  | 1.524346471  | 9.425649643  |
| O  | 17.908905029 | 6.811195850  | 2.633745909  | O  | 17.951547623 | 6.813039780  | 2.596955776  | O  | 18.033031464 | 6.845671654  | 2.592648983  |
| O  | 1.153594971  | 8.833570480  | 6.962415695  | O  | 1.182590723  | 8.822651863  | 6.937002659  | O  | 1.935750961  | -0.495717824 | 6.931857586  |
| O  | 0.522668540  | 7.727223873  | 4.666073799  | O  | 0.533627033  | 7.710960388  | 4.649693012  | O  | 0.581637681  | 7.777438641  | 4.652047157  |
| O  | 3.946555853  | 0.694603682  | 8.009434700  | O  | 3.953542233  | 0.652603209  | 8.025375366  | O  | 4.006785393  | 0.740577161  | 8.050650597  |
| O  | 7.495687962  | 4.427791119  | 1.239234090  | O  | 7.479961872  | 4.421781540  | 1.288856506  | O  | 7.546439171  | 4.505185604  | 1.249356866  |
| O  | 7.490576267  | 0.913877964  | 4.679879189  | O  | 7.467308998  | 0.883960605  | 4.649542332  | O  | 7.499138355  | 0.964308143  | 4.662193775  |
| O  | 3.853025913  | 7.972688198  | 1.476089358  | O  | 3.881009579  | 7.979300976  | 1.395610690  | O  | 3.940304279  | 8.010297775  | 1.431583166  |
| O  | 0.341307223  | 4.008543491  | 7.992137432  | O  | 0.330050707  | 4.016051292  | 7.986467838  | O  | 0.374874771  | 4.061719418  | 7.985930443  |
| O  | 10.925427437 | 1.653888226  | 8.270130157  | O  | 10.941232681 | 1.671289444  | 8.253750801  | O  | 10.970426559 | 1.721852779  | 8.242994308  |
| O  | 9.346396446  | -0.057934999 | 3.035084963  | O  | 9.357308388  | -0.054604009 | 3.034183264  | O  | 9.399049759  | 0.031415284  | 3.046617508  |
| O  | 17.349046707 | 2.056601524  | 2.267055988  | O  | 17.367292404 | 2.062977076  | 2.269153595  | O  | 17.402240753 | 2.123583555  | 2.270291805  |
| O  | 12.286470413 | 0.204445243  | 0.224599719  | O  | 12.294147491 | 0.193583772  | 0.216232508  | O  | 12.363956451 | 0.244234398  | 0.179282755  |
| O  | 10.853552818 | 8.101222038  | 2.286211014  | O  | 10.891271591 | 8.129821777  | 2.313640356  | O  | 10.942443848 | 8.241622925  | 2.300563574  |
| O  | 9.312660217  | 2.763355017  | 0.158965498  | O  | 9.307550430  | 2.812849283  | 0.131760702  | O  | 9.379707336  | 2.857728720  | 0.151828945  |
| O  | 15.579858780 | 6.815563679  | 0.974776268  | O  | 15.592704773 | 6.811458588  | 0.977530837  | O  | 15.659901619 | 6.879224300  | 0.969923913  |
| O  | 17.428817749 | 8.605247498  | 6.308817863  | O  | 17.453025818 | 8.612054825  | 6.295840740  | O  | 17.508419037 | 8.660363197  | 6.304626942  |
| O  | 15.859388351 | 0.401502728  | 7.011254787  | O  | 15.849783897 | 0.348109424  | 6.985448837  | O  | 15.906649590 | 0.408516586  | 6.983171463  |
| O  | 17.443359375 | 5.759047508  | 9.067779541  | O  | 17.452306747 | 5.772789001  | 9.074013710  | O  | 17.486829758 | 5.816699505  | 9.047403336  |
| O  | 9.380275726  | 6.395167828  | 6.960081577  | O  | 9.390508652  | 6.405792236  | 6.965584755  | O  | 9.449193954  | 6.493185043  | 6.958920002  |
| O  | 14.411249161 | 8.372868538  | 9.122914314  | O  | 14.405826569 | 8.361515999  | 9.116104126  | O  | 14.423955917 | 8.401376724  | 9.093179703  |
| O  | 10.648139000 | 6.170660496  | 9.279005051  | O  | 10.706084251 | 6.151242256  | 9.259723663  | O  | 10.711914063 | 6.222177029  | 9.283413887  |
| O  | 8.635808945  | 1.830582261  | 6.892446041  | O  | 8.678930283  | 1.842821121  | 6.821223736  | O  | 8.667437553  | 1.922430992  | 6.872034550  |
| O  | 15.510389328 | 9.061029434  | 2.427924395  | O  | 15.525691032 | 9.066573143  | 2.406813860  | O  | 15.564512253 | 9.125949860  | 2.411043406  |
| O  | 15.386486053 | 1.597647071  | 9.333582878  | O  | 15.424670219 | 1.585230470  | 9.300942421  | O  | 15.484915733 | 1.612857103  | 9.316273689  |
| O  | 8.591520309  | 6.695613861  | 2.584901333  | O  | 8.621331215  | 6.727897644  | 2.497876167  | O  | 8.688081741  | 6.812399864  | 2.501472950  |

|   |              |              |              |   |              |              |              |   |              |              |              |
|---|--------------|--------------|--------------|---|--------------|--------------|--------------|---|--------------|--------------|--------------|
| O | 10.611953735 | 8.762558937  | 6.926082134  | O | 10.602714539 | 8.789999962  | 6.884348869  | O | 11.382432938 | -0.541455686 | 6.877219200  |
| O | 9.894976616  | 7.651544571  | 4.685318947  | O | 9.857841492  | 7.623263836  | 4.675285816  | O | 9.939681053  | 7.706472874  | 4.663827896  |
| O | 13.362166405 | 0.634377420  | 7.946093082  | O | 13.367151260 | 0.630342603  | 7.940965652  | O | 13.424689293 | 0.729801476  | 7.927635193  |
| O | 16.859542847 | 4.455237865  | 1.305483341  | O | 16.880525589 | 4.456053734  | 1.291361690  | O | 16.909696579 | 4.515202045  | 1.272196412  |
| O | 16.897970200 | 0.943537474  | 4.655752659  | O | 16.906843185 | 0.933042884  | 4.645393372  | O | 16.965522766 | 0.993028104  | 4.652854443  |
| O | 13.294656754 | 7.935318470  | 1.372078061  | O | 13.307537079 | 7.911609650  | 1.347172379  | O | 13.358862877 | 7.966012955  | 1.354302883  |
| O | 9.783634186  | 3.992861271  | 8.011530876  | O | 9.724275589  | 3.997715473  | 8.032629967  | O | 9.827634811  | 4.074377537  | 7.970126629  |
| O | 0.810066342  | 0.952212095  | 17.651876450 | O | 0.827556372  | 0.968042970  | 17.632617950 | O | 0.866781712  | 0.995148778  | 17.632263184 |
| O | -0.711227834 | -0.724901378 | 12.415486336 | O | -0.699906468 | -0.722076714 | 12.401910782 | O | -0.656563044 | -0.686474562 | 12.380579948 |
| O | 7.342491150  | 1.282014370  | 11.718286514 | O | 7.352704048  | 1.316140890  | 11.707660675 | O | 7.442986012  | 1.367920399  | 11.718592644 |
| O | 2.203326941  | -0.548637748 | 9.611662865  | O | 2.143246651  | -0.527224898 | 9.594472885  | O | 2.212682724  | -0.512181461 | 9.591215134  |
| O | 0.741941512  | 7.367209435  | 11.630773544 | O | 0.749839842  | 7.361413956  | 11.621377945 | O | 0.816964209  | 7.403994560  | 11.638901711 |
| O | -0.831277907 | 2.110542297  | 9.504861832  | O | -0.802518725 | 2.118034601  | 9.520457268  | O | -0.744140506 | 2.168951511  | 9.546491623  |
| O | 5.592424393  | 6.147576332  | 10.560254097 | O | 5.543178558  | 6.105813026  | 10.578597069 | O | 5.672448635  | 6.239252567  | 10.636471748 |
| O | 7.318877220  | 7.851090908  | 15.706518173 | O | 7.304990768  | 7.848406792  | 15.705597878 | O | 7.365422249  | 7.885042191  | 15.721282005 |
| O | 5.741089821  | -0.535775125 | 16.408096313 | O | 5.707883358  | -0.356886208 | 16.332588196 | O | 5.776291370  | -0.327557683 | 16.351528168 |
| O | 7.321183681  | 5.037045479  | 18.452648163 | O | 7.289215088  | 4.943050861  | 18.372087479 | O | 7.352088928  | 5.044281960  | 18.366882324 |
| O | -0.666710675 | 5.720576286  | 16.316476822 | O | -0.650626600 | 5.722381115  | 16.298563004 | O | -0.563282132 | 5.762127399  | 16.296079636 |
| O | 4.140603065  | 7.634379387  | 18.518339157 | O | 4.187954903  | 7.634123802  | 18.433570862 | O | 4.197830677  | 7.689682007  | 18.439998627 |
| O | 0.634232402  | 5.418023109  | 18.615385056 | O | 0.620579481  | 5.420672894  | 18.607891083 | O | 0.684044600  | 5.475796223  | 18.616199493 |
| O | 17.401916504 | 1.132567167  | 16.205204010 | O | 17.405906677 | 1.127280831  | 16.201873779 | O | 17.446550369 | 1.178145528  | 16.214523315 |
| O | 5.802379608  | -0.857911706 | 11.764789581 | O | 5.881178856  | -0.887692809 | 11.784152031 | O | 5.860245705  | -0.764092684 | 11.783612251 |
| O | 5.307625771  | 0.852268577  | 18.686365128 | O | 5.311091900  | 0.874706030  | 18.666641235 | O | 5.379929543  | 0.920568824  | 18.677902222 |
| O | 17.259963989 | 6.059489727  | 11.929390907 | O | 17.260025024 | 6.059248924  | 11.929529190 | O | 17.331909180 | 6.084905148  | 11.913471222 |
| O | 1.222737670  | -1.269162059 | 16.223823547 | O | 1.230057478  | -1.264400959 | 16.210802078 | O | 1.310934901  | -1.217753649 | 16.197172165 |
| O | -0.191487610 | 6.930256844  | 14.026192665 | O | -0.181253076 | 6.943004608  | 14.014412880 | O | -0.148787200 | 6.970149994  | 14.010246277 |
| O | 3.244439602  | -0.007334709 | 17.316617966 | O | 3.262324572  | 0.025682569  | 17.259180069 | O | 3.323363304  | 0.101579309  | 17.254081726 |
| O | 6.673647881  | 3.605246544  | 10.679992676 | O | 6.804643631  | 3.642501831  | 10.653809547 | O | 6.764170647  | 3.686147690  | 10.692111015 |
| O | 6.780474663  | 0.119462013  | 14.031231880 | O | 6.800506115  | 0.167033672  | 14.019064903 | O | 6.871466637  | 0.199048162  | 14.028709412 |
| O | 3.167745113  | 7.079854488  | 10.761169434 | O | 3.177081108  | 7.208210945  | 10.739593506 | O | 3.236226797  | 7.175576210  | 10.755702019 |
| O | -0.320675492 | 3.293426037  | 17.341909409 | O | -0.322193861 | 3.295685291  | 17.330974579 | O | -0.262143016 | 3.343894958  | 17.319955826 |
| O | 10.240576744 | 0.923329711  | 17.632242203 | O | 10.261680603 | 0.938909769  | 17.657905579 | O | 10.308284760 | 0.990114927  | 17.641839981 |
| O | 7.761339664  | 8.350182533  | 12.275595665 | O | 8.549594879  | -0.937496901 | 12.318415642 | O | 8.518899918  | -0.965467215 | 12.280551910 |
| O | 16.677017212 | 1.311469793  | 11.650850296 | O | 16.675846100 | 1.313239336  | 11.642230988 | O | 16.722507477 | 1.385152102  | 11.674829483 |
| O | 11.588171005 | -0.548648715 | 9.569190025  | O | 11.582198143 | -0.564082980 | 9.533192635  | O | 11.674490929 | -0.493665278 | 9.528038025  |
| O | 10.125638008 | 7.389471531  | 11.640557289 | O | 10.128712654 | 7.359192848  | 11.610332489 | O | 10.182744026 | 7.493932247  | 11.619027138 |
| O | 8.628482819  | 2.093504906  | 9.537218094  | O | 8.605074883  | 1.993655086  | 9.463785172  | O | 8.700824738  | 2.181438684  | 9.525165558  |
| O | 14.862092018 | 6.063212395  | 10.351489067 | O | 14.862165451 | 6.055031776  | 10.353156090 | O | 14.911359787 | 6.105518341  | 10.337171555 |
| O | 16.776390076 | 7.902202606  | 15.683999062 | O | 16.779159546 | 7.897576809  | 15.683443069 | O | 16.852792740 | 7.950242043  | 15.703355789 |
| O | 15.171203613 | -0.365995765 | 16.373151779 | O | 15.174537659 | -0.364054620 | 16.361003876 | O | 15.222979546 | -0.333030522 | 16.348392487 |
| O | 16.818500519 | 5.031179428  | 18.497228622 | O | 16.804620743 | 5.036982536  | 18.459165573 | O | 16.875644684 | 5.086067200  | 18.458887100 |
| O | 8.680950165  | 5.644766808  | 16.290277481 | O | 8.716888428  | 5.671530247  | 16.289670944 | O | 8.816860199  | 5.725186825  | 16.279806137 |
| O | 13.729829788 | 7.645489693  | 18.500848770 | O | 13.735284805 | 7.634764671  | 18.486038208 | O | 13.776153564 | 7.688759327  | 18.481904984 |
| O | 9.974691391  | 5.441533089  | 18.624095917 | O | 9.929809570  | 5.433812141  | 18.659301758 | O | 9.992299080  | 5.487160683  | 18.663579941 |

|                                |              |              |              |            |              |              |              |                    |              |              |              |
|--------------------------------|--------------|--------------|--------------|------------|--------------|--------------|--------------|--------------------|--------------|--------------|--------------|
| O                              | 7.954588413  | 1.074171782  | 16.244750977 | O          | 7.986166954  | 1.088836789  | 16.229314804 | O                  | 8.035202026  | 1.140875816  | 16.232826233 |
| O                              | 14.844837189 | 8.308145523  | 11.772842407 | O          | 14.863169670 | 8.301686287  | 11.766222000 | O                  | 14.912327766 | 8.360655785  | 11.741642952 |
| O                              | 14.707201004 | 0.881779671  | 18.673620224 | O          | 14.733917236 | 0.870447874  | 18.672334671 | O                  | 14.799607277 | 0.914684176  | 18.656394958 |
| O                              | 8.034336090  | 5.716273308  | 11.993743896 | O          | 7.960092545  | 5.802184105  | 12.040023804 | O                  | 8.125614166  | 5.787240505  | 11.996047974 |
| O                              | 9.915321350  | 8.016128540  | 16.321289063 | O          | 9.898324966  | 8.071419716  | 16.315021515 | O                  | 10.663652420 | -1.254596949 | 16.271190643 |
| O                              | 9.197731972  | 6.960834503  | 14.040771484 | O          | 9.227614403  | 6.982439518  | 14.044602394 | O                  | 9.270566940  | 7.043817520  | 14.028850555 |
| O                              | 12.675722122 | -0.106651187 | 17.314386368 | O          | 12.689680099 | -0.102046490 | 17.323322296 | O                  | 12.745710373 | -0.033121705 | 17.306339264 |
| O                              | 16.168767929 | 3.699553490  | 10.667320251 | O          | 16.168794632 | 3.694339275  | 10.660126686 | O                  | 16.218091965 | 3.747488499  | 10.648452759 |
| O                              | 16.212511063 | 0.178857446  | 14.016225815 | O          | 16.224143982 | 0.179205060  | 14.006851196 | O                  | 16.285932541 | 0.200313449  | 14.009300232 |
| O                              | 12.585489273 | 7.216307163  | 10.759181023 | O          | 12.592749596 | 7.231880665  | 10.771408081 | O                  | 12.639867783 | 7.260784149  | 10.777069092 |
| O                              | 9.037921906  | 3.249699831  | 17.396579742 | O          | 9.091163635  | 3.258283854  | 17.346923828 | O                  | 9.118256569  | 3.315485001  | 17.354490280 |
| O                              | 4.935378075  | 2.087282658  | 15.658835411 | O          | 3.401657104  | 2.382769108  | 14.883758545 | O                  | 3.236436844  | 2.464396954  | 15.107323647 |
| O                              | 4.992076397  | 3.837267637  | 13.470701218 | O          | 4.463362694  | 4.368745327  | 13.817072868 | O                  | 4.198298931  | 4.516227245  | 13.975444794 |
| Cu                             | 4.096916676  | 2.880493879  | 12.222102165 | Cu         | 3.839551449  | 2.719207287  | 13.025749207 | Cu                 | 3.460776091  | 2.856710672  | 13.183977127 |
| Cu                             | 4.732263088  | 3.782649517  | 16.236270905 | Cu         | 4.259233475  | 3.914526939  | 15.703495026 | Cu                 | 4.166997910  | 3.989632130  | 15.842043877 |
| H                              | 14.937890053 | 6.088729858  | 0.882433653  | H          | 14.949589729 | 6.080693245  | 0.895816088  | H                  | 15.022108078 | 6.142329216  | 0.894624949  |
| H                              | 2.981339931  | 0.900717616  | 13.358393669 | H          | 2.771411896  | 0.392296553  | 13.147363663 | H                  | 2.616444111  | 0.761920750  | 11.810546875 |
| H                              | 2.501547813  | 0.830692768  | 11.782577515 | H          | 2.821843147  | 0.777031422  | 11.557017326 | H                  | 4.109550476  | 0.410040021  | 12.401116371 |
| H                              | 4.009976864  | 0.321455836  | 12.214399338 | H          | 4.183479309  | 0.249135911  | 12.309806824 | H                  | 2.796611071  | 0.364787698  | 13.387845993 |
| H                              | 3.484708309  | 4.582085609  | 10.489152908 | H          | 4.306477547  | 4.393861771  | 11.117052078 | H                  | 3.606268644  | 4.501890182  | 11.254742622 |
| H                              | 4.506810665  | 3.436055660  | 9.910650253  | H          | 4.423761368  | 2.888189316  | 10.492930412 | H                  | 4.900244236  | 3.516510248  | 11.086779594 |
| H                              | 2.867468596  | 3.152631998  | 9.892360687  | H          | 2.934997082  | 3.556777239  | 10.743192673 | H                  | 3.415076971  | 3.030907631  | 10.546779633 |
| H                              | 14.213610649 | 5.339594841  | 10.242522240 | H          | 14.212802887 | 5.332653522  | 10.248245239 | H                  | 14.260477066 | 5.381643295  | 10.251948357 |
| H                              | 3.748594761  | 4.061339378  | 18.590539932 | H          | 3.881175280  | 4.136321068  | 18.294340134 | H                  | 3.925057650  | 4.206830978  | 18.448453903 |
| H                              | 2.570475101  | 3.348947048  | 17.629095078 | H          | 2.625880241  | 3.305372953  | 17.579292297 | H                  | 2.667843342  | 3.325773716  | 17.792539597 |
| H                              | 3.871529818  | 2.462732792  | 18.150243759 | H          | 4.052051544  | 2.553430557  | 17.904470444 | H                  | 4.136450291  | 2.629800081  | 18.050743103 |
| H                              | 5.346165180  | 6.203875065  | 15.739320755 | H          | 5.699968338  | 6.045803547  | 15.610302925 | H                  | 5.676753044  | 6.060548782  | 15.636673927 |
| H                              | 4.570439339  | 6.155234337  | 17.188188553 | H          | 4.667010784  | 6.160320282  | 16.875463486 | H                  | 4.714769363  | 6.235137939  | 16.949254990 |
| H                              | 6.098522663  | 5.613551617  | 17.098091125 | H          | 6.016099930  | 5.258918762  | 17.028242111 | H                  | 6.046881199  | 5.305201054  | 17.058759689 |
| H                              | 4.997715950  | 2.210980415  | 14.689270973 | H          | 3.509763241  | 1.521183014  | 15.323629379 | H                  | 5.053049088  | 4.795104980  | 13.603997231 |
| H                              | 5.938148022  | 3.908281803  | 13.229413986 | H          | 5.321907520  | 4.684052467  | 13.482421875 | H                  | 3.443289995  | 1.610990763  | 15.527559280 |
| N                              | 3.297243118  | 1.046548367  | 12.393026352 | N          | 3.349660635  | 0.843855739  | 12.433996201 | H                  | 1.338249207  | 4.671142578  | 13.308171272 |
| N                              | 3.631365776  | 3.566826105  | 10.435484886 | N          | 3.871925831  | 3.459002018  | 11.144886017 | H                  | 0.548673451  | 3.459720135  | 12.535553932 |
| N                              | 3.573371172  | 3.389788389  | 17.826452255 | N          | 3.642157078  | 3.435093880  | 17.572927475 | H                  | 0.940171003  | 3.313606739  | 14.122540474 |
| N                              | 5.204092979  | 5.631227016  | 16.573331833 | N          | 5.261220932  | 5.503036976  | 16.357151031 | N                  | 3.226744175  | 0.890626550  | 12.623148918 |
|                                |              |              |              |            |              |              |              | N                  | 3.887317181  | 3.518095255  | 11.312276840 |
|                                |              |              |              |            |              |              |              | N                  | 3.676158667  | 3.494407654  | 17.742296219 |
|                                |              |              |              |            |              |              |              | N                  | 5.265789509  | 5.549440861  | 16.420173645 |
|                                |              |              |              |            |              |              |              | N                  | 1.282889128  | 3.652948856  | 13.220192909 |
| <b>Structure Q<sub>3</sub></b> |              |              |              | <b>ts5</b> |              |              |              | <b>Structure A</b> |              |              |              |
| Si                             | 0.111344039  | 2.443337202  | 8.249779701  | Si         | 0.092674077  | 2.443238974  | 8.288076401  | Si                 | 0.062787652  | 2.488001347  | 8.345581055  |
| Si                             | 7.950971127  | 0.683286905  | 3.169215918  | Si         | 7.922149658  | 0.706389308  | 3.207546711  | Si                 | 7.904357910  | 0.665149331  | 3.259986162  |
| Si                             | 2.419319868  | 8.218028069  | 0.950245500  | Si         | 2.398022175  | 8.198570251  | 0.980299294  | Si                 | 2.393449068  | 8.193976402  | 1.060106397  |
| Si                             | 5.530155659  | 8.295038223  | 1.184905887  | Si         | 5.523376942  | 8.325926781  | 1.238930583  | Si                 | 5.480361462  | 8.289840698  | 1.301761866  |

|    |              |              |              |    |              |              |              |    |              |              |              |
|----|--------------|--------------|--------------|----|--------------|--------------|--------------|----|--------------|--------------|--------------|
| Si | 7.855834484  | 0.619890094  | 6.277751446  | Si | 7.859600544  | 0.657290280  | 6.327646732  | Si | 7.845445633  | 0.622872889  | 6.378610611  |
| Si | 0.053642452  | 5.616729259  | 8.341883659  | Si | 0.051336288  | 5.605600834  | 8.400504112  | Si | 0.008716166  | 5.645285606  | 8.477866173  |
| Si | 0.121147633  | 7.915413857  | 6.251277924  | Si | 0.127619952  | 7.916281223  | 6.278968811  | Si | 0.099183977  | 7.963845730  | 6.343591690  |
| Si | 5.570557117  | 0.380983055  | 8.431371689  | Si | 5.550834179  | 0.418547869  | 8.472402573  | Si | 5.519732475  | 0.438694954  | 8.529117584  |
| Si | 2.441074848  | 0.338625968  | 8.260749817  | Si | 2.421811104  | 0.339958906  | 8.248893738  | Si | 2.402659893  | 0.385964811  | 8.302776337  |
| Si | 0.144371107  | 8.038809776  | 3.164861679  | Si | 0.123156190  | 8.017143250  | 3.199718237  | Si | 0.090992168  | 8.029586792  | 3.257080078  |
| Si | 7.979905128  | 2.983993053  | 1.012683153  | Si | 7.927308559  | 3.013962269  | 1.049927354  | Si | 7.942065239  | 2.954846859  | 1.130996823  |
| Si | 9.509654999  | 2.456408739  | 8.222276688  | Si | 9.515876770  | 2.487674952  | 8.274030685  | Si | 9.493626595  | 2.459733963  | 8.312067986  |
| Si | 17.384641647 | 0.728411436  | 3.171834707  | Si | 17.397975922 | 0.736850381  | 3.216431856  | Si | 17.347429276 | 0.731312215  | 3.280567169  |
| Si | 11.794302940 | 8.182131767  | 1.018428922  | Si | 11.790156364 | 8.216218948  | 1.062097073  | Si | 11.755349159 | 8.166297913  | 1.134072661  |
| Si | 14.904443741 | 8.378021240  | 1.225553393  | Si | 14.891875267 | 8.404489517  | 1.267266154  | Si | 14.869935036 | 8.384332657  | 1.336425543  |
| Si | 17.301963806 | 0.598798394  | 6.278441429  | Si | 17.289239883 | 0.583748043  | 6.321117401  | Si | 17.260391235 | 0.630059958  | 6.387560844  |
| Si | 9.464082718  | 5.594532967  | 8.434246063  | Si | 9.473568916  | 5.630197525  | 8.485372543  | Si | 9.481692314  | 5.572020531  | 8.533293724  |
| Si | 9.499467850  | 7.880397797  | 6.286867619  | Si | 9.496741295  | 7.926910877  | 6.347669601  | Si | 9.475055695  | 7.891253471  | 6.418738842  |
| Si | 14.960297585 | 0.427137554  | 8.378615379  | Si | 14.958713531 | 0.428103566  | 8.423170090  | Si | 14.938700676 | 0.439409137  | 8.513181686  |
| Si | 11.816622734 | 0.316723406  | 8.227049828  | Si | 11.819630623 | 0.348475933  | 8.304536819  | Si | 11.788895607 | 0.310288310  | 8.387834549  |
| Si | 9.537428856  | 7.987633228  | 3.196099758  | Si | 9.511537552  | 7.992911339  | 3.257338762  | Si | 9.501029015  | 7.912405968  | 3.323530436  |
| Si | 17.374763489 | 2.993640184  | 0.978765190  | Si | 17.345785141 | 3.007602692  | 1.033086896  | Si | 17.318237305 | 3.007810831  | 1.083491921  |
| Si | -0.566888571 | 1.748795152  | 17.583673477 | Si | -0.583715439 | 1.749697804  | 17.629241943 | Si | -0.598461330 | 1.759216070  | 17.685394287 |
| Si | 7.191082954  | -0.096291304 | 12.518802643 | Si | 7.176504135  | -0.070585191 | 12.553318977 | Si | 7.214650631  | -0.120704710 | 12.618648529 |
| Si | 1.708262205  | 7.390047073  | 10.323700905 | Si | 1.674832702  | 7.380191803  | 10.356374741 | Si | 1.670297146  | 7.440359116  | 10.426955223 |
| Si | 4.817150593  | 7.545325756  | 10.612080574 | Si | 4.788566589  | 7.567880630  | 10.639564514 | Si | 4.795577526  | 7.525369167  | 10.652233124 |
| Si | 7.234954834  | -0.113325000 | 15.661707878 | Si | 7.201005936  | -0.044030190 | 15.702010155 | Si | 7.185035706  | -0.129016280 | 15.755331039 |
| Si | -0.570926368 | 4.919941902  | 17.752683640 | Si | -0.596585631 | 4.913640499  | 17.780757904 | Si | -0.609851599 | 4.920304775  | 17.840480804 |
| Si | -0.516364336 | 7.205481529  | 15.613725662 | Si | -0.549003541 | 7.207660675  | 15.656666756 | Si | -0.558626115 | 7.222426891  | 15.729928017 |
| Si | 4.891149521  | -0.270316720 | 17.775306702 | Si | 4.864687920  | -0.235906124 | 17.832666397 | Si | 4.849269867  | -0.309078574 | 17.889318466 |
| Si | 1.780503750  | -0.361819386 | 17.540512085 | Si | 1.741668463  | -0.363812804 | 17.600294113 | Si | 1.752624273  | -0.353188992 | 17.674568176 |
| Si | -0.576385856 | 7.251837730  | 12.508466721 | Si | -0.597113013 | 7.273500919  | 12.559950829 | Si | -0.579921186 | 7.315291405  | 12.626973152 |
| Si | 7.250479221  | 2.196605206  | 10.394701004 | Si | 7.230921268  | 2.224476814  | 10.429654121 | Si | 7.205162525  | 2.209357262  | 10.513438225 |
| Si | 8.892760277  | 1.709705114  | 17.628629684 | Si | 8.851428986  | 1.755967259  | 17.649139404 | Si | 8.839946747  | 1.696177721  | 17.711147308 |
| Si | 16.694967270 | -0.035761654 | 12.516998291 | Si | 16.676624298 | -0.024270773 | 12.575532913 | Si | 16.642980576 | -0.008229971 | 12.652489662 |
| Si | 11.056739807 | 7.421366692  | 10.340324402 | Si | 11.058732986 | 7.430991650  | 10.407912254 | Si | 11.051852226 | 7.387017250  | 10.464423180 |
| Si | 14.161502838 | 7.642454147  | 10.581047058 | Si | 14.151811600 | 7.642010689  | 10.648439407 | Si | 14.143799782 | 7.648802757  | 10.716362000 |
| Si | 16.643014908 | -0.093538642 | 15.642925262 | Si | 16.618064880 | -0.101257205 | 15.690223694 | Si | 16.598596573 | -0.086684227 | 15.758796692 |
| Si | 8.798598289  | 4.885544777  | 17.779745102 | Si | 8.840837479  | 4.912421227  | 17.858530045 | Si | 8.792438507  | 4.852350235  | 17.933084488 |
| Si | 8.880965233  | 7.178039074  | 15.660260201 | Si | 8.866517067  | 7.217937469  | 15.718034744 | Si | 8.846116066  | 7.150432110  | 15.771381378 |
| Si | 14.335027695 | -0.314149022 | 17.757045746 | Si | 14.305416107 | -0.287519336 | 17.803174973 | Si | 14.290580750 | -0.305965662 | 17.875734329 |
| Si | 11.199228287 | -0.391416550 | 17.636827469 | Si | 11.179194450 | -0.361166954 | 17.665798187 | Si | 11.148553848 | -0.418692946 | 17.727550507 |
| Si | 8.814754486  | 7.094375134  | 12.560658455 | Si | 8.780017853  | 7.116415501  | 12.607361794 | Si | 8.792591095  | 7.094665527  | 12.677877426 |
| Si | 16.628005981 | 2.239156961  | 10.342350006 | Si | 16.627431870 | 2.247542858  | 10.384926796 | Si | 16.598367691 | 2.267534971  | 10.469292641 |
| Al | 7.830529213  | 6.183343410  | 1.186918378  | Al | 7.825393677  | 6.190150738  | 1.313519478  | Al | 7.805449963  | 6.130055904  | 1.372509956  |
| Al | 17.416494370 | 6.143757820  | 1.218324065  | Al | 17.378383636 | 6.148199558  | 1.250198960  | Al | 17.366275787 | 6.145402431  | 1.301281929  |
| Al | 7.177722454  | 5.336668491  | 10.689601898 | Al | 7.145319462  | 5.375916481  | 10.709496498 | Al | 7.109139442  | 5.334207058  | 10.743041992 |
| Al | 16.650865555 | 5.388442039  | 10.533980370 | Al | 16.639408112 | 5.396875381  | 10.581495285 | Al | 16.632236481 | 5.403980732  | 10.649191856 |

|   |              |              |             |   |              |              |             |   |              |              |             |
|---|--------------|--------------|-------------|---|--------------|--------------|-------------|---|--------------|--------------|-------------|
| O | 1.571112871  | 1.715153933  | 8.412319183 | O | 1.548555732  | 1.709197998  | 8.443209648 | O | 1.526297569  | 1.756560564  | 8.498025894 |
| O | 0.009797081  | 0.058641851  | 3.094059706 | O | 0.022259444  | 0.060182452  | 3.159711838 | O | -0.022920027 | 0.065180689  | 3.220705032 |
| O | 8.027534485  | 2.083492756  | 2.357418299 | O | 8.022150993  | 2.096992970  | 2.383929014 | O | 8.085476875  | 2.076284647  | 2.490386248 |
| O | 2.940117359  | 0.248394042  | 0.157881171 | O | 2.875792980  | 0.232911557  | 0.208103240 | O | 2.951462030  | 0.241259620  | 0.288322270 |
| O | 1.478057623  | 8.234743118  | 2.260495186 | O | 1.461586595  | 8.173759460  | 2.297864914 | O | 1.425024271  | 8.209568024  | 2.355160236 |
| O | -0.000372691 | 2.913976908  | 0.232115313 | O | -0.045027770 | 2.937642097  | 0.264880657 | O | -0.068736151 | 2.951708555  | 0.319545776 |
| O | 6.246261120  | 6.890712738  | 0.931225598 | O | 6.294666290  | 6.956929684  | 0.998962283 | O | 6.288613796  | 6.936541557  | 1.121107578 |
| O | 8.065317154  | 8.659618378  | 6.393823147 | O | 8.053229332  | 8.688079834  | 6.463784695 | O | 8.026374817  | 8.646127701  | 6.524394989 |
| O | 6.446435928  | 0.375112176  | 7.067065239 | O | 6.450486660  | 0.424440503  | 7.125575066 | O | 6.439948082  | 0.438724279  | 7.198836803 |
| O | 8.111882210  | 5.708634377  | 9.273675919 | O | 8.123291969  | 5.765722275  | 9.327317238 | O | 8.135063171  | 5.639910221  | 9.381814957 |
| O | 0.075323403  | 6.438859463  | 6.931295395 | O | 0.113125503  | 6.469089508  | 7.019404411 | O | 0.094209015  | 6.535067558  | 7.119327068 |
| O | 4.982490540  | 8.331982613  | 9.182977676 | O | 4.947702408  | 8.369419098  | 9.220874786 | O | 4.888851166  | 8.384223938  | 9.260931969 |
| O | 1.269386292  | 6.206485748  | 9.293549538 | O | 1.264496088  | 6.130641460  | 9.394938469 | O | 1.176007867  | 6.171448708  | 9.530690193 |
| O | 18.136438370 | 1.821001410  | 6.978196621 | O | 18.093221664 | 1.817175865  | 7.035623074 | O | 18.073680878 | 1.874083519  | 7.080766201 |
| O | 6.150236607  | 9.130885124  | 2.438373327 | O | 6.079005241  | 9.178920746  | 2.515785456 | O | 6.716623783  | -0.173386633 | 2.527254581 |
| O | 6.086316109  | 1.528536797  | 9.455801964 | O | 6.047424793  | 1.564057708  | 9.509658813 | O | 5.993186474  | 1.568361878  | 9.605660439 |
| O | 18.056882858 | 6.841137886  | 2.643147230 | O | 18.000165939 | 6.851620674  | 2.676028013 | O | 17.990669250 | 6.849648952  | 2.725703001 |
| O | 1.904849768  | -0.540866435 | 7.014984131 | O | 1.925085068  | -0.483704388 | 6.950272560 | O | 1.903815389  | -0.434426606 | 7.001310825 |
| O | 0.593652487  | 7.775584221  | 4.710914135 | O | 0.563502073  | 7.710106850  | 4.738864899 | O | 0.521065950  | 7.728816032  | 4.803347111 |
| O | 4.007366657  | 0.717038929  | 8.061719894 | O | 3.988112211  | 0.742031336  | 8.097841263 | O | 3.965786934  | 0.799546599  | 8.145747185 |
| O | 7.608590126  | 4.482977390  | 1.334174514 | O | 7.556887627  | 4.499518394  | 1.416295409 | O | 7.528587818  | 4.437982082  | 1.466683865 |
| O | 7.506724358  | 0.948945045  | 4.720660210 | O | 7.517448902  | 0.981969833  | 4.769423485 | O | 7.485420227  | 0.919118583  | 4.822362423 |
| O | 3.942911863  | 8.059656143  | 1.455104709 | O | 3.931730986  | 8.056652069  | 1.459013224 | O | 3.902847052  | 7.988768101  | 1.588823557 |
| O | 0.372811615  | 4.034074783  | 8.038392067 | O | 0.353059411  | 4.030331135  | 8.053055763 | O | 0.356957793  | 4.077155113  | 8.133161545 |
| O | 10.954042435 | 1.689931393  | 8.303243637 | O | 10.958853722 | 1.722231627  | 8.410418510 | O | 10.916325569 | 1.674154520  | 8.491912842 |
| O | 9.436300278  | 0.026391357  | 3.156548262 | O | 9.394384384  | 0.019198090  | 3.168912649 | O | 9.337552071  | -0.092976391 | 3.211038351 |
| O | 17.413085938 | 2.122594595  | 2.355656385 | O | 17.426761627 | 2.141820908  | 2.414849281 | O | 17.375583649 | 2.119210720  | 2.452460766 |
| O | 12.387689590 | 0.240091801  | 0.278317690 | O | 12.366312027 | 0.262654841  | 0.302325428 | O | 12.299944878 | 0.204812974  | 0.360675693 |
| O | 10.948354721 | 8.209370613  | 2.381399870 | O | 10.894424438 | 8.205072403  | 2.389812708 | O | 10.896884918 | 8.162428856  | 2.487365484 |
| O | 9.427452087  | 2.835175514  | 0.233569905 | O | 9.366935730  | 2.892827988  | 0.239784583 | O | 9.380914688  | 2.847896576  | 0.319146454 |
| O | 15.665854454 | 6.853440762  | 1.081079364 | O | 15.631031036 | 6.871645927  | 1.106727481 | O | 15.618841171 | 6.860562325  | 1.150111198 |
| O | 17.482997894 | 8.616518974  | 6.354936123 | O | 17.491569519 | 8.615682602  | 6.405500412 | O | 17.461502075 | 8.659483910  | 6.476651669 |
| O | 15.877760887 | 0.368932843  | 7.041743279 | O | 15.866005898 | 0.324849188  | 7.080271244 | O | 15.849179268 | 0.381774664  | 7.170710564 |
| O | 17.477827072 | 5.795647144  | 9.081356049 | O | 17.467826843 | 5.792974472  | 9.123995781 | O | 17.401119232 | 5.785383224  | 9.156559944 |
| O | 9.393088341  | 6.448383331  | 7.040678978 | O | 9.413784027  | 6.489364147  | 7.097070694 | O | 9.379164696  | 6.457493782  | 7.167256355 |
| O | 14.422573090 | 8.385919571  | 9.172210693 | O | 14.399377823 | 8.403333664  | 9.248293877 | O | 14.411875725 | 8.400829315  | 9.314313889 |
| O | 10.741539955 | 6.198544025  | 9.315542221 | O | 10.753302574 | 6.216537476  | 9.372056961 | O | 10.753680229 | 6.177575588  | 9.420546532 |
| O | 8.649980545  | 1.881669044  | 6.952726841 | O | 8.677800179  | 1.910820961  | 6.994006634 | O | 8.684231758  | 1.876819611  | 7.017032623 |
| O | 15.574899673 | 9.123870850  | 2.482866526 | O | 15.593361855 | 9.141472816  | 2.509391069 | O | 15.542992592 | 9.111302376  | 2.602317572 |
| O | 15.487759590 | 1.597960234  | 9.367609024 | O | 15.511801720 | 1.610540390  | 9.381879807 | O | 15.466710091 | 1.625966311  | 9.481356621 |
| O | 8.664664268  | 6.824737549  | 2.553855896 | O | 8.647593498  | 6.776566505  | 2.713736534 | O | 8.698725700  | 6.660965919  | 2.761269808 |
| O | 10.667411804 | 8.792171478  | 6.978607178 | O | 11.339835167 | -0.543356419 | 7.044828415 | O | 10.626194000 | 8.806616783  | 7.132326126 |
| O | 9.936866760  | 7.659338474  | 4.744895935 | O | 9.948025703  | 7.726581573  | 4.807545662 | O | 9.934947968  | 7.692188740  | 4.883290768 |
| O | 13.400886536 | 0.685023606  | 8.024623871 | O | 13.400747299 | 0.712988913  | 8.077539444 | O | 13.370738983 | 0.683208466  | 8.179618835 |



|   |              |              |              |   |              |              |              |   |              |              |              |
|---|--------------|--------------|--------------|---|--------------|--------------|--------------|---|--------------|--------------|--------------|
| O | 16.951194763 | 4.495398998  | 1.317321301  | O | 16.899425507 | 4.505011559  | 1.363749623  | O | 16.885728836 | 4.503923416  | 1.440737009  |
| O | 16.965694427 | 0.977756202  | 4.727652073  | O | 16.960317612 | 0.969771147  | 4.770473957  | O | 16.913040161 | 0.993800640  | 4.834878922  |
| O | 13.369242668 | 7.951583385  | 1.445741057  | O | 13.353630066 | 8.017324448  | 1.529229403  | O | 13.330970764 | 7.984356403  | 1.571419835  |
| O | 9.816245079  | 4.040112972  | 8.039938927  | O | 9.814126968  | 4.074120522  | 8.092780113  | O | 9.846035004  | 4.030799389  | 8.105545998  |
| O | 0.879034877  | 0.991691828  | 17.626968384 | O | 0.860886574  | 1.000380158  | 17.711269379 | O | 0.839610457  | 0.991482258  | 17.777023315 |
| O | -0.664616406 | -0.699464440 | 12.423409462 | O | -0.677088797 | -0.670958638 | 12.501336098 | O | -0.720451593 | -0.674926400 | 12.571162224 |
| O | 7.419145584  | 1.322426796  | 11.773230553 | O | 7.409839630  | 1.346232533  | 11.804912567 | O | 7.411533356  | 1.294117928  | 11.855890274 |
| O | 2.259338856  | -0.514006615 | 9.652029991  | O | 2.189311504  | -0.573377609 | 9.593417168  | O | 2.202559948  | -0.537291050 | 9.638712883  |
| O | 0.812279463  | 7.396999836  | 11.675289154 | O | 0.777363718  | 7.433203697  | 11.703974724 | O | 0.816927791  | 7.566390038  | 11.809601784 |
| O | -0.736877799 | 2.169985056  | 9.623703957  | O | -0.726230085 | 2.188136339  | 9.684372902  | O | -0.775485456 | 2.232262135  | 9.726887703  |
| O | 5.672977448  | 6.215983391  | 10.690925598 | O | 5.620834351  | 6.220472813  | 10.679704666 | O | 5.589262009  | 6.158610821  | 10.561838150 |
| O | 7.395217896  | 7.888098717  | 15.770208359 | O | 7.400169373  | 7.974071980  | 15.844092369 | O | 7.363609314  | 7.871572495  | 15.859002113 |
| O | 5.797415257  | -0.321605802 | 16.410621643 | O | 5.778454304  | -0.279832602 | 16.463647842 | O | 5.769753456  | -0.364932775 | 16.526836395 |
| O | 7.347075462  | 5.052885056  | 18.432949066 | O | 7.442889214  | 5.057085037  | 18.615839005 | O | 7.364951134  | 4.995116234  | 18.633602142 |
| O | -0.571909249 | 5.759380341  | 16.345891953 | O | -0.601939976 | 5.753002167  | 16.372358322 | O | -0.611351669 | 5.761419296  | 16.430587769 |
| O | 4.279972076  | 7.682699203  | 18.508451462 | O | 4.312677383  | 7.724873543  | 18.576070786 | O | 4.177014828  | 7.626693249  | 18.591548920 |
| O | 0.667200804  | 5.495517254  | 18.672367096 | O | 0.650053382  | 5.479296684  | 18.694341660 | O | 2.009108067  | 6.979711056  | 0.024574205  |
| O | 17.409524918 | 1.196942925  | 16.297948837 | O | 17.406646729 | 1.170002580  | 16.346574783 | O | 17.385810852 | 1.184988022  | 16.407264709 |
| O | 5.864640713  | -0.819433331 | 11.868150711 | O | 5.868091583  | -0.817574143 | 11.899833679 | O | 5.982715130  | -0.938703358 | 11.923905373 |
| O | 5.429352283  | 0.921329975  | 18.724143982 | O | 6.747320175  | 2.456291199  | 0.041938826  | O | 6.793066025  | 2.317112446  | 0.139438123  |
| O | 17.336744308 | 6.077773571  | 11.946578979 | O | 17.310369492 | 6.104959965  | 11.993322372 | O | 17.415681839 | 6.105160713  | 12.006479263 |
| O | 1.348408937  | -1.239880204 | 16.234937668 | O | 1.298260331  | -1.229341388 | 16.288124084 | O | 1.297186732  | -1.230408788 | 16.372274399 |
| O | -0.148383498 | 6.957435131  | 14.053049088 | O | -0.157370210 | 6.973182678  | 14.097828865 | O | -0.163268864 | 6.998690605  | 14.167121887 |
| O | 3.347019196  | 0.073175669  | 17.344379425 | O | 3.311468124  | 0.030728698  | 17.423248291 | O | 3.316215515  | 0.080674529  | 17.448719025 |
| O | 6.730102539  | 3.651984930  | 10.799439430 | O | 6.730240822  | 3.684698343  | 10.841099739 | O | 6.709825516  | 3.650521994  | 10.995944023 |
| O | 6.878292561  | 0.222294807  | 14.103117943 | O | 6.862586975  | 0.251707077  | 14.133939743 | O | 6.837810040  | 0.187307596  | 14.188613892 |
| O | 3.237653255  | 7.134181023  | 10.792968750 | O | 3.205436468  | 7.195729733  | 10.855579376 | O | 3.201747417  | 7.196983337  | 10.901348114 |
| O | -0.266928077 | 3.340749741  | 17.399522781 | O | -0.298443437 | 3.339515209  | 17.414875031 | O | -0.311242819 | 3.347859621  | 17.477350235 |
| O | 10.358942986 | 0.997207999  | 17.728910446 | O | 10.297505379 | 1.001437545  | 17.739986420 | O | 10.299122810 | 0.963809013  | 17.798362732 |
| O | 7.833128452  | 8.400433540  | 12.397465706 | O | 8.521178246  | -0.954566598 | 12.428144455 | O | 8.620874405  | -0.915879667 | 12.561883926 |
| O | 16.717264175 | 1.372921228  | 11.725225449 | O | 16.687709808 | 1.374693155  | 11.765061378 | O | 16.677022934 | 1.383712292  | 11.838445663 |
| O | 11.619813919 | -0.515167475 | 9.621929169  | O | 11.644643784 | -0.501308799 | 9.695552826  | O | 11.600119591 | -0.536561012 | 9.777459145  |
| O | 10.148071289 | 7.398311615  | 11.669163704 | O | 10.121909142 | 7.383249760  | 11.719717026 | O | 10.143995285 | 7.307928085  | 11.793705940 |
| O | 8.686138153  | 2.170931339  | 9.608305931  | O | 8.657678604  | 2.202010155  | 9.634700775  | O | 8.594793320  | 2.220791578  | 9.658160210  |
| O | 14.902132034 | 6.103819847  | 10.428685188 | O | 14.887053490 | 6.103578568  | 10.467456818 | O | 14.890156746 | 6.114633083  | 10.575103760 |
| O | 16.888238907 | 7.971003532  | 15.756950378 | O | 16.834838867 | 7.941482544  | 15.792005539 | O | 16.830898285 | 7.965075970  | 15.853729248 |
| O | 15.229317665 | -0.382087469 | 16.402263641 | O | 15.197727203 | -0.359980583 | 16.448705673 | O | 15.192747116 | -0.374175847 | 16.530324936 |
| O | 16.860893250 | 5.088375568  | 18.499027252 | O | 16.841892242 | 5.082013607  | 18.540416718 | O | 16.821086884 | 5.087303162  | 18.590785980 |
| O | 8.822841644  | 5.712826729  | 16.358970642 | O | 8.769054413  | 5.760876656  | 16.442134857 | O | 8.762115479  | 5.704441071  | 16.515838623 |
| O | 13.787915230 | 7.646568298  | 18.551797867 | O | 13.750613213 | 7.668427467  | 18.587825775 | O | 13.761410713 | 7.661030769  | 18.671712875 |
| O | 11.385361671 | 6.966403484  | 0.004142016  | O | 11.464014053 | 6.994421959  | 0.021800289  | O | 11.401996613 | 6.930263042  | 0.119536616  |
| O | 8.083914757  | 1.123510480  | 16.311210632 | O | 8.024350166  | 1.228838921  | 16.315370560 | O | 8.023675919  | 1.125329614  | 16.389213562 |
| O | 14.885023117 | 8.366868973  | 11.827071190 | O | 14.888858795 | 8.351646423  | 11.892377853 | O | 14.849636078 | 8.370195389  | 11.969321251 |
| O | 14.859825134 | 0.870171666  | 18.720441818 | O | 16.199825287 | 2.363811970  | 0.058395058  | O | 16.165740967 | 2.379336834  | 0.101538517  |

|    |              |              |              |    |              |              |              |    |              |              |              |
|----|--------------|--------------|--------------|----|--------------|--------------|--------------|----|--------------|--------------|--------------|
| O  | 8.062471390  | 5.746394634  | 12.150414467 | O  | 7.986401081  | 5.781263828  | 12.209441185 | O  | 7.912887096  | 5.830381870  | 12.235190392 |
| O  | 10.675827026 | -1.276467562 | 16.383569717 | O  | 10.700778961 | -1.253025293 | 16.395324707 | O  | 10.659942627 | -1.293318987 | 16.445589066 |
| O  | 9.306200027  | 7.010887146  | 14.116186142 | O  | 9.252119064  | 7.006239891  | 14.167435646 | O  | 9.262313843  | 6.892387867  | 14.231850624 |
| O  | 12.774747849 | -0.049203753 | 17.395441055 | O  | 12.749572754 | 0.004346609  | 17.434333801 | O  | 12.725867271 | -0.078077197 | 17.510068893 |
| O  | 16.206825256 | 3.739667416  | 10.694705963 | O  | 16.200166702 | 3.746021271  | 10.737154961 | O  | 16.173009872 | 3.762680531  | 10.845801353 |
| O  | 16.302112579 | 0.214127302  | 14.076193810 | O  | 16.266952515 | 0.227283239  | 14.127977371 | O  | 16.223566055 | 0.243182540  | 14.201877594 |
| O  | 12.624206543 | 7.258323193  | 10.846737862 | O  | 12.616642952 | 7.261251450  | 10.937559128 | O  | 12.613851547 | 7.238230228  | 10.979442596 |
| O  | 9.118850708  | 3.310728073  | 17.418651581 | O  | 9.138857841  | 3.350231171  | 17.444812775 | O  | 9.103116989  | 3.295286655  | 17.503252029 |
| O  | 3.451525688  | 2.429963589  | 14.862750053 | O  | 3.360630512  | 1.856170416  | 14.692348480 | O  | 1.777390957  | 2.318921089  | 14.088196754 |
| O  | 3.840013266  | 4.721626759  | 13.797305107 | O  | 3.779129982  | 4.389168262  | 13.870284081 | O  | 4.556569099  | 3.454470158  | 13.394040108 |
| Cu | 3.341139078  | 3.009348392  | 12.977107048 | Cu | 3.277640820  | 2.721256733  | 12.964651108 | Cu | 2.677429914  | 2.846337318  | 12.454368591 |
| Cu | 4.452998638  | 3.974565983  | 15.557523727 | Cu | 4.926688194  | 4.315089226  | 15.435473442 | Cu | 5.137386799  | 4.044002533  | 15.082732201 |
| H  | 15.027941704 | 6.116863251  | 1.007752061  | H  | 14.987795830 | 6.140803337  | 1.024574161  | H  | 14.981025696 | 6.121601105  | 1.105644584  |
| H  | 2.636858940  | 0.885026574  | 11.504433632 | H  | 2.574284077  | 0.778698683  | 11.265543938 | H  | 2.727821827  | 0.218674779  | 12.253082275 |
| H  | 4.039515972  | 0.538554072  | 12.282845497 | H  | 3.913603783  | 0.343982041  | 12.126559258 | H  | 4.055840492  | 0.802155495  | 11.466639519 |
| H  | 2.621033192  | 0.557307363  | 13.108481407 | H  | 2.446578979  | 0.403378010  | 12.862707138 | H  | 3.981712341  | 0.881324649  | 13.103547096 |
| H  | 3.468362331  | 4.686695576  | 11.024450302 | H  | 3.388665438  | 4.568046570  | 11.073401451 | H  | 3.417993069  | 4.509672165  | 10.564827919 |
| H  | 4.715044498  | 3.634561539  | 10.874207497 | H  | 4.722359657  | 3.625264645  | 10.968785286 | H  | 4.349170685  | 3.181472301  | 10.433148384 |
| H  | 3.205630302  | 3.216514111  | 10.335633278 | H  | 3.294237852  | 3.118529558  | 10.321811676 | H  | 2.825994015  | 3.168472290  | 9.808106422  |
| H  | 14.252313614 | 5.379277706  | 10.339912415 | H  | 14.239446640 | 5.379302025  | 10.363499641 | H  | 14.245891571 | 5.382223606  | 10.515015602 |
| H  | 4.020316124  | 4.155283451  | 18.203413010 | H  | 2.832025051  | 4.095561504  | 17.050146103 | H  | 2.992787600  | 3.855490685  | 16.606418610 |
| H  | 2.939704657  | 3.147670746  | 17.439096451 | H  | 3.303471088  | 2.732440472  | 16.131874084 | H  | 2.853926659  | 2.806046724  | 15.304514885 |
| H  | 4.433329105  | 2.616700649  | 17.846063614 | H  | 4.055290222  | 3.148234606  | 17.602636337 | H  | 3.801737309  | 2.447566986  | 16.634788513 |
| H  | 5.685514450  | 6.259531975  | 15.569853783 | H  | 6.054082394  | 6.498834610  | 16.134298325 | H  | 5.870811939  | 6.291631699  | 16.103712082 |
| H  | 4.589216709  | 6.273692131  | 16.783405304 | H  | 4.787674904  | 6.195238113  | 17.128379822 | H  | 4.584180355  | 5.781249046  | 16.969776154 |
| H  | 5.992837906  | 5.465923786  | 16.975643158 | H  | 6.214873791  | 5.446644306  | 17.377424240 | H  | 6.065061569  | 5.171180725  | 17.267433167 |
| H  | 4.484957218  | 5.238198280  | 13.285243988 | H  | 4.109513760  | 5.053655624  | 13.241319656 | H  | 5.261848450  | 3.557558537  | 12.726560593 |
| H  | 3.875962257  | 1.580424428  | 15.071943283 | H  | 3.861404419  | 1.024471164  | 14.740251541 | H  | 1.423112750  | 1.415213704  | 14.117414474 |
| H  | 1.094788313  | 4.515533447  | 13.394546509 | H  | 0.930503428  | 4.186769485  | 13.413660049 | H  | 2.096892118  | 5.383769035  | 12.846555710 |
| H  | 0.308598936  | 3.287231445  | 12.634838104 | H  | 0.336224377  | 3.123414516  | 12.308079720 | H  | 0.853407502  | 4.739593506  | 11.976714134 |
| H  | 0.885004163  | 3.090602160  | 14.159233093 | H  | 0.647339582  | 2.636290073  | 13.843120575 | H  | 1.066279650  | 4.271606922  | 13.548661232 |
| H  | 6.509448051  | 2.625335455  | 14.070231438 | H  | 6.513153553  | 3.019134998  | 13.889140129 | H  | 7.274782181  | 3.017839193  | 14.146211624 |
| H  | 6.912182808  | 4.199429512  | 14.087010384 | H  | 7.057615280  | 4.561184883  | 13.820543289 | H  | 7.312821388  | 4.600936890  | 13.694919586 |
| H  | 7.319896698  | 3.232964516  | 15.338768005 | H  | 7.426541328  | 3.611109257  | 15.114291191 | H  | 7.786073685  | 4.170490265  | 15.212389946 |
| N  | 3.148751497  | 1.041355848  | 12.378187180 | N  | 3.036504745  | 0.873185396  | 12.172863007 | N  | 3.423493862  | 0.967912376  | 12.250971794 |
| N  | 3.706025600  | 3.692235231  | 11.090278625 | N  | 3.702230215  | 3.594930172  | 11.129523277 | N  | 3.385302544  | 3.487119436  | 10.605302811 |
| N  | 3.922951698  | 3.427805424  | 17.480314255 | N  | 3.624996185  | 3.524674892  | 16.753118515 | N  | 3.529016972  | 3.216273308  | 16.014595032 |
| N  | 5.253067017  | 5.674314976  | 16.285655975 | N  | 5.563373089  | 5.749633789  | 16.630516052 | N  | 5.430476189  | 5.452748299  | 16.496908188 |
| N  | 1.098042965  | 3.502712727  | 13.247474670 | N  | 0.997485638  | 3.221643448  | 13.081256866 | N  | 1.557324409  | 4.531137466  | 12.686299324 |
| N  | 6.562563419  | 3.442371845  | 14.683748245 | N  | 6.672725677  | 3.852992535  | 14.463729858 | N  | 7.095664501  | 3.967529297  | 14.483567238 |

**Table S8.** Cartesian coordinates of RC, TS, IM, and PC for NH<sub>2</sub>NO self-decomposition.

| Structure A |              |              |             | ts1 |              |              | Structure B |    |              |              |             |
|-------------|--------------|--------------|-------------|-----|--------------|--------------|-------------|----|--------------|--------------|-------------|
| Si          | 0.126935542  | 2.470517159  | 8.013442993 | Si  | 0.138879597  | 2.468534231  | 8.029371262 | Si | 0.157806396  | 2.441827536  | 8.039543152 |
| Si          | 7.941133976  | 0.656771064  | 2.979287386 | Si  | 7.951760292  | 0.659534574  | 2.988707781 | Si | 7.937094212  | 0.646656811  | 2.965903759 |
| Si          | 2.419070959  | 8.161301613  | 0.770132005 | Si  | 2.433354139  | 8.151018143  | 0.790373385 | Si | 2.427414417  | 8.143082619  | 0.779767036 |
| Si          | 5.530753613  | 8.303808212  | 1.043948054 | Si  | 5.538378716  | 8.300268173  | 1.055379391 | Si | 5.546506405  | 8.292058945  | 1.027628422 |
| Si          | 7.907699108  | 0.623101890  | 6.127501488 | Si  | 7.911434650  | 0.617500544  | 6.132910728 | Si | 7.935659409  | 0.624884844  | 6.111620903 |
| Si          | 0.126905441  | 5.637632847  | 8.203438759 | Si  | 0.157463610  | 5.629832745  | 8.224172592 | Si | 0.116442800  | 5.597784996  | 8.182619095 |
| Si          | 0.165856242  | 7.925550461  | 6.089161396 | Si  | 0.165098608  | 7.926204681  | 6.103682518 | Si | 0.185785055  | 7.914692402  | 6.060341835 |
| Si          | 5.584330559  | 0.443310916  | 8.258350372 | Si  | 5.586672306  | 0.441832840  | 8.268195152 | Si | 5.604557991  | 0.436297715  | 8.240238190 |
| Si          | 2.453398705  | 0.346597552  | 8.077112198 | Si  | 2.457583666  | 0.345366955  | 8.091948509 | Si | 2.477406025  | 0.329836071  | 8.020161629 |
| Si          | 0.138834447  | 7.969607830  | 2.998301983 | Si  | 0.143393964  | 7.973560810  | 3.010839224 | Si | 0.176876247  | 7.997797966  | 2.965690613 |
| Si          | 7.992717266  | 2.961902857  | 0.841234863 | Si  | 7.996555328  | 2.962633133  | 0.845899522 | Si | 8.001610756  | 2.951149702  | 0.821922719 |
| Si          | 9.571305275  | 2.447799206  | 8.073434830 | Si  | 9.572208405  | 2.447048664  | 8.077211380 | Si | 9.589894295  | 2.447503567  | 8.060656548 |
| Si          | 17.432695389 | 0.682505965  | 2.957473040 | Si  | 17.432018280 | 0.674420834  | 2.966144800 | Si | 17.437511444 | 0.692706347  | 2.972810268 |
| Si          | 11.827690125 | 8.182919502  | 0.811910748 | Si  | 11.832344055 | 8.182271004  | 0.812220812 | Si | 11.839271545 | 8.184258461  | 0.815125227 |
| Si          | 14.938962936 | 8.371100426  | 0.983908892 | Si  | 14.943937302 | 8.372905731  | 0.989289403 | Si | 14.939740181 | 8.371117592  | 1.010962009 |
| Si          | 17.350503922 | 0.641116202  | 6.069227695 | Si  | 17.356464386 | 0.639873862  | 6.079277992 | Si | 17.360460281 | 0.602955222  | 6.082739830 |
| Si          | 9.508690834  | 5.615464211  | 8.249505997 | Si  | 9.513582230  | 5.617397785  | 8.249847412 | Si | 9.533607483  | 5.618827343  | 8.246213913 |
| Si          | 9.566113472  | 7.918040752  | 6.115636826 | Si  | 9.576276779  | 7.917614460  | 6.114504814 | Si | 9.592088699  | 7.922560692  | 6.111238480 |
| Si          | 15.021571159 | 0.469612598  | 8.189949989 | Si  | 15.022076607 | 0.479873598  | 8.196501732 | Si | 15.042913437 | 0.450642347  | 8.192255020 |
| Si          | 11.894538879 | 0.345166445  | 8.050383568 | Si  | 11.895628929 | 0.347680271  | 8.052680016 | Si | 11.918170929 | 0.348839343  | 8.049495697 |
| Si          | 9.586473465  | 7.932694435  | 2.995976210 | Si  | 9.593101501  | 7.936102390  | 3.000852346 | Si | 9.589980125  | 7.924915791  | 2.994081020 |
| Si          | 17.363594055 | 2.980098963  | 0.794838011 | Si  | 17.358579636 | 2.984412193  | 0.806001365 | Si | 17.391239166 | 2.981016874  | 0.800932646 |
| Al          | 7.879945278  | 6.142812729  | 1.059864044 | Al  | 7.885631561  | 6.147762299  | 1.062261701 | Al | 7.904506683  | 6.135784149  | 1.055712104 |
| Al          | 17.416284561 | 6.122964382  | 1.067595720 | Al  | 17.425434113 | 6.120252609  | 1.079874873 | Al | 17.411306381 | 6.113170147  | 0.977054954 |
| O           | 1.566879511  | 1.709035635  | 8.127206802 | O   | 1.577804685  | 1.711820602  | 8.173930168 | O  | 1.601015806  | 1.693101764  | 8.155688286 |
| O           | 0.067421436  | 0.023036644  | 2.893033028 | O   | 0.070867509  | 0.028061479  | 2.896027565 | O  | 0.068210483  | 0.033898219  | 2.896762371 |
| O           | 8.099688530  | 2.087661743  | 2.225244045 | O   | 8.101483345  | 2.091684580  | 2.232642412 | O  | 8.100541115  | 2.073588848  | 2.204078197 |
| O           | 2.901975632  | 0.240611061  | 0.082779318 | O   | 2.913581610  | 0.222412750  | 0.088209353 | O  | 2.243631840  | -0.575160265 | 9.353986740 |
| O           | 1.470549107  | 8.049260139  | 2.076700211 | O   | 1.475148559  | 8.053355217  | 2.088991642 | O  | 1.561984777  | 8.183934212  | 2.143370867 |
| O           | -0.737507105 | 2.151098967  | 9.364195824 | O   | -0.055804770 | 2.906006813  | 0.006002630 | O  | 0.005672225  | 2.910543442  | 0.050675865 |
| O           | 6.358653545  | 6.952512741  | 0.934837162 | O   | 6.358903885  | 6.945148945  | 0.934372783 | O  | 6.386152267  | 6.948669910  | 0.926625967 |
| O           | 8.095752716  | 8.638974190  | 6.258270741 | O   | 8.103934288  | 8.635663033  | 6.254264832 | O  | 8.120523453  | 8.640084267  | 6.245589733 |
| O           | 6.478126526  | 0.383199692  | 6.879975319 | O   | 6.488170624  | 0.371219873  | 6.895222187 | O  | 6.513370514  | 0.382483661  | 6.873000622 |
| O           | 8.072438240  | 5.776332855  | 8.945816040 | O   | 8.080658913  | 5.787683487  | 8.950876236 | O  | 8.102489471  | 5.784601688  | 8.950144768 |
| O           | 0.036206931  | 6.446918011  | 6.770830154 | O   | 0.071415722  | 6.469557762  | 6.820154667 | O  | 0.176549911  | 6.483758450  | 6.819378376 |
| O           | 5.023779392  | 8.397234917  | 8.997346878 | O   | 5.022277355  | 8.397690773  | 9.011048317 | O  | 5.048354149  | 8.396036148  | 8.989375114 |
| O           | 1.404322863  | 6.239305496  | 9.048853874 | O   | 1.433398008  | 6.206975937  | 9.087704659 | O  | 1.278284788  | 6.144743919  | 9.204080582 |
| O           | 18.169275284 | 1.906079531  | 6.697469234 | O   | -0.654279470 | 1.896128178  | 6.711250305 | O  | 18.166957855 | 1.847347021  | 6.760874271 |
| O           | 6.715849876  | -0.175461993 | 2.318532228 | O   | 6.737072468  | -0.182518750 | 2.324992418 | O  | 6.015926361  | 9.209247589  | 2.313709259 |
| O           | 6.145794392  | 1.619054317  | 9.219106674 | O   | 6.147006512  | 1.621877313  | 9.225711823 | O  | 6.146474838  | 1.619139433  | 9.203675270 |
| O           | 17.972429276 | 6.800117493  | 2.545430183 | O   | 17.975955963 | 6.812071323  | 2.546607018 | O  | 18.092029572 | 6.840918541  | 2.358734846 |
| O           | 1.323984146  | 8.815741539  | 6.809443951 | O   | 1.312402487  | 8.837953568  | 6.816760540 | O  | 2.020726681  | -0.505071402 | 6.700081825 |
| O           | 0.604815960  | 7.722319126  | 4.542370796 | O   | 0.604031861  | 7.728477001  | 4.555879116 | O  | 0.566211581  | 7.666056156  | 4.508767605 |

|    |              |              |             |    |              |              |             |    |              |              |             |
|----|--------------|--------------|-------------|----|--------------|--------------|-------------|----|--------------|--------------|-------------|
| O  | 4.027335644  | 0.749269962  | 7.887135029 | O  | 4.031988144  | 0.746250808  | 7.888798714 | O  | 4.052884579  | 0.724615812  | 7.844204426 |
| O  | 7.630990982  | 4.446711540  | 1.257792830 | O  | 7.644697189  | 4.451211452  | 1.253907204 | O  | 7.655046940  | 4.439563751  | 1.233206272 |
| O  | 7.618141651  | 0.958100796  | 4.559325218 | O  | 7.616742611  | 0.960550308  | 4.566933155 | O  | 7.630741596  | 0.959042609  | 4.546670914 |
| O  | 3.949957609  | 8.002552032  | 1.266844749 | O  | 3.960889101  | 8.003795624  | 1.299000382 | O  | 3.971233845  | 7.952697754  | 1.215057135 |
| O  | 0.412394464  | 4.063307762  | 7.845664978 | O  | 0.428753376  | 4.057851791  | 7.847480297 | O  | 0.428340852  | 4.030095100  | 7.823309422 |
| O  | 11.026223183 | 1.715997458  | 8.145128250 | O  | 11.028745651 | 1.718807697  | 8.152885437 | O  | 11.044091225 | 1.715225935  | 8.148387909 |
| O  | 9.360898972  | -0.118361488 | 2.857178211 | O  | 9.378967285  | -0.105804212 | 2.875470161 | O  | 9.350661278  | -0.138152361 | 2.845643520 |
| O  | 17.455890656 | 2.087053061  | 2.160650253 | O  | 17.435096741 | 2.071316719  | 2.156544924 | O  | 17.447805405 | 2.096476793  | 2.171770096 |
| O  | 12.374855995 | 0.228898749  | 0.059458748 | O  | 12.374840736 | 0.228451893  | 0.060040612 | O  | 12.412466049 | 0.227851763  | 0.057342853 |
| O  | 10.974785805 | 8.209445953  | 2.181499243 | O  | 10.979504585 | 8.205480576  | 2.181756020 | O  | 10.969478607 | 8.216557503  | 2.172023296 |
| O  | 9.443437576  | 2.850818872  | 0.068852648 | O  | 9.445884705  | 2.848083973  | 0.072582372 | O  | 9.451586723  | 2.840482235  | 0.047905721 |
| O  | 15.693021774 | 6.850145340  | 0.779273093 | O  | 15.704594612 | 6.857272148  | 0.767846227 | O  | 15.675181389 | 6.838248730  | 0.810034394 |
| O  | 17.559341431 | 8.677410126  | 6.190413475 | O  | 17.548196793 | 8.666954041  | 6.204757690 | O  | 17.562194824 | 8.636681557  | 6.194310665 |
| O  | 15.941639900 | 0.411448658  | 6.858187199 | O  | 15.938150406 | 0.431801856  | 6.862532616 | O  | 15.939501762 | 0.363365531  | 6.848457813 |
| O  | 17.625194550 | 5.838859081  | 9.051444054 | O  | 17.638351440 | 5.805521965  | 9.055191040 | O  | 17.481517792 | 5.733781815  | 8.832759857 |
| O  | 9.514721870  | 6.460584164  | 6.839659691 | O  | 9.526032448  | 6.460041046  | 6.839109898 | O  | 9.543368340  | 6.465188026  | 6.836608410 |
| O  | 14.468857765 | 8.413906097  | 8.958873749 | O  | 14.472334862 | 8.427134514  | 8.969371796 | O  | 14.473377228 | 8.403478622  | 8.980337143 |
| O  | 10.726576805 | 6.198410034  | 9.197575569 | O  | 10.733800888 | 6.198064804  | 9.196885109 | O  | 10.750959396 | 6.201631069  | 9.195898056 |
| O  | 8.721488953  | 1.886244535  | 6.779830456 | O  | 8.729336739  | 1.879153013  | 6.782584190 | O  | 8.764936447  | 1.888434410  | 6.748145580 |
| O  | 15.644446373 | 9.064334869  | 2.249205828 | O  | 15.643486977 | 9.048814774  | 2.266807556 | O  | 15.643808365 | 9.074608803  | 2.271161318 |
| O  | 15.487000465 | 1.630141497  | 9.214716911 | O  | 15.483202934 | 1.648086548  | 9.214509964 | O  | 15.551877022 | 1.619257092  | 9.183280945 |
| O  | 8.821343422  | 6.630678177  | 2.460521460 | O  | 8.815583229  | 6.639554024  | 2.469620943 | O  | 8.834758759  | 6.612542629  | 2.468714237 |
| O  | 10.712491035 | 8.849228859  | 6.785948753 | O  | 10.721726418 | 8.853996277  | 6.783050537 | O  | 11.427621841 | -0.535873890 | 6.778100967 |
| O  | 9.967661858  | 7.699473381  | 4.566506863 | O  | 9.984505653  | 7.697478294  | 4.567312241 | O  | 9.989575386  | 7.704086781  | 4.561293125 |
| O  | 13.459653854 | 0.705104947  | 7.810840130 | O  | 13.460250854 | 0.714760900  | 7.818581581 | O  | 13.483819962 | 0.715881288  | 7.824341297 |
| O  | 16.970901489 | 4.472067833  | 1.224502444 | O  | 16.970729828 | 4.471760273  | 1.263546944 | O  | 16.962467194 | 4.471221924  | 1.200428963 |
| O  | 16.996006012 | 0.935711443  | 4.504466057 | O  | 17.002798080 | 0.941503882  | 4.513795376 | O  | 17.012950897 | 0.944360495  | 4.523605347 |
| O  | 13.397678375 | 7.976629734  | 1.239893079 | O  | 13.402600288 | 7.976381779  | 1.239773393 | O  | 13.400905609 | 7.969891548  | 1.271152973 |
| O  | 9.821663857  | 4.047234058  | 7.868485928 | O  | 9.818742752  | 4.046938419  | 7.869526386 | O  | 9.838899612  | 4.048985958  | 7.866086960 |
| O  | 15.823335648 | 4.252222538  | 6.804040909 | O  | 15.926388741 | 4.468186855  | 6.659683704 | O  | 15.494462967 | 4.521686554  | 6.858179569 |
| Cu | 7.049530029  | 5.221220493  | 5.580275059 | Cu | 7.036978245  | 5.203368187  | 5.581730366 | Cu | 7.050464153  | 5.208781719  | 5.587510109 |
| H  | 16.804151535 | 4.583230495  | 3.910636902 | H  | 16.708358765 | 4.464487076  | 3.760565996 | H  | 16.692638397 | 4.424362659  | 4.040039539 |
| H  | 17.560503006 | 5.125081539  | 5.442513466 | H  | 16.992128372 | 5.004187107  | 6.012016296 | H  | 16.238607407 | 5.138779640  | 7.101232052 |
| H  | 8.630745888  | 5.171634197  | 3.728346109 | H  | 8.609537125  | 5.171698093  | 3.722792625 | H  | 8.623712540  | 5.164091587  | 3.727591515 |
| H  | 9.103852272  | 4.108008385  | 4.921339035 | H  | 9.089888573  | 4.097905636  | 4.901883602 | H  | 9.092434883  | 4.084958076  | 4.909114361 |
| H  | 7.957864285  | 3.671090841  | 3.821200371 | H  | 7.938338280  | 3.670175791  | 3.805145502 | H  | 7.938032150  | 3.668230772  | 3.811486244 |
| H  | 6.511597157  | 6.146176815  | 7.724359035 | H  | 6.518161297  | 6.124371529  | 7.731588840 | H  | 6.531744480  | 6.133857727  | 7.738275051 |
| H  | 5.664360046  | 7.015983105  | 6.611741066 | H  | 5.655606270  | 6.991206646  | 6.629389286 | H  | 5.669158936  | 6.997664452  | 6.633256435 |
| H  | 5.089844704  | 5.562793255  | 7.120862007 | H  | 5.092393398  | 5.535385132  | 7.143519878 | H  | 5.108528614  | 5.540690422  | 7.147967339 |
| H  | 15.139421463 | 6.200834751  | 0.301500797 | H  | 15.162424088 | 6.223252773  | 0.257893860 | H  | 15.038071632 | 6.133983612  | 0.579489231 |
| N  | 16.801214218 | 4.663911819  | 4.924749851 | N  | 16.665988922 | 4.616103649  | 4.779331207 | N  | 16.642160416 | 4.748623371  | 5.021446228 |
| N  | 8.297533035  | 4.451363087  | 4.393292427 | N  | 8.280399323  | 4.445323467  | 4.382223129 | N  | 8.286981583  | 4.440881252  | 4.388131142 |
| N  | 5.943668365  | 6.064353466  | 6.864560604 | N  | 5.940941811  | 6.040823460  | 6.878687859 | N  | 5.956626892  | 6.047870159  | 6.883669853 |
| N  | 15.770525932 | 4.145297050  | 5.564402580 | N  | 15.679675102 | 4.125051498  | 5.412330627 | N  | 15.662405014 | 4.178724766  | 5.524281025 |

| ts2 |              |              |             | Structure C |              |              | ts3         |    |              |             |             |
|-----|--------------|--------------|-------------|-------------|--------------|--------------|-------------|----|--------------|-------------|-------------|
| Si  | 0.168374002  | 2.402345181  | 8.031788826 | Si          | 0.190472782  | 2.444307327  | 8.028848648 | Si | 0.181770802  | 2.474535227 | 8.007736206 |
| Si  | 7.935918331  | 0.601473391  | 2.953161955 | Si          | 7.982959270  | 0.617918968  | 2.892224073 | Si | 8.019325256  | 0.651422381 | 2.890310287 |
| Si  | 2.434888363  | 8.115037918  | 0.759940684 | Si          | 2.460730791  | 8.170310974  | 0.753511548 | Si | 2.488044500  | 8.189077377 | 0.741437852 |
| Si  | 5.545648098  | 8.243094444  | 1.022151589 | Si          | 5.578165531  | 8.257079124  | 0.947872043 | Si | 5.596183300  | 8.297393799 | 0.936983347 |
| Si  | 7.943816662  | 0.597264707  | 6.095199108 | Si          | 7.967853069  | 0.602577865  | 6.037125111 | Si | 7.965263844  | 0.625985384 | 6.031363487 |
| Si  | 0.125625014  | 5.550514698  | 8.162701607 | Si          | 0.115061879  | 5.599976540  | 8.154818535 | Si | 0.159243643  | 5.646033764 | 8.167537689 |
| Si  | 0.174207687  | 7.863266945  | 6.042842865 | Si          | 0.190731883  | 7.902678013  | 6.039014339 | Si | 0.214845002  | 7.923916817 | 6.045255184 |
| Si  | 5.610607624  | 0.390034080  | 8.217127800 | Si          | 5.631471634  | 0.423758328  | 8.160960197 | Si | 5.632996082  | 0.478646278 | 8.159354210 |
| Si  | 2.492611885  | 0.283524096  | 8.000331879 | Si          | 2.517814636  | 0.332079649  | 7.984329700 | Si | 2.521605492  | 0.361373365 | 8.008525848 |
| Si  | 0.164539695  | 7.978577614  | 2.951073885 | Si          | 0.213426813  | 8.038393021  | 2.943812847 | Si | 0.209956586  | 8.023915291 | 2.951223612 |
| Si  | 8.008263588  | 2.902582407  | 0.795666575 | Si          | 8.030354500  | 2.929350853  | 0.747551560 | Si | 8.041307449  | 2.973354340 | 0.751108885 |
| Si  | 9.584588051  | 2.411349297  | 8.031188011 | Si          | 9.615063667  | 2.421452522  | 7.986705780 | Si | 9.619457245  | 2.447998524 | 7.979132175 |
| Si  | 17.433885574 | 0.642202377  | 2.965333462 | Si          | 17.455974579 | 0.685547829  | 2.969568491 | Si | 17.470561981 | 0.681140661 | 2.936841249 |
| Si  | 11.858945847 | 8.158569336  | 0.808328629 | Si          | 11.891692162 | 8.148386002  | 0.730471373 | Si | 11.899724007 | 8.168163300 | 0.722385883 |
| Si  | 14.959157944 | 8.339015961  | 1.019738674 | Si          | 14.996375084 | 8.376551628  | 1.031921506 | Si | 15.011734009 | 8.365806580 | 0.988540769 |
| Si  | 17.353599548 | 0.575118601  | 6.071344376 | Si          | 17.385835648 | 0.622678101  | 6.073889256 | Si | 17.396949768 | 0.641897559 | 6.051933765 |
| Si  | 9.542312622  | 5.580128193  | 8.237094879 | Si          | 9.593330383  | 5.595978737  | 8.171554565 | Si | 9.593715668  | 5.614470482 | 8.159903526 |
| Si  | 9.612000465  | 7.868711948  | 6.097997189 | Si          | 9.635155678  | 7.896781921  | 6.034387589 | Si | 9.628475189  | 7.914379597 | 6.029689312 |
| Si  | 15.039655685 | 0.482063770  | 8.182971954 | Si          | 15.068399429 | 0.497737527  | 8.187798500 | Si | 15.072713852 | 0.495719314 | 8.168642998 |
| Si  | 11.926463127 | 0.306363404  | 8.026685715 | Si          | 11.944062233 | 0.321495295  | 7.984143734 | Si | 11.943553925 | 0.340313375 | 7.982534409 |
| Si  | 9.594010353  | 7.883826733  | 2.977270126 | Si          | 9.595408440  | 7.887478352  | 2.926759005 | Si | 9.612731934  | 7.929827690 | 2.924851656 |
| Si  | 17.400995255 | 2.963425159  | 0.779137671 | Si          | 17.419382095 | 2.992715836  | 0.778141499 | Si | 17.419019699 | 3.000469923 | 0.762819707 |
| Al  | 7.908448219  | 6.089458466  | 1.037814140 | Al          | 7.931120872  | 6.114896297  | 1.002512813 | Al | 7.928422451  | 6.152360916 | 0.987111092 |
| Al  | 17.369375229 | 6.098573208  | 0.978336990 | Al          | 17.408576965 | 6.138612270  | 0.978539467 | Al | 17.433841705 | 6.158417702 | 1.014812469 |
| O   | 1.609318018  | 1.645136833  | 8.100023270 | O           | 1.636194229  | 1.692463636  | 8.101346970 | O  | 1.618585825  | 1.711431980 | 8.079963684 |
| O   | 0.093312949  | 0.035893351  | 2.926010132 | O           | 0.113836378  | 0.079471081  | 2.905730724 | O  | 0.132098898  | 0.080597505 | 2.871226311 |
| O   | 8.096722603  | 2.019539118  | 2.176141024 | O           | 8.115650177  | 2.045330763  | 2.126913786 | O  | 8.128766060  | 2.074751616 | 2.118871927 |
| O   | 2.286223412  | -0.586199641 | 9.360891342 | O           | 2.340706825  | -0.530606866 | 9.351696968 | O  | 3.036257505  | 0.264240921 | 0.028548786 |
| O   | 1.542349935  | 8.130819321  | 2.105209112 | O           | 1.604149580  | 8.230828285  | 2.123637199 | O  | 1.571081519  | 8.149083138 | 2.071829319 |
| O   | 0.029130103  | 2.868087053  | 0.045800794 | O           | 0.040210381  | 2.879863739  | 0.030912928 | O  | -0.660963416 | 2.141835213 | 9.365659714 |
| O   | 6.385728836  | 6.898511887  | 0.920616686 | O           | 6.416929722  | 6.915673256  | 0.776365101 | O  | 6.413455009  | 6.949171543 | 0.707865655 |
| O   | 8.173738480  | 8.644079208  | 6.253097534 | O           | 8.173095703  | 8.631718636  | 6.171492577 | O  | 8.164676666  | 8.651037216 | 6.163838387 |
| O   | 6.528791428  | 0.310408652  | 6.856235504 | O           | 6.551740646  | 0.335633337  | 6.802139759 | O  | 6.539273739  | 0.381726146 | 6.790826321 |
| O   | 8.102723122  | 5.738420963  | 8.930315018 | O           | 8.222144127  | 5.793229103  | 8.963757515 | O  | 8.224180222  | 5.798080921 | 8.952496529 |
| O   | 0.102303565  | 6.405782223  | 6.765598297 | O           | 0.127969950  | 6.442780495  | 6.752165318 | O  | 0.126737118  | 6.458519459 | 6.742815018 |
| O   | 5.039799690  | 8.359675407  | 8.989385605 | O           | 5.058025360  | 8.392974854  | 8.929006577 | O  | 5.050686836  | 8.448689461 | 8.926253319 |
| O   | 1.300806522  | 6.152602196  | 9.129972458 | O           | 1.270853996  | 6.218945980  | 9.140833855 | O  | 1.397485018  | 6.249199867 | 9.067656517 |
| O   | 18.144407272 | 1.822469234  | 6.763364315 | O           | -0.652946353 | 1.878078580  | 6.740853786 | O  | 18.160652161 | 1.936902046 | 6.708699703 |
| O   | 6.016771793  | 9.158370018  | 2.307652712 | O           | 6.090481758  | 9.137479782  | 2.242887020 | O  | 6.155224800  | 9.142333984 | 2.231523752 |
| O   | 6.153647900  | 1.583867788  | 9.166982651 | O           | 6.184304237  | 1.609126091  | 9.114844322 | O  | 6.196172237  | 1.661760569 | 9.108738899 |
| O   | 18.036214828 | 6.857794285  | 2.353431702 | O           | 18.126588821 | 6.896204948  | 2.325562716 | O  | 18.067474365 | 6.870973587 | 2.438671589 |
| O   | 1.332884550  | 8.791238785  | 6.717233181 | O           | 1.345947981  | 8.832589149  | 6.715647221 | O  | 1.360124111  | 8.839441299 | 6.753946781 |
| O   | 0.567814887  | 7.634854317  | 4.493632317 | O           | 0.591825843  | 7.690777302  | 4.488921165 | O  | 0.644979775  | 7.736139297 | 4.497372627 |

|    |              |              |             |    |              |              |             |    |              |              |             |
|----|--------------|--------------|-------------|----|--------------|--------------|-------------|----|--------------|--------------|-------------|
| O  | 4.063502312  | 0.685549200  | 7.795789242 | O  | 4.088763714  | 0.727135360  | 7.742873669 | O  | 4.084233761  | 0.782413900  | 7.759366989 |
| O  | 7.663778305  | 4.390130043  | 1.215296388 | O  | 7.681297302  | 4.418070793  | 1.155288219 | O  | 7.690364361  | 4.456354618  | 1.184416413 |
| O  | 7.620083809  | 0.915918648  | 4.531592369 | O  | 7.659996986  | 0.933236837  | 4.470738411 | O  | 7.664896965  | 0.957419515  | 4.463540554 |
| O  | 3.969461441  | 7.903384686  | 1.214720249 | O  | 4.006335258  | 7.920526981  | 1.168130279 | O  | 4.026179790  | 7.989297867  | 1.210855603 |
| O  | 0.469038010  | 3.988392830  | 7.812793255 | O  | 0.483640790  | 4.034273148  | 7.838739872 | O  | 0.463664711  | 4.065790176  | 7.830379009 |
| O  | 11.027349472 | 1.655491829  | 8.077721596 | O  | 11.064380646 | 1.685785770  | 8.059506416 | O  | 11.066200256 | 1.704577565  | 8.056975365 |
| O  | 9.353263855  | -0.176641315 | 2.852028847 | O  | 9.421549797  | -0.128693342 | 2.785837173 | O  | 9.475082397  | -0.063125387 | 2.804123402 |
| O  | 17.391344070 | 1.991855264  | 2.085922480 | O  | 17.413675308 | 2.039828777  | 2.100398779 | O  | 17.422962189 | 2.050382614  | 2.087840319 |
| O  | 12.434617043 | 0.207788542  | 0.046253357 | O  | 11.709333420 | -0.554181933 | 9.345199585 | O  | 11.728981018 | -0.521319628 | 9.355500221 |
| O  | 10.969560623 | 8.184842110  | 2.155663013 | O  | 10.943705559 | 8.076004028  | 2.026831865 | O  | 10.970183372 | 8.098168373  | 2.033958435 |
| O  | 9.456790924  | 2.777081251  | 0.018085524 | O  | 8.790438652  | 2.072515011  | 9.340681076 | O  | 8.798984528  | 2.113280773  | 9.340669632 |
| O  | 15.733139038 | 6.902833462  | 0.588618636 | O  | 15.747470856 | 6.914118767  | 0.691499054 | O  | 15.755776405 | 6.895598412  | 0.680427253 |
| O  | 17.557899475 | 8.606846809  | 6.183768272 | O  | 17.581897736 | 8.651265144  | 6.183617115 | O  | 17.608379364 | 8.685503960  | 6.175643444 |
| O  | 15.929288864 | 0.301271081  | 6.832178593 | O  | 15.967567444 | 0.368592918  | 6.844529152 | O  | 15.972026825 | 0.403296649  | 6.818326950 |
| O  | 17.499814987 | 5.657260418  | 8.829685211 | O  | 17.479473114 | 5.700349808  | 8.800971031 | O  | 17.600305557 | 5.806970596  | 8.928599358 |
| O  | 9.533651352  | 6.406103611  | 6.812039852 | O  | 9.550034523  | 6.433681965  | 6.756799698 | O  | 9.547908783  | 6.451455116  | 6.745824814 |
| O  | 14.445440292 | 8.488903999  | 9.043579102 | O  | 14.501693726 | 8.504281998  | 9.047675133 | O  | 14.533470154 | 8.490626335  | 9.002022743 |
| O  | 10.744704247 | 6.189965248  | 9.181668282 | O  | 10.904408455 | 6.164607048  | 9.036579132 | O  | 10.893873215 | 6.197284698  | 9.028559685 |
| O  | 8.733964920  | 1.894155979  | 6.714758873 | O  | 8.772161484  | 1.881499052  | 6.677892208 | O  | 8.773307800  | 1.896988630  | 6.678020954 |
| O  | 15.659341812 | 8.968232155  | 2.324886799 | O  | 15.659797668 | 9.022278786  | 2.344393730 | O  | 15.680737495 | 9.019163132  | 2.300536871 |
| O  | 15.564316750 | 1.709876418  | 9.084351540 | O  | 15.565986633 | 1.728884220  | 9.105701447 | O  | 15.559000015 | 1.725631237  | 9.100730896 |
| O  | 8.834965706  | 6.574293137  | 2.449702024 | O  | 8.750947952  | 6.598697186  | 2.479812622 | O  | 8.729549408  | 6.675940514  | 2.457541466 |
| O  | 10.801164627 | 8.755214691  | 6.772217274 | O  | 10.783926964 | 8.816518784  | 6.714639187 | O  | 10.771512032 | 8.834872246  | 6.720445633 |
| O  | 9.995794296  | 7.650667191  | 4.544695854 | O  | 10.042820930 | 7.690560818  | 4.484611511 | O  | 10.049867630 | 7.704726696  | 4.482432365 |
| O  | 13.481466293 | 0.714772105  | 7.783279896 | O  | 13.505128860 | 0.715110242  | 7.788664818 | O  | 13.510492325 | 0.716699302  | 7.769095898 |
| O  | 17.027513504 | 4.443625927  | 1.218990922 | O  | 17.064287186 | 4.481468678  | 1.204391122 | O  | 17.073398590 | 4.493103504  | 1.181320548 |
| O  | 17.013298035 | 0.934428394  | 4.515789032 | O  | 17.042835236 | 0.967581689  | 4.518643379 | O  | 17.055212021 | 0.966080904  | 4.489369392 |
| O  | 13.412046432 | 7.960786343  | 1.280194521 | O  | 13.433817863 | 7.995767117  | 1.234431028 | O  | 13.449706078 | 7.998991013  | 1.205349445 |
| O  | 9.856220245  | 4.009046555  | 7.869981289 | O  | 9.886066437  | 4.023061275  | 7.802782536 | O  | 9.879451752  | 4.045365334  | 7.771589279 |
| O  | 13.279326439 | 5.947945118  | 6.777529716 | O  | 13.014503479 | 5.392724037  | 7.207323551 | O  | 12.953665733 | 5.234370232  | 7.189832687 |
| Cu | 7.046068668  | 5.198792458  | 5.562437534 | Cu | 7.038140297  | 5.206898212  | 5.588770866 | Cu | 6.970284939  | 5.261574268  | 5.627555847 |
| H  | 16.370399475 | 5.781750679  | 7.051568985 | H  | 16.066749573 | 5.523016930  | 7.233423710 | H  | 15.844541550 | 4.040448189  | 6.643177032 |
| H  | 13.082613945 | 6.900518894  | 6.649930954 | H  | 12.444426537 | 5.556655884  | 8.002082825 | H  | 12.431976318 | 5.617511749  | 7.939706802 |
| H  | 8.617009163  | 5.119817257  | 3.703916073 | H  | 8.570302010  | 5.133856773  | 3.706386089 | H  | 8.519603729  | 5.209117413  | 3.743611336 |
| H  | 9.055594444  | 4.021009922  | 4.879082203 | H  | 9.055851936  | 4.046994686  | 4.875054359 | H  | 9.019112587  | 4.146453857  | 4.926005840 |
| H  | 7.892532349  | 3.643347740  | 3.777735472 | H  | 7.873687744  | 3.642796993  | 3.805826664 | H  | 7.846967220  | 3.710021019  | 3.855887175 |
| H  | 6.556847095  | 6.116991997  | 7.718933582 | H  | 6.473894596  | 6.195099354  | 7.731469154 | H  | 6.194498062  | 6.122641563  | 7.797723770 |
| H  | 5.721722126  | 7.023611546  | 6.626430511 | H  | 5.674988270  | 7.032716751  | 6.570734978 | H  | 5.623379230  | 7.084181786  | 6.607049942 |
| H  | 5.113716125  | 5.579798222  | 7.122509480 | H  | 5.077589035  | 5.598738670  | 7.105160713 | H  | 4.874637127  | 5.660081863  | 6.937499046 |
| H  | 14.804610252 | 5.970863819  | 8.953639984 | H  | 14.681674957 | 5.827237606  | 9.126919746 | H  | 14.660260201 | 5.686310768  | 9.191666603 |
| N  | 15.477814674 | 5.839491844  | 6.506990433 | N  | 15.145230293 | 5.403745174  | 6.761434078 | N  | 15.108471870 | 4.478053093  | 7.167517662 |
| N  | 8.259782791  | 4.402721882  | 4.360794067 | N  | 8.242325783  | 4.412308216  | 4.373589993 | N  | 8.200290680  | 4.491052628  | 4.417783260 |
| N  | 5.978504181  | 6.060927868  | 6.862732410 | N  | 5.941951275  | 6.086089611  | 6.855756760 | N  | 5.792864323  | 6.103239059  | 6.849458694 |
| N  | 14.599524498 | 5.913491249  | 7.353131771 | N  | 14.311171532 | 5.512100220  | 7.661753654 | N  | 14.300909042 | 5.032354832  | 7.826302052 |

| Structure D |              |              |             | ts4 |              |              | Structure E |    |              |              |             |
|-------------|--------------|--------------|-------------|-----|--------------|--------------|-------------|----|--------------|--------------|-------------|
| Si          | 0.217433929  | 2.497099161  | 7.961150646 | Si  | 0.210461318  | 2.488007069  | 8.031271935 | Si | 0.187783301  | 2.520504951  | 8.012378693 |
| Si          | 8.051229477  | 0.666672349  | 2.875082254 | Si  | 8.022221565  | 0.650236130  | 2.933099985 | Si | 7.997866631  | 0.669117689  | 2.960429430 |
| Si          | 2.519199371  | 8.185693741  | 0.709915698 | Si  | 2.501028061  | 8.207905769  | 0.758399606 | Si | 2.480383873  | 8.215117455  | 0.773313046 |
| Si          | 5.618176460  | 8.304167747  | 0.918034434 | Si  | 5.606214046  | 8.298088074  | 0.969378233 | Si | 5.586489201  | 8.324158669  | 1.006800175 |
| Si          | 7.985315800  | 0.637491047  | 6.010896206 | Si  | 7.987269878  | 0.614884257  | 6.071797848 | Si | 7.973647118  | 0.643197656  | 6.103453636 |
| Si          | 0.218814015  | 5.659934044  | 8.142557144 | Si  | 0.161151886  | 5.665972710  | 8.176906586 | Si | 0.143721819  | 5.669899464  | 8.191959381 |
| Si          | 0.235352069  | 7.942980289  | 6.024589062 | Si  | 0.227701604  | 7.942997932  | 6.054837227 | Si | 0.218969643  | 7.962962627  | 6.066633701 |
| Si          | 5.648386478  | 0.495740116  | 8.148024559 | Si  | 5.647205353  | 0.482682347  | 8.193521500 | Si | 5.629246712  | 0.513934016  | 8.221574783 |
| Si          | 2.537827730  | 0.379845440  | 8.002240181 | Si  | 2.542454243  | 0.381890774  | 8.016627312 | Si | 2.522598982  | 0.395129144  | 8.026855469 |
| Si          | 0.233034208  | 8.016542435  | 2.939099550 | Si  | 0.229972482  | 8.029778481  | 2.957910299 | Si | 0.224261001  | 8.020706177  | 2.990155220 |
| Si          | 8.056916237  | 2.992385387  | 0.735467613 | Si  | 8.048038483  | 2.976878881  | 0.791721523 | Si | 8.031228065  | 2.998372555  | 0.817418694 |
| Si          | 9.647084236  | 2.464456081  | 7.960407257 | Si  | 9.649979591  | 2.440815687  | 8.030846596 | Si | 9.632745743  | 2.462357521  | 8.060940742 |
| Si          | 17.520627975 | 0.717715979  | 2.901440144 | Si  | 17.484487534 | 0.731463432  | 2.972016811 | Si | 17.472257614 | 0.723709166  | 2.985749245 |
| Si          | 11.936301231 | 8.171083450  | 0.698049009 | Si  | 11.888889313 | 8.150632858  | 0.776855528 | Si | 11.874523163 | 8.187870026  | 0.799998343 |
| Si          | 15.046541214 | 8.386273384  | 0.938651145 | Si  | 15.004543304 | 8.389693260  | 1.030168056 | Si | 14.985887527 | 8.390729904  | 1.040957928 |
| Si          | 17.426395416 | 0.656921387  | 6.011607647 | Si  | 17.413846970 | 0.648100972  | 6.082946777 | Si | 17.389009476 | 0.674209118  | 6.078578472 |
| Si          | 9.619057655  | 5.632106781  | 8.137067795 | Si  | 9.625789642  | 5.595931053  | 8.207746506 | Si | 9.587006569  | 5.627211571  | 8.232506752 |
| Si          | 9.652782440  | 7.940610886  | 6.005903721 | Si  | 9.638533592  | 7.904744148  | 6.077290058 | Si | 9.620638847  | 7.928853512  | 6.104977131 |
| Si          | 15.101652145 | 0.492400765  | 8.129987717 | Si  | 15.108866692 | 0.437439919  | 8.208290100 | Si | 15.089777946 | 0.453642964  | 8.213000298 |
| Si          | 11.972494125 | 0.364739656  | 7.967883587 | Si  | 11.949782372 | 0.319837570  | 8.045054436 | Si | 11.944403648 | 0.348603308  | 8.060221672 |
| Si          | 9.636370659  | 7.946766853  | 2.908709526 | Si  | 9.616367340  | 7.931073189  | 2.969854593 | Si | 9.612455368  | 7.952216148  | 2.995395184 |
| Si          | 17.456752777 | 3.016247034  | 0.729477942 | Si  | 17.453096390 | 2.997943163  | 0.788541198 | Si | 17.439586639 | 3.005118370  | 0.794417262 |
| Al          | 7.947388649  | 6.171770096  | 0.971789479 | Al  | 7.940319061  | 6.148182869  | 1.003327370 | Al | 7.930839539  | 6.171724796  | 1.039499521 |
| Al          | 17.487670898 | 6.163243294  | 1.020079970 | Al  | 17.465974808 | 6.158441067  | 1.001563549 | Al | 17.446636200 | 6.143467426  | 1.037316918 |
| O           | 1.662311196  | 1.744636297  | 8.075259209 | O   | 1.655890703  | 1.740697265  | 8.119358063 | O  | 1.613840818  | 1.741348743  | 8.110321999 |
| O           | 0.164092690  | 0.076293930  | 2.849226713 | O   | 0.108932644  | 0.060492590  | 2.873875618 | O  | 0.093459040  | 0.044908062  | 2.962733746 |
| O           | 8.141913414  | 2.089300632  | 2.099806309 | O   | 8.120750427  | 2.068557262  | 2.153395414 | O  | 8.096725464  | 2.087449074  | 2.178856134 |
| O           | 3.057818651  | 0.272504777  | 0.019142192 | O   | 3.058700085  | 0.271978825  | 0.027460519 | O  | 3.032214403  | 0.275333822  | 0.032198008 |
| O           | 1.569992185  | 8.109115601  | 2.016140938 | O   | 1.591596723  | 8.209356308  | 2.093218565 | O  | 1.575693607  | 8.223031998  | 2.113397121 |
| O           | -0.640459836 | 2.169765234  | 9.309514046 | O   | 0.058470901  | 2.902114868  | 0.030716604 | O  | 0.035903517  | 2.976997614  | 0.018035902 |
| O           | 6.428472042  | 6.952643871  | 0.645556927 | O   | 6.426528931  | 6.953868389  | 0.718462408 | O  | 6.421176434  | 6.985498905  | 0.787785232 |
| O           | 8.179662704  | 8.656859398  | 6.124728680 | O   | 8.166261673  | 8.625847816  | 6.192867279 | O  | 8.149193764  | 8.651831627  | 6.227669716 |
| O           | 6.566732407  | 0.407308221  | 6.784524918 | O   | 6.566802502  | 0.365113258  | 6.837879658 | O  | 6.548654079  | 0.393680513  | 6.862158298 |
| O           | 8.279413223  | 5.819869041  | 8.966114998 | O   | 8.227469444  | 5.754572868  | 8.958311081 | O  | 8.180110931  | 5.785096169  | 8.968873024 |
| O           | 0.143388510  | 6.484231472  | 6.728579521 | O   | 0.164594680  | 6.482435226  | 6.760214806 | O  | 0.122291386  | 6.521775246  | 6.800759792 |
| O           | 5.064178467  | 8.461432457  | 8.911114693 | O   | 5.050018311  | 8.454045296  | 8.962829590 | O  | 5.033727169  | 8.494092941  | 9.007944107 |
| O           | 1.503027201  | 6.259958744  | 8.994525909 | O   | 1.385111332  | 6.266077995  | 9.100552559 | O  | 1.361447692  | 6.266260147  | 9.124720573 |
| O           | -0.607139468 | 1.915063500  | 6.664950371 | O   | -0.627986550 | 1.910263777  | 6.743782043 | O  | -0.673862576 | 1.949610472  | 6.736963272 |
| O           | 6.211942673  | 9.128679276  | 2.210578680 | O   | 6.161269188  | 9.135019302  | 2.272297144 | O  | 6.116609573  | 9.168627739  | 2.316022635 |
| O           | 6.210756302  | 1.676499844  | 9.099254608 | O   | 6.211027622  | 1.665428162  | 9.138326645 | O  | 6.187611580  | 1.709841847  | 9.157431602 |
| O           | 18.067548752 | 6.861480713  | 2.474776268 | O   | 18.145391464 | 6.845503807  | 2.414340734 | O  | 18.131246567 | 6.847026348  | 2.435935974 |
| O           | 2.061698437  | -0.532718062 | 6.746969700 | O   | 2.059159994  | -0.517266750 | 6.751269341 | O  | 2.057045460  | -0.500945807 | 6.753338337 |
| O           | 0.699995995  | 7.763405800  | 4.481958866 | O   | 0.652248740  | 7.746792793  | 4.505742550 | O  | 0.662660539  | 7.724503040  | 4.529438496 |

|    |              |              |             |    |              |              |             |    |              |              |             |
|----|--------------|--------------|-------------|----|--------------|--------------|-------------|----|--------------|--------------|-------------|
| O  | 4.103806496  | 0.798430800  | 7.749285221 | O  | 4.107445240  | 0.796725690  | 7.774224281 | O  | 4.086333275  | 0.823124230  | 7.798398972 |
| O  | 7.706450462  | 4.476044178  | 1.166632175 | O  | 7.688459873  | 4.455615997  | 1.232235670 | O  | 7.689071655  | 4.478253365  | 1.267583609 |
| O  | 7.675509930  | 0.975265384  | 4.445273876 | O  | 7.670335293  | 0.962103426  | 4.508414745 | O  | 7.670587540  | 0.985030293  | 4.538949966 |
| O  | 4.052798271  | 8.003011703  | 1.218028903 | O  | 4.035157204  | 7.985741138  | 1.230423808 | O  | 4.014177799  | 7.991253853  | 1.239727974 |
| O  | 0.510844529  | 4.085508347  | 7.776773453 | O  | 0.469856679  | 4.082996845  | 7.864680290 | O  | 0.477437794  | 4.106831074  | 7.816635609 |
| O  | 11.101695061 | 1.734806418  | 8.067724228 | O  | 11.103733063 | 1.705191612  | 8.129355431 | O  | 11.087015152 | 1.726063967  | 8.146411896 |
| O  | 9.521117210  | -0.028233618 | 2.808215857 | O  | 9.482461929  | -0.057405114 | 2.850252151 | O  | 9.446888924  | -0.058155999 | 2.865357637 |
| O  | 17.532806396 | 2.102827072  | 2.078868866 | O  | 17.501451492 | 2.142305136  | 2.178403139 | O  | 17.543769836 | 2.099025965  | 2.143607616 |
| O  | 11.757001877 | -0.521164894 | 9.327880859 | O  | 12.380915642 | 0.198524401  | 0.040604208 | O  | 12.409552574 | 0.242268682  | 0.069898061 |
| O  | 10.989281654 | 8.082668304  | 1.998818398 | O  | 10.997378349 | 8.104761124  | 2.118693590 | O  | 10.989258766 | 8.149844170  | 2.144478321 |
| O  | 8.812366486  | 2.145339966  | 9.315839767 | O  | 9.504030228  | 2.874456167  | 0.025332425 | O  | 9.483895302  | 2.878165722  | 0.047415093 |
| O  | 15.804312706 | 6.911600590  | 0.687088907 | O  | 15.715028763 | 6.850358009  | 0.915311575 | O  | 15.704328537 | 6.851776123  | 0.912142634 |
| O  | 17.618921280 | 8.687235832  | 6.131564140 | O  | 17.610742569 | 8.680275917  | 6.183958054 | O  | 17.610860825 | 8.723927498  | 6.156254292 |
| O  | 15.997484207 | 0.426257730  | 6.779075623 | O  | 15.987320900 | 0.401419342  | 6.845972538 | O  | 15.975998878 | 0.397943795  | 6.855058670 |
| O  | -1.130292416 | 5.841711998  | 8.983869553 | O  | 17.584777832 | 5.843256474  | 8.912328720 | O  | 17.569679260 | 5.789514542  | 8.941937447 |
| O  | 9.574169159  | 6.479675293  | 6.730218410 | O  | 9.592948914  | 6.445432186  | 6.797443867 | O  | 9.557532310  | 6.467160225  | 6.818571568 |
| O  | 14.516696930 | 8.447351456  | 8.906348228 | O  | 14.604199409 | 8.395678520  | 8.992025375 | O  | 14.563155174 | 8.416637421  | 9.008847237 |
| O  | 10.949302673 | 6.196003914  | 8.988832474 | O  | 10.878519058 | 6.173306942  | 9.121474266 | O  | 10.832086563 | 6.224644184  | 9.139014244 |
| O  | 8.819372177  | 1.893424153  | 6.656772137 | O  | 8.818798065  | 1.867000103  | 6.726785660 | O  | 8.801697731  | 1.900019169  | 6.753436565 |
| O  | 15.718302727 | 9.100180626  | 2.210693359 | O  | 15.649207115 | 9.154531479  | 2.291731834 | O  | 15.651859283 | 9.132059097  | 2.304519176 |
| O  | 15.590007782 | 1.668022275  | 9.119731903 | O  | 15.596344948 | 1.634131789  | 9.184406281 | O  | 15.590152740 | 1.648554325  | 9.182342529 |
| O  | 8.721412659  | 6.706598282  | 2.459572792 | O  | 8.733710289  | 6.686749458  | 2.477824450 | O  | 8.769434929  | 6.684899807  | 2.495882988 |
| O  | 11.472939491 | -0.514645338 | 6.695171356 | O  | 10.767202377 | 8.854678154  | 6.757842541 | O  | 11.451826096 | -0.533547401 | 6.787964344 |
| O  | 10.092956543 | 7.716342449  | 4.462944508 | O  | 10.044342995 | 7.687459946  | 4.527758121 | O  | 10.027655602 | 7.716838837  | 4.556620121 |
| O  | 13.534292221 | 0.750925958  | 7.742216110 | O  | 13.531807899 | 0.657436609  | 7.867838860 | O  | 13.521096230 | 0.699471712  | 7.860853672 |
| O  | 17.074567795 | 4.504882813  | 1.134461761 | O  | 17.047357559 | 4.497175694  | 1.171607375 | O  | 16.997556686 | 4.486200809  | 1.233277917 |
| O  | 17.071905136 | 0.973660946  | 4.448791027 | O  | 17.072622299 | 0.991589308  | 4.524864674 | O  | 17.021186829 | 1.038277149  | 4.524634838 |
| O  | 13.485023499 | 8.006024361  | 1.181943655 | O  | 13.449866295 | 8.028665543  | 1.260080099 | O  | 13.435004234 | 8.019673347  | 1.269998074 |
| O  | 9.906068802  | 4.065062046  | 7.731846333 | O  | 9.931180000  | 4.030937672  | 7.799894333 | O  | 9.906424522  | 4.057570457  | 7.858517170 |
| O  | 12.926121712 | 5.026712894  | 7.378968239 | O  | 15.097039223 | 4.685214996  | 3.449674845 | O  | 15.387317657 | 3.982143879  | 3.688597918 |
| Cu | 6.830528259  | 5.313475132  | 5.690702915 | Cu | 6.902884483  | 5.328591347  | 5.682960510 | Cu | 6.959117413  | 5.335102558  | 5.656283855 |
| H  | 14.615408897 | 4.000460148  | 6.325499058 | H  | 13.764179230 | 3.984696865  | 3.459408998 | H  | 15.792695999 | 3.315536499  | 4.269782543 |
| H  | 12.370560646 | 5.467656136  | 8.079738617 | H  | 15.963011742 | 4.294444084  | 3.186268806 | H  | 16.068632126 | 4.146505356  | 3.005607128 |
| H  | 8.401000023  | 5.298352242  | 3.799010277 | H  | 8.455587387  | 5.252382278  | 3.792441607 | H  | 8.520109177  | 5.243476868  | 3.782545090 |
| H  | 8.914601326  | 4.253890514  | 4.986768723 | H  | 8.958975792  | 4.215375423  | 4.994051933 | H  | 9.003913879  | 4.192556858  | 4.981138706 |
| H  | 7.750853062  | 3.790672779  | 3.920975447 | H  | 7.786687851  | 3.754894495  | 3.934319735 | H  | 7.833869934  | 3.752683163  | 3.909866571 |
| H  | 5.801379681  | 5.998413086  | 7.871363163 | H  | 5.933494568  | 6.053617954  | 7.855593681 | H  | 6.121509552  | 6.135415077  | 7.825867176 |
| H  | 5.528392792  | 7.118651390  | 6.720337391 | H  | 5.699078560  | 7.199049473  | 6.719179630 | H  | 5.710181713  | 7.206131935  | 6.662159920 |
| H  | 4.621588707  | 5.751051426  | 6.752371311 | H  | 4.718770981  | 5.881954193  | 6.758713245 | H  | 4.821143150  | 5.837865829  | 6.860110760 |
| H  | 14.694447517 | 5.652044296  | 9.253850937 | H  | 15.065307617 | 6.138150692  | 1.158015370 | H  | 15.033919334 | 6.122939110  | 0.949446678 |
| N  | 15.039764404 | 4.342842102  | 7.214553356 | N  | 13.090501785 | 4.282232285  | 2.523748398 | N  | 12.847098351 | 4.094433784  | 1.437478304 |
| N  | 8.088483810  | 4.581725597  | 4.478813648 | N  | 8.137540817  | 4.547341824  | 4.481581688 | N  | 8.190233231  | 4.537186623  | 4.464936256 |
| N  | 5.574830532  | 6.105615616  | 6.869933605 | N  | 5.691126347  | 6.183743000  | 6.862196445 | N  | 5.777231693  | 6.202198029  | 6.857490063 |
| N  | 14.210970879 | 4.928646564  | 7.905856133 | N  | 13.937557220 | 4.936612129  | 2.049806833 | N  | 13.667315483 | 4.802893162  | 1.190759301 |



**Table S9.** Cartesian coordinates of RC, TS, IM, and PC for NH<sub>2</sub>NO decomposition with the assistance of Brønsted acid sites.

| Structure A |              |              |             | ts1 |              |              | Structure B |    |              |              |             |
|-------------|--------------|--------------|-------------|-----|--------------|--------------|-------------|----|--------------|--------------|-------------|
| Si          | 0.160183311  | 2.459873438  | 8.102834702 | Si  | 0.152831256  | 2.529242039  | 8.082130432 | Si | 0.170706570  | 2.516541481  | 8.059185982 |
| Si          | 7.958600044  | 0.656858087  | 2.995927095 | Si  | 7.925916672  | 0.718780220  | 2.980329752 | Si | 7.942526817  | 0.713177562  | 2.974157810 |
| Si          | 2.437233686  | 8.180811882  | 0.834352136 | Si  | 2.390634537  | 8.346739769  | 0.889121056 | Si | 2.423170567  | 8.311454773  | 0.853213847 |
| Si          | 5.557077408  | 8.298173904  | 1.057399750 | Si  | 5.523611069  | 8.365924835  | 1.038394809 | Si | 5.550347328  | 8.363961220  | 1.027109981 |
| Si          | 7.942067146  | 0.622989178  | 6.144258499 | Si  | 7.936041832  | 0.700304866  | 6.129358292 | Si | 7.954247475  | 0.701770306  | 6.122926235 |
| Si          | 0.111371100  | 5.631557465  | 8.245349884 | Si  | 0.111141145  | 5.724718571  | 8.249239922 | Si | 0.126526952  | 5.706346035  | 8.217498779 |
| Si          | 0.182209790  | 7.942637444  | 6.121929646 | Si  | 0.164221644  | 8.035890579  | 6.130816460 | Si | 0.189184457  | 8.020388603  | 6.112422943 |
| Si          | 5.617974281  | 0.429268718  | 8.274503708 | Si  | 5.617934227  | 0.489958346  | 8.256987572 | Si | 5.636477947  | 0.489980042  | 8.248501778 |
| Si          | 2.489506721  | 0.363001108  | 8.094238281 | Si  | 2.502044678  | 0.454986155  | 8.052180290 | Si | 2.518544197  | 0.439209223  | 8.039777756 |
| Si          | 0.174843445  | 8.040697098  | 3.031516790 | Si  | 0.179593012  | 8.018647194  | 3.007619619 | Si | 0.216610879  | 8.015606880  | 2.988704205 |
| Si          | 8.015264511  | 2.955967903  | 0.861509323 | Si  | 8.009037018  | 3.020003319  | 0.850732148 | Si | 8.027328491  | 3.018377781  | 0.847831249 |
| Si          | 9.591788292  | 2.452687263  | 8.086732864 | Si  | 9.583762169  | 2.530046225  | 8.067675591 | Si | 9.602391243  | 2.532946587  | 8.063075066 |
| Si          | 17.415323257 | 0.688131630  | 3.026631594 | Si  | 17.322301865 | 0.770170391  | 3.017211676 | Si | 17.372596741 | 0.750061393  | 2.990566015 |
| Si          | 11.851039886 | 8.182811737  | 0.845091999 | Si  | 11.829589844 | 8.250696182  | 0.838794291 | Si | 11.853863716 | 8.259818077  | 0.839123547 |
| Si          | 14.971879005 | 8.367745399  | 1.077989101 | Si  | 14.940285683 | 8.419998169  | 1.117092490 | Si | 14.970600128 | 8.386533737  | 1.070024610 |
| Si          | 17.351556778 | 0.636901736  | 6.137812138 | Si  | 17.334308624 | 0.732314408  | 6.157375336 | Si | 17.355506897 | 0.708647013  | 6.133346081 |
| Si          | 9.543966293  | 5.618071556  | 8.278383255 | Si  | 9.506243706  | 5.695071220  | 8.264662743 | Si | 9.517935753  | 5.697594643  | 8.260555267 |
| Si          | 9.605732918  | 7.922245979  | 6.141662121 | Si  | 9.604790688  | 8.000375748  | 6.138319016 | Si | 9.617040634  | 7.998691082  | 6.134507179 |
| Si          | 15.041143417 | 0.513297319  | 8.259846687 | Si  | 15.039841652 | 0.470408082  | 8.301383972 | Si | 15.054573059 | 0.480532646  | 8.266901970 |
| Si          | 11.910799980 | 0.347422004  | 8.082747459 | Si  | 11.909809113 | 0.419189095  | 8.090253830 | Si | 11.929062843 | 0.423908055  | 8.086389542 |
| Si          | 9.604084969  | 7.923064232  | 3.021165609 | Si  | 9.576679230  | 7.976875305  | 3.012215376 | Si | 9.601968765  | 7.978724003  | 3.010390759 |
| Si          | 17.392757416 | 3.003703594  | 0.840447366 | Si  | 17.461214066 | 2.997460604  | 0.886465609 | Si | 17.479934692 | 2.993346453  | 0.863775671 |
| Al          | 7.911925316  | 6.139078617  | 1.081330419 | Al  | 7.879733562  | 6.203012943  | 1.082101941 | Al | 7.911091805  | 6.195873260  | 1.081671953 |
| Al          | 17.370822906 | 6.164399147  | 1.082214594 | Al  | 17.266986847 | 6.181432247  | 1.224665880 | Al | 17.317718506 | 6.180175781  | 1.160421848 |
| O           | 1.615281463  | 1.731515408  | 8.195265770 | O   | 1.624311686  | 1.830570221  | 8.082026482 | O  | 1.642183542  | 1.812767982  | 8.073183060 |
| O           | 0.076118395  | 0.082025081  | 2.983098269 | O   | -0.196559995 | -0.153923661 | 2.884144068 | O  | -0.110288978 | -0.115880735 | 2.854564190 |
| O           | 8.129929543  | 2.093839169  | 2.253792524 | O   | 8.131532669  | 2.159136057  | 2.245702982 | O  | 8.150661469  | 2.149475336  | 2.235371828 |
| O           | 2.944242001  | 0.223386854  | 0.075277634 | O   | 2.940604687  | 0.348480225  | 0.055435099 | O  | 2.965362787  | 0.324955612  | 0.038837504 |
| O           | 1.546536446  | 8.201780319  | 2.181642056 | O   | 1.557429671  | 8.491935730  | 2.265718222 | O  | 1.605896354  | 8.430149078  | 2.239266634 |
| O           | 0.012926400  | 2.877164841  | 0.097045608 | O   | 0.054861877  | 2.892637491  | 0.081292719 | O  | 0.074089028  | 2.882450581  | 0.061986387 |
| O           | 6.389746666  | 6.950065136  | 0.971225858 | O   | 6.351252079  | 7.012831211  | 0.970757425 | O  | 6.399525166  | 7.025336266  | 0.962795377 |
| O           | 8.135327339  | 8.645092964  | 6.286737442 | O   | 8.148321152  | 8.743767738  | 6.285681248 | O  | 8.161844254  | 8.741309166  | 6.273969173 |
| O           | 6.513010025  | 0.383962214  | 6.899889469 | O   | 6.512830734  | 0.457898617  | 6.890021801 | O  | 6.531635284  | 0.467095435  | 6.880685806 |
| O           | 8.101469040  | 5.779178143  | 8.968291283 | O   | 8.059341431  | 5.821664810  | 8.956583977 | O  | 8.066909790  | 5.799500942  | 8.939388275 |
| O           | 0.094965041  | 6.484816074  | 6.845701218 | O   | 0.076435328  | 6.570071697  | 6.872695923 | O  | 0.109019995  | 6.552160740  | 6.838047981 |
| O           | 5.042672157  | 8.373373032  | 8.998358727 | O   | 5.008143902  | 8.426735878  | 8.971812248 | O  | 5.034313679  | 8.429029465  | 8.963482857 |
| O           | 1.300371289  | 6.208006859  | 9.211437225 | O   | 1.110353470  | 6.351747513  | 9.347153664 | O  | 1.157383919  | 6.327579975  | 9.297929764 |
| O           | -0.669529676 | 1.871363401  | 6.814227581 | O   | 18.130104065 | 2.020589113  | 6.789862156 | O  | 18.147150040 | 1.992617011  | 6.771275043 |
| O           | 6.724857330  | -0.150779352 | 2.316544056 | O   | 6.680765629  | -0.068101972 | 2.290723801 | O  | 6.694536209  | -0.069318727 | 2.286030531 |

|    |              |              |             |    |              |              |             |    |              |              |             |
|----|--------------|--------------|-------------|----|--------------|--------------|-------------|----|--------------|--------------|-------------|
| O  | 6.165316582  | 1.591126680  | 9.258309364 | O  | 6.160854340  | 1.636053085  | 9.259911537 | O  | 6.183466434  | 1.640442371  | 9.247837067 |
| O  | 18.065008163 | 6.885778904  | 2.467624664 | O  | -0.367778122 | 6.673655510  | 2.337722063 | O  | -0.389092416 | 6.687825680  | 2.340203524 |
| O  | 2.005053759  | -0.506918073 | 6.803250790 | O  | 2.049700260  | -0.472630024 | 6.789123058 | O  | 2.069776773  | -0.479733407 | 6.770761013 |
| O  | 0.592061281  | 7.718061447  | 4.576841831 | O  | 0.526841760  | 7.775649071  | 4.585071564 | O  | 0.558497667  | 7.780611992  | 4.565650463 |
| O  | 4.062708378  | 0.737552524  | 7.887363911 | O  | 4.071344376  | 0.846398711  | 7.867222309 | O  | 4.088681221  | 0.837574899  | 7.863572121 |
| O  | 7.649961948  | 4.444038868  | 1.257529616 | O  | 7.610692501  | 4.505495548  | 1.229176044 | O  | 7.633139133  | 4.499897480  | 1.248567462 |
| O  | 7.640289783  | 0.951270401  | 4.577136993 | O  | 7.608339787  | 1.009842396  | 4.562434673 | O  | 7.639029503  | 1.017093897  | 4.555965900 |
| O  | 3.976541519  | 7.973978519  | 1.272240758 | O  | 3.934118509  | 8.040840149  | 1.239839673 | O  | 3.968547583  | 8.015020370  | 1.211448193 |
| O  | 0.403408527  | 4.059659004  | 7.895993233 | O  | 0.382669687  | 4.155201912  | 7.977745533 | O  | 0.406407595  | 4.136812687  | 7.930706024 |
| O  | 11.039404869 | 1.713931203  | 8.176548958 | O  | 11.038040161 | 1.796603680  | 8.138045311 | O  | 11.062552452 | 1.808134913  | 8.130410194 |
| O  | 9.365972519  | -0.137152404 | 2.878583670 | O  | 9.313011169  | -0.102374800 | 2.857993364 | O  | 9.330018044  | -0.107632868 | 2.854456902 |
| O  | 17.374872208 | 2.043215513  | 2.156571627 | O  | 17.625719070 | 2.185626268  | 2.286898613 | O  | 17.621025085 | 2.174612761  | 2.263912678 |
| O  | 12.372527122 | 0.218797714  | 0.076039262 | O  | 12.338192940 | 0.293422878  | 0.074908838 | O  | 12.375961304 | 0.309457600  | 0.082365304 |
| O  | 10.984843254 | 8.215826988  | 2.207276344 | O  | 10.942225456 | 8.280352592  | 2.188450098 | O  | 10.970695496 | 8.291804314  | 2.193386316 |
| O  | 9.452117920  | 2.843678951  | 0.071682528 | O  | 9.447685242  | 2.918214798  | 0.058528159 | O  | 9.468711853  | 2.928158522  | 0.055006392 |
| O  | 15.722858429 | 6.905910015  | 0.744748652 | O  | 15.848555565 | 7.120409966  | 1.176574230 | O  | 15.852082253 | 7.063097954  | 1.038543940 |
| O  | 17.536109924 | 8.642738342  | 6.236169338 | O  | 17.572763443 | 8.788318634  | 6.336035252 | O  | 17.592164993 | 8.765688896  | 6.317298412 |
| O  | 15.932994843 | 0.379665613  | 6.902739048 | O  | 15.926754951 | 0.479952931  | 6.936434269 | O  | 15.936981201 | 0.445792437  | 6.896914005 |
| O  | 17.490116119 | 5.802765846  | 8.929548264 | O  | 17.365081787 | 5.864014149  | 8.881206512 | O  | 17.411680222 | 5.852954865  | 8.855212212 |
| O  | 9.552709579  | 6.466539383  | 6.869081497 | O  | 9.512966156  | 6.539171696  | 6.852797985 | O  | 9.532026291  | 6.536381721  | 6.847465038 |
| O  | 14.523860931 | 8.518379211  | 9.109425545 | O  | 14.458896637 | 8.375736237  | 8.980686188 | O  | 14.464992523 | 8.379727364  | 8.946659088 |
| O  | 10.746548653 | 6.193825722  | 9.241403580 | O  | 10.700839996 | 6.282007217  | 9.217013359 | O  | 10.697104454 | 6.293128490  | 9.226899147 |
| O  | 8.757870674  | 1.892138243  | 6.781162739 | O  | 8.739679337  | 1.985238314  | 6.759288788 | O  | 8.757102966  | 1.986570954  | 6.757209301 |
| O  | 15.635057449 | 9.012673378  | 2.404854059 | O  | 16.026222229 | 0.088052735  | 2.298291206 | O  | 16.115585327 | 0.004799500  | 2.266485929 |
| O  | 15.547681808 | 1.761307240  | 9.153789520 | O  | 15.599130630 | 1.585950375  | 9.325709343 | O  | 15.622424126 | 1.576990128  | 9.299669266 |
| O  | 8.845544815  | 6.614457607  | 2.490176916 | O  | 8.822992325  | 6.657905102  | 2.489894867 | O  | 8.855936050  | 6.656811714  | 2.486294746 |
| O  | 11.446196556 | -0.528995097 | 6.793340683 | O  | 11.460979462 | -0.469827950 | 6.799190044 | O  | 11.461856842 | -0.468272001 | 6.806375027 |
| O  | 9.990576744  | 7.693392754  | 4.590002537 | O  | 9.970967293  | 7.767920017  | 4.581995010 | O  | 9.995138168  | 7.764296055  | 4.581007957 |
| O  | 13.479640961 | 0.725840151  | 7.879725456 | O  | 13.487632751 | 0.818169653  | 7.935537338 | O  | 13.500107765 | 0.820943534  | 7.908930302 |
| O  | 17.074718475 | 4.495594501  | 1.280555725 | O  | 17.046178818 | 4.502439976  | 1.160495877 | O  | 17.077230453 | 4.498150349  | 1.147186995 |
| O  | 17.009822845 | 0.978680730  | 4.581532955 | O  | 17.008358002 | 1.026174545  | 4.597716331 | O  | 17.031415939 | 0.984775245  | 4.569762707 |
| O  | 13.413461685 | 8.016431808  | 1.288697600 | O  | 13.371683121 | 8.045029640  | 1.273541331 | O  | 13.396807671 | 8.039238930  | 1.270365119 |
| O  | 9.842775345  | 4.050228119  | 7.882953167 | O  | 9.833292007  | 4.130016804  | 7.875001431 | O  | 9.870418549  | 4.133402824  | 7.867260933 |
| O  | 13.967533112 | 5.369893551  | 8.001434326 | O  | 14.813053131 | 6.630053520  | 6.588755131 | O  | 15.407213211 | 6.306245327  | 7.306835651 |
| Cu | 7.103865147  | 5.177635193  | 5.595642567 | Cu | 7.124876976  | 4.960496902  | 5.625604630 | Cu | 7.089223385  | 4.896021843  | 5.639706135 |
| H  | 15.897221565 | 6.653743267  | 5.982426643 | H  | 14.156823158 | 3.860179901  | 7.728405476 | H  | 12.868422508 | 4.570551395  | 7.550298691 |
| H  | 16.254821777 | 6.201496124  | 7.680752277 | H  | 16.670726776 | 5.975039482  | 8.197978020 | H  | 16.664846420 | 6.028316498  | 8.166253090 |
| H  | 8.676738739  | 5.162128448  | 3.738530397 | H  | 8.669833183  | 5.230818272  | 3.735329866 | H  | 8.650325775  | 5.242339134  | 3.757562399 |
| H  | 9.175695419  | 4.109137058  | 4.931268692 | H  | 9.297744751  | 4.205423832  | 4.885456085 | H  | 9.277386665  | 4.203422546  | 4.894243717 |
| H  | 8.035775185  | 3.645745754  | 3.834589481 | H  | 8.196023941  | 3.649809837  | 3.789757252 | H  | 8.191461563  | 3.657071590  | 3.778836489 |
| H  | 6.583521366  | 6.092728615  | 7.742734909 | H  | 6.547413826  | 5.826943398  | 7.771841526 | H  | 6.475105286  | 5.741663933  | 7.787374496 |
| H  | 5.688462734  | 6.940856934  | 6.647857189 | H  | 5.345957756  | 6.327809811  | 6.745625019 | H  | 5.230315685  | 6.143696785  | 6.769610882 |
| H  | 5.164037228  | 5.472119331  | 7.167458057 | H  | 5.323001862  | 4.799356461  | 7.352931499 | H  | 5.325593948  | 4.623212814  | 7.389177322 |
| H  | 14.609338760 | 5.737421036  | 9.186134338 | H  | 14.677618027 | 6.997031212  | 7.510556221 | H  | 14.888231277 | 7.056614399  | 7.732011795 |

|            |              |              |             |                    |              |             |             |                    |              |              |             |
|------------|--------------|--------------|-------------|--------------------|--------------|-------------|-------------|--------------------|--------------|--------------|-------------|
| N          | 15.590676308 | 6.264759541  | 6.871031761 | N                  | 14.389701843 | 4.865049362 | 7.789649010 | N                  | 13.413006783 | 5.451230049  | 7.577827454 |
| N          | 8.361199379  | 4.434011459  | 4.404187679 | N                  | 8.443061829  | 4.451881886 | 4.380259514 | N                  | 8.424150467  | 4.450773716  | 4.386880875 |
| N          | 5.998093605  | 5.997264862  | 6.894500256 | N                  | 5.938416481  | 5.530269623 | 6.986841679 | N                  | 5.882984161  | 5.394744873  | 7.012276649 |
| N          | 14.379214287 | 5.817793369  | 6.886761189 | N                  | 14.512404442 | 5.276017666 | 6.623797417 | N                  | 14.569083214 | 5.149558544  | 7.285079002 |
| <b>ts2</b> |              |              |             | <b>Structure C</b> |              |             |             | <b>Structure D</b> |              |              |             |
| Si         | 0.198152065  | 2.544766188  | 8.063773155 | Si                 | 0.206987262  | 2.563946962 | 8.064236641 | Si                 | 0.277174115  | 2.621788979  | 7.955389977 |
| Si         | 7.981889248  | 0.730561912  | 2.964904070 | Si                 | 8.020603180  | 0.734459579 | 2.958995581 | Si                 | 8.127430916  | 0.813555717  | 2.881073475 |
| Si         | 2.460330963  | 8.279524803  | 0.826373637 | Si                 | 2.507586002  | 8.268680573 | 0.803070843 | Si                 | 2.589646578  | 8.335442543  | 0.697221816 |
| Si         | 5.585120678  | 8.378352165  | 1.011365771 | Si                 | 5.632154942  | 8.378590584 | 0.996671140 | Si                 | 5.709174156  | 8.461961746  | 0.916021168 |
| Si         | 7.974022865  | 0.720225692  | 6.103300571 | Si                 | 7.986511230  | 0.724952161 | 6.095559597 | Si                 | 8.068949699  | 0.780252874  | 6.011088848 |
| Si         | 0.132626772  | 5.693756580  | 8.209666252 | Si                 | 0.162741899  | 5.712175369 | 8.205272675 | Si                 | 0.265741289  | 5.791659355  | 8.128959656 |
| Si         | 0.211816996  | 8.011909485  | 6.093989849 | Si                 | 0.231747001  | 8.029921532 | 6.095313549 | Si                 | 0.328359276  | 8.084248543  | 6.002123356 |
| Si         | 5.643553257  | 0.544975340  | 8.226464272 | Si                 | 5.659498215  | 0.584768653 | 8.220151901 | Si                 | 5.737448215  | 0.653481185  | 8.145628929 |
| Si         | 2.528601885  | 0.434188485  | 8.034015656 | Si                 | 2.541075706  | 0.446031809 | 8.053334236 | Si                 | 2.620009184  | 0.518920541  | 7.960531235 |
| Si         | 0.221528530  | 8.080747604  | 2.976316929 | Si                 | 0.248873278  | 8.141043663 | 2.993441343 | Si                 | 0.314985573  | 8.175361633  | 2.908334970 |
| Si         | 8.031527519  | 3.055151224  | 0.827583611 | Si                 | 8.035725594  | 3.084537029 | 0.816745341 | Si                 | 8.124950409  | 3.150070906  | 0.739597917 |
| Si         | 9.629334450  | 2.550506592  | 8.053750992 | Si                 | 9.636920929  | 2.561296940 | 8.044329643 | Si                 | 9.724646568  | 2.615150928  | 7.970620632 |
| Si         | 17.428703308 | 0.779791296  | 2.998237371 | Si                 | 17.497880936 | 0.786496639 | 2.995326281 | Si                 | 17.563993454 | 0.830649078  | 2.896117687 |
| Si         | 11.897054672 | 8.265922546  | 0.824647367 | Si                 | 11.920153618 | 8.269283295 | 0.812833190 | Si                 | 11.997967720 | 8.320791245  | 0.723235965 |
| Si         | 14.996592522 | 8.421982765  | 1.061541796 | Si                 | 15.010615349 | 8.483884811 | 1.050176501 | Si                 | 15.109002113 | 8.493603706  | 0.951693177 |
| Si         | 17.391819000 | 0.722160280  | 6.124728680 | Si                 | 17.409980774 | 0.741761088 | 6.111527920 | Si                 | 17.493232727 | 0.784944415  | 6.008142948 |
| Si         | 9.583531380  | 5.707601547  | 8.251289368 | Si                 | 9.642801285  | 5.707667828 | 8.238979340 | Si                 | 9.704817772  | 5.782746792  | 8.157345772 |
| Si         | 9.626136780  | 8.008649826  | 6.121425629 | Si                 | 9.642230988  | 8.005978584 | 6.116526127 | Si                 | 9.692986488  | 8.068239212  | 6.025008678 |
| Si         | 15.068855286 | 0.556181848  | 8.239917755 | Si                 | 15.079991341 | 0.609006822 | 8.216075897 | Si                 | 15.169500351 | 0.625086129  | 8.129958153 |
| Si         | 11.957409859 | 0.439229012  | 8.072654724 | Si                 | 11.958528519 | 0.434745669 | 8.075094223 | Si                 | 12.035569191 | 0.488919318  | 8.001450539 |
| Si         | 9.614832878  | 8.009832382  | 3.011116505 | Si                 | 9.628935814  | 8.040942192 | 3.009233713 | Si                 | 9.706260681  | 8.098409653  | 2.932572365 |
| Si         | 17.448534012 | 3.075883389  | 0.838246524 | Si                 | 17.437387466 | 3.101461887 | 0.822572887 | Si                 | 17.512926102 | 3.142270565  | 0.713017642 |
| Al         | 7.939420700  | 6.221716404  | 1.082437277 | Al                 | 7.967360497  | 6.245951176 | 1.068492293 | Al                 | 8.036385536  | 6.332859993  | 0.992290676 |
| Al         | 17.341861725 | 6.241801739  | 1.020661712 | Al                 | 17.442842484 | 6.235403538 | 1.046674728 | Al                 | 17.531299591 | 6.305142879  | 0.973022342 |
| O          | 1.644452810  | 1.793112993  | 8.128831863 | O                  | 1.641700745  | 1.796336889 | 8.157923698 | O                  | 1.731418252  | 1.879180431  | 8.044693947 |
| O          | 0.032419190  | 0.062144399  | 2.901096821 | O                  | 0.161650419  | 0.188983351 | 2.928203344 | O                  | 0.224281862  | 0.224114820  | 2.843884706 |
| O          | 8.134234428  | 2.151713371  | 2.189610481 | O                  | 8.094174385  | 2.143126726 | 2.152949810 | O                  | 8.203627586  | 2.224133253  | 2.082095146 |
| O          | 3.024389029  | 0.305846512  | 0.028852491 | O                  | 3.039571285  | 0.315528512 | 0.047508717 | O                  | 2.427641153  | -0.346548438 | 9.325774193 |
| O          | 1.630814314  | 8.380265236  | 2.207575321 | O                  | 1.638786197  | 8.298220634 | 2.165166140 | O                  | 1.679253340  | 8.314958572  | 2.030394554 |
| O          | 0.057017628  | 2.976313353  | 0.063399374 | O                  | 0.053260799  | 3.014327049 | 0.064078748 | O                  | -0.570690393 | 2.281581879  | 9.306988716 |
| O          | 6.430824280  | 7.037532330  | 0.855677009 | O                  | 6.443456650  | 7.026919842 | 0.747212112 | O                  | 6.495364666  | 7.090046406  | 0.677100122 |
| O          | 8.166070938  | 8.744517326  | 6.239154816 | O                  | 8.188160896  | 8.756896973 | 6.229977608 | O                  | 8.216634750  | 8.777137756  | 6.121576786 |
| O          | 6.551644325  | 0.514967859  | 6.862687111 | O                  | 6.560193062  | 0.513913512 | 6.855597496 | O                  | 6.651388168  | 0.617457926  | 6.789097309 |
| O          | 8.172031403  | 5.793672085  | 8.987295151 | O                  | 8.263331413  | 5.809751987 | 9.028668404 | O                  | 8.337409019  | 5.921410561  | 8.957350731 |
| O          | 0.168217659  | 6.556550980  | 6.824943066 | O                  | 0.155219018  | 6.573261261 | 6.815864086 | O                  | 0.260495394  | 6.626996517  | 6.718108177 |
| O          | 5.070632458  | 8.517048836  | 8.993576050 | O                  | 5.102545738  | 8.588596344 | 9.031861305 | O                  | 5.192255974  | 8.643621445  | 8.931097984 |
| O          | 1.226335883  | 6.308060169  | 9.257302284 | O                  | 1.332471967  | 6.310194969 | 9.186502457 | O                  | 1.510029554  | 6.371003628  | 9.046285629 |
| O          | -0.657840014 | 1.996582866  | 6.775482655 | O                  | -0.641401410 | 2.009303570 | 6.774807453 | O                  | -0.561688244 | 2.059975863  | 6.659774303 |
| O          | 6.765296459  | -0.123053737 | 2.309694529 | O                  | 6.170053959  | 9.183423996 | 2.326502800 | O                  | 6.969223976  | -0.116886973 | 2.225619316 |

|    |              |              |             |    |              |              |             |    |              |              |             |
|----|--------------|--------------|-------------|----|--------------|--------------|-------------|----|--------------|--------------|-------------|
| O  | 6.194505692  | 1.741864443  | 9.178161621 | O  | 6.187078953  | 1.828647494  | 9.131832123 | O  | 6.256065845  | 1.887424707  | 9.080600739 |
| O  | -0.565521121 | 6.860606194  | 2.320236444 | O  | -0.695264995 | 6.997481346  | 2.396595716 | O  | -0.648946226 | 7.012099266  | 2.385943413 |
| O  | 2.078881741  | -0.458419383 | 6.749409676 | O  | 2.088189840  | -0.449908257 | 6.773933411 | O  | 2.174724579  | -0.384862304 | 6.686929703 |
| O  | 0.571461916  | 7.767410755  | 4.540888786 | O  | 0.629277945  | 7.809546471  | 4.544193745 | O  | 0.749858081  | 7.887719154  | 4.453462601 |
| O  | 4.096185684  | 0.866659880  | 7.836305141 | O  | 4.102464676  | 0.881919384  | 7.834728718 | O  | 4.187743664  | 0.954303145  | 7.746555805 |
| O  | 7.652418613  | 4.528299332  | 1.269838572 | O  | 7.669871807  | 4.553580284  | 1.286098480 | O  | 7.773530960  | 4.633193493  | 1.169357061 |
| O  | 7.665175438  | 1.061398864  | 4.539659500 | O  | 7.677464008  | 1.067005396  | 4.529272079 | O  | 7.774378777  | 1.152090192  | 4.449788094 |
| O  | 4.014477730  | 8.014122963  | 1.208488464 | O  | 4.056741714  | 8.038015366  | 1.213000894 | O  | 4.133981705  | 8.158354759  | 1.160708785 |
| O  | 0.514678299  | 4.136515617  | 7.886485100 | O  | 0.525547981  | 4.150135517  | 7.861542702 | O  | 0.563615739  | 4.214033604  | 7.773339272 |
| O  | 11.104672432 | 1.840016007  | 8.135881424 | O  | 11.088819504 | 1.812517405  | 8.131901741 | O  | 11.228792191 | 1.930651188  | 8.092838287 |
| O  | 9.415184975  | -0.022549748 | 2.874572039 | O  | 9.489605904  | 0.050429478  | 2.880309343 | O  | 9.598818779  | 0.128686219  | 2.826095819 |
| O  | 17.517621994 | 2.177744389  | 2.193710089 | O  | 17.450218201 | 2.152516127  | 2.143907785 | O  | 17.536130905 | 2.196710348  | 2.039397717 |
| O  | 12.427440643 | 0.319929510  | 0.069759794 | O  | 12.464581490 | 0.341226339  | 0.094070360 | O  | 12.500491142 | 0.398320317  | 0.014895709 |
| O  | 10.969965935 | 8.250259399  | 2.146303415 | O  | 10.991454124 | 8.218334198  | 2.130703926 | O  | 11.053151131 | 8.239945412  | 2.027282000 |
| O  | 9.482969284  | 2.975650549  | 0.042011846 | O  | 9.487867355  | 2.999027252  | 0.039129350 | O  | 8.884020805  | 2.285380602  | 9.318045616 |
| O  | 15.800354004 | 7.062081814  | 0.763034463 | O  | 15.792350769 | 7.035030842  | 0.692980766 | O  | 15.872784615 | 7.048357964  | 0.636104107 |
| O  | 17.608251572 | 8.763822556  | 6.276056767 | O  | 17.624706268 | 8.781875610  | 6.241664410 | O  | -1.127416492 | 8.831627846  | 6.137289524 |
| O  | 15.965378761 | 0.476438522  | 6.885869503 | O  | 15.983283997 | 0.490489244  | 6.870559692 | O  | 16.075738907 | 0.525528610  | 6.784882545 |
| O  | 17.456888199 | 5.771722794  | 8.796620369 | O  | 17.535531998 | 5.797520161  | 8.873482704 | O  | -1.142319202 | 5.953440666  | 8.879157066 |
| O  | 9.550390244  | 6.542901039  | 6.833237648 | O  | 9.555691719  | 6.540382385  | 6.820651531 | O  | 9.644050598  | 6.598570347  | 6.726428032 |
| O  | 14.422038078 | 8.527623177  | 9.021472931 | O  | 14.484483719 | 8.604942322  | 9.056165695 | O  | 14.594184875 | 8.616393089  | 8.954030037 |
| O  | 10.809735298 | 6.307007790  | 9.164855003 | O  | 10.888610840 | 6.330706596  | 9.122040749 | O  | 10.970552444 | 6.388502598  | 9.018733978 |
| O  | 8.806971550  | 1.990845919  | 6.742437363 | O  | 8.802325249  | 1.998421192  | 6.740755558 | O  | 8.946763039  | 2.011582851  | 6.662444592 |
| O  | 16.246665955 | -0.144622743 | 2.342516899 | O  | 15.722284317 | 9.121493340  | 2.347381830 | O  | 15.781626701 | 9.174889565  | 2.249779701 |
| O  | 15.596803665 | 1.736913443  | 9.203800201 | O  | 15.595270157 | 1.817967296  | 9.153392792 | O  | 15.645940781 | 1.851318359  | 9.066160202 |
| O  | 8.790450096  | 6.718514919  | 2.531288862 | O  | 8.725851059  | 6.797902584  | 2.548117876 | O  | 8.773675919  | 6.871232986  | 2.488553286 |
| O  | 11.455842018 | -0.447910547 | 6.805872917 | O  | 11.477535248 | -0.472977519 | 6.822156906 | O  | 11.471529007 | -0.361713290 | 6.748876572 |
| O  | 10.041555405 | 7.788012981  | 4.574130535 | O  | 10.065354347 | 7.807471752  | 4.567863941 | O  | 10.160307884 | 7.875486374  | 4.488481998 |
| O  | 13.507941246 | 0.883166611  | 7.842622757 | O  | 13.513587952 | 0.879975319  | 7.829192162 | O  | 13.595071793 | 0.855892003  | 7.738145828 |
| O  | 17.045267105 | 4.563046455  | 1.205115914 | O  | 17.069299698 | 4.582175732  | 1.271963835 | O  | 17.167085648 | 4.635916710  | 1.127590060 |
| O  | 17.057458878 | 1.043211460  | 4.567274570 | O  | 17.083980560 | 1.064762354  | 4.547545910 | O  | 17.135972977 | 1.104809761  | 4.448553562 |
| O  | 13.425627708 | 8.076015472  | 1.312159181 | O  | 13.465635300 | 8.116388321  | 1.325129509 | O  | 13.542687416 | 8.165054321  | 1.214992523 |
| O  | 9.952599525  | 4.143547058  | 7.849739075 | O  | 9.952943802  | 4.143954754  | 7.815067291 | O  | 9.996965408  | 4.205597401  | 7.746135235 |
| O  | 15.342250824 | 6.078748226  | 7.451148510 | O  | 15.025916100 | 5.566695213  | 7.602026939 | O  | 13.073612213 | 3.974918365  | 8.582180023 |
| Cu | 6.923854351  | 4.798650742  | 5.821442127 | Cu | 6.754578114  | 4.740663052  | 6.030673504 | Cu | 6.662055016  | 4.756911755  | 6.107245922 |
| H  | 12.739331245 | 3.844075203  | 7.615467072 | H  | 13.002231598 | 3.243169069  | 7.461779594 | H  | 15.191547394 | 5.387197018  | 6.938361168 |
| H  | 16.319009781 | 5.865119457  | 7.788935661 | H  | 16.009380341 | 5.480869770  | 7.526939869 | H  | 12.466523170 | 3.244235039  | 8.282522202 |
| H  | 8.409904480  | 5.349794388  | 3.877413034 | H  | 8.162272453  | 5.458378315  | 4.036388397 | H  | 8.003465652  | 5.524698257  | 4.076505661 |
| H  | 9.125578880  | 4.320281982  | 4.954820156 | H  | 8.961823463  | 4.468761444  | 5.079090118 | H  | 8.885999680  | 4.639580727  | 5.134725571 |
| H  | 8.036359787  | 3.747553110  | 3.860918045 | H  | 7.881157398  | 3.842918873  | 4.006576538 | H  | 7.846677780  | 3.892194510  | 4.101709366 |
| H  | 6.060423851  | 5.653736115  | 7.948472500 | H  | 5.612602711  | 5.475767136  | 8.137686729 | H  | 5.495502472  | 5.418462276  | 8.226880074 |
| H  | 4.792288303  | 5.514559746  | 6.908653736 | H  | 4.502216816  | 4.854831219  | 7.088506699 | H  | 4.415659428  | 4.722596645  | 7.189613342 |
| H  | 5.380139351  | 4.187588692  | 7.672442913 | H  | 5.475438118  | 3.855210304  | 7.950922012 | H  | 5.466886044  | 3.790869713  | 8.037618637 |
| H  | 14.978052139 | 6.387830734  | 8.342035294 | H  | 14.888567924 | 5.997650146  | 9.092006683 | H  | 14.856721878 | 5.833009720  | 9.067449570 |

|                    |              |              |             |            |              |              |             |                    |              |              |             |
|--------------------|--------------|--------------|-------------|------------|--------------|--------------|-------------|--------------------|--------------|--------------|-------------|
| N                  | 13.394959450 | 4.655258656  | 7.631378651 | N          | 13.336083412 | 4.206154823  | 7.651016712 | N                  | 14.624504089 | 5.188515663  | 7.771426201 |
| N                  | 8.239776611  | 4.532526016  | 4.489461899 | N          | 8.048655510  | 4.629957676  | 4.643511295 | N                  | 7.956277370  | 4.711905003  | 4.709321499 |
| N                  | 5.656794071  | 5.060095310  | 7.211503506 | N          | 5.461233616  | 4.740139961  | 7.428294182 | N                  | 5.384932995  | 4.673982620  | 7.516667843 |
| N                  | 14.507811546 | 4.472316742  | 7.326241970 | N          | 14.515735626 | 4.225820541  | 7.331204891 | N                  | 13.822146416 | 4.270140171  | 7.499811172 |
| <b>Structure E</b> |              |              |             | <b>ts3</b> |              |              |             | <b>Structure F</b> |              |              |             |
| Si                 | 0.172541738  | 2.571025848  | 8.099317551 | Si         | 0.138341367  | 2.565256119  | 8.180542946 | Si                 | 0.262173235  | 2.582887888  | 8.012261391 |
| Si                 | 7.926970482  | 0.786540270  | 2.994313478 | Si         | 7.922501087  | 0.739109516  | 3.011922359 | Si                 | 8.085783958  | 0.756032169  | 2.913924932 |
| Si                 | 2.413125277  | 8.366179466  | 0.878796518 | Si         | 2.384423494  | 8.382792473  | 0.964749753 | Si                 | 2.553509951  | 8.292328835  | 0.735153794 |
| Si                 | 5.543644428  | 8.426668167  | 1.049297094 | Si         | 5.510991096  | 8.383059502  | 1.067969680 | Si                 | 5.686986446  | 8.402722359  | 0.944441974 |
| Si                 | 7.964329243  | 0.784331918  | 6.144320011 | Si         | 7.914378643  | 0.707924247  | 6.169897556 | Si                 | 8.043608665  | 0.748435855  | 6.042726517 |
| Si                 | 0.107007504  | 5.748501778  | 8.242328644 | Si         | 0.077879429  | 5.762641907  | 8.328749657 | Si                 | 0.233085334  | 5.749583244  | 8.157538414 |
| Si                 | 0.186166346  | 8.063088417  | 6.131817818 | Si         | 0.157569319  | 8.065587044  | 6.203590870 | Si                 | 0.287129462  | 8.051746368  | 6.024105549 |
| Si                 | 5.635250568  | 0.573423147  | 8.268280029 | Si         | 5.598029137  | 0.520814896  | 8.294345856 | Si                 | 5.713432312  | 0.593590200  | 8.173827171 |
| Si                 | 2.517735004  | 0.491564870  | 8.066352844 | Si         | 2.493623495  | 0.500029206  | 8.128432274 | Si                 | 2.580855608  | 0.476472080  | 7.984027863 |
| Si                 | 0.207890064  | 8.078804016  | 3.013657570 | Si         | 0.187273324  | 8.113335609  | 3.096437693 | Si                 | 0.292639315  | 8.162723541  | 2.935586691 |
| Si                 | 8.028824806  | 3.093052626  | 0.857196748 | Si         | 8.004442215  | 3.048166275  | 0.897837698 | Si                 | 8.068015099  | 3.103096008  | 0.770738780 |
| Si                 | 9.609560013  | 2.609491110  | 8.086401939 | Si         | 9.576763153  | 2.543688059  | 8.109848976 | Si                 | 9.690179825  | 2.563809872  | 8.001165390 |
| Si                 | 17.367956161 | 0.821023464  | 3.028681993 | Si         | 17.300029755 | 0.809429407  | 3.130282402 | Si                 | 17.541763306 | 0.815933049  | 2.950696945 |
| Si                 | 11.868312836 | 8.322420120  | 0.861914456 | Si         | 11.816610336 | 8.262627602  | 0.871974707 | Si                 | 11.947730064 | 8.257954597  | 0.769655466 |
| Si                 | 14.945223808 | 8.452613831  | 1.103379488 | Si         | 14.948542595 | 8.458325386  | 1.211815357 | Si                 | 15.054125786 | 8.492850304  | 1.033896208 |
| Si                 | 17.352664948 | 0.752067983  | 6.166584015 | Si         | 17.332029343 | 0.764774919  | 6.250147820 | Si                 | 17.457801819 | 0.741522372  | 6.058928013 |
| Si                 | 9.545181274  | 5.780014992  | 8.277112961 | Si         | 9.529320717  | 5.700850487  | 8.302250862 | Si                 | 9.685848236  | 5.713576317  | 8.208402634 |
| Si                 | 9.633063316  | 8.082188606  | 6.154328346 | Si         | 9.582894325  | 8.018106461  | 6.174703121 | Si                 | 9.685657501  | 8.018352509  | 6.074880600 |
| Si                 | 15.053037643 | 0.517839074  | 8.308101654 | Si         | 15.038000107 | 0.532299042  | 8.396897316 | Si                 | 15.140157700 | 0.588838339  | 8.183403015 |
| Si                 | 11.947086334 | 0.503117025  | 8.109277725 | Si         | 11.882766724 | 0.415758967  | 8.132209778 | Si                 | 11.998794556 | 0.432085693  | 8.039729118 |
| Si                 | 9.579311371  | 8.058999062  | 3.031657934 | Si         | 9.555419922  | 7.997898579  | 3.045641899 | Si                 | 9.657997131  | 8.038360596  | 2.979705572 |
| Si                 | 17.469995499 | 3.060573339  | 0.910374820 | Si         | 17.414011002 | 3.058629274  | 0.947696507 | Si                 | 17.490247726 | 3.116242647  | 0.750471950 |
| Al                 | 7.923274517  | 6.282850266  | 1.101977348 | Al         | 7.875666142  | 6.219026089  | 1.113835931 | Al                 | 7.993385792  | 6.264278889  | 1.036343098 |
| Al                 | 17.297842026 | 6.244069099  | 1.168539524 | Al         | 17.252120972 | 6.255793571  | 1.285546184 | Al                 | 17.506942749 | 6.269855499  | 0.984091401 |
| O                  | 1.641851187  | 1.863033056  | 8.128362656 | O          | 1.612266064  | 1.869478345  | 8.198852539 | O                  | 1.723363638  | 1.857171059  | 8.103461266 |
| O                  | -0.110296041 | -0.041461900 | 2.906490803 | O          | -0.152546674 | -0.022022635 | 3.044506073 | O                  | 0.204710409  | 0.214140594  | 2.888907671 |
| O                  | 8.113994598  | 2.220289469  | 2.244254112 | O          | 8.117333412  | 2.186578512  | 2.292976856 | O                  | 8.152657509  | 2.162628889  | 2.104649067 |
| O                  | 2.981389046  | 0.386700302  | 0.072445929 | O          | 2.975780010  | 0.387291849  | 0.130699426 | O                  | 2.347600698  | -0.420004934 | 9.323136330 |
| O                  | 1.600483298  | 8.493765831  | 2.268620968 | O          | 1.574490070  | 8.559225082  | 2.352868080 | O                  | 1.670948267  | 8.305059433  | 2.088136196 |
| O                  | 0.065171249  | 2.978663206  | 0.106837891 | O          | 0.022766337  | 2.917536974  | 0.166737378 | O                  | 0.115128167  | 3.014205694  | 0.013586532 |
| O                  | 6.396160603  | 7.089159489  | 0.961161435 | O          | 6.362821579  | 7.048124790  | 0.960209787 | O                  | 6.461187840  | 7.028200150  | 0.692097902 |
| O                  | 8.180240631  | 8.828406334  | 6.301564693 | O          | 8.112055779  | 8.737347603  | 6.330884457 | O                  | 8.227532387  | 8.768355370  | 6.172447681 |
| O                  | 6.546061516  | 0.551547408  | 6.909440994 | O          | 6.483822823  | 0.469908178  | 6.919692039 | O                  | 6.627102852  | 0.560963154  | 6.822104454 |
| O                  | 8.117367744  | 5.928136826  | 8.993850708 | O          | 8.096016884  | 5.830784798  | 9.013619423 | O                  | 8.325551987  | 5.838916779  | 9.024304390 |
| O                  | 0.120031416  | 6.602744102  | 6.865500927 | O          | 0.091371834  | 6.601416588  | 6.946084499 | O                  | 0.261946529  | 6.605569839  | 6.765341759 |
| O                  | 5.034891129  | 8.522772789  | 9.004169464 | O          | 4.963456154  | 8.453818321  | 9.004529953 | O                  | 5.184351921  | 8.592618942  | 8.970997810 |
| O                  | 1.121048689  | 6.390186787  | 9.330508232 | O          | 1.740000844  | 7.143352032  | 0.079219215 | O                  | 1.436232567  | 6.303503990  | 9.129075050 |
| O                  | -0.689898252 | 2.023207664  | 6.818211555 | O          | 18.139186859 | 2.053533554  | 6.870136738 | O                  | -0.578326762 | 1.987349510  | 6.734212399 |
| O                  | 6.686204433  | -0.028355926 | 2.326306581 | O          | 6.682443619  | -0.059179746 | 2.321966171 | O                  | 6.240896225  | 9.204402924  | 2.269108057 |

|    |              |              |             |    |              |              |             |    |              |              |             |
|----|--------------|--------------|-------------|----|--------------|--------------|-------------|----|--------------|--------------|-------------|
| O  | 6.172533512  | 1.746612072  | 9.249217033 | O  | 6.176925659  | 1.648739100  | 9.292869568 | O  | 6.201934814  | 1.843610406  | 9.101570129 |
| O  | -0.416481376 | 6.767138481  | 2.350340366 | O  | -0.410045922 | 6.812956333  | 2.391423464 | O  | -0.663759351 | 7.019105911  | 2.359043837 |
| O  | 2.051385164  | -0.426610500 | 6.803095818 | O  | 2.016475677  | -0.420807183 | 6.871433735 | O  | 2.103883266  | -0.367438138 | 6.680536747 |
| O  | 0.563209057  | 7.820106030  | 4.585615635 | O  | 0.539700150  | 7.808619022  | 4.662499428 | O  | 0.699197769  | 7.829227448  | 4.477678776 |
| O  | 4.086380005  | 0.891284168  | 7.863956451 | O  | 4.056444168  | 0.894308269  | 7.905417442 | O  | 4.154842854  | 0.861205757  | 7.775478363 |
| O  | 7.667146683  | 4.582715988  | 1.247370601 | O  | 7.588618279  | 4.526313782  | 1.283698797 | O  | 7.687510967  | 4.571575165  | 1.232869387 |
| O  | 7.638513565  | 1.099482298  | 4.577826977 | O  | 7.606917858  | 1.018225789  | 4.597877502 | O  | 7.719113350  | 1.093890905  | 4.479432106 |
| O  | 3.963181496  | 8.063783646  | 1.219987869 | O  | 3.928095102  | 8.034172058  | 1.287090421 | O  | 4.102007866  | 8.121743202  | 1.167904258 |
| O  | 0.425933897  | 4.184519291  | 7.939521790 | O  | 0.356043100  | 4.190898895  | 8.061432838 | O  | 0.533378005  | 4.176718712  | 7.808482170 |
| O  | 11.066490173 | 1.872835636  | 8.160521507 | O  | 11.025728226 | 1.801909208  | 8.181121826 | O  | 11.127624512 | 1.802381277  | 8.126818657 |
| O  | 9.325076103  | -0.015122503 | 2.874382257 | O  | 9.322306633  | -0.060274288 | 2.875820875 | O  | 9.562142372  | 0.076235637  | 2.860806227 |
| O  | 17.623167038 | 2.255942345  | 2.319942236 | O  | 17.509878159 | 2.198398113  | 2.325335741 | O  | 17.486291885 | 2.177368164  | 2.084403276 |
| O  | 12.452037811 | 0.383478284  | 0.105318941 | O  | 12.244297028 | 0.286741555  | 0.101545699 | O  | 12.463535309 | 0.317241997  | 0.045986436 |
| O  | 10.921993256 | 8.349451065  | 2.169183969 | O  | 10.930256844 | 8.253972054  | 2.223181486 | O  | 11.012741089 | 8.169951439  | 2.079496622 |
| O  | 9.475449562  | 2.986815929  | 0.074545868 | O  | 9.451796532  | 2.979079485  | 0.117835514 | O  | 8.818666458  | 2.272037506  | 9.345139503 |
| O  | 15.831811905 | 7.133131981  | 1.053776860 | O  | 15.777694702 | 7.102295876  | 1.232885718 | O  | 15.783989906 | 6.982421398  | 0.766570270 |
| O  | 17.578855515 | 8.796604156  | 6.312510490 | O  | 17.551698685 | 8.805748940  | 6.371949673 | O  | 17.652807236 | 8.763727188  | 6.156607628 |
| O  | 15.937860489 | 0.492027998  | 6.941958904 | O  | 15.927508354 | 0.519768894  | 7.026286602 | O  | 16.041547775 | 0.452259541  | 6.831931591 |
| O  | 17.385906219 | 5.841293335  | 8.850481987 | O  | 17.327692032 | 5.906620979  | 8.930621147 | O  | 17.625242233 | 5.918793201  | 8.854914665 |
| O  | 9.543564796  | 6.615817547  | 6.857397079 | O  | 9.521800041  | 6.557206631  | 6.895432949 | O  | 9.602449417  | 6.560773373  | 6.799405575 |
| O  | 14.319461823 | 8.433148384  | 8.977222443 | O  | 14.565072060 | 8.520112038  | 9.176849365 | O  | 14.610878944 | 8.608248711  | 9.055979729 |
| O  | 10.757162094 | 6.375017166  | 9.206089973 | O  | 10.744422913 | 6.271299362  | 9.245371819 | O  | 10.962305069 | 6.301841736  | 9.079893112 |
| O  | 8.781852722  | 2.063514948  | 6.770709515 | O  | 8.710193634  | 1.984369516  | 6.820734978 | O  | 8.869615555  | 2.013935089  | 6.683605671 |
| O  | 16.117910385 | 0.078454360  | 2.290329218 | O  | 16.034248352 | 0.001820013  | 2.503532648 | O  | 15.768912315 | 9.131720543  | 2.326536655 |
| O  | 15.638772964 | 1.586998940  | 9.357843399 | O  | 15.536099434 | 1.754603148  | 9.338899612 | O  | 15.649874687 | 1.833790660  | 9.078246117 |
| O  | 8.808294296  | 6.734378338  | 2.549854040 | O  | 8.778800964  | 6.687310219  | 2.540890217 | O  | 8.711094856  | 6.821919918  | 2.534414530 |
| O  | 11.496882439 | -0.406218946 | 6.835261345 | O  | 11.435203552 | -0.439604133 | 6.816825867 | O  | 11.518382072 | -0.453165442 | 6.768445015 |
| O  | 10.012187004 | 7.877846718  | 4.596704006 | O  | 9.942749977  | 7.791434288  | 4.617094517 | O  | 10.118607521 | 7.797104359  | 4.529821873 |
| O  | 13.512598991 | 0.991320312  | 7.903982639 | O  | 13.468461037 | 0.749452233  | 8.017435074 | O  | 13.569361687 | 0.808660746  | 7.820879459 |
| O  | 17.028013229 | 4.558478355  | 1.184555650 | O  | 17.082069397 | 4.568600178  | 1.287487388 | O  | 17.124603271 | 4.613459110  | 1.150181413 |
| O  | 17.011116028 | 1.051392913  | 4.607500553 | O  | 16.977067947 | 1.130908966  | 4.705440998 | O  | 17.118930817 | 1.091950655  | 4.502421856 |
| O  | 13.381267548 | 8.083183289  | 1.374727130 | O  | 13.362369537 | 8.131148338  | 1.305229783 | O  | 13.501619339 | 8.136517525  | 1.277848125 |
| O  | 9.860275269  | 4.208618641  | 7.891143322 | O  | 9.844824791  | 4.139489174  | 7.883361340 | O  | 9.990005493  | 4.152224541  | 7.778058052 |
| O  | 13.680101395 | 3.842813492  | 7.252874851 | O  | 14.731277466 | 3.604287148  | 6.287239552 | O  | 15.509853363 | 6.295983791  | 6.943514824 |
| Cu | 7.033030987  | 5.002543926  | 5.738934040 | Cu | 7.098617554  | 5.196922302  | 5.660603046 | Cu | 6.718375683  | 4.669599056  | 6.103753567 |
| H  | 16.588079453 | 5.682204247  | 8.150058746 | H  | 16.631614685 | 5.822062492  | 8.235380173 | H  | 16.327007294 | 6.236563206  | 7.484332085 |
| H  | 13.595416069 | 2.860224724  | 7.389683247 | H  | 15.498949051 | 3.228089333  | 5.805252075 | H  | 15.577535629 | 7.164471149  | 6.512213707 |
| H  | 8.566448212  | 5.329890251  | 3.825814009 | H  | 8.652596474  | 5.242705822  | 3.786848783 | H  | 8.064057350  | 5.460773468  | 4.085179329 |
| H  | 9.201965332  | 4.287885666  | 4.954925537 | H  | 9.205690384  | 4.218263626  | 4.981419086 | H  | 8.934551239  | 4.541306019  | 5.130758286 |
| H  | 8.093734741  | 3.749285221  | 3.859844685 | H  | 8.077343941  | 3.698911190  | 3.896261454 | H  | 7.885331154  | 3.829983234  | 4.081802368 |
| H  | 6.367588520  | 6.001807213  | 7.827770710 | H  | 6.567103386  | 6.117180347  | 7.800505161 | H  | 5.520497322  | 5.349065304  | 8.201860428 |
| H  | 5.078719139  | 6.159590721  | 6.799347401 | H  | 5.590911388  | 6.888619423  | 6.716207027 | H  | 4.469935417  | 4.596444130  | 7.174531460 |
| H  | 5.358051300  | 4.733413219  | 7.566504002 | H  | 5.181744099  | 5.395420074  | 7.269769669 | H  | 5.539917469  | 3.716874599  | 8.053628922 |
| H  | 14.467451096 | 5.941126823  | 7.336335659 | H  | 13.482322693 | 4.992126465  | 7.549225807 | H  | 15.242643356 | 6.397528172  | 0.173173860 |

|   |              |             |             |   |              |             |             |   |              |             |             |
|---|--------------|-------------|-------------|---|--------------|-------------|-------------|---|--------------|-------------|-------------|
| N | 15.280801773 | 5.309307575 | 7.477699757 | N | 14.454825401 | 5.366388321 | 7.616165161 | N | 13.641235352 | 4.550784588 | 8.329545975 |
| N | 8.342117310  | 4.542489529 | 4.461843014 | N | 8.374250412  | 4.503939152 | 4.458147049 | N | 8.007751465  | 4.636926174 | 4.703814983 |
| N | 5.818503857  | 5.520070553 | 7.099030495 | N | 5.970324039  | 5.972254753 | 6.967372417 | N | 5.437171936  | 4.584940910 | 7.510222435 |
| N | 15.005925179 | 4.098842621 | 7.482233524 | N | 15.276358604 | 4.713755131 | 6.978034019 | N | 13.251307487 | 4.016170025 | 7.436425209 |

**Table S10.** Cartesian coordinates of RC, TS, IM, and PC for NH<sub>2</sub>NO decomposition with the assistance of Brønsted acid site and Cu-OH site.

| Structure A |              |              |             | ts1 |              |              | Structure B |    |              |              |             |
|-------------|--------------|--------------|-------------|-----|--------------|--------------|-------------|----|--------------|--------------|-------------|
| Si          | 0.227257073  | 2.294058084  | 8.164631844 | Si  | 0.358432531  | 2.193869829  | 8.110644341 | Si | 0.353486896  | 2.199212074  | 8.111852646 |
| Si          | 8.050048828  | 0.632081985  | 3.010885954 | Si  | 8.177125931  | 0.513422370  | 2.938331127 | Si | 8.170155525  | 0.522795200  | 2.944167852 |
| Si          | 2.538851976  | 8.063424110  | 0.862558365 | Si  | 2.659265518  | 7.930266857  | 0.791991174 | Si | 2.661112070  | 7.929744244  | 0.793447554 |
| Si          | 5.670812607  | 8.235909462  | 1.013125539 | Si  | 5.789811611  | 8.115088463  | 0.955236256 | Si | 5.788879871  | 8.124427795  | 0.962128818 |
| Si          | 7.953561306  | 0.620756507  | 6.146855831 | Si  | 8.081191063  | 0.520889759  | 6.078951359 | Si | 8.077397346  | 0.527296185  | 6.082658291 |
| Si          | 0.236192048  | 5.426086426  | 8.356278419 | Si  | 0.381454349  | 5.340296745  | 8.225779533 | Si | 0.373480260  | 5.342239857  | 8.235597610 |
| Si          | 7.926482201  | 6.060536861  | 0.947603941 | Si  | 8.050441742  | 5.937436581  | 0.910084188 | Si | 8.051071167  | 5.943294525  | 0.912703931 |
| Si          | 5.667494774  | 0.418629289  | 8.281398773 | Si  | 5.799781322  | 0.297217071  | 8.220025063 | Si | 5.792418003  | 0.306757808  | 8.224687576 |
| Si          | 2.557655811  | 0.220767319  | 8.035395622 | Si  | 2.684196711  | 0.116837740  | 7.983008862 | Si | 2.682100773  | 0.119396746  | 7.985501766 |
| Si          | 0.218531087  | 7.966677189  | 2.916809797 | Si  | 0.348185420  | 7.853383541  | 2.849850893 | Si | 0.344173908  | 7.852036953  | 2.852821827 |
| Si          | 8.056827545  | 2.928675413  | 0.869846106 | Si  | 8.197367668  | 2.807255030  | 0.802252829 | Si | 8.188187599  | 2.812397718  | 0.802674770 |
| Si          | 9.623308182  | 2.359350681  | 8.081162453 | Si  | 9.753595352  | 2.259800673  | 8.011541367 | Si | 9.749891281  | 2.262351990  | 8.013829231 |
| Si          | 17.446676254 | 0.674285054  | 3.016959429 | Si  | 17.546672821 | 0.542350411  | 2.956962109 | Si | 17.542842865 | 0.544257522  | 2.958476067 |
| Si          | 11.956520081 | 8.097508430  | 0.829038680 | Si  | 12.086098671 | 7.998184681  | 0.760539174 | Si | 12.080851555 | 8.002239227  | 0.760276318 |
| Si          | 15.098855019 | 8.289270401  | 1.026125550 | Si  | 15.219178200 | 8.159207344  | 0.965657711 | Si | 15.214564323 | 8.162044525  | 0.969475210 |
| Si          | 17.379453659 | 0.546898127  | 6.201852798 | Si  | 17.523714066 | 0.416702807  | 6.137464523 | Si | 17.514707565 | 0.425537258  | 6.137411594 |
| Si          | 9.573420525  | 5.477488041  | 8.255918503 | Si  | 9.679754257  | 5.384588718  | 8.179306984 | Si | 9.682138443  | 5.387062073  | 8.178577423 |
| Si          | 17.408227921 | 6.165337086  | 0.910412610 | Si  | 17.556119919 | 6.043167591  | 0.836526334 | Si | 17.544345856 | 6.039829254  | 0.849900484 |
| Si          | 15.102430344 | 0.513203859  | 8.318581581 | Si  | 15.231083870 | 0.404116213  | 8.253157616 | Si | 15.225428581 | 0.405813873  | 8.256232262 |
| Si          | 12.015844345 | 0.266504943  | 8.091084480 | Si  | 12.152998924 | 0.163119793  | 8.056662560 | Si | 12.145242691 | 0.163595021  | 8.056585312 |
| Si          | 9.627223015  | 7.847440720  | 2.924789190 | Si  | 9.750452042  | 7.728420258  | 2.861964703 | Si | 9.746871948  | 7.737641335  | 2.864406109 |
| Si          | 17.475738525 | 2.994451284  | 0.913157105 | Si  | 17.596092224 | 2.883593082  | 0.847451270 | Si | 17.588706970 | 2.886657715  | 0.850387692 |
| Al          | 0.173007190  | 7.893449783  | 6.081608772 | Al  | 0.338545978  | 7.697438240  | 6.046408176 | Al | 0.328612715  | 7.699970722  | 6.050357819 |
| Al          | 9.700253487  | 7.930838585  | 6.153018951 | Al  | 9.829637527  | 7.812713146  | 6.112696648 | Al | 9.816388130  | 7.810729980  | 6.116774082 |
| O           | 1.657904863  | 1.552659035  | 8.291149139 | O   | 1.794722080  | 1.452568650  | 8.253247261 | O  | 1.786713123  | 1.450989604  | 8.254079819 |
| O           | 0.046466976  | -0.038024753 | 2.757538080 | O   | 0.149643704  | -0.166317552 | 2.702274323 | O  | 0.145475462  | -0.168018430 | 2.710951805 |
| O           | 8.156408310  | 2.074197292  | 2.255585670 | O   | 8.298171997  | 1.957553625  | 2.189124346 | O  | 8.291091919  | 1.964511871  | 2.190582037 |
| O           | 2.367978573  | -0.731123447 | 9.351092339 | O   | 1.830835581  | 8.541586876  | 9.284795761 | O  | 1.830916405  | 8.541452408  | 9.285025597 |
| O           | 1.675999999  | 8.214233398  | 2.215590477 | O   | 1.803623796  | 8.115427971  | 2.149059772 | O  | 1.795654535  | 8.115386009  | 2.145582914 |
| O           | 0.080375291  | 2.803994179  | 0.183523342 | O   | 0.206596315  | 2.690832376  | 0.126287013 | O  | 0.198124409  | 2.701688766  | 0.126158789 |
| O           | 6.510218143  | 6.842235088  | 0.823796988 | O   | 6.640243530  | 6.723623753  | 0.794496655 | O  | 6.645863533  | 6.737578392  | 0.800668240 |
| O           | 8.158751488  | 8.693346024  | 6.314647198 | O   | 8.297857285  | 8.605323792  | 6.248439789 | O  | 8.289792061  | 8.609890938  | 6.249400616 |
| O           | 6.514820576  | 0.417684257  | 6.889702797 | O   | 6.647455692  | 0.301752925  | 6.827737808 | O  | 6.647036076  | 0.316632748  | 6.837191582 |
| O           | 8.084836006  | 5.545006752  | 8.935137749 | O   | 8.212579727  | 5.445683479  | 8.909685135 | O  | 8.218471527  | 5.447893620  | 8.915131569 |
| O           | 0.480536699  | 6.241081238  | 6.903306484 | O   | 0.653240025  | 6.141984463  | 6.844208717 | O  | 0.615742028  | 6.159775734  | 6.864288330 |

|    |              |              |             |    |              |             |             |    |              |             |             |
|----|--------------|--------------|-------------|----|--------------|-------------|-------------|----|--------------|-------------|-------------|
| O  | 5.210544586  | 8.349315643  | 8.998816490 | O  | 5.349683762  | 8.228373528 | 8.940940857 | O  | 5.343198299  | 8.244868279 | 8.953746796 |
| O  | 2.030052185  | 6.740242004  | 0.038615812 | O  | 1.468405247  | 5.866790295 | 9.345348358 | O  | 1.467593312  | 5.866689205 | 9.348877907 |
| O  | -0.627572298 | 1.805666447  | 6.867869377 | O  | -0.479454219 | 1.663251162 | 6.815466881 | O  | -0.482379526 | 1.666306376 | 6.815432072 |
| O  | 6.233915329  | 9.083916664  | 2.299170494 | O  | 6.355170727  | 8.970995903 | 2.232524872 | O  | 6.346308708  | 8.977488518 | 2.246251822 |
| O  | 6.198744774  | 1.588407159  | 9.286903381 | O  | 6.343571186  | 1.468256950 | 9.216649055 | O  | 6.322223663  | 1.480568886 | 9.227262497 |
| O  | -0.558680952 | 6.766777992  | 2.122364044 | O  | -0.408964783 | 6.650726795 | 2.048518658 | O  | -0.424282551 | 6.648334980 | 2.064866543 |
| O  | 1.474328041  | 8.855856895  | 6.692327499 | O  | 1.586001754  | 8.777927399 | 6.627741814 | O  | 1.577425957  | 8.781333923 | 6.629970551 |
| O  | 0.415422648  | 7.520269871  | 4.429128170 | O  | 0.572664320  | 7.416801453 | 4.361466408 | O  | 0.572246015  | 7.421533585 | 4.366281033 |
| O  | 4.120625496  | 0.707977057  | 7.973961353 | O  | 4.256443024  | 0.590200782 | 7.914608955 | O  | 4.249186993  | 0.600068033 | 7.907339096 |
| O  | 7.696641445  | 4.478153706  | 1.233705640 | O  | 7.818723202  | 4.352129459 | 1.170033693 | O  | 7.819492340  | 4.358003616 | 1.173467278 |
| O  | 7.664455414  | 0.951305866  | 4.561915398 | O  | 7.791391373  | 0.821095765 | 4.489778519 | O  | 7.786057949  | 0.841769993 | 4.495050907 |
| O  | 4.119088650  | 7.860156536  | 1.249626875 | O  | 4.245059490  | 7.732983589 | 1.184890151 | O  | 4.244263649  | 7.735557556 | 1.190880179 |
| O  | 0.555222750  | 3.886096001  | 8.008335114 | O  | 0.682502568  | 3.772812843 | 7.930066586 | O  | 0.678878903  | 3.776743889 | 7.930361748 |
| O  | 11.009987831 | 1.548654795  | 8.147159576 | O  | 11.135901451 | 1.441153288 | 8.064588547 | O  | 11.132097244 | 1.443429112 | 8.066995621 |
| O  | 9.496931076  | -0.139277816 | 2.938732862 | O  | 8.930928230  | 9.136628151 | 2.840809107 | O  | 8.924143791  | 9.142672539 | 2.846527815 |
| O  | 17.452304840 | 2.153099775  | 2.310051680 | O  | 17.546060562 | 2.006560564 | 2.223308325 | O  | 17.546127319 | 2.006530762 | 2.223322392 |
| O  | 12.434763908 | 0.137170687  | 0.096085422 | O  | 12.594492912 | 0.078077197 | 0.095405057 | O  | 12.588556290 | 0.082916677 | 0.098219395 |
| O  | 11.064959526 | 8.066085815  | 2.208922386 | O  | 11.182263374 | 7.922086716 | 2.135322809 | O  | 11.175832748 | 7.926358700 | 2.132694006 |
| O  | 9.491877556  | 2.848165035  | 0.104350172 | O  | 9.635562897  | 2.740864992 | 0.043370917 | O  | 9.625172615  | 2.738240957 | 0.040629402 |
| O  | 15.968988419 | 6.925753117  | 0.815624118 | O  | 16.116897583 | 6.817737103 | 0.745718837 | O  | 16.104957581 | 6.814519405 | 0.753893971 |
| O  | 17.456411362 | 8.549657822  | 6.454295635 | O  | 17.617612839 | 8.423964500 | 6.352758884 | O  | 17.608648300 | 8.432126999 | 6.353194714 |
| O  | 15.900121689 | 0.510649085  | 6.909981251 | O  | 16.050033569 | 0.361911356 | 6.857570171 | O  | 16.043027878 | 0.369604588 | 6.858988762 |
| O  | 17.549043655 | 5.652291298  | 8.863080025 | O  | 17.690099716 | 5.500042439 | 8.795925140 | O  | 17.685760498 | 5.490153313 | 8.815680504 |
| O  | 9.485551834  | 6.265483856  | 6.811612606 | O  | 9.529349327  | 6.151991844 | 6.733143806 | O  | 9.529666901  | 6.150214195 | 6.732881069 |
| O  | 14.579623222 | 8.456897736  | 9.052949905 | O  | 14.663953781 | 8.357578278 | 9.009475708 | O  | 14.670336723 | 8.360752106 | 9.013946533 |
| O  | 10.690613747 | 6.166866302  | 9.212605476 | O  | 10.803259850 | 6.119830132 | 9.093510628 | O  | 10.808428764 | 6.120001316 | 9.092341423 |
| O  | 8.710075378  | 1.936625719  | 6.788389683 | O  | 8.826095581  | 1.844088316 | 6.721119881 | O  | 8.825622559  | 1.851098657 | 6.720291615 |
| O  | 15.580098152 | 9.128843307  | 2.343852758 | O  | 15.675204277 | 8.986372948 | 2.300881147 | O  | 15.670586586 | 8.990910530 | 2.303718805 |
| O  | 15.612881660 | 1.704266548  | 9.297034264 | O  | 15.739989281 | 1.612733603 | 9.208456993 | O  | 15.735080719 | 1.615797997 | 9.209116936 |
| O  | 8.775244713  | 6.663435936  | 2.201028109 | O  | 8.882637024  | 6.507760048 | 2.198030472 | O  | 8.880204201  | 6.511341095 | 2.206304789 |
| O  | 11.038781166 | 8.767324448  | 6.780556202 | O  | 11.166163445 | 8.603392601 | 6.792027950 | O  | 11.154524803 | 8.604510307 | 6.793636799 |
| O  | 9.780260086  | 7.277913094  | 4.470247269 | O  | 9.884423256  | 7.192348957 | 4.417579651 | O  | 9.897419930  | 7.204660892 | 4.417647362 |
| O  | 13.531151772 | 0.817929268  | 8.046260834 | O  | 13.662281036 | 0.723142803 | 7.963223457 | O  | 13.657155991 | 0.719369590 | 7.963121414 |
| O  | 17.181844711 | 4.576070309  | 1.174639463 | O  | 17.302650452 | 4.460021496 | 1.140713215 | O  | 17.287763596 | 4.458554745 | 1.156829238 |
| O  | 17.158042908 | 0.866856813  | 4.605229855 | O  | 17.268196106 | 0.751126170 | 4.548962116 | O  | 17.260667801 | 0.758121967 | 4.548888206 |
| O  | 13.519651413 | 7.851439953  | 1.196734905 | O  | 13.639419556 | 7.705054283 | 1.122867346 | O  | 13.634443283 | 7.715346336 | 1.127022862 |
| O  | 9.972995758  | 3.943682194  | 7.935479641 | O  | 10.093250275 | 3.847917795 | 7.876543045 | O  | 10.093306541 | 3.848860979 | 7.877691746 |
| O  | 7.235155582  | 4.726358414  | 4.969709873 | O  | 6.927012444  | 4.968927860 | 5.112761497 | O  | 6.976682663  | 4.889905930 | 5.028701782 |
| O  | 2.837491751  | 5.586835861  | 6.136281013 | O  | 3.221128464  | 5.492689610 | 6.003156185 | O  | 3.236525536  | 5.487166405 | 5.999509335 |
| Cu | 8.681898117  | 5.738032341  | 5.092019081 | Cu | 8.578801155  | 5.807212353 | 4.989091873 | Cu | 8.634617805  | 5.781675339 | 4.941147327 |
| H  | 7.371697903  | 3.771540880  | 4.818645477 | H  | 6.877213001  | 4.002008915 | 5.009030819 | H  | 6.918980598  | 3.917780638 | 5.008216381 |
| H  | 1.434112787  | 5.935556412  | 6.531146526 | H  | 2.262074709  | 5.712466240 | 6.292675495 | H  | 2.292459965  | 5.709177017 | 6.286563873 |
| H  | 5.493740559  | 6.684515953  | 7.181126595 | H  | 5.712522030  | 6.686931133 | 7.260571003 | H  | 5.720037460  | 6.676789761 | 7.258647442 |
| H  | 5.242884636  | 5.478058815  | 5.880572796 | H  | 5.995756149  | 5.415295601 | 5.770622253 | H  | 6.179055691  | 5.291274548 | 5.624044895 |



| N           | 4.874226093  | 6.121158123  | 6.600222111 | N   | 5.219201088  | 6.083424091  | 6.587530136 | N           | 5.235007763  | 6.068652153  | 6.580865383 |
|-------------|--------------|--------------|-------------|-----|--------------|--------------|-------------|-------------|--------------|--------------|-------------|
| N           | 3.611482382  | 6.279901028  | 6.850924969 | N   | 3.986316681  | 6.219857216  | 6.807664871 | N           | 4.011894703  | 6.223193169  | 6.813156128 |
| Structure C |              |              |             | ts2 |              |              |             | Structure D |              |              |             |
| Si          | 0.271372199  | 2.263347149  | 8.084304810 | Si  | 0.306181192  | 2.231101274  | 8.083886147 | Si          | 0.190293133  | 2.254880905  | 8.088196754 |
| Si          | 8.089137077  | 0.558627844  | 2.917463064 | Si  | 8.130288124  | 0.575033247  | 2.918923855 | Si          | 7.993357658  | 0.577717781  | 2.999191046 |
| Si          | 2.600762367  | 7.974951744  | 0.766693115 | Si  | 2.632713079  | 7.965239048  | 0.760139763 | Si          | 2.548017740  | 8.045430183  | 0.824557900 |
| Si          | 5.717781544  | 8.172402382  | 0.917065382 | Si  | 5.753679276  | 8.186406136  | 0.918476045 | Si          | 5.666957378  | 8.188989639  | 1.006712198 |
| Si          | 7.994875431  | 0.588842988  | 6.056016445 | Si  | 8.033202171  | 0.615554452  | 6.061374187 | Si          | 7.939002991  | 0.510988951  | 6.122809887 |
| Si          | 0.273694098  | 5.394132137  | 8.213074684 | Si  | 0.310141563  | 5.372972965  | 8.210253716 | Si          | 0.163251102  | 5.358098507  | 8.320899963 |
| Si          | 8.002494812  | 5.999255180  | 0.892300487 | Si  | 8.033378601  | 6.001741886  | 0.904486120 | Si          | 7.950582027  | 6.037925720  | 0.919635832 |
| Si          | 5.702856541  | 0.375768125  | 8.197259903 | Si  | 5.742079258  | 0.377876580  | 8.209044456 | Si          | 5.646907330  | 0.440927327  | 8.280582428 |
| Si          | 2.608120918  | 0.171133161  | 7.974035263 | Si  | 2.643981218  | 0.158521354  | 7.957502365 | Si          | 2.570823908  | 0.160508037  | 8.080407143 |
| Si          | 0.293543160  | 7.891979694  | 2.850593090 | Si  | 0.323106706  | 7.883405209  | 2.825366020 | Si          | 0.224285647  | 7.819238663  | 2.932998419 |
| Si          | 8.094725609  | 2.86611279   | 0.776597261 | Si  | 8.135442734  | 2.872432470  | 0.789399147 | Si          | 7.994785309  | 2.921765327  | 0.864441872 |
| Si          | 9.668260574  | 2.318382025  | 7.975821495 | Si  | 9.702101707  | 2.334753513  | 7.974720955 | Si          | 9.638217926  | 2.275795221  | 8.119881630 |
| Si          | 17.505685806 | 0.602797627  | 2.946865797 | Si  | 17.528379440 | 0.584748805  | 2.934960842 | Si          | 17.457256317 | 0.558265209  | 2.995025635 |
| Si          | 12.024972916 | 8.056153297  | 0.762621939 | Si  | 12.052605629 | 8.055949211  | 0.771981895 | Si          | 11.946909904 | 7.974728107  | 0.809585273 |
| Si          | 15.163311958 | 8.225243568  | 0.949702322 | Si  | 15.187088013 | 8.207188606  | 0.945884347 | Si          | 15.088007927 | 8.185092926  | 1.003541946 |
| Si          | 17.427293777 | 0.498987913  | 6.117338181 | Si  | 17.457387924 | 0.449886888  | 6.114904404 | Si          | 17.338376999 | 0.531504929  | 6.149899960 |
| Si          | 9.667288780  | 5.439402103  | 8.193424225 | Si  | 9.682588577  | 5.447596550  | 8.195762634 | Si          | 9.614931107  | 5.401461124  | 8.244976044 |
| Si          | 17.463716507 | 6.074891567  | 0.879513681 | Si  | 17.502553940 | 6.070206165  | 0.838352978 | Si          | 17.351900101 | 6.019563675  | 0.984524965 |
| Si          | 15.150936127 | 0.455607116  | 8.245883942 | Si  | 15.181611061 | 0.436052322  | 8.235512733 | Si          | 15.081583977 | 0.393731296  | 8.290100098 |
| Si          | 12.073808670 | 0.202940762  | 8.005154610 | Si  | 12.100564003 | 0.204963148  | 8.026082993 | Si          | 11.969279289 | 0.204477131  | 8.054902077 |
| Si          | 9.685140610  | 7.794012547  | 2.856215000 | Si  | 9.716934204  | 7.787644386  | 2.866927385 | Si          | 9.630016327  | 7.865817070  | 2.894259453 |
| Si          | 17.528347015 | 2.935675144  | 0.854219079 | Si  | 17.570646286 | 2.916856527  | 0.840855837 | Si          | 17.463712692 | 2.887426615  | 0.881282508 |
| Al          | 0.244753480  | 7.748501778  | 6.037213326 | Al  | 0.282659411  | 7.740865231  | 6.019427776 | Al          | 0.187581211  | 7.846695423  | 6.065891266 |
| Al          | 9.757614136  | 7.878358841  | 6.095009327 | Al  | 9.775730133  | 7.881366730  | 6.108455181 | Al          | 9.660665512  | 7.824479103  | 6.121272087 |
| O           | 1.688351393  | 1.486733556  | 8.228976250 | O   | 1.739717960  | 1.484706640  | 8.219155312 | O           | 1.595471859  | 1.464730263  | 8.144721985 |
| O           | 0.101899341  | -0.123804249 | 2.713287354 | O   | 0.122258723  | -0.138182402 | 2.675789118 | O           | 0.069233730  | -0.173029765 | 2.839313269 |
| O           | 8.212471962  | 1.989614487  | 2.144623756 | O   | 8.291161537  | 2.012831688  | 2.163735151 | O           | 8.007260323  | 1.975682497  | 2.179348946 |
| O           | 1.800996423  | 8.611076355  | 9.291895866 | O   | 1.819273949  | 8.587945938  | 9.266568184 | O           | 3.124959707  | 0.116697900  | 0.146888629 |
| O           | 1.740121484  | 8.135698318  | 2.124505043 | O   | 1.777440190  | 8.138591766  | 2.119912624 | O           | 1.654390097  | 8.017709732  | 2.168805122 |
| O           | 0.125531346  | 2.780974388  | 0.104113825 | O   | 0.178331330  | 2.742280483  | 0.114385277 | O           | 0.068329237  | 2.805437565  | 0.121321052 |
| O           | 6.610438824  | 6.808557987  | 0.714257658 | O   | 6.643241405  | 6.817225456  | 0.765781760 | O           | 6.536375046  | 6.830019951  | 0.765772343 |
| O           | 8.265489578  | 8.728549004  | 6.290737152 | O   | 8.294583321  | 8.749819756  | 6.299938202 | O           | 8.019188881  | 8.481101990  | 6.205332756 |
| O           | 6.576491833  | 0.400954545  | 6.822480202 | O   | 6.617307663  | 0.440734446  | 6.836389065 | O           | 6.512068748  | 0.401498854  | 6.905199051 |
| O           | 8.186217308  | 5.490274906  | 8.898783684 | O   | 8.201532364  | 5.488073349  | 8.901523590 | O           | 8.107933044  | 5.459431171  | 8.907864571 |
| O           | 0.407833517  | 6.216575623  | 6.850459576 | O   | 0.530914545  | 6.189311504  | 6.833820820 | O           | 0.056408107  | 6.103056431  | 6.785833359 |
| O           | 5.243330956  | 8.321090698  | 8.928771973 | O   | 5.287528992  | 8.310165405  | 8.915562630 | O           | 5.146671295  | 8.414431572  | 9.067959785 |
| O           | 1.393286467  | 5.940534592  | 9.291788101 | O   | 1.418869972  | 5.917397499  | 9.299202919 | O           | 1.295780897  | 6.146055698  | 9.151462555 |
| O           | -0.580385745 | 1.748281479  | 6.791074753 | O   | -0.558578610 | 1.695829391  | 6.808360100 | O           | 18.124853134 | 1.831173182  | 6.804898262 |
| O           | 6.283269405  | 8.996604919  | 2.217368126 | O   | 6.303840160  | 9.050837517  | 2.199976683 | O           | 6.178204536  | 8.965959549  | 2.350557566 |
| O           | 6.225193977  | 1.558906555  | 9.195475578 | O   | 6.252386093  | 1.540749311  | 9.238375664 | O           | 6.124241352  | 1.676466227  | 9.225127220 |
| O           | -0.512908459 | 6.690604210  | 2.098060608 | O   | -0.449554265 | 6.684592724  | 2.035433292 | O           | -0.613635719 | 6.622674942  | 2.201285362 |

|    |              |              |             |    |              |              |             |    |              |              |             |
|----|--------------|--------------|-------------|----|--------------|--------------|-------------|----|--------------|--------------|-------------|
| O  | 1.516407251  | 8.789619446  | 6.640825272 | O  | 1.551306844  | 8.787289619  | 6.617938995 | O  | 1.510378838  | 8.567368507  | 6.877892971 |
| O  | 0.545726299  | 7.469570160  | 4.361250877 | O  | 0.543508530  | 7.452206612  | 4.338886261 | O  | 0.490180016  | 7.368873596  | 4.444667339 |
| O  | 4.165061474  | 0.675149560  | 7.866061211 | O  | 4.202102661  | 0.663358331  | 7.869575500 | O  | 4.094339848  | 0.705139041  | 7.907877922 |
| O  | 7.756297112  | 4.417578220  | 1.158189297 | O  | 7.777685165  | 4.421076775  | 1.160447836 | O  | 7.677930355  | 4.471223354  | 1.267465115 |
| O  | 7.702309132  | 0.868963540  | 4.469197750 | O  | 7.737752914  | 0.877269149  | 4.471048832 | O  | 7.620597363  | 0.868673563  | 4.558227539 |
| O  | 4.182686806  | 7.752600670  | 1.158514261 | O  | 4.217447758  | 7.757623196  | 1.148728728 | O  | 4.108027935  | 7.730499268  | 1.173562884 |
| O  | 0.613826036  | 3.834446907  | 7.899487495 | O  | 0.624971390  | 3.810557365  | 7.893076420 | O  | 0.568751216  | 3.847918510  | 7.928533554 |
| O  | 11.025834084 | 1.463629246  | 7.995767593 | O  | 11.047566414 | 1.462035060  | 8.012727737 | O  | 11.047705650 | 1.519417048  | 8.331548691 |
| O  | 9.542063713  | -0.204265520 | 2.854652643 | O  | 9.568744659  | -0.213366002 | 2.849020243 | O  | 9.464976311  | -0.141767129 | 2.890475035 |
| O  | 17.541872025 | 2.074350595  | 2.236811399 | O  | 17.550848007 | 2.060207844  | 2.228119135 | O  | 17.533588409 | 2.008127213  | 2.246026039 |
| O  | 12.484205246 | 0.096634872  | 0.027979087 | O  | 12.526183128 | 0.108407721  | 0.057563014 | O  | 11.052551270 | 8.592310905  | 9.324427605 |
| O  | 11.116257668 | 8.007413864  | 2.134117603 | O  | 11.152372360 | 7.998375416  | 2.148466349 | O  | 11.071249008 | 8.091526985  | 2.186710835 |
| O  | 8.827936172  | 2.052082300  | 9.347046852 | O  | 8.855365753  | 2.070293665  | 9.339844704 | O  | 9.427896500  | 2.816142559  | 0.097572371 |
| O  | 16.030490875 | 6.860230446  | 0.767460465 | O  | 16.063386917 | 6.846543789  | 0.759131849 | O  | 15.936655045 | 6.796891689  | 0.830480278 |
| O  | 17.543300629 | 8.522833824  | 6.328577995 | O  | 17.564908981 | 8.466631889  | 6.331856251 | O  | 17.515586853 | 8.595764160  | 6.377632618 |
| O  | 15.949343681 | 0.440012276  | 6.835763454 | O  | 15.972901344 | 0.396991074  | 6.820958138 | O  | 15.885028839 | 0.403886974  | 6.879155159 |
| O  | 17.610227585 | 5.508543491  | 8.855898857 | O  | 17.629604340 | 5.521596909  | 8.796794891 | O  | 17.525388718 | 5.465098381  | 8.958748817 |
| O  | 9.553725243  | 6.236970425  | 6.772085190 | O  | 9.549742699  | 6.237431526  | 6.772210121 | O  | 9.621354103  | 6.257300854  | 6.884467602 |
| O  | 14.609252930 | 8.392562866  | 8.969666481 | O  | 14.630414963 | 8.374213219  | 8.965866089 | O  | 14.615081787 | 8.342460632  | 9.025493622 |
| O  | 10.789545059 | 6.107157230  | 9.152070045 | O  | 10.801976204 | 6.130747318  | 9.144427299 | O  | 10.726292610 | 5.945384979  | 9.321141243 |
| O  | 8.712171555  | 1.985861301  | 6.651547909 | O  | 8.747943878  | 2.016322613  | 6.647472382 | O  | 8.843089104  | 1.713960648  | 6.789874554 |
| O  | 15.638926506 | 9.074172020  | 2.258261681 | O  | 15.651233673 | 9.059581757  | 2.256892443 | O  | 15.614771843 | 9.010862350  | 2.313874245 |
| O  | 15.670741081 | 1.631443262  | 9.234678268 | O  | 15.722135544 | 1.620542288  | 9.205314636 | O  | 15.615510941 | 1.589509010  | 9.261653900 |
| O  | 8.833398819  | 6.567606926  | 2.180739641 | O  | 8.878728867  | 6.552537918  | 2.190000296 | O  | 8.802180290  | 6.665257454  | 2.159742594 |
| O  | 11.130990982 | 8.675696373  | 6.709793091 | O  | 11.147059441 | 8.663782120  | 6.743343830 | O  | 11.566499710 | -0.501845479 | 6.672058582 |
| O  | 9.852280617  | 7.248164654  | 4.404432297 | O  | 9.858835220  | 7.250144005  | 4.418905735 | O  | 9.812074661  | 7.282129288  | 4.417486668 |
| O  | 13.576298714 | 0.790503085  | 7.979438782 | O  | 13.607256889 | 0.786017060  | 7.981492996 | O  | 13.519707680 | 0.686409116  | 8.017417908 |
| O  | 17.191110611 | 4.495068550  | 1.178633094 | O  | 17.255649567 | 4.487488747  | 1.140883565 | O  | 17.113853455 | 4.435619831  | 1.251507282 |
| O  | 17.175539017 | 0.807466269  | 4.526436806 | O  | 17.222196579 | 0.773465395  | 4.521772861 | O  | 17.097152710 | 0.824659586  | 4.557985306 |
| O  | 13.578947067 | 7.808875561  | 1.141076326 | O  | 13.605446815 | 7.784180164  | 1.137381554 | O  | 13.520933151 | 7.792426586  | 1.196286678 |
| O  | 10.042495728 | 3.897185564  | 7.852427959 | O  | 10.087632179 | 3.910199404  | 7.865829945 | O  | 9.946628571  | 3.849693298  | 7.877831936 |
| O  | 7.691497803  | 4.203967094  | 5.261938095 | O  | 7.572052002  | 4.245125771  | 5.239208698 | O  | 9.190328598  | 3.755364180  | 4.408706665 |
| O  | 5.747478008  | 5.599830627  | 6.685671329 | O  | 5.422794342  | 5.508384705  | 6.535003662 | O  | 7.132204533  | 6.296447754  | 4.937313557 |
| Cu | 8.915029526  | 5.615236282  | 4.923836708 | Cu | 8.840571404  | 5.648462296  | 4.939664364 | Cu | 8.936812401  | 5.489708900  | 4.624297619 |
| H  | 8.036022186  | 3.410330057  | 5.757132053 | H  | 7.905267715  | 3.475313425  | 5.770238876 | H  | 9.326648712  | 3.249498129  | 5.232645988 |
| H  | 6.120028019  | 6.073189259  | 7.459844589 | H  | 5.921800613  | 5.905423641  | 7.280213833 | H  | 7.260403633  | 7.140138149  | 5.473428726 |
| H  | 2.688279390  | 5.525434017  | 6.116423130 | H  | 2.199142456  | 5.805225372  | 6.445977688 | H  | 0.061014116  | 5.457931042  | 6.052116394 |
| H  | 6.876494408  | 4.539251804  | 5.730441570 | H  | 6.692910671  | 4.537851810  | 5.606054783 | H  | 6.485240459  | 5.748807907  | 5.421349525 |
| N  | 3.694871902  | 5.310109615  | 5.954679489 | N  | 3.197762728  | 5.526629448  | 6.151025295 | N  | 3.447720528  | 5.396259785  | 6.631088734 |
| N  | 4.315746784  | 5.852937222  | 6.850347042 | N  | 4.012331486  | 5.889706612  | 6.950294495 | N  | 4.530936718  | 5.409510612  | 6.377859116 |

**Table S11.** Cartesian coordinates of RC, TS, IM, and PC for HONO reacting with NH<sub>3</sub> over Brønsted acid sites.

| Structure A |              |              |             | Structure B |              |              |             | Structure C |              |              |             |
|-------------|--------------|--------------|-------------|-------------|--------------|--------------|-------------|-------------|--------------|--------------|-------------|
| Si          | 0.134118378  | 2.561081409  | 7.955313206 | Si          | 0.131355524  | 2.560137749  | 7.916229725 | Si          | 0.118816733  | 2.603334188  | 7.905612469 |
| Si          | 7.951905727  | 0.798972607  | 2.874207020 | Si          | 7.965430737  | 0.795575202  | 2.824816465 | Si          | 7.944492817  | 0.828678250  | 2.818669796 |
| Si          | 2.408786297  | 8.267505646  | 0.709969342 | Si          | 2.421511173  | 8.283834457  | 0.657477498 | Si          | 2.409761429  | 8.320907593  | 0.669795036 |
| Si          | 5.535919666  | 8.417325974  | 0.937307298 | Si          | 5.553153992  | 8.424476624  | 0.865434766 | Si          | 5.523399830  | 8.457907677  | 0.873680472 |
| Si          | 7.903047085  | 0.747194767  | 6.015156746 | Si          | 7.911586285  | 0.756578386  | 5.945364952 | Si          | 7.896413803  | 0.764602542  | 5.948983669 |
| Si          | 0.109300375  | 5.727715015  | 8.142247200 | Si          | 0.089184582  | 5.744328499  | 8.081629753 | Si          | 0.089171290  | 5.778854370  | 8.092170715 |
| Si          | 0.156267613  | 8.023009300  | 6.001770020 | Si          | 0.158683479  | 8.024514198  | 5.938212872 | Si          | 0.158147961  | 8.070758820  | 5.947566986 |
| Si          | 5.591286182  | 0.537940025  | 8.143857002 | Si          | 5.592920780  | 0.590225935  | 8.065558434 | Si          | 5.572577477  | 0.616803765  | 8.071134567 |
| Si          | 2.452385426  | 0.438322127  | 7.953846455 | Si          | 2.460889816  | 0.454867482  | 7.886383057 | Si          | 2.454432964  | 0.497369230  | 7.906189919 |
| Si          | 0.133671060  | 8.098860741  | 2.914130926 | Si          | 0.144423619  | 8.110278130  | 2.840407372 | Si          | 0.127860606  | 8.115077019  | 2.852208853 |
| Si          | 7.974069595  | 3.090702295  | 0.732858837 | Si          | 7.963504314  | 3.116006851  | 0.660797536 | Si          | 7.959401131  | 3.143176079  | 0.666560531 |
| Si          | 9.558878899  | 2.578785658  | 7.964753151 | Si          | 9.566974640  | 2.579653025  | 7.909929276 | Si          | 9.556051254  | 2.601203442  | 7.909271717 |
| Si          | 17.427921295 | 0.797460079  | 2.897426844 | Si          | 17.417140961 | 0.808746338  | 2.851726294 | Si          | 17.367254257 | 0.810925066  | 2.835654497 |
| Si          | 11.818692207 | 8.299064636  | 0.719020724 | Si          | 11.847272873 | 8.294835091  | 0.672826588 | Si          | 11.832078934 | 8.312492371  | 0.648969293 |
| Si          | 14.947058678 | 8.476725578  | 0.927400291 | Si          | 14.978002548 | 8.425573349  | 0.897479951 | Si          | 14.963542938 | 8.432023048  | 0.885218620 |
| Si          | 17.338468552 | 0.729476869  | 6.005726337 | Si          | 17.339420319 | 0.725651264  | 5.971060753 | Si          | 17.338659286 | 0.771958888  | 5.952107906 |
| Si          | 9.526116371  | 5.732901573  | 8.145342827 | Si          | 9.585157394  | 5.732308388  | 8.099978447 | Si          | 9.539560318  | 5.760415554  | 8.066803932 |
| Si          | 9.577989578  | 8.051584244  | 6.007084846 | Si          | 9.596933365  | 8.055705070  | 5.945232391 | Si          | 9.575222015  | 8.071928024  | 5.929465294 |
| Si          | 15.022326469 | 0.568470478  | 8.122057915 | Si          | 15.028452873 | 0.551687300  | 8.108777046 | Si          | 15.012292862 | 0.590275466  | 8.092809677 |
| Si          | 11.881295204 | 0.466212690  | 7.945205212 | Si          | 11.892393112 | 0.457136691  | 7.899489880 | Si          | 11.877549171 | 0.481844068  | 7.892213345 |
| Si          | 9.544570923  | 8.048624992  | 2.896401405 | Si          | 9.540360451  | 8.079306602  | 2.855981827 | Si          | 9.544708252  | 8.111007690  | 2.825021982 |
| Si          | 17.384313583 | 3.082463264  | 0.722034931 | Si          | 17.402229309 | 3.087737560  | 0.685989201 | Si          | 17.358804703 | 3.124419689  | 0.675552905 |
| Al          | 7.860424995  | 6.257886887  | 0.961674213 | Al          | 7.880346298  | 6.276531219  | 0.912366033 | Al          | 7.863552570  | 6.310354233  | 0.874682844 |
| Al          | 17.356042862 | 6.238718510  | 0.957931757 | Al          | 17.300361633 | 6.296202183  | 0.863413632 | Al          | 17.297565460 | 6.314202309  | 0.895823240 |
| O           | 1.604685903  | 1.833231211  | 8.059637070 | O           | 1.617508411  | 1.852402329  | 7.995191574 | O           | 1.592760324  | 1.882894278  | 8.029150009 |
| O           | 0.073470235  | 0.159893483  | 2.859815359 | O           | 0.060270727  | 0.159452364  | 2.788832188 | O           | -0.000200123 | 0.139328510  | 2.768383503 |
| O           | 8.082328796  | 2.213254213  | 2.099241257 | O           | 8.013888359  | 2.180028439  | 1.990383387 | O           | 8.009801865  | 2.230473518  | 2.012171507 |
| O           | 2.194242477  | -0.449140221 | 9.294494629 | O           | 2.253553867  | -0.425360829 | 9.242017746 | O           | 2.257407665  | -0.383314431 | 9.260423660 |
| O           | 1.498776674  | 8.243169785  | 2.039254904 | O           | 1.538776278  | 8.293490410  | 2.002542257 | O           | 1.502785325  | 8.337084770  | 1.997307539 |
| O           | -0.695561528 | 2.230155230  | 9.317316055 | O           | -0.680976987 | 2.184336185  | 9.274267197 | O           | -0.740991175 | 2.245692015  | 9.244107246 |
| O           | 6.307968140  | 7.031661987  | 0.789639413 | O           | 6.324032784  | 7.039852142  | 0.592699349 | O           | 6.308738232  | 7.084731102  | 0.628083467 |
| O           | 8.113528252  | 8.780733109  | 6.169999123 | O           | 8.131138802  | 8.794734001  | 6.068514347 | O           | 8.104114532  | 8.795661926  | 6.076663017 |
| O           | 6.470849991  | 0.466600597  | 6.764072895 | O           | 6.484675407  | 0.458317280  | 6.698778629 | O           | 6.466969490  | 0.484164894  | 6.704319477 |
| O           | 8.113413811  | 5.901329041  | 8.876756668 | O           | 8.186309814  | 5.890966415  | 8.862945557 | O           | 8.105722427  | 5.904100895  | 8.772727013 |
| O           | 0.118806750  | 6.585962772  | 6.754487038 | O           | 0.158690393  | 6.575236797  | 6.673725605 | O           | 0.132280797  | 6.628772736  | 6.694990158 |
| O           | 5.022032261  | 8.490808487  | 8.880500793 | O           | 5.029392242  | 8.575945854  | 8.861207962 | O           | 4.959789753  | 8.593370438  | 8.852659225 |
| O           | 1.369085550  | 6.260035038  | 9.084244728 | O           | 1.350525379  | 6.279909134  | 9.035902977 | O           | 1.347184896  | 6.323596478  | 9.037898064 |
| O           | 18.153478622 | 1.988218427  | 6.661720276 | O           | 18.155448914 | 1.994094133  | 6.616743565 | O           | -0.673061967 | 2.030460119  | 6.594034195 |
| O           | 6.748931885  | -0.071649551 | 2.195685863 | O           | 6.819802284  | -0.171684429 | 2.168694496 | O           | 6.772389412  | -0.099245235 | 2.160348654 |
| O           | 6.139074802  | 1.712344289  | 9.105365753 | O           | 6.137375355  | 1.806694746  | 8.980415344 | O           | 6.139238358  | 1.810614944  | 8.996880531 |
| O           | 17.999334335 | 6.957597733  | 2.371873379 | O           | 18.068773270 | 6.943125248  | 2.268468380 | O           | 18.090656281 | 6.897980690  | 2.318280935 |
| O           | 2.004136801  | -0.415289313 | 6.650074482 | O           | 1.999133945  | -0.406694174 | 6.596296310 | O           | 1.996591806  | -0.367691040 | 6.616418839 |
| O           | 0.560343504  | 7.778146744  | 4.455171108 | O           | 0.563298285  | 7.802437782  | 4.390697956 | O           | 0.576591849  | 7.858085155  | 4.403711796 |

|    |              |              |             |    |              |              |             |    |              |              |             |
|----|--------------|--------------|-------------|----|--------------|--------------|-------------|----|--------------|--------------|-------------|
| O  | 4.024669170  | 0.859844089  | 7.796533108 | O  | 4.030877590  | 0.886753798  | 7.697370529 | O  | 4.014889240  | 0.955804348  | 7.710230827 |
| O  | 7.510536194  | 4.569797039  | 1.067865491 | O  | 7.521576881  | 4.592734814  | 1.048021317 | O  | 7.517200470  | 4.624160767  | 1.025426984 |
| O  | 7.593931198  | 1.067791581  | 4.451297760 | O  | 7.575108528  | 1.098153830  | 4.390084267 | O  | 7.570318222  | 1.106434703  | 4.392642498 |
| O  | 3.950289965  | 8.122706413  | 1.171354175 | O  | 3.976143837  | 8.099179268  | 1.098297119 | O  | 3.951495647  | 8.125478745  | 1.135061979 |
| O  | 0.428185582  | 4.154460907  | 7.782344341 | O  | 0.412882566  | 4.158943176  | 7.760523796 | O  | 0.413079858  | 4.198172569  | 7.746341705 |
| O  | 11.014599800 | 1.839357018  | 8.044166565 | O  | 11.006712914 | 1.819612265  | 7.989470005 | O  | 11.020131111 | 1.869091511  | 8.001955986 |
| O  | 9.384794235  | 0.045707241  | 2.773640633 | O  | 9.441421509  | 0.119617313  | 2.781007051 | O  | 9.406487465  | 0.129579812  | 2.734662533 |
| O  | 17.450513840 | 2.185099602  | 2.079757452 | O  | 17.461429596 | 2.218837261  | 2.063538313 | O  | 17.411510468 | 2.206819773  | 2.014188051 |
| O  | 11.626618385 | -0.434985042 | 9.285312653 | O  | 11.615348816 | -0.446959555 | 9.230908394 | O  | 11.635787964 | -0.395044237 | 9.242353439 |
| O  | 10.933187485 | 8.279993057  | 2.055707455 | O  | 10.899599075 | 8.251281738  | 1.969947696 | O  | 10.923444748 | 8.314582825  | 1.977779388 |
| O  | 8.742293358  | 2.282764912  | 9.337866783 | O  | 8.741820335  | 2.307214022  | 9.287561417 | O  | 8.737209320  | 2.322967529  | 9.287977219 |
| O  | 15.651627541 | 6.960226536  | 0.711839437 | O  | 15.647325516 | 6.961722374  | 0.694883704 | O  | 15.682245255 | 7.007496357  | 0.679329634 |
| O  | 17.541114807 | 8.762537003  | 6.144835472 | O  | 17.541088104 | 8.755270004  | 6.105477810 | O  | 17.539560318 | 8.805416107  | 6.079873085 |
| O  | 15.912351608 | 0.506722867  | 6.767188549 | O  | 15.914919853 | 0.517951608  | 6.743546009 | O  | 15.925971985 | 0.564368904  | 6.748755455 |
| O  | 17.553510666 | 5.901756287  | 8.898265839 | O  | 17.518249512 | 5.956795692  | 8.788027763 | O  | 17.525871277 | 5.948843956  | 8.821502686 |
| O  | 9.530913353  | 6.607845783  | 6.762314320 | O  | 9.531936646  | 6.625264168  | 6.727293491 | O  | 9.520335197  | 6.623496532  | 6.672986507 |
| O  | 14.479973793 | 8.528560638  | 8.901637077 | O  | 14.458735466 | 8.512035370  | 8.864173889 | O  | 14.466836929 | 8.583073616  | 8.887024879 |
| O  | 10.795670509 | 6.271127224  | 9.092381477 | O  | 10.865950584 | 6.257495403  | 9.030368805 | O  | 10.772766113 | 6.316706657  | 9.011185646 |
| O  | 8.685584068  | 2.012169361  | 6.694440842 | O  | 8.686926842  | 2.017080784  | 6.641011238 | O  | 8.691465378  | 2.015722275  | 6.643001556 |
| O  | 15.641790390 | 9.171888351  | 2.200827122 | O  | 16.296968460 | -0.166108981 | 2.160607815 | O  | 16.219789505 | -0.148635626 | 2.178585529 |
| O  | 15.531282425 | 1.742200851  | 9.103469849 | O  | 15.534072876 | 1.741334438  | 9.078145981 | O  | 15.453433990 | 1.837057233  | 9.050531387 |
| O  | 8.722639084  | 6.795496941  | 2.364237070 | O  | 8.618877411  | 6.882349491  | 2.349076986 | O  | 8.676043510  | 6.886732101  | 2.289054632 |
| O  | 11.426672935 | -0.401315928 | 6.652303696 | O  | 11.443022728 | -0.396535963 | 6.590310574 | O  | 11.411768913 | -0.376844019 | 6.596692085 |
| O  | 9.961421013  | 7.824323177  | 4.459144592 | O  | 9.990856171  | 7.799662590  | 4.402043343 | O  | 9.976611137  | 7.862113476  | 4.382895947 |
| O  | 13.456161499 | 0.836767614  | 7.767048359 | O  | 13.461631775 | 0.850882649  | 7.738799095 | O  | 13.448876381 | 0.884446859  | 7.701896667 |
| O  | 16.997234344 | 4.574660778  | 1.103084087 | O  | 17.050659180 | 4.599616051  | 0.989103794 | O  | 16.971445084 | 4.619252205  | 1.027525663 |
| O  | 16.994567871 | 1.057507873  | 4.446166992 | O  | 17.002122879 | 1.052455425  | 4.414551258 | O  | 16.980442047 | 1.100792408  | 4.399996758 |
| O  | 13.382565498 | 8.145156860  | 1.161913872 | O  | 13.384772301 | 8.165777206  | 1.159496069 | O  | 13.375039101 | 8.143008232  | 1.102395058 |
| O  | 9.854921341  | 4.172587395  | 7.767539978 | O  | 9.883424759  | 4.170289040  | 7.699464798 | O  | 9.872880936  | 4.190468311  | 7.698404789 |
| O  | 13.192711830 | 4.809796333  | 8.776857376 | O  | 13.198360443 | 4.589677811  | 9.166090012 | O  | 15.126607895 | 4.392337322  | 6.978439808 |
| O  | 14.398751259 | 4.042540550  | 7.068141937 | O  | 14.816473961 | 4.186621666  | 7.285434723 | Cu | 4.795157433  | 5.284216404  | 7.855251312 |
| Cu | 4.830347061  | 5.221511841  | 7.752637386 | Cu | 4.856901169  | 5.274768353  | 7.946799755 | H  | 5.679315090  | 7.288332939  | 6.682787895 |
| H  | 5.684352398  | 7.259094238  | 6.622986317 | H  | 5.734469891  | 7.257204533  | 6.724892139 | H  | 6.864923477  | 6.325895786  | 7.304791451 |
| H  | 6.869990349  | 6.365970135  | 7.333458424 | H  | 6.931061268  | 6.319294930  | 7.356138706 | H  | 6.177119255  | 5.965127945  | 5.833637238 |
| H  | 6.305262566  | 5.953998089  | 5.829193592 | H  | 6.237615108  | 5.920512676  | 5.900054932 | H  | 4.868408680  | 4.608322620  | 0.327712625 |
| H  | 5.010333538  | 4.603217602  | 0.282980144 | H  | 4.824250221  | 4.571620464  | 0.368171155 | H  | 2.858731747  | 4.776160717  | 9.236694336 |
| H  | 2.963468790  | 4.729351997  | 9.228731155 | H  | 2.845111609  | 4.755897045  | 9.223444939 | H  | 3.217841864  | 3.381179333  | 8.430926323 |
| H  | 3.310549736  | 3.317337036  | 8.447588921 | H  | 3.234581470  | 3.368799686  | 8.420397758 | H  | 12.524885178 | 4.220276833  | 8.895798683 |
| H  | 15.015783310 | 6.324695110  | 0.222650096 | H  | 14.616074562 | 5.970446587  | 0.212802574 | H  | 13.981546402 | 3.313204288  | 9.085670471 |
| H  | 12.275386810 | 5.195951939  | 8.841098785 | H  | 12.351723671 | 5.107643127  | 9.096516609 | H  | 14.678177834 | 5.746303082  | 0.072935499 |
| N  | 6.022113323  | 6.301082611  | 6.747756481 | N  | 6.040246964  | 6.285834312  | 6.833711147 | N  | 5.977285385  | 6.313016891  | 6.773297787 |
| N  | 3.730306387  | 4.153249264  | 8.863466263 | N  | 3.633958578  | 4.175408363  | 8.910810471 | N  | 3.633430481  | 4.196286201  | 8.892095566 |
| N  | 13.313948631 | 4.412539482  | 7.309959412 | N  | 13.697338104 | 4.391494274  | 7.353643417 | N  | 14.010404587 | 4.629130363  | 7.158101559 |
|    |              |              |             | N  |              |              |             | N  | 13.546985626 | 4.224853039  | 8.879023552 |

| ts |              |              | Structure D |    |              |              |             |
|----|--------------|--------------|-------------|----|--------------|--------------|-------------|
| Si | 0.179807663  | 2.621118307  | 7.847490311 | Si | 0.136190772  | 2.605375528  | 7.869923592 |
| Si | 7.977144241  | 0.840496182  | 2.766021967 | Si | 7.950939178  | 0.837282777  | 2.800278902 |
| Si | 2.467324018  | 8.292108536  | 0.600917876 | Si | 2.434429646  | 8.296873093  | 0.628937244 |
| Si | 5.566685200  | 8.458027840  | 0.843452334 | Si | 5.540981293  | 8.461464882  | 0.862829447 |
| Si | 7.945686340  | 0.782588363  | 5.900082588 | Si | 7.913362503  | 0.772564650  | 5.936984539 |
| Si | 0.169882655  | 5.782789707  | 8.021180153 | Si | 0.128044724  | 5.777682781  | 8.053009987 |
| Si | 0.200984120  | 8.102880478  | 5.887551308 | Si | 0.169896960  | 8.081576347  | 5.920477867 |
| Si | 5.633836269  | 0.548781931  | 8.036094666 | Si | 5.593335629  | 0.570887983  | 8.068721771 |
| Si | 2.504315376  | 0.499720097  | 7.864661217 | Si | 2.468091965  | 0.493683636  | 7.890377998 |
| Si | 0.164494798  | 8.164602280  | 2.791909218 | Si | 0.146375999  | 8.150172234  | 2.836333036 |
| Si | 8.028182983  | 3.117599487  | 0.631462991 | Si | 7.987623692  | 3.121599913  | 0.670131028 |
| Si | 9.613094330  | 2.622784138  | 7.857358932 | Si | 9.575696945  | 2.609365940  | 7.892416477 |
| Si | 17.446794510 | 0.870266676  | 2.762745142 | Si | 17.426301956 | 0.836093783  | 2.810434103 |
| Si | 11.880929947 | 8.341546059  | 0.616847336 | Si | 11.835726738 | 8.321336746  | 0.642829776 |
| Si | 15.012454033 | 8.518127441  | 0.809214532 | Si | 14.950757027 | 8.512127876  | 0.848173797 |
| Si | 17.392515182 | 0.800973058  | 5.880435944 | Si | 17.355819702 | 0.779808223  | 5.913623810 |
| Si | 9.581744194  | 5.769589424  | 8.046754837 | Si | 9.549149513  | 5.763961792  | 8.065501213 |
| Si | 9.615722656  | 8.086187363  | 5.888034344 | Si | 9.582540512  | 8.078267097  | 5.918791294 |
| Si | 15.051058769 | 0.664330900  | 8.000746727 | Si | 15.017431259 | 0.620245934  | 8.039501190 |
| Si | 11.927081108 | 0.508338273  | 7.824563980 | Si | 11.887948990 | 0.492170870  | 7.863083363 |
| Si | 9.597497940  | 8.053595543  | 2.782201052 | Si | 9.568382263  | 8.065880775  | 2.811612368 |
| Si | 17.378570557 | 3.186417103  | 0.593935370 | Si | 17.353958130 | 3.136334419  | 0.636635065 |
| Al | 7.922665119  | 6.273797035  | 0.857843280 | Al | 7.892683506  | 6.285037518  | 0.872876823 |
| Al | 17.366672516 | 6.353588581  | 0.838089228 | Al | 17.389980316 | 6.294619083  | 0.888513148 |
| O  | 1.638761759  | 1.880704403  | 8.016698837 | O  | 1.600411057  | 1.875239253  | 8.031314850 |
| O  | 0.088825583  | 0.220062181  | 2.694360971 | O  | 0.076838568  | 0.207964301  | 2.765223742 |
| O  | 8.190616608  | 2.254945040  | 2.002636671 | O  | 8.124507904  | 2.263244390  | 2.049074888 |
| O  | 2.301221132  | -0.414083064 | 9.193867683 | O  | 2.251151085  | -0.408913583 | 9.226884842 |
| O  | 1.523845911  | 8.288649559  | 1.904385090 | O  | 1.493469238  | 8.280301094  | 1.936555147 |
| O  | -0.711747348 | 2.318764448  | 9.178212166 | O  | -0.748301685 | 2.285555363  | 9.202949524 |
| O  | 6.399427891  | 7.105843067  | 0.766368926 | O  | 6.357367992  | 7.100975037  | 0.756721258 |
| O  | 8.145518303  | 8.807289124  | 6.022197723 | O  | 8.110049248  | 8.796555519  | 6.066104412 |
| O  | 6.520221233  | 0.491869152  | 6.657876015 | O  | 6.481441975  | 0.511644125  | 6.694742680 |
| O  | 8.149806023  | 5.898378849  | 8.751697540 | O  | 8.112688065  | 5.911257744  | 8.762052536 |
| O  | 0.177539021  | 6.665326595  | 6.643126011 | O  | 0.140577763  | 6.639818668  | 6.667510033 |
| O  | 5.009391785  | 8.485187531  | 8.749981880 | O  | 4.977330208  | 8.506914139  | 8.780436516 |
| O  | 1.441128969  | 6.300055981  | 8.953215599 | O  | 1.396118641  | 6.302887917  | 8.984948158 |
| O  | -0.600499153 | 2.039912224  | 6.531453133 | O  | -0.630826712 | 2.021598101  | 6.549356937 |
| O  | 6.736604691  | 0.046837986  | 2.063436270 | O  | 6.724559307  | 0.020899057  | 2.096863270 |
| O  | 6.216272831  | 1.686714649  | 9.019873619 | O  | 6.159023762  | 1.706106186  | 9.063000679 |
| O  | 18.049888611 | 6.991806984  | 2.286246300 | O  | 18.012277603 | 6.992382050  | 2.322736025 |
| O  | 2.028732777  | -0.319139063 | 6.550053120 | O  | 2.000778675  | -0.347192228 | 6.585050583 |
| O  | 0.617682815  | 7.900412083  | 4.339146614 | O  | 0.595273376  | 7.859370232  | 4.376565456 |

|    |              |              |             |    |              |              |             |
|----|--------------|--------------|-------------|----|--------------|--------------|-------------|
| O  | 4.078613281  | 0.926446199  | 7.690256119 | O  | 4.034403801  | 0.935790420  | 7.713606834 |
| O  | 7.513742447  | 4.590057373  | 0.934405386 | O  | 7.499303818  | 4.601442337  | 0.971786082 |
| O  | 7.622119427  | 1.126933813  | 4.343523979 | O  | 7.587181091  | 1.099409223  | 4.378424168 |
| O  | 3.996220350  | 8.105622292  | 1.100015163 | O  | 3.965104818  | 8.120903015  | 1.117973208 |
| O  | 0.487793028  | 4.208357811  | 7.654383659 | O  | 0.425066471  | 4.198719501  | 7.700874329 |
| O  | 11.072130203 | 1.889506817  | 7.958711624 | O  | 11.032659531 | 1.870575666  | 8.000827789 |
| O  | 9.361701965  | 0.003700018  | 2.677007914 | O  | 9.351795197  | 0.029109374  | 2.694947243 |
| O  | 17.437349319 | 2.258285999  | 1.931108356 | O  | 17.423433304 | 2.220247507  | 1.979057312 |
| O  | 11.710581779 | -0.391576171 | 9.166682243 | O  | 11.680757523 | -0.401337177 | 9.212937355 |
| O  | 10.977375984 | 8.361119270  | 1.949149489 | O  | 10.953837395 | 8.353242874  | 1.986108184 |
| O  | 8.794800758  | 2.348030567  | 9.231782913 | O  | 8.748847008  | 2.325737476  | 9.262103081 |
| O  | 15.744739532 | 7.083444118  | 0.527510107 | O  | 15.687613487 | 7.011227131  | 0.620153546 |
| O  | 17.574129105 | 8.822152138  | 6.011474609 | O  | 17.545177460 | 8.803887367  | 6.032430172 |
| O  | 15.970712662 | 0.600807250  | 6.663490295 | O  | 15.947670937 | 0.579152167  | 6.714134216 |
| O  | 17.622371674 | 5.953535080  | 8.785394669 | O  | 17.585073471 | 5.969607830  | 8.829276085 |
| O  | 9.574237823  | 6.656594753  | 6.667852402 | O  | 9.545899391  | 6.643128395  | 6.683889389 |
| O  | 14.482387543 | 8.654506683  | 8.809949875 | O  | 14.477375984 | 8.587873459  | 8.832188606 |
| O  | 10.827687263 | 6.312539101  | 9.006086349 | O  | 10.784825325 | 6.309944630  | 9.029328346 |
| O  | 8.752602577  | 2.029321909  | 6.590595245 | O  | 8.726292610  | 2.019207001  | 6.617369652 |
| O  | 16.327295303 | -0.133156002 | 2.104014397 | O  | 15.647991180 | 9.198936462  | 2.125515461 |
| O  | 15.493821144 | 1.905919075  | 8.951552391 | O  | 15.455140114 | 1.824261069  | 9.040642738 |
| O  | 8.844908714  | 6.757514477  | 2.244940281 | O  | 8.810556412  | 6.780657291  | 2.257997990 |
| O  | 11.439915657 | -0.335645676 | 6.529550552 | O  | 11.409987450 | -0.349261701 | 6.565124035 |
| O  | 10.013239861 | 7.837079048  | 4.347641945 | O  | 9.982398987  | 7.849713802  | 4.375763416 |
| O  | 13.487545013 | 0.920656145  | 7.605981350 | O  | 13.458568573 | 0.877327681  | 7.653359413 |
| O  | 16.983249664 | 4.676725388  | 0.970803618 | O  | 16.972085953 | 4.634816647  | 1.014883757 |
| O  | 17.045038223 | 1.137920618  | 4.324041843 | O  | 16.989782333 | 1.102261066  | 4.357680321 |
| O  | 13.437904358 | 8.176402092  | 1.055458546 | O  | 13.399232864 | 8.149348259  | 1.098073125 |
| O  | 9.939475060  | 4.212656498  | 7.647580624 | O  | 9.887933731  | 4.199667931  | 7.690377235 |
| O  | 14.334037781 | 4.274907112  | 6.443473339 | O  | 14.731296539 | 4.266901970  | 6.743935108 |
| Cu | 4.945633411  | 5.246953011  | 7.529996395 | Cu | 4.845593452  | 5.238053799  | 7.667246819 |
| H  | 5.790972710  | 7.270095348  | 6.362223625 | H  | 5.711875916  | 7.267743111  | 6.539731979 |
| H  | 6.966878414  | 6.410374165  | 7.131922722 | H  | 6.892642021  | 6.352433205  | 7.235634327 |
| H  | 6.450595856  | 5.950685024  | 5.625473499 | H  | 6.307154179  | 5.958754063  | 5.731994152 |
| H  | 5.195934296  | 4.680465698  | 0.104830764 | H  | 5.042111397  | 4.643210888  | 0.217351422 |
| H  | 3.115148306  | 4.758890152  | 9.059382439 | H  | 2.987443924  | 4.758541107  | 9.160028458 |
| H  | 3.487286091  | 3.337340832  | 8.303897858 | H  | 3.341230392  | 3.341187954  | 8.390142441 |
| H  | 12.575368881 | 5.012569904  | 8.821769714 | H  | 12.539816856 | 4.638821125  | 8.796536446 |
| H  | 13.808905602 | 3.800014496  | 8.762913704 | H  | 13.933792114 | 3.565286160  | 8.838024139 |
| H  | 14.271198273 | 5.512885571  | 9.148211479 | H  | 15.099140167 | 6.347154140  | 0.108229622 |
| N  | 6.136734962  | 6.320787907  | 6.525416374 | N  | 6.038503170  | 6.304879665  | 6.655232430 |
| N  | 3.889743090  | 4.195259094  | 8.691182137 | N  | 3.756258965  | 4.183310986  | 8.798139572 |
| N  | 13.641401291 | 5.054986954  | 6.982762814 | N  | 13.768234253 | 4.830788136  | 7.226916313 |
| N  | 13.549702644 | 4.778742790  | 8.569028854 | N  | 13.521606445 | 4.469290733  | 8.557549477 |
